# Supplementary material for: Graphane versus graphene: a computational investigation of the interaction of nucleobases, aminoacids, heterocycles, small molecules (CO2, H2O, NH3, CH4, H2), metal ions and onium ions
Source: Royal Society of Chemistry journal article supplement (doi:10.1039/c5cp05094d), 2015-01-01
Supplement: c5cp05094d1.pdf [file c5cp05094d1.pdf]

## Electronic Supplementary Information

### Graphane versus Graphene: A Computational Investigation of the Interaction of Nucleobases, Aminoacids, Heterocycles, Small Molecules (CO<sub>2</sub>, H<sub>2</sub>O, NH<sub>3</sub>, CH<sub>4</sub>, H<sub>2</sub>), Metal Ions and Onium Ions

Deivasigamani Umadevi\* and G. Narahari Sastry\*

Centre for Molecular Modeling, CSIR - Indian Institute of Chemical Technology,  
Hyderabad - 500 607, INDIA, E-mail: gnsastry@gmail.com

#### Table of Contents

| <b>Figures</b>  |                                                                                                                                                                                                                                     |
|-----------------|-------------------------------------------------------------------------------------------------------------------------------------------------------------------------------------------------------------------------------------|
| <b>Fig. S1</b>  | The atoms shown by the ball-and-stick model were considered for the higher layer and the rest of the atoms shown by the tube model were considered for the lower layer in the ONIOM calculation for (a) graphane and (b) graphene 2 |
| <b>Fig. S2</b>  | Optimized structures and distances (Å) of the complexes of graphene with nucleobases and aminoacids 3                                                                                                                               |
| <b>Fig. S3</b>  | Optimized structures and distances (Å) of the complexes of graphene with various saturated heterocyclic compounds 4                                                                                                                 |
| <b>Fig. S4</b>  | Optimized structures and distances (Å) of the complexes of graphene with various unsaturated heterocyclic compounds 5                                                                                                               |
| <b>Fig. S5</b>  | Optimized structures and distances (Å) of the complexes of graphene with small molecules 6                                                                                                                                          |
| <b>Fig. S6</b>  | Optimized structures and distances (Å) of the complexes of graphene with cations 7                                                                                                                                                  |
| <b>Tables</b>   |                                                                                                                                                                                                                                     |
| <b>Table S1</b> | Binding energy (kcal/mol), charge transfer (amu) and HOMO-LUMO energy gap (eV) of graphene with biomolecules 8                                                                                                                      |
| <b>Table S2</b> | Binding energy (kcal/mol), charge transfer (amu) and HOMO-LUMO energy gap (eV) of graphene with heterocyclic compounds 9                                                                                                            |
| <b>Table S3</b> | Binding energy (kcal/mol), charge transfer (amu) and HOMO-LUMO energy gap (eV) of graphene with small molecules 10                                                                                                                  |
| <b>Table S4</b> | Binding energy (kcal/mol), charge transfer (amu) and HOMO-LUMO energy gap (eV) of graphene with cations 11                                                                                                                          |
|                 | XYZ coordinates of graphane and graphene complexes considered in the study                                                                                                                                                          |

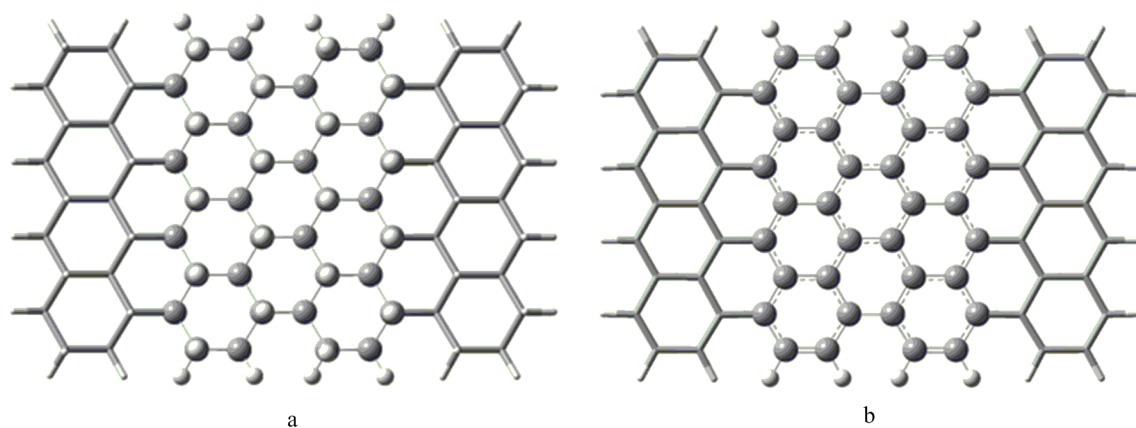

Fig. S1: The atoms shown by the ball-and-stick model were considered for the higher layer and the rest of the atoms shown by the tube model were considered for the lower layer in the ONIOM calculation for (a) graphane and (b) graphene.

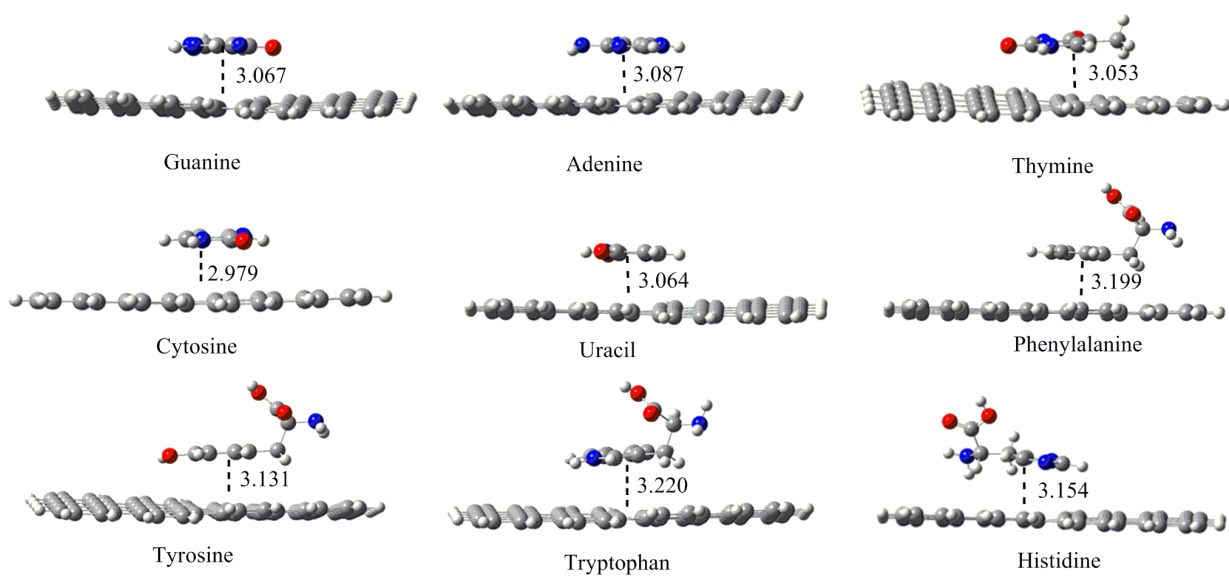

Fig. S2: Optimized structures and distances ( $\text{\AA}$ ) of the complexes of graphene with nucleobases and aminoacids.

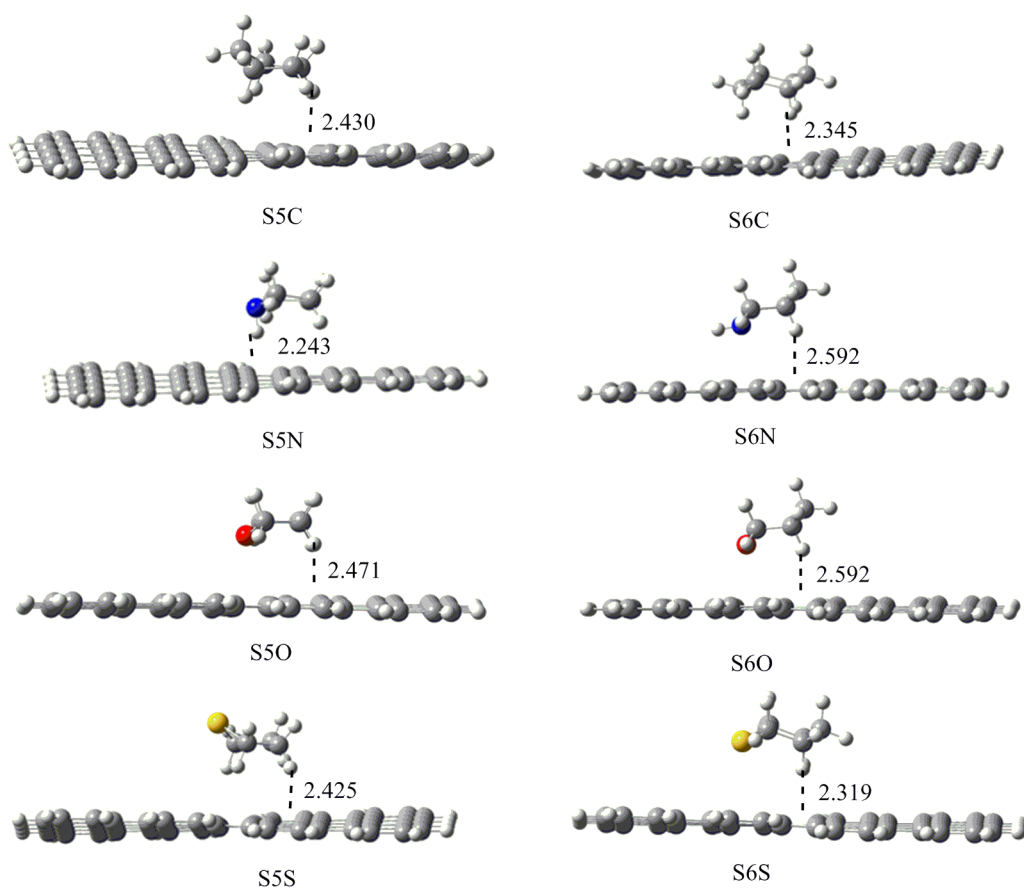

Fig. S3: Optimized structures and distances (Å) of the complexes of graphene with various saturated heterocyclic compounds.

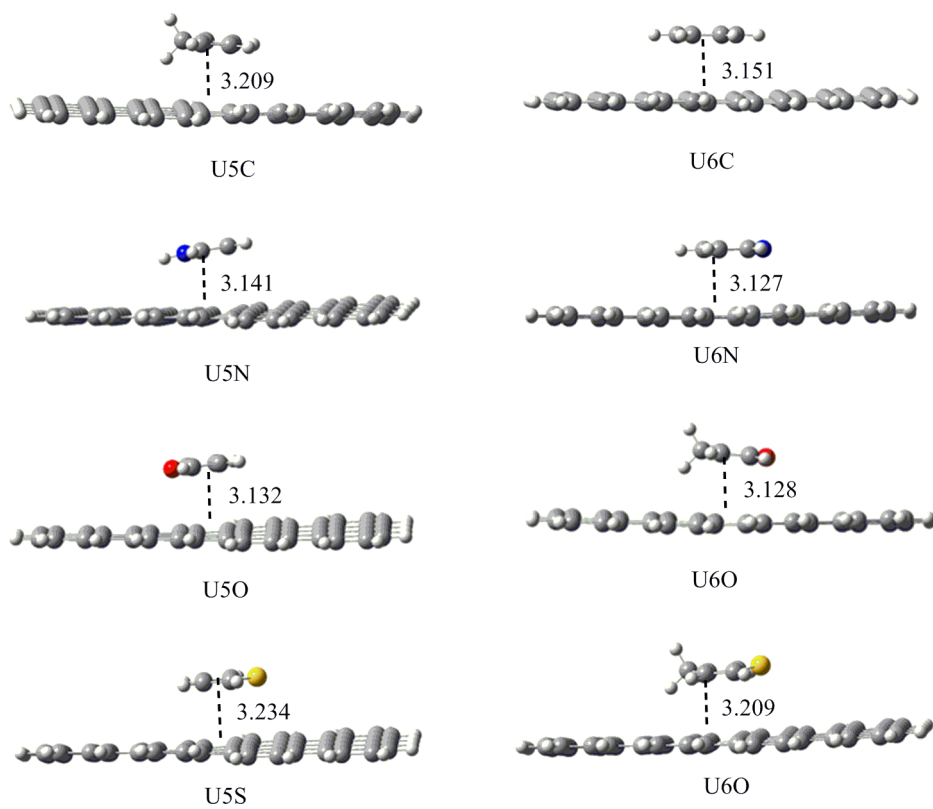

Fig. S4: Optimized structures and distances ( $\text{\AA}$ ) of the complexes of graphene with various unsaturated heterocyclic compounds.

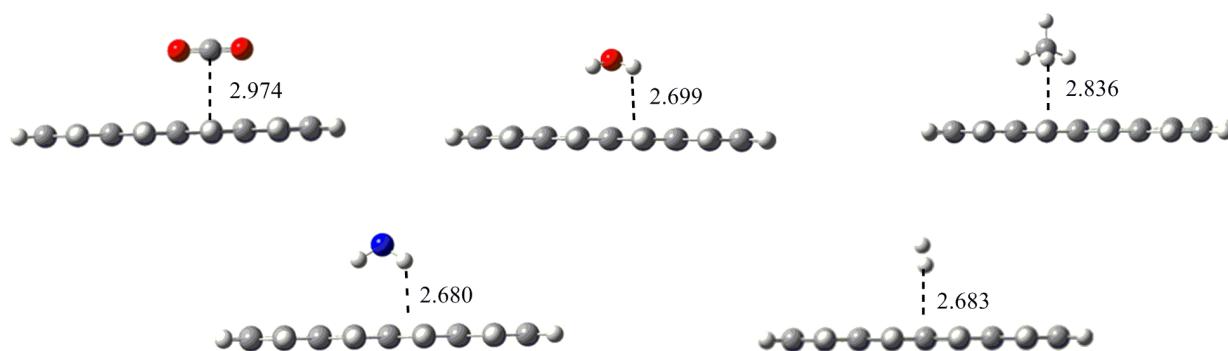

Fig. S5: Optimized structures and distances ( $\text{\AA}$ ) of the complexes of graphene with small molecules.

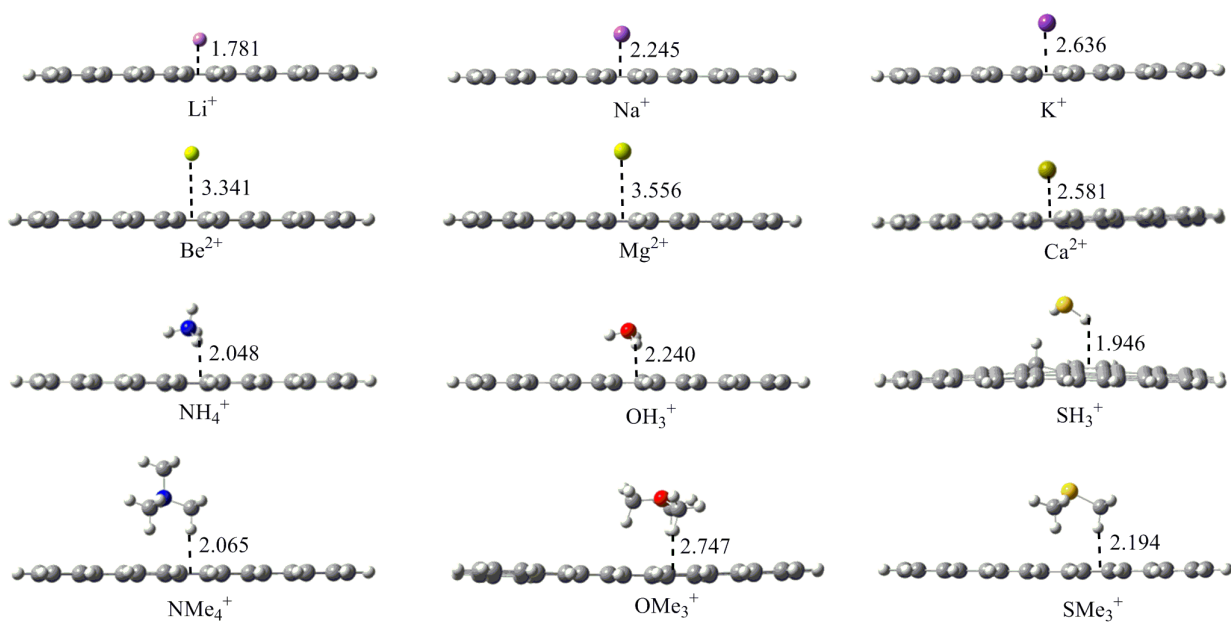

Fig. S6: Optimized structures and distances (Å) of the complexes of graphene with cations.

Table S1 Binding energy (kcal/mol), charge transfer (amu) and HOMO-LUMO energy gap (eV) of graphene complexes with biomolecules

| <b>Biomolecules</b> | <b>Binding energy</b> | <b>Charge transfer</b> | <b>HOMO-LUMO energy gap</b> |
|---------------------|-----------------------|------------------------|-----------------------------|
| Nucleobases         |                       |                        |                             |
| G                   | 21.21                 | -0.014                 | 0.76                        |
| A                   | 19.14                 | -0.007                 | 0.78                        |
| T                   | 18.62                 | -0.004                 | 0.76                        |
| C                   | 18.08                 | -0.007                 | 0.76                        |
| U                   | 16.38                 | -0.001                 | 0.76                        |
| Aminoacids          |                       |                        |                             |
| PHE                 | 15.98                 | 0.006                  | 0.76                        |
| TYR                 | 19.23                 | -0.001                 | 0.76                        |
| TRP                 | 20.38                 | -0.002                 | 0.75                        |
| HIS                 | 17.80                 | -0.006                 | 0.77                        |



Table S2 Binding energy (kcal/mol), charge transfer (amu) and HOMO-LUMO energy gap (eV) of graphene complexes with heterocyclic compounds

| <b>Heterocycles</b> | <b>Binding energy</b> | <b>Charge transfer</b> | <b>HOMO-LUMO energy gap</b> |
|---------------------|-----------------------|------------------------|-----------------------------|
| Unsaturated         |                       |                        |                             |
| U5C                 | 10.40                 | 0.003                  | 0.78                        |
| U5N                 | 10.69                 | -0.005                 | 0.76                        |
| U5O                 | 9.42                  | -0.002                 | 0.78                        |
| U5S                 | 10.32                 | -0.003                 | 0.77                        |
| U6C                 | 11.24                 | 0.004                  | 0.77                        |
| U6N                 | 11.13                 | 0.005                  | 0.76                        |
| U6O                 | 12.58                 | -0.001                 | 0.77                        |
| U6S                 | 14.14                 | -0.005                 | 0.77                        |
| Saturated           |                       |                        |                             |
| S5C                 | 8.38                  | 0.002                  | 0.79                        |
| S5N                 | 9.00                  | -0.001                 | 0.78                        |
| S5O                 | 10.66                 | -0.007                 | 0.77                        |
| S5S                 | 9.09                  | 0.001                  | 0.77                        |
| S6C                 | 8.13                  | 0.004                  | 0.78                        |
| S6N                 | 10.96                 | -0.008                 | 0.77                        |
| S6O                 | 11.13                 | -0.005                 | 0.77                        |
| S6S                 | 8.83                  | -0.002                 | 0.76                        |

Table S3 Binding energy (kcal/mol), charge transfer (amu) and HOMO-LUMO energy gap (eV) of graphene complexes with small molecules

| <b>Small molecules</b> | <b>Binding energy</b> | <b>Charge transfer</b> | <b>HOMO-LUMO energy gap</b> |
|------------------------|-----------------------|------------------------|-----------------------------|
| CO <sub>2</sub>        | 4.57                  | -0.001                 | 0.78                        |
| H <sub>2</sub> O       | 4.69                  | -0.005                 | 0.77                        |
| CH <sub>4</sub>        | 3.49                  | 0.000                  | 0.78                        |
| NH <sub>3</sub>        | 3.78                  | -0.004                 | 0.77                        |
| H <sub>2</sub>         | 1.55                  | 0.001                  | 0.78                        |

Table S4 Binding energy (kcal/mol), charge transfer (amu) and HOMO-LUMO energy gap (eV) of graphene complexes with cations

| <b>Cations</b>                | <b>Binding energy</b> | <b>Charge transfer</b> | <b>HOMO-LUMO energy gap</b> |
|-------------------------------|-----------------------|------------------------|-----------------------------|
| <b>Metal ions</b>             |                       |                        |                             |
| Li <sup>+</sup>               | 55.30                 | 0.063                  | 0.69                        |
| Na <sup>+</sup>               | 40.14                 | 0.021                  | 0.69                        |
| K <sup>+</sup>                | 33.18                 | 0.022                  | 0.69                        |
| Be <sup>2+</sup>              | 355.89                | 2.006                  | 2.66                        |
| Mg <sup>2+</sup>              | 253.35                | 2.002                  | 1.59                        |
| Ca <sup>2+</sup>              | 151.55                | 1.046                  | 0.92                        |
| <b>Onium ions</b>             |                       |                        |                             |
| NH <sub>4</sub> <sup>+</sup>  | 33.08                 | 0.016                  | 0.69                        |
| NMe <sub>4</sub> <sup>+</sup> | 25.62                 | 0.015                  | 0.69                        |
| OH <sub>3</sub> <sup>+</sup>  | 44.20                 | 0.044                  | 0.70                        |
| OMe <sub>3</sub> <sup>+</sup> | 28.50                 | 0.017                  | 0.69                        |
| SMe <sub>3</sub> <sup>+</sup> | 27.59                 | 0.017                  | 0.68                        |

XYZ coordinates (in Å) of graphane complexes optimized at ONIOM (M06-2X/6-31G\*/PM6) level.

Graphane-His

|   |             |             |             |
|---|-------------|-------------|-------------|
| C | 5.20203500  | -1.04925300 | -0.84130500 |
| C | 5.90776700  | -2.35227100 | -0.39580100 |
| C | 3.72181400  | -1.06646000 | -0.40853500 |
| C | 8.11163700  | -1.10609300 | -0.25294300 |
| C | 7.39429900  | -2.33694700 | -0.83371500 |
| C | 5.19669200  | -3.58881100 | -0.99694600 |
| C | 3.00943800  | -2.29157800 | -1.00023900 |
| C | 8.10645500  | -3.62716800 | -0.38296000 |
| C | 5.91130100  | -4.87316100 | -0.52422100 |
| C | 3.70654800  | -3.60621700 | -0.60133300 |
| C | 1.52907700  | -2.31000300 | -0.58331000 |
| C | 7.39013100  | -4.86743600 | -0.92939300 |
| H | 5.82377500  | -4.97105200 | 0.57398000  |
| C | 2.97733800  | -4.79745000 | -1.23671800 |
| C | 0.81233900  | -0.99905400 | -0.94592900 |
| C | 0.78027100  | -3.52455300 | -1.15515100 |
| H | 7.88605000  | -5.78366400 | -0.55816100 |
| C | 1.51306000  | -4.82630400 | -0.81960300 |
| H | 3.03867600  | -4.71571100 | -2.33080100 |
| C | -0.65799000 | -1.02263000 | -0.49398900 |
| C | -0.67400100 | -3.54252900 | -0.66277800 |
| H | 1.02065400  | -5.67392200 | -1.30446600 |
| C | -1.40423500 | -2.24755700 | -1.04889700 |
| C | -1.43508600 | -4.78023600 | -1.14451900 |
| C | -2.87203600 | -2.26826500 | -0.58774800 |
| C | -2.88873600 | -4.77789600 | -0.68977800 |
| H | -1.38617300 | -4.82771100 | -2.24446000 |
| C | -3.57337300 | -0.95629500 | -0.96481200 |
| C | -3.60438300 | -3.50145100 | -1.15074100 |
| H | -3.39645900 | -5.67124900 | -1.07485300 |
| C | -5.04144600 | -0.98218700 | -0.49219700 |
| C | -5.08427200 | -3.51406800 | -0.71716800 |
| C | -5.78277100 | -2.19075500 | -1.11202200 |
| C | -5.83499200 | -4.70315100 | -1.35462300 |
| C | -7.25939600 | -2.21602300 | -0.64274200 |
| H | -5.34425200 | -5.65418900 | -1.07121300 |
| C | -7.30483800 | -4.73158800 | -0.91954000 |
| C | -8.00637200 | -3.41251700 | -1.26363100 |
| C | -7.96290500 | -0.89973100 | -1.01667100 |
| H | -7.82632300 | -5.57547200 | -1.40795000 |
| C | -7.93946400 | 4.12817500  | -0.56189900 |
| C | -7.94077400 | 1.61324800  | -0.78087900 |
| C | -7.21283000 | 5.35039500  | 0.01095100  |
| C | -7.21337400 | 2.82547000  | -0.17374900 |
| C | -7.22702500 | 0.30377900  | -0.40211300 |

|   |             |             |             |
|---|-------------|-------------|-------------|
| C | -5.74539500 | 5.37582300  | -0.43261400 |
| H | -7.72059100 | 6.27769800  | -0.31352200 |
| C | -5.73796000 | 2.86006900  | -0.64611300 |
| C | -5.75429200 | 0.33496300  | -0.87864800 |
| C | -5.01376300 | 4.07893700  | -0.02455500 |
| H | -5.68680000 | 5.51180800  | -1.52899100 |
| C | -5.01832600 | 1.54617400  | -0.25847800 |
| C | -3.53753000 | 4.11476300  | -0.46872600 |
| C | -3.55047800 | 1.57919000  | -0.73120700 |
| C | -2.79106200 | 5.28871500  | 0.17897700  |
| C | -2.82487100 | 2.79158800  | -0.12863500 |
| C | -2.84101000 | 0.26200500  | -0.37784700 |
| C | -1.34283800 | 5.33811400  | -0.29059000 |
| H | -3.28666100 | 6.24098700  | -0.04633200 |
| C | -1.35858700 | 2.82418300  | -0.59374400 |
| C | -1.37660700 | 0.28999800  | -0.83970000 |
| C | -0.59761900 | 4.02903300  | -0.01588400 |
| H | -1.31229600 | 5.54563500  | -1.37173100 |
| C | -0.63404500 | 1.50779600  | -0.26828700 |
| C | 0.84690900  | 4.06213700  | -0.53875900 |
| C | 0.83438300  | 1.53515300  | -0.72902800 |
| C | 1.61500800  | 5.28951400  | -0.04108200 |
| C | 1.58250500  | 2.76162900  | -0.17793500 |
| C | 1.55160000  | 0.22235800  | -0.37832000 |
| C | 3.06570800  | 5.29274100  | -0.50520500 |
| H | 1.12822000  | 6.20522200  | -0.38911600 |
| C | 3.05352400  | 2.77916700  | -0.62726500 |
| C | 3.02477300  | 0.24360900  | -0.80925600 |
| C | 3.78460400  | 4.01216200  | -0.06167000 |
| H | 3.09579700  | 5.36533000  | -1.60141200 |
| C | 3.74752600  | 1.46941400  | -0.22624400 |
| C | 5.26458300  | 4.02241600  | -0.49439500 |
| C | 5.22407400  | 1.48541300  | -0.67200000 |
| C | 6.01308900  | 5.22383000  | 0.12166000  |
| C | 5.95887900  | 2.70621400  | -0.06829100 |
| C | 5.92712600  | 0.17731100  | -0.23894700 |
| C | 7.48551200  | 5.24079100  | -0.30494000 |
| H | 5.52636900  | 6.17035300  | -0.18166700 |
| C | 7.44083800  | 2.71861200  | -0.52048500 |
| C | 7.40869600  | 0.19170100  | -0.68844700 |
| C | 8.18285000  | 3.93006800  | 0.07662200  |
| H | 7.56041700  | 5.40455100  | -1.39711800 |
| C | 8.13714800  | 1.41250100  | -0.10003500 |
| H | -8.06534800 | -3.29491300 | -2.36196400 |
| H | -8.01448100 | -0.79432000 | -2.11622200 |
| H | -8.98787300 | 1.58654100  | -0.42808600 |
| H | -8.98204400 | 4.10242400  | -0.19577500 |
| H | 8.23297400  | 3.83958200  | 1.17819900  |
| H | 9.18970400  | 1.42131900  | -0.43728700 |
| H | 8.14478400  | -1.16908600 | 0.85068800  |

|   |             |             |             |
|---|-------------|-------------|-------------|
| H | 9.15758900  | -3.61693500 | -0.72502400 |
| H | -0.63416100 | 1.40265500  | 0.83375700  |
| H | -0.65854400 | -1.12563000 | 0.60867100  |
| H | 1.54248000  | 0.11906100  | 0.72457700  |
| H | -1.37855800 | 0.39061300  | -1.94147900 |
| H | 0.83223100  | 1.62385000  | -1.83108900 |
| H | 0.82271200  | -0.90786400 | -2.04786000 |
| H | -1.36738100 | 2.93688100  | -1.69448200 |
| H | -2.82024600 | 2.67855400  | 0.96960200  |
| H | -3.53205900 | 1.68719100  | -1.83560900 |
| H | -2.83581900 | 0.15843800  | 0.72210600  |
| H | -3.55402100 | -0.86135900 | -2.07057600 |
| H | -2.86451900 | -2.35588200 | 0.51206300  |
| H | -1.40458900 | -2.17061200 | -2.15318400 |
| H | -0.64938900 | -3.57422200 | 0.43801300  |
| H | 0.76805300  | -3.41843500 | -2.25501300 |
| H | 1.50067600  | -2.40533500 | 0.52046900  |
| H | -0.55193100 | 3.89378500  | 1.08064900  |
| H | 0.80071300  | 4.11972400  | -1.64115400 |
| H | 1.58779300  | 2.68890700  | 0.92725500  |
| H | 3.06186100  | 2.85257900  | -1.72844500 |
| H | 3.70786900  | 1.39018000  | 0.88065000  |
| H | 3.04404900  | 0.32349600  | -1.90953900 |
| H | 3.67341300  | -1.14772600 | 0.69844800  |
| H | 3.04161200  | -2.20951500 | -2.10025300 |
| H | -5.05918300 | -1.08596600 | 0.61915200  |
| H | -5.76413800 | -2.09295100 | -2.22265200 |
| H | -5.12877500 | -3.62436300 | 0.39395300  |
| H | -3.55413800 | -3.44516500 | -2.25731200 |
| H | -5.76953800 | -4.64295200 | -2.45703700 |
| H | -7.37100700 | -4.92135600 | 0.16926500  |
| H | -9.05052300 | -3.43455400 | -0.90216000 |
| H | -7.27708700 | -2.32787700 | 0.46857800  |
| H | -9.01071500 | -0.91979200 | -0.66576200 |
| H | -5.74225000 | 0.43729400  | -1.98933300 |
| H | -7.24120000 | 0.19939400  | 0.71009900  |
| H | -7.99536300 | 1.71276100  | -1.88089300 |
| H | -7.22851800 | 2.73111200  | 0.93913100  |
| H | -5.72344000 | 2.96321300  | -1.75655100 |
| H | -5.03596200 | 1.44410900  | 0.85293700  |
| H | -8.00480300 | 4.21278100  | -1.66302300 |
| H | -7.27265800 | 5.34098100  | 1.11631900  |
| H | -5.23756600 | 6.25348800  | 0.01067800  |
| H | -5.05215600 | 3.98759100  | 1.08772600  |
| H | -3.49695700 | 4.24207700  | -1.56917700 |
| H | 3.73479600  | 3.95107500  | 1.04401300  |
| H | 5.31392500  | 4.10917600  | -1.60639400 |
| H | 9.23025900  | 3.94266600  | -0.27612500 |
| H | 8.00453600  | 6.09572700  | 0.16723400  |
| H | 5.94197800  | 5.18582700  | 1.22521300  |

|   |             |             |             |
|---|-------------|-------------|-------------|
| H | 3.57602900  | 6.18300100  | -0.11784200 |
| H | 1.58074100  | 5.31044900  | 1.05949300  |
| H | -0.83714400 | 6.17204800  | 0.20499600  |
| H | -2.81341200 | 5.17377600  | 1.27164500  |
| H | 8.17446800  | 1.33913900  | 1.00289200  |
| H | 9.16568500  | -1.09279000 | -0.58557500 |
| H | 8.14624700  | -3.67302400 | 0.72165500  |
| H | 7.47912000  | -4.89898800 | -2.03241300 |
| H | 5.41218900  | -5.76415100 | -0.95076900 |
| H | 3.46213300  | -5.74373500 | -0.96612300 |
| H | 1.43901400  | -4.99830700 | 0.26686600  |
| H | -0.95232000 | -5.68736500 | -0.76692200 |
| H | -2.91864200 | -4.83586500 | 0.40644900  |
| H | 5.92800800  | 2.63034700  | 1.04419200  |
| H | 5.26190600  | 1.56098900  | -1.78504900 |
| H | 5.89408600  | 0.10440000  | 0.87373000  |
| H | 5.24863500  | -0.97999000 | -1.95457200 |
| H | 5.86672800  | -2.42036100 | 0.71646000  |
| H | 5.27000800  | -3.53478000 | -2.11015100 |
| H | 3.62979000  | -3.70056600 | 0.50211600  |
| H | 7.44395200  | 0.25960400  | -1.80296900 |
| H | 7.43604900  | -2.28170700 | -1.94855900 |
| H | 7.47269400  | 2.79929000  | -1.63398700 |
| N | 0.51940900  | 1.05899900  | 3.34925200  |
| H | -0.04651200 | 1.88239700  | 3.54752400  |
| C | -0.32437800 | -0.12594900 | 3.44592000  |
| H | -1.07810900 | -0.20196000 | 2.63750300  |
| C | 0.55617600  | -1.37928000 | 3.40728800  |
| C | -1.13151000 | 0.04291000  | 4.72678200  |
| H | 1.31735000  | -1.20905200 | 2.63195800  |
| H | 1.09675600  | -1.45620600 | 4.35845600  |
| C | -0.17822000 | -2.64800700 | 3.10397400  |
| O | -1.58414900 | 1.10207400  | 5.08423400  |
| N | 0.48607000  | -3.83332800 | 2.87419000  |
| C | -1.50621800 | -2.98074900 | 3.00005000  |
| H | 1.48871500  | -3.95618800 | 2.85856100  |
| C | -0.45035000 | -4.80009800 | 2.65511000  |
| N | -1.66524500 | -4.31755300 | 2.72267800  |
| H | -2.36060000 | -2.33175300 | 3.13601100  |
| H | -0.18415100 | -5.82670000 | 2.44323000  |
| H | 0.87517200  | 1.15114500  | 2.40076400  |
| O | -1.31276900 | -1.09415000 | 5.41217600  |
| H | -1.86046100 | -0.87024900 | 6.18575400  |

#### Graphane-Phe

|   |             |            |             |
|---|-------------|------------|-------------|
| C | -4.98270300 | 1.66819200 | -0.83017600 |
| C | -5.72109300 | 2.84632900 | -0.15076900 |
| C | -3.52285800 | 1.58976200 | -0.33684100 |
| C | -7.91664900 | 1.59960300 | -0.37177400 |
| C | -7.18534000 | 2.92393400 | -0.65199000 |

|   |             |             |             |
|---|-------------|-------------|-------------|
| C | -4.99323200 | 4.18169600  | -0.43790700 |
| C | -2.79640200 | 2.91572700  | -0.60714900 |
| C | -7.93103800 | 4.09235100  | 0.02166700  |
| C | -5.74504800 | 5.33841500  | 0.25508600  |
| C | -3.52791100 | 4.10898600  | 0.03741100  |
| C | -1.34030200 | 2.83643800  | -0.11704300 |
| C | -7.20099700 | 5.41865400  | -0.21873100 |
| H | -5.71388000 | 5.20350400  | 1.35260300  |
| C | -2.77897500 | 5.41158200  | -0.27329700 |
| C | -0.59505400 | 1.64386200  | -0.74081400 |
| C | -0.57833400 | 4.15043500  | -0.35592700 |
| H | -7.72412400 | 6.23826600  | 0.30813700  |
| C | -1.34149700 | 5.34412800  | 0.22467500  |
| H | -2.77831000 | 5.57924000  | -1.35945200 |
| C | 0.85393700  | 1.55985900  | -0.23166100 |
| C | 0.85199300  | 4.05792300  | 0.19564700  |
| H | -0.83388400 | 6.27910700  | -0.02981900 |
| C | 1.61125400  | 2.88163800  | -0.44110200 |
| C | 1.62527000  | 5.36910400  | 0.02621300  |
| C | 3.05895900  | 2.79271600  | 0.07246000  |
| C | 3.05632200  | 5.26693800  | 0.53649800  |
| H | 1.63241000  | 5.64249800  | -1.04057700 |
| C | 3.78891700  | 1.60801000  | -0.57760300 |
| C | 3.80572000  | 4.12122900  | -0.15653300 |
| H | 3.57332400  | 6.22239500  | 0.38414000  |
| C | 5.23630600  | 1.51939600  | -0.05051200 |
| C | 5.26346200  | 4.03280800  | 0.33869900  |
| C | 5.99200600  | 2.84106100  | -0.32788700 |
| C | 6.02976200  | 5.33883500  | 0.03697800  |
| C | 7.44661400  | 2.75252400  | 0.19893200  |
| H | 5.51810600  | 6.19745200  | 0.51211000  |
| C | 7.47836600  | 5.26210500  | 0.53315800  |
| C | 8.20768200  | 4.06265500  | -0.08284300 |
| C | 8.17911200  | 1.56546200  | -0.45006200 |
| H | 8.01233000  | 6.19764800  | 0.28257400  |
| C | 8.18897300  | -3.41884200 | -1.24140400 |
| C | 8.17283000  | -0.92781600 | -0.83558900 |
| C | 7.45103000  | -4.74431900 | -1.02161900 |
| C | 7.43257900  | -2.25162500 | -0.57785700 |
| C | 7.42929000  | 0.24917800  | -0.18048600 |
| C | 6.00510200  | -4.65826600 | -1.52412500 |
| H | 7.98251700  | -5.56279700 | -1.54207700 |
| C | 5.97962300  | -2.16772300 | -1.10998700 |
| C | 5.97869800  | 0.33609700  | -0.71488800 |
| C | 5.24241700  | -3.50208200 | -0.84205700 |
| H | 5.99667500  | -4.51853900 | -2.62166900 |
| C | 5.22937300  | -0.98973500 | -0.44348800 |
| C | 3.78743200  | -3.42531800 | -1.34750100 |
| C | 3.78272800  | -0.90465700 | -0.97333800 |
| C | 3.02856900  | -4.72539500 | -1.04987900 |



|   |             |             |             |
|---|-------------|-------------|-------------|
| C | 3.04563500  | -2.22830600 | -0.72098700 |
| C | 3.04369100  | 0.28455600  | -0.33822700 |
| C | 1.59948600  | -4.65240100 | -1.57074300 |
| H | 3.54239800  | -5.58871200 | -1.49016200 |
| C | 1.59694800  | -2.14614200 | -1.23410500 |
| C | 1.60078400  | 0.37076300  | -0.85710600 |
| C | 0.83477000  | -3.45940300 | -0.99146800 |
| H | 1.61002700  | -4.57129000 | -2.66882700 |
| C | 0.84720800  | -0.94854200 | -0.62588000 |
| C | -0.60337500 | -3.37424400 | -1.52204700 |
| C | -0.60297100 | -0.86678700 | -1.13080500 |
| C | -1.36935300 | -4.68333300 | -1.30808100 |
| C | -1.35188800 | -2.18840500 | -0.89006500 |
| C | -1.34266300 | 0.32304500  | -0.49821800 |
| C | -2.81183300 | -4.59541200 | -1.78658400 |
| H | -0.87246700 | -5.50613500 | -1.83047500 |
| C | -2.81229300 | -2.11242800 | -1.36831100 |
| C | -2.79594400 | 0.40161600  | -0.98760600 |
| C | -3.54772200 | -3.43916500 | -1.09717600 |
| H | -2.82260500 | -4.43543400 | -2.87388600 |
| C | -3.52922500 | -0.92172700 | -0.71469000 |
| C | -5.01703200 | -3.36388100 | -1.55891500 |
| C | -4.99051200 | -0.84490300 | -1.20398700 |
| C | -5.77120600 | -4.66805700 | -1.22117700 |
| C | -5.73426800 | -2.16560700 | -0.89202000 |
| C | -5.72087500 | 0.34181000  | -0.53234200 |
| C | -7.23074800 | -4.60313700 | -1.68600000 |
| H | -5.26731600 | -5.53194700 | -1.69497700 |
| C | -7.20093800 | -2.08878400 | -1.38629300 |
| C | -7.18371400 | 0.41965200  | -1.03377500 |
| C | -7.95062900 | -3.39778000 | -1.07041200 |
| H | -7.27277600 | -4.54430900 | -2.79051500 |
| C | -7.92328400 | -0.89639000 | -0.73552500 |
| H | 8.31728500  | 4.21086300  | -1.17375400 |
| H | 8.28090700  | 1.72978100  | -1.53899600 |
| H | 9.20319500  | -0.98898100 | -0.44023700 |
| H | 9.21408400  | -3.48483300 | -0.83327900 |
| H | -8.03537500 | -3.53180900 | 0.02456900  |
| H | -8.96228100 | -0.83691300 | -1.10774900 |
| H | -7.99881400 | 1.43324200  | 0.71843100  |
| H | -8.96427300 | 4.15404900  | -0.36601200 |
| H | 0.79789500  | -1.10779400 | 0.46715300  |
| H | 0.80463100  | 1.37822300  | 0.85738300  |
| H | -1.36902600 | 0.15329300  | 0.59353900  |
| H | 1.64933000  | 0.54246200  | -1.94918500 |
| H | -0.56917600 | -0.69774600 | -2.22369500 |
| H | -0.55721100 | 1.81229400  | -1.83372400 |
| H | 1.64494900  | -1.98824400 | -2.32831500 |
| H | 2.99770900  | -2.39231700 | 0.37079000  |
| H | 3.81175100  | -0.73773200 | -2.07002200 |

|   |             |             |             |
|---|-------------|-------------|-------------|
| H | 2.98817700  | 0.11199800  | 0.75144100  |
| H | 3.81643200  | 1.78564000  | -1.67273700 |
| H | 3.01053200  | 2.61107200  | 1.16046700  |
| H | 1.66040700  | 3.07168800  | -1.53015900 |
| H | 0.77665200  | 3.85128500  | 1.27927000  |
| H | -0.50616300 | 4.29793200  | -1.44872200 |
| H | -1.37362900 | 2.66582200  | 0.97561600  |
| H | 0.77396800  | -3.60506800 | 0.10205300  |
| H | -0.54936600 | -3.18916800 | -2.61012000 |
| H | -1.37531200 | -2.35517500 | 0.20419600  |
| H | -2.79422200 | -1.94819400 | -2.45985200 |
| H | -3.52412300 | -1.08513600 | 0.38282500  |
| H | -2.77118600 | 0.56676700  | -2.07888900 |
| H | -3.52143800 | 1.42037300  | 0.75991200  |
| H | -2.77041300 | 3.08104000  | -1.69833000 |
| H | 5.20686200  | 1.34945800  | 1.05211300  |
| H | 6.02330600  | 3.01186400  | -1.42964600 |
| H | 5.25806800  | 3.87462900  | 1.44394400  |
| H | 3.80812900  | 4.31752500  | -1.24745200 |
| H | 6.01531500  | 5.54058100  | -1.05075000 |
| H | 7.49559800  | 5.18790100  | 1.63744900  |
| H | 9.23464200  | 3.99700000  | 0.32046800  |
| H | 7.41577200  | 2.59301700  | 1.30393000  |
| H | 9.21018900  | 1.49873100  | -0.05757500 |
| H | 6.01541400  | 0.50847800  | -1.81644800 |
| H | 7.39462100  | 0.07866100  | 0.92297100  |
| H | 8.27688300  | -0.75472500 | -1.92296400 |
| H | 7.39845100  | -2.43392300 | 0.52349500  |
| H | 6.01473700  | -1.99353800 | -2.21115000 |
| H | 5.19867300  | -1.16331800 | 0.65845200  |
| H | 8.30407000  | -3.22930900 | -2.32534800 |
| H | 7.46237300  | -5.00904000 | 0.05312200  |
| H | 5.48776900  | -5.61824800 | -1.33601900 |
| H | 5.23160600  | -3.68861400 | 0.25853900  |
| H | 3.79592400  | -3.27316400 | -2.44527700 |
| H | -3.52293900 | -3.61542800 | -0.00249700 |
| H | -5.03810600 | -3.22107000 | -2.66612600 |
| H | -8.98646600 | -3.34113700 | -1.45165400 |
| H | -7.75545400 | -5.53693200 | -1.41051100 |
| H | -5.73157700 | -4.85417400 | -0.13118100 |
| H | -3.32173100 | -5.54948800 | -1.60463200 |
| H | -1.35229600 | -4.93326400 | -0.23489400 |
| H | 1.08631800  | -5.58731700 | -1.32842500 |
| H | 3.00807000  | -4.89357400 | 0.03689500  |
| H | -8.00250700 | -1.04948200 | 0.35686200  |
| H | -8.95469400 | 1.65576600  | -0.74722600 |
| H | -8.02359100 | 3.90735100  | 1.10846500  |
| H | -7.23390700 | 5.67791200  | -1.29439200 |
| H | -5.23394100 | 6.29873500  | 0.05192500  |
| H | -3.28705100 | 6.27346300  | 0.17675000  |

|   |             |             |             |
|---|-------------|-------------|-------------|
| H | -1.33578500 | 5.26906200  | 1.32372000  |
| H | 1.11772800  | 6.18099100  | 0.55546700  |
| H | 3.04157900  | 5.08746900  | 1.62074800  |
| H | -5.73963400 | -2.32212300 | 0.21223000  |
| H | -4.99045300 | -0.68632100 | -2.30870200 |
| H | -5.73158600 | 0.17780900  | 0.57090400  |
| H | -4.97944100 | 1.83649100  | -1.93344500 |
| H | -5.73205700 | 2.67535200  | 0.95118400  |
| H | -5.00426900 | 4.36442600  | -1.53939500 |
| H | -3.51359200 | 3.95377700  | 1.13559900  |
| H | -7.17465900 | 0.58083800  | -2.13910200 |
| H | -7.17485400 | 3.10072400  | -1.75470900 |
| H | -7.19589900 | -1.94307800 | -2.49357400 |
| N | 1.24140900  | -4.62914500 | 4.05754700  |
| H | 0.61516200  | -5.30543100 | 3.62251100  |
| C | 0.53025600  | -3.36510700 | 4.17895500  |
| H | 1.11418100  | -2.67269400 | 4.79320000  |
| C | 0.19000500  | -2.69618100 | 2.82552100  |
| C | -0.77829600 | -3.65897600 | 4.88725600  |
| H | 1.13637400  | -2.49656800 | 2.30554700  |
| H | -0.36659600 | -3.43079000 | 2.22883700  |
| C | -0.61128400 | -1.42700900 | 2.96590800  |
| O | -1.53821100 | -4.52901900 | 4.53530600  |
| C | 0.02194600  | -0.19705900 | 3.16166700  |
| C | -2.00906400 | -1.46835900 | 2.95097800  |
| H | 1.10974300  | -0.15101400 | 3.16345500  |
| C | -0.72176500 | 0.96757200  | 3.33312100  |
| C | -2.75653700 | -0.30592300 | 3.12306700  |
| H | -2.51003600 | -2.42285200 | 2.79750200  |
| H | -0.21394200 | 1.91823900  | 3.47114000  |
| C | -2.11404300 | 0.91575800  | 3.31411400  |
| H | -3.84169000 | -0.35213800 | 3.09381500  |
| H | -2.69538400 | 1.82549200  | 3.43650000  |
| H | 2.04117800  | -4.51465800 | 3.43865900  |
| O | -1.02936300 | -2.82831300 | 5.90550500  |
| H | -1.90910900 | -3.06439500 | 6.25059600  |

#### Graphane-Trp

|   |             |            |             |
|---|-------------|------------|-------------|
| C | -5.05765700 | 1.79164100 | -0.73153600 |
| C | -5.80508500 | 2.90575900 | 0.03978400  |
| C | -3.58932300 | 1.70461200 | -0.26476500 |
| C | -7.98307800 | 1.63905200 | -0.23684000 |
| C | -7.27820000 | 2.99269200 | -0.43289700 |
| C | -5.10413300 | 4.27063200 | -0.16301200 |
| C | -2.88841900 | 3.05831000 | -0.45099600 |
| C | -8.03242500 | 4.09709100 | 0.33302300  |
| C | -5.86392400 | 5.36194700 | 0.62141500  |
| C | -3.63043200 | 4.19075700 | 0.28475200  |
| C | -1.42484200 | 2.97045900 | 0.01541000  |
| C | -7.32842400 | 5.44981400 | 0.17642400  |

|   |             |             |             |
|---|-------------|-------------|-------------|
| H | -5.81250400 | 5.15041400  | 1.70603500  |
| C | -2.90857300 | 5.52501000  | 0.05539200  |
| C | -0.66869600 | 1.83626500  | -0.69770200 |
| C | -0.68871700 | 4.31146100  | -0.14279600 |
| H | -7.85639600 | 6.22080200  | 0.76786600  |
| C | -1.46345200 | 5.44877900  | 0.52939200  |
| H | -2.92555100 | 5.76716500  | -1.01648500 |
| C | 0.78738600  | 1.74205800  | -0.21130800 |
| C | 0.75137800  | 4.20705000  | 0.38070200  |
| H | -0.97551500 | 6.40827900  | 0.33474100  |
| C | 1.51923300  | 3.08819700  | -0.34372500 |
| C | 1.50063800  | 5.53962500  | 0.28543200  |
| C | 2.97688100  | 2.99169700  | 0.13938200  |
| C | 2.94129600  | 5.42981400  | 0.76621800  |
| H | 1.48687500  | 5.88079200  | -0.76168800 |
| C | 3.71449600  | 1.86579100  | -0.60088600 |
| C | 3.69783100  | 4.34525900  | -0.01229100 |
| H | 3.43972900  | 6.40224500  | 0.66870800  |
| C | 5.17283600  | 1.76791700  | -0.10638300 |
| C | 5.16488400  | 4.24867000  | 0.45360300  |
| C | 5.90133600  | 3.11853700  | -0.30545400 |
| C | 5.90503400  | 5.58549900  | 0.23231100  |
| C | 7.36650800  | 3.01919900  | 0.18911900  |
| H | 5.38767300  | 6.39992400  | 0.77416200  |
| C | 7.36276200  | 5.49908900  | 0.69949700  |
| C | 8.10104500  | 4.35910200  | -0.01149000 |
| C | 8.10631400  | 1.89379600  | -0.55472400 |
| H | 7.87721700  | 6.45910500  | 0.50816300  |
| C | 8.18249200  | -3.02793600 | -1.67695500 |
| C | 8.13319500  | -0.56774700 | -1.11129200 |
| C | 7.47355100  | -4.37836500 | -1.52156300 |
| C | 7.42171000  | -1.91902600 | -0.92421100 |
| C | 7.38415100  | 0.54868900  | -0.36286400 |
| C | 6.01412400  | -4.28947500 | -1.98294000 |
| H | 8.00613700  | -5.15349800 | -2.10315100 |
| C | 5.95582600  | -1.82915000 | -1.41849000 |
| C | 5.92186900  | 0.64518800  | -0.86242200 |
| C | 5.24862900  | -3.19076900 | -1.21427400 |
| H | 5.97521300  | -4.08487200 | -3.06942600 |
| C | 5.20050400  | -0.70868500 | -0.66454500 |
| C | 3.78051500  | -3.11399400 | -1.67929900 |
| C | 3.74283100  | -0.61602000 | -1.16142300 |
| C | 3.04948200  | -4.43857100 | -1.42217600 |
| C | 3.03314900  | -1.96492500 | -0.97609500 |
| C | 2.99649200  | 0.51634600  | -0.43671100 |
| C | 1.61203100  | -4.36954400 | -1.92090700 |
| H | 3.57069600  | -5.27493000 | -1.90425600 |
| C | 1.57603900  | -1.87858900 | -1.46294600 |
| C | 1.54364400  | 0.60971500  | -0.92477700 |
| C | 0.83333400  | -3.21354200 | -1.28734100 |

|   |             |             |             |
|---|-------------|-------------|-------------|
| H | 1.60682000  | -4.24715500 | -3.01553900 |
| C | 0.81528700  | -0.73501500 | -0.77101800 |
| C | -0.60369600 | -3.11538900 | -1.81883800 |
| C | -0.64014600 | -0.64146900 | -1.25979900 |
| C | -1.34839800 | -4.44777700 | -1.69518400 |
| C | -1.36797500 | -1.98703400 | -1.10534600 |
| C | -1.39099900 | 0.48909100  | -0.53869500 |
| C | -2.79535700 | -4.35050000 | -2.15785900 |
| H | -0.84133700 | -5.22471900 | -2.27506500 |
| C | -2.83234500 | -1.90219800 | -1.56725600 |
| C | -2.85167800 | 0.57730200  | -1.00540100 |
| C | -3.54133000 | -3.25731000 | -1.38248700 |
| H | -2.81798700 | -4.11310500 | -3.23058600 |
| C | -3.55983500 | -0.77450700 | -0.82120000 |
| C | -5.01983900 | -3.17661900 | -1.81299500 |
| C | -5.03016500 | -0.68871700 | -1.28123600 |
| C | -5.74724300 | -4.51476000 | -1.56080500 |
| C | -5.74713500 | -2.04116100 | -1.05338700 |
| C | -5.76936600 | 0.43489100  | -0.51733800 |
| C | -7.21415600 | -4.44165400 | -2.00095200 |
| H | -5.23590200 | -5.33194900 | -2.10505900 |
| C | -7.22178800 | -1.95479100 | -1.52199600 |
| C | -7.24078600 | 0.52229500  | -0.99143400 |
| C | -7.94585100 | -3.29583800 | -1.29264200 |
| H | -7.27178300 | -4.30452300 | -3.09803500 |
| C | -7.95444800 | -0.82448400 | -0.77865200 |
| H | 8.18919000  | 4.58550700  | -1.09079900 |
| H | 8.18294300  | 2.13463200  | -1.63132300 |
| H | 9.17335000  | -0.63530300 | -0.74411600 |
| H | 9.21829200  | -3.09910600 | -1.29822900 |
| H | -8.01732900 | -3.50903500 | -0.20969500 |
| H | -8.99911800 | -0.75618900 | -1.13348100 |
| H | -8.04553600 | 1.39507600  | 0.83988600  |
| H | -9.07260300 | 4.16785300  | -0.03386500 |
| H | 0.77944500  | -0.97078100 | 0.30916700  |
| H | 0.75459400  | 1.48685900  | 0.86351500  |
| H | -1.39893700 | 0.24437600  | 0.53871700  |
| H | 1.57108900  | 0.85335800  | -2.00397600 |
| H | -0.61693500 | -0.39532100 | -2.33835500 |
| H | -0.64676400 | 2.07988900  | -1.77683000 |
| H | 1.60585600  | -1.65524200 | -2.54661100 |
| H | 3.00830000  | -2.19115800 | 0.10399800  |
| H | 3.74700400  | -0.37939300 | -2.24574400 |
| H | 2.96406700  | 0.27164700  | 0.63956300  |
| H | 3.71866200  | 2.11660100  | -1.68200500 |
| H | 2.95074000  | 2.73716300  | 1.21322600  |
| H | 1.54695300  | 3.35021600  | -1.41855800 |
| H | 0.69630100  | 3.92846900  | 1.44914200  |
| H | -0.63602200 | 4.53482000  | -1.22375100 |
| H | -1.43990100 | 2.72520800  | 1.09431600  |

|   |             |             |             |
|---|-------------|-------------|-------------|
| H | 0.76416300  | -3.40914300 | -0.20291800 |
| H | -0.55026600 | -2.85719800 | -2.89216600 |
| H | -1.37995100 | -2.22900600 | -0.02715400 |
| H | -2.83193900 | -1.66112400 | -2.64442000 |
| H | -3.53351100 | -1.01852200 | 0.26132200  |
| H | -2.84300600 | 0.81854200  | -2.08261000 |
| H | -3.56848300 | 1.46116600  | 0.81713700  |
| H | -2.87923300 | 3.29944100  | -1.52816900 |
| H | 5.16628500  | 1.52241600  | 0.98240700  |
| H | 5.90975300  | 3.36464700  | -1.39321700 |
| H | 5.17999200  | 4.01380500  | 1.54501200  |
| H | 3.67965300  | 4.61342800  | -1.08769500 |
| H | 5.86937900  | 5.86197600  | -0.83833700 |
| H | 7.39927100  | 5.34659000  | 1.79525300  |
| H | 9.13564300  | 4.28307900  | 0.36970300  |
| H | 7.35814800  | 2.78131500  | 1.28034700  |
| H | 9.14592800  | 1.81880200  | -0.18739500 |
| H | 5.93305100  | 0.89051000  | -1.95048600 |
| H | 7.37425700  | 0.30211300  | 0.72670900  |
| H | 8.20770200  | -0.32186800 | -2.18686300 |
| H | 7.41487400  | -2.17197300 | 0.16379000  |
| H | 5.96192400  | -1.58825400 | -2.50732100 |
| H | 5.19307300  | -0.95410600 | 0.42454100  |
| H | 8.26629200  | -2.76985800 | -2.74942600 |
| H | 7.51529800  | -4.70675200 | -0.46518400 |
| H | 5.51747500  | -5.26800000 | -1.83943700 |
| H | 5.26741800  | -3.44259900 | -0.12622000 |
| H | 3.75823600  | -2.90997000 | -2.76875300 |
| H | -3.49113100 | -3.50806200 | -0.30229200 |
| H | -5.06058200 | -2.95519500 | -2.90702000 |
| H | -8.98672000 | -3.22943100 | -1.65901000 |
| H | -7.72008200 | -5.40166900 | -1.78775700 |
| H | -5.68920400 | -4.78069400 | -0.48923400 |
| H | -3.28973300 | -5.32317800 | -2.04153100 |
| H | -1.31928100 | -4.76812900 | -0.64093800 |
| H | 1.11715400  | -5.32185800 | -1.70803400 |
| H | 3.04925700  | -4.64720800 | -0.34240300 |
| H | -8.01736900 | -1.05560100 | 0.30073000  |
| H | -9.02754800 | 1.70357500  | -0.59263000 |
| H | -8.10408900 | 3.83432900  | 1.40526500  |
| H | -7.38296300 | 5.78385300  | -0.87753000 |
| H | -5.37186600 | 6.34304400  | 0.47944500  |
| H | -3.42526000 | 6.34465500  | 0.56996000  |
| H | -1.44127100 | 5.29715000  | 1.62023100  |
| H | 0.98886300  | 6.30751300  | 0.87320300  |
| H | 2.94731600  | 5.17953500  | 1.83637000  |
| H | -5.73536700 | -2.27423900 | 0.03633900  |
| H | -5.04988000 | -0.45245600 | -2.37192700 |
| H | -5.76022800 | 0.19485500  | 0.57166600  |
| H | -5.07344200 | 2.03710500  | -1.82006000 |

|   |             |             |             |
|---|-------------|-------------|-------------|
| H | -5.79535800 | 2.65793400  | 1.12706500  |
| H | -5.13548700 | 4.53037100  | -1.24846400 |
| H | -3.59636800 | 3.96014700  | 1.36917100  |
| H | -7.25078900 | 0.76230300  | -2.08243900 |
| H | -7.28823600 | 3.24738500  | -1.52028700 |
| H | -7.23399700 | -1.72973700 | -2.61602000 |
| N | 2.87852500  | -4.41437900 | 3.83602000  |
| H | 2.75064300  | -5.37070800 | 3.50477000  |
| C | 1.56488400  | -3.79510300 | 3.92466100  |
| H | 1.64367100  | -2.83951700 | 4.45167800  |
| C | 1.03196700  | -3.55758900 | 2.49900700  |
| C | 0.55012600  | -4.67145500 | 4.64530300  |
| H | 1.75022800  | -2.90684600 | 1.98605200  |
| H | 1.03996100  | -4.52387300 | 1.97785000  |
| C | -0.34562500 | -2.97535800 | 2.47422500  |
| O | 0.41329200  | -5.85196700 | 4.42672300  |
| C | -1.51984000 | -3.64409900 | 2.25467500  |
| C | -0.70591900 | -1.61289600 | 2.76945400  |
| H | -1.67955400 | -4.68669000 | 2.01234700  |
| N | -2.58612300 | -2.78177700 | 2.39117400  |
| C | -2.11684200 | -1.52793500 | 2.70592600  |
| C | 0.03374000  | -0.45784300 | 3.07255500  |
| H | -3.55111000 | -3.01614700 | 2.21552000  |
| C | -2.80428100 | -0.33332900 | 2.94625100  |
| C | -0.64096300 | 0.72791700  | 3.30780100  |
| H | 1.12009200  | -0.49520200 | 3.11426300  |
| H | -3.88828400 | -0.28369200 | 2.88795100  |
| C | -2.04832700 | 0.78693500  | 3.24828100  |
| H | -0.08185100 | 1.62983500  | 3.53882700  |
| H | -2.54999400 | 1.73249400  | 3.43377500  |
| H | 3.29252700  | -4.48943600 | 4.76284900  |
| O | -0.19880800 | -4.00035300 | 5.53305200  |
| H | -0.84207600 | -4.63512000 | 5.89604100  |

#### Graphane-Tyr

|   |             |            |             |
|---|-------------|------------|-------------|
| C | -4.91205900 | 1.62884200 | -0.95554400 |
| C | -5.66252400 | 2.81085000 | -0.29614900 |
| C | -3.46171400 | 1.55264100 | -0.43414400 |
| C | -7.85474900 | 1.56637200 | -0.55328900 |
| C | -7.11599400 | 2.88793200 | -0.82726400 |
| C | -4.92661800 | 4.14426600 | -0.57158600 |
| C | -2.73019300 | 2.87697600 | -0.70010300 |
| C | -7.87384800 | 4.06064000 | -0.17478500 |
| C | -5.69179500 | 5.30358800 | 0.10217400  |
| C | -3.47296600 | 4.06738200 | -0.06248200 |
| C | -1.28077600 | 2.79677100 | -0.19022900 |
| C | -7.13653300 | 5.38470300 | -0.40480800 |
| H | -5.68618800 | 5.16887700 | 1.20042100  |
| C | -2.71726800 | 5.37221700 | -0.34594200 |
| C | -0.52743100 | 1.60161100 | -0.79909700 |

|   |             |             |             |
|---|-------------|-------------|-------------|
| C | -0.51667500 | 4.11158300  | -0.41438500 |
| H | -7.66981700 | 6.20732900  | 0.10690000  |
| C | -1.28745700 | 5.29724500  | 0.17198100  |
| H | -2.69758700 | 5.55387700  | -1.42963700 |
| C | 0.91684900  | 1.52139100  | -0.27590300 |
| C | 0.91154700  | 4.01977100  | 0.14216000  |
| H | -0.77602000 | 6.23653200  | -0.05704200 |
| C | 1.67469700  | 2.84221200  | -0.48794000 |
| C | 1.68369400  | 5.33189400  | -0.02711400 |
| C | 3.12034400  | 2.75824400  | 0.03235700  |
| C | 3.11477400  | 5.23370100  | 0.48365500  |
| H | 1.69091600  | 5.60322100  | -1.09432000 |
| C | 3.85373200  | 1.56765100  | -0.60284400 |
| C | 3.86598600  | 4.08600400  | -0.20417300 |
| H | 3.63009600  | 6.18940000  | 0.32737500  |
| C | 5.29889300  | 1.48694800  | -0.06850000 |
| C | 5.32392800  | 4.00429600  | 0.29122800  |
| C | 6.05408600  | 2.80555100  | -0.36095900 |
| C | 6.08830900  | 5.30765200  | -0.02676800 |
| C | 7.50822100  | 2.72553900  | 0.16847900  |
| H | 5.57555700  | 6.17144400  | 0.43764100  |
| C | 7.53722000  | 5.23923700  | 0.46970100  |
| C | 8.26789700  | 4.03263200  | -0.13058900 |
| C | 8.24242500  | 1.53004600  | -0.46276700 |
| H | 8.06988900  | 6.17206400  | 0.20642200  |
| C | 8.25848200  | -3.46856700 | -1.16458600 |
| C | 8.23926000  | -0.96995300 | -0.80647800 |
| C | 7.52083800  | -4.78998900 | -0.92056700 |
| C | 7.49946600  | -2.28938500 | -0.52575400 |
| C | 7.49348300  | 0.21748700  | -0.17328100 |
| C | 6.07621500  | -4.71507000 | -1.42854700 |
| H | 8.05430800  | -5.61821600 | -1.42328100 |
| C | 6.04805500  | -2.21681500 | -1.06357100 |
| C | 6.04424500  | 0.29443000  | -0.71269300 |
| C | 5.31051300  | -3.54614500 | -0.77205900 |
| H | 6.07081100  | -4.59736100 | -2.52872100 |
| C | 5.29469400  | -1.02717600 | -0.42194600 |
| C | 3.85753300  | -3.48038900 | -1.28487900 |
| C | 3.85091700  | -0.95215100 | -0.96097100 |
| C | 3.09665900  | -4.77319000 | -0.96174800 |
| C | 3.11208300  | -2.27073600 | -0.68810900 |
| C | 3.10782800  | 0.24713800  | -0.35036700 |
| C | 1.67125800  | -4.71293200 | -1.49466600 |
| H | 3.61324700  | -5.64683600 | -1.37782700 |
| C | 1.66809500  | -2.19859900 | -1.21559100 |
| C | 1.66891100  | 0.32543900  | -0.88138100 |
| C | 0.90125500  | -3.50536800 | -0.95368600 |
| H | 1.69062100  | -4.66076400 | -2.59441800 |
| C | 0.91263100  | -0.99020400 | -0.63739700 |
| C | -0.52804200 | -3.42852700 | -1.50925300 |



|   |             |             |             |
|---|-------------|-------------|-------------|
| C | -0.53111600 | -0.91474700 | -1.16209800 |
| C | -1.29901900 | -4.73326600 | -1.28807400 |
| C | -1.28552400 | -2.23120600 | -0.91086100 |
| C | -1.27866100 | 0.28310200  | -0.55502600 |
| C | -2.73237200 | -4.65075100 | -1.79408400 |
| H | -0.79386000 | -5.56422200 | -1.78930100 |
| C | -2.73734300 | -2.16092900 | -1.41503500 |
| C | -2.72526600 | 0.35896900  | -1.06468500 |
| C | -3.47903400 | -3.48277700 | -1.13699700 |
| H | -2.72267300 | -4.50811600 | -2.88381800 |
| C | -3.46428600 | -0.96099500 | -0.78998500 |
| C | -4.93900500 | -3.41284800 | -1.62795500 |
| C | -4.91633500 | -0.88873300 | -1.30632800 |
| C | -5.70129800 | -4.71137100 | -1.28672400 |
| C | -5.66742400 | -2.20477200 | -0.99178500 |
| C | -5.65734600 | 0.30566400  | -0.66067800 |
| C | -7.15095900 | -4.65148300 | -1.78211000 |
| H | -5.18911800 | -5.58263700 | -1.73743600 |
| C | -7.12397400 | -2.13286800 | -1.51570600 |
| C | -7.11024000 | 0.38015700  | -1.19072800 |
| C | -7.88156100 | -3.43697500 | -1.19801600 |
| H | -7.17046700 | -4.60797300 | -2.88793900 |
| C | -7.85735800 | -0.93202700 | -0.89361000 |
| H | 8.37741800  | 4.16657000  | -1.22335000 |
| H | 8.34434200  | 1.67805400  | -1.55400300 |
| H | 9.26914000  | -1.02310100 | -0.40875600 |
| H | 9.28262700  | -3.52575900 | -0.75273200 |
| H | -7.98903600 | -3.55606400 | -0.10325600 |
| H | -8.88849700 | -0.87534600 | -1.28736600 |
| H | -7.95900300 | 1.40827200  | 0.53647000  |
| H | -8.89855200 | 4.12224000  | -0.58422400 |
| H | 0.85012600  | -1.13304800 | 0.45757900  |
| H | 0.85799500  | 1.34816100  | 0.81355200  |
| H | -1.32034500 | 0.12367500  | 0.53718000  |
| H | 1.72573500  | 0.48240200  | -1.97525400 |
| H | -0.48287800 | -0.76182500 | -2.25679800 |
| H | -0.47928800 | 1.76410300  | -1.89242000 |
| H | 1.72643200  | -2.06270900 | -2.31221800 |
| H | 3.05459200  | -2.41251600 | 0.40623100  |
| H | 3.88588300  | -0.80463900 | -2.06025700 |
| H | 3.04431400  | 0.09085200  | 0.74121300  |
| H | 3.88546200  | 1.73315200  | -1.69970500 |
| H | 3.06739800  | 2.58576900  | 1.12179200  |
| H | 1.72804000  | 3.02874800  | -1.57731200 |
| H | 0.83286300  | 3.81460700  | 1.22662600  |
| H | -0.43954100 | 4.26863500  | -1.50525300 |
| H | -1.33411600 | 2.62713900  | 0.90198300  |
| H | 0.82196800  | -3.62517300 | 0.14207200  |
| H | -0.45497800 | -3.26178700 | -2.59918500 |
| H | -1.32796400 | -2.37736900 | 0.18587300  |

|   |             |             |             |
|---|-------------|-------------|-------------|
| H | -2.70047200 | -2.01232500 | -2.50834400 |
| H | -3.47968100 | -1.11067300 | 0.30921300  |
| H | -2.68488600 | 0.51429200  | -2.15702000 |
| H | -3.48179200 | 1.39890500  | 0.66427700  |
| H | -2.68772700 | 3.04161500  | -1.79090500 |
| H | 5.26511500  | 1.33229900  | 1.03628100  |
| H | 6.08629600  | 2.96321500  | -1.46464600 |
| H | 5.31939300  | 3.85932400  | 1.39827900  |
| H | 3.86766600  | 4.27651100  | -1.29604900 |
| H | 6.07336300  | 5.49581800  | -1.11697700 |
| H | 7.55515300  | 5.17982500  | 1.57486800  |
| H | 9.29493700  | 3.97345700  | 0.27355100  |
| H | 7.47643900  | 2.58142600  | 1.27559900  |
| H | 9.27347200  | 1.47028700  | -0.06910200 |
| H | 6.08362400  | 0.44941800  | -1.81672300 |
| H | 7.45623100  | 0.06537100  | 0.93280600  |
| H | 8.34459500  | -0.81627700 | -1.89662100 |
| H | 7.46231800  | -2.45066900 | 0.57879000  |
| H | 6.08632000  | -2.06381000 | -2.16777900 |
| H | 5.25838400  | -1.18143600 | 0.68271400  |
| H | 8.37609800  | -3.30017000 | -2.25173600 |
| H | 7.52950800  | -5.03334200 | 0.15923400  |
| H | 5.55895200  | -5.67146000 | -1.22276300 |
| H | 5.29546000  | -3.71088800 | 0.33193500  |
| H | 3.87099900  | -3.35229900 | -2.38569700 |
| H | -3.47496900 | -3.64165800 | -0.03935000 |
| H | -4.93859000 | -3.28546600 | -2.73724800 |
| H | -8.90923800 | -3.38428700 | -1.60123700 |
| H | -7.68236800 | -5.58079900 | -1.50432500 |
| H | -5.68424500 | -4.88144800 | -0.19346600 |
| H | -3.24728900 | -5.60105200 | -1.60651100 |
| H | -1.30116400 | -4.96694600 | -0.21110600 |
| H | 1.15547200  | -5.64098300 | -1.23217100 |
| H | 3.06897100  | -4.91512800 | 0.12846000  |
| H | -7.95883600 | -1.07265000 | 0.19873800  |
| H | -8.88476600 | 1.62108800  | -0.95016100 |
| H | -7.98908600 | 3.88018700  | 0.91078100  |
| H | -7.14488600 | 5.63921400  | -1.48199800 |
| H | -5.17549500 | 6.26299000  | -0.09026400 |
| H | -3.23061200 | 6.22986000  | 0.10614100  |
| H | -1.29812900 | 5.20489400  | 1.27104800  |
| H | 1.17478100  | 6.14436300  | 0.49993900  |
| H | 3.10072400  | 5.05883100  | 1.56873700  |
| H | -5.69487700 | -2.34634100 | 0.11425800  |
| H | -4.89659500 | -0.74283600 | -2.41252000 |
| H | -5.68933500 | 0.15262000  | 0.44405900  |
| H | -4.88885200 | 1.78960600  | -2.05946400 |
| H | -5.69528100 | 2.64353100  | 0.80667000  |
| H | -4.91270800 | 4.32440600  | -1.67329600 |
| H | -3.48492800 | 3.89667200  | 1.03291600  |

|   |             |             |             |
|---|-------------|-------------|-------------|
| H | -7.08010800 | 0.53095900  | -2.29702100 |
| H | -7.08346100 | 3.05834200  | -1.93043100 |
| H | -7.09720200 | -2.00092600 | -2.62433800 |
| N | 0.84701100  | -4.75155900 | 4.19039600  |
| H | 0.18817400  | -5.38461900 | 3.73857900  |
| C | 0.23525300  | -3.43201600 | 4.25613900  |
| H | 0.84594100  | -2.77522900 | 4.88334100  |
| C | 0.00976300  | -2.76625500 | 2.87747200  |
| C | -1.12185400 | -3.60668200 | 4.91057000  |
| H | 0.99127700  | -2.65860800 | 2.39689700  |
| H | -0.57851700 | -3.46560400 | 2.26835700  |
| C | -0.68321100 | -1.42985900 | 2.95227300  |
| O | -1.93677900 | -4.41445400 | 4.53319000  |
| C | 0.04439100  | -0.24875900 | 3.09835100  |
| C | -2.08041200 | -1.34301900 | 2.91736500  |
| H | 1.13202000  | -0.28803200 | 3.12135600  |
| C | -0.59199700 | 0.98602000  | 3.18867700  |
| C | -2.73097200 | -0.11923000 | 3.00684300  |
| H | -2.66593700 | -2.25444400 | 2.80596400  |
| H | -0.00748900 | 1.89950300  | 3.28246200  |
| C | -1.98316300 | 1.05213700  | 3.13346500  |
| H | -3.81307600 | -0.04670900 | 2.95636000  |
| H | 1.67977100  | -4.71461200 | 3.60637000  |
| O | -1.34630000 | -2.74735000 | 5.91116800  |
| H | -2.25584000 | -2.90787400 | 6.22053400  |
| O | -2.66515400 | 2.23116700  | 3.17856300  |
| H | -2.03444600 | 2.96611100  | 3.17503500  |

#### Graphane-G

|   |             |            |             |
|---|-------------|------------|-------------|
| C | -5.21668500 | 1.37342700 | -0.62309200 |
| C | -5.93040500 | 2.61827300 | -0.04416400 |
| C | -3.73050300 | 1.36301700 | -0.20967300 |
| C | -8.11710700 | 1.33755400 | 0.01413500  |
| C | -7.42297100 | 2.62594600 | -0.46073200 |
| C | -5.24052600 | 3.91470100 | -0.53310400 |
| C | -3.03731300 | 2.65173700 | -0.67436700 |
| C | -8.14288300 | 3.86003000 | 0.11695000  |
| C | -5.96481600 | 5.14097700 | 0.06301600  |
| C | -3.74820500 | 3.91175800 | -0.14508100 |
| C | -1.55679000 | 2.64268800 | -0.25701300 |
| C | -7.44843500 | 5.15382500 | -0.32343400 |
| H | -5.86371300 | 5.13944500 | 1.16453900  |
| C | -3.03565500 | 5.16671700 | -0.66516000 |
| C | -0.82460500 | 1.38794300 | -0.76269500 |
| C | -0.82114800 | 3.92141600 | -0.68922800 |
| H | -7.94973900 | 6.02632700 | 0.13537400  |
| C | -1.57400000 | 5.17618100 | -0.23740600 |
| H | -3.09260000 | 5.18686200 | -1.76236600 |
| C | 0.64238600  | 1.37344400 | -0.30082800 |
| C | 0.62857300  | 3.90562500 | -0.18202600 |

|   |             |             |             |
|---|-------------|-------------|-------------|
| H | -1.09134400 | 6.07168100  | -0.63949700 |
| C | 1.38149400  | 2.66469700  | -0.68907300 |
| C | 1.38337700  | 5.19039300  | -0.53240800 |
| C | 2.83908300  | 2.64664300  | -0.19522200 |
| C | 2.82402300  | 5.16067700  | -0.03899300 |
| H | 1.36849500  | 5.32664600  | -1.62518400 |
| C | 3.56688900  | 1.39847800  | -0.71645900 |
| C | 3.57116600  | 3.94164300  | -0.59637800 |
| H | 3.33092800  | 6.09323100  | -0.31685500 |
| C | 5.02060200  | 1.38089100  | -0.20135800 |
| C | 5.03503100  | 3.92175800  | -0.11229400 |
| C | 5.76466600  | 2.66375100  | -0.64227000 |
| C | 5.78978800  | 5.18758500  | -0.57289300 |
| C | 7.22448400  | 2.64567900  | -0.12292900 |
| H | 5.27724900  | 6.09307900  | -0.19663300 |
| C | 7.24320500  | 5.17700100  | -0.08437600 |
| C | 7.97502200  | 3.91782100  | -0.56325700 |
| C | 7.95882600  | 1.39416300  | -0.63441600 |
| H | 7.76910000  | 6.07993000  | -0.44568000 |
| C | 7.99187200  | -3.65027000 | -0.80992900 |
| C | 7.96456400  | -1.12791100 | -0.71598200 |
| C | 7.26464400  | -4.94180500 | -0.41836000 |
| C | 7.23499900  | -2.41310800 | -0.28817400 |
| C | 7.21954900  | 0.11610300  | -0.20074100 |
| C | 5.81276700  | -4.92564400 | -0.91128200 |
| H | 7.79566000  | -5.81618100 | -0.83784100 |
| C | 5.77595500  | -2.40255500 | -0.80984400 |
| C | 5.76338100  | 0.13005100  | -0.72652200 |
| C | 5.05142400  | -3.69702200 | -0.36812900 |
| H | 5.79200900  | -4.92121900 | -2.01738500 |
| C | 5.02565600  | -1.15559900 | -0.28438300 |
| C | 3.58937400  | -3.69070900 | -0.85714500 |
| C | 3.57361200  | -1.14282400 | -0.80298100 |
| C | 2.84492900  | -4.94621500 | -0.38301100 |
| C | 2.85074700  | -2.42826900 | -0.37336300 |
| C | 2.83739700  | 0.11036800  | -0.30304300 |
| C | 1.40535500  | -4.94932500 | -0.88011200 |
| H | 3.35719600  | -5.85746100 | -0.71612400 |
| C | 1.39233200  | -2.42034400 | -0.86506000 |
| C | 1.38367100  | 0.12366900  | -0.79986600 |
| C | 0.64324100  | -3.69514900 | -0.44510700 |
| H | 1.39578800  | -5.01028100 | -1.97953300 |
| C | 0.64667400  | -1.16146300 | -0.39296900 |
| C | -0.80597900 | -3.68234000 | -0.95436700 |
| C | -0.82008000 | -1.15024500 | -0.85688700 |
| C | -1.55169800 | -4.96652900 | -0.58052800 |
| C | -1.54692100 | -2.43829600 | -0.43702900 |
| C | -1.54737500 | 0.10053500  | -0.33835400 |
| C | -3.01305700 | -4.93704600 | -1.00787700 |
| H | -1.06572500 | -5.83422000 | -1.03684200 |

|   |             |             |             |
|---|-------------|-------------|-------------|
| C | -3.02695100 | -2.42612900 | -0.85536600 |
| C | -3.02445400 | 0.11177600  | -0.75586600 |
| C | -3.73052400 | -3.72110900 | -0.40791500 |
| H | -3.06958900 | -4.88583100 | -2.10418200 |
| C | -3.72445700 | -1.17727900 | -0.29672500 |
| C | -5.22368200 | -3.70600200 | -0.79301300 |
| C | -5.21090800 | -1.16435000 | -0.71008900 |
| C | -5.94186300 | -4.97294900 | -0.28031000 |
| C | -5.91899900 | -2.44879600 | -0.21698800 |
| C | -5.91844800 | 0.08463200  | -0.13376600 |
| C | -7.42571500 | -4.96646900 | -0.66638200 |
| H | -5.45401800 | -5.87734900 | -0.69132000 |
| C | -7.41176800 | -2.43495200 | -0.63245200 |
| C | -7.40841300 | 0.09576400  | -0.55462100 |
| C | -8.12582900 | -3.70856900 | -0.13938300 |
| H | -7.52902200 | -5.02226400 | -1.76717200 |
| C | -8.11145200 | -1.18482000 | -0.07123000 |
| H | 8.07365300  | 3.93767800  | -1.66481900 |
| H | 8.04742500  | 1.42765800  | -1.73600500 |
| H | 8.99902400  | -1.13457400 | -0.32742400 |
| H | 9.02128600  | -3.65950100 | -0.40795200 |
| H | -8.14825400 | -3.72730200 | 0.96643100  |
| H | -9.17127700 | -1.17353300 | -0.38461100 |
| H | -8.12989500 | 1.29632000  | 1.11908300  |
| H | -9.19882300 | 3.86812500  | -0.20961900 |
| H | 0.63108400  | -1.18734600 | 0.71139100  |
| H | 0.63597800  | 1.32215200  | 0.80163100  |
| H | -1.52299200 | 0.05364000  | 0.76662800  |
| H | 1.40600000  | 0.16250600  | -1.90584300 |
| H | -0.82444800 | -1.10705100 | -1.96212600 |
| H | -0.83099500 | 1.42614700  | -1.86798100 |
| H | 1.41840500  | -2.40031900 | -1.97128700 |
| H | 2.83362700  | -2.44546700 | 0.72966500  |
| H | 3.58630500  | -1.11308200 | -1.91316000 |
| H | 2.81524900  | 0.07546400  | 0.79856400  |
| H | 3.57800400  | 1.44635700  | -1.82603400 |
| H | 2.81059800  | 2.58838100  | 0.90615000  |
| H | 1.40590600  | 2.72049800  | -1.79441600 |
| H | 0.59068700  | 3.83154800  | 0.92036800  |
| H | -0.79091700 | 3.92702500  | -1.79354300 |
| H | -1.53294400 | 2.61192300  | 0.85069700  |
| H | 0.59342000  | -3.69875400 | 0.65926200  |
| H | -0.77553100 | -3.61755600 | -2.05717000 |
| H | -1.52695300 | -2.47931200 | 0.66720500  |
| H | -3.06488000 | -2.38004500 | -1.95749300 |
| H | -3.65713900 | -1.22037200 | 0.81085200  |
| H | -3.05957500 | 0.15128000  | -1.85808900 |
| H | -3.66880700 | 1.32597800  | 0.89955300  |
| H | -3.06977300 | 2.68069000  | -1.77696800 |
| H | 5.00166900  | 1.34188400  | 0.91577800  |

|   |             |             |             |
|---|-------------|-------------|-------------|
| H | 5.78399400  | 2.70310700  | -1.75642800 |
| H | 5.04191600  | 3.89220300  | 1.00443800  |
| H | 3.55972000  | 4.00481500  | -1.70346100 |
| H | 5.76472600  | 5.25918300  | -1.67644300 |
| H | 7.26902000  | 5.22981700  | 1.02112300  |
| H | 9.00547900  | 3.90488800  | -0.16419800 |
| H | 7.20331500  | 2.61615700  | 0.99367100  |
| H | 8.99374400  | 1.37999500  | -0.24734000 |
| H | 5.78696300  | 0.16673900  | -1.84082300 |
| H | 7.19450700  | 0.07976000  | 0.91598800  |
| H | 8.05451900  | -1.08879600 | -1.81728700 |
| H | 7.21217300  | -2.45649400 | 0.82797200  |
| H | 5.79719800  | -2.36604400 | -1.92414800 |
| H | 5.00384500  | -1.19058800 | 0.83378600  |
| H | 8.09372800  | -3.59614800 | -1.91009400 |
| H | 7.28798200  | -5.06813200 | 0.68113500  |
| H | 5.30341800  | -5.85713500 | -0.60049400 |
| H | 5.05687800  | -3.74188900 | 0.74795200  |
| H | 3.58012500  | -3.68198000 | -1.96568600 |
| H | -3.64532100 | -3.77993800 | 0.69696800  |
| H | -5.30614800 | -3.68053000 | -1.90631200 |
| H | -9.18185900 | -3.69935100 | -0.46559800 |
| H | -7.92297900 | -5.87025700 | -0.26791600 |
| H | -5.84021900 | -5.04442500 | 0.81867600  |
| H | -3.50685200 | -5.87119400 | -0.71196900 |
| H | -1.48938300 | -5.10157400 | 0.51111100  |
| H | 0.90323900  | -5.84879300 | -0.51095500 |
| H | 2.84727100  | -4.97215700 | 0.71715000  |
| H | -8.12370100 | -1.21862500 | 1.03398300  |
| H | -9.17683600 | 1.34293200  | -0.29980500 |
| H | -8.16568200 | 3.80404200  | 1.22153600  |
| H | -7.55197500 | 5.28387800  | -1.41788900 |
| H | -5.48095000 | 6.07335100  | -0.28565100 |
| H | -3.53273300 | 6.07738600  | -0.30862300 |
| H | -1.51411600 | 5.25134700  | 0.86039500  |
| H | 0.87843000  | 6.05928200  | -0.09932600 |
| H | 2.82784300  | 5.11526500  | 1.05908200  |
| H | -5.86052100 | -2.48567400 | 0.89600400  |
| H | -5.27220900 | -1.12776000 | -1.82403700 |
| H | -5.86354500 | 0.04624900  | 0.97957900  |
| H | -5.27770000 | 1.41265100  | -1.73705400 |
| H | -5.87330800 | 2.58010400  | 1.06875800  |
| H | -5.32159700 | 3.96398000  | -1.64571400 |
| H | -3.66626900 | 3.90075300  | 0.96125300  |
| H | -7.46473000 | 0.13338000  | -1.66974100 |
| H | -7.48083800 | 2.67336200  | -1.57518500 |
| H | -7.47022600 | -2.40702800 | -1.74752600 |
| H | 0.33192300  | 3.08695600  | 3.36446800  |
| C | 0.43779700  | 2.01184100  | 3.31346700  |
| N | -0.66169900 | 1.18065200  | 3.27370100  |

|   |             |             |            |
|---|-------------|-------------|------------|
| N | 1.56643100  | 1.35959100  | 3.28189100 |
| C | -0.18755100 | -0.09680500 | 3.21413700 |
| H | -1.63678100 | 1.44632300  | 3.26330000 |
| C | 1.19470000  | 0.03570200  | 3.22032900 |
| N | -0.94394900 | -1.22536100 | 3.17212300 |
| C | 2.00096500  | -1.15623000 | 3.13257700 |
| C | -0.21569800 | -2.30735500 | 3.11960100 |
| N | 1.15376800  | -2.30619700 | 3.10456200 |
| O | 3.20271000  | -1.29733100 | 3.05771300 |
| N | -0.82766200 | -3.53168800 | 3.01525200 |
| H | 1.65580600  | -3.17623800 | 2.96066400 |
| H | -0.36459300 | -4.32555400 | 3.43660700 |
| H | -1.82452600 | -3.48976500 | 3.18528100 |

#### Graphane-A

|   |             |            |             |
|---|-------------|------------|-------------|
| C | -5.15439300 | 1.33008500 | -0.66953800 |
| C | -5.87624200 | 2.58935200 | -0.13336800 |
| C | -3.67903200 | 1.32145700 | -0.21816600 |
| C | -8.07123000 | 1.32124800 | -0.10991200 |
| C | -7.35708300 | 2.59678200 | -0.58977900 |
| C | -5.16632800 | 3.87305700 | -0.62719000 |
| C | -2.96821700 | 2.59745700 | -0.69124900 |
| C | -8.08543700 | 3.84470500 | -0.05388200 |
| C | -5.89975500 | 5.11301600 | -0.07194400 |
| C | -3.68487000 | 3.86909500 | -0.19838700 |
| C | -1.49720600 | 2.58758700 | -0.24015500 |
| C | -7.37232100 | 5.12687000 | -0.49842700 |
| H | -5.82795400 | 5.12913000 | 1.03202200  |
| C | -2.95430500 | 5.11262000 | -0.72154900 |
| C | -0.76503300 | 1.32180800 | -0.71777800 |
| C | -0.75032800 | 3.85500000 | -0.68735000 |
| H | -7.88074700 | 6.00982300 | -0.06837000 |
| C | -1.50141400 | 5.12074500 | -0.26475200 |
| H | -2.98831700 | 5.11802300 | -1.82004500 |
| C | 0.69827200  | 1.30748300 | -0.24307200 |
| C | 0.69422700  | 3.84123600 | -0.16557600 |
| H | -1.00716200 | 6.00850200 | -0.67073300 |
| C | 1.44316800  | 2.58927900 | -0.65101100 |
| C | 1.45714500  | 5.11865900 | -0.52603500 |
| C | 2.90300100  | 2.57332100 | -0.16430500 |
| C | 2.89863800  | 5.08727300 | -0.03502600 |
| H | 1.44295200  | 5.24691400 | -1.61954700 |
| C | 3.62265500  | 1.31107500 | -0.66218900 |
| C | 3.63882000  | 3.86026800 | -0.58336700 |
| H | 3.41039800  | 6.01457600 | -0.32051000 |
| C | 5.08272400  | 1.29721600 | -0.16262300 |
| C | 5.10768500  | 3.84036100 | -0.11322100 |
| C | 5.82539600  | 2.57090400 | -0.63208700 |
| C | 5.86146500  | 5.09543200 | -0.60375300 |
| C | 7.29315000  | 2.55437800 | -0.13553700 |

|   |             |             |             |
|---|-------------|-------------|-------------|
| H | 5.35775400  | 6.00946100  | -0.23591200 |
| C | 7.32173100  | 5.08651900  | -0.13673400 |
| C | 8.04114400  | 3.81690400  | -0.60629500 |
| C | 8.01379300  | 1.29286100  | -0.64169600 |
| H | 7.84560700  | 5.98116700  | -0.52198800 |
| C | 8.02350400  | -3.75491700 | -0.75031500 |
| C | 8.00775300  | -1.23064000 | -0.69229800 |
| C | 7.30041800  | -5.03678100 | -0.32084900 |
| C | 7.28232900  | -2.50710200 | -0.23206000 |
| C | 7.27781200  | 0.02303200  | -0.17952100 |
| C | 5.83771400  | -5.02379400 | -0.78031500 |
| H | 7.81852300  | -5.92016500 | -0.73804100 |
| C | 5.81339100  | -2.49985800 | -0.72527900 |
| C | 5.81294500  | 0.03554700  | -0.68056600 |
| C | 5.09207600  | -3.78237100 | -0.24480700 |
| H | 5.79074500  | -5.04280100 | -1.88544400 |
| C | 5.07705000  | -1.24064000 | -0.20944100 |
| C | 3.62006500  | -3.78105700 | -0.70503500 |
| C | 3.61669600  | -1.23297500 | -0.70748600 |
| C | 2.87805600  | -5.01897300 | -0.18413800 |
| C | 2.89349600  | -2.50451000 | -0.24084100 |
| C | 2.88995500  | 0.03285400  | -0.22520700 |
| C | 1.43325300  | -5.03114000 | -0.66629600 |
| H | 3.38310300  | -5.94104500 | -0.49787700 |
| C | 1.43142100  | -2.50127500 | -0.72205500 |
| C | 1.43387500  | 0.04391600  | -0.71452700 |
| C | 0.67782700  | -3.76141600 | -0.26506500 |
| H | 1.41163200  | -5.12962500 | -1.76315500 |
| C | 0.69314300  | -1.22854900 | -0.27587600 |
| C | -0.76746200 | -3.75600500 | -0.78557900 |
| C | -0.77048800 | -1.22071000 | -0.74979600 |
| C | -1.52438100 | -5.02441300 | -0.38187600 |
| C | -1.50859800 | -2.49602300 | -0.30892300 |
| C | -1.49868000 | 0.04673500  | -0.27489900 |
| C | -2.97759700 | -5.00297000 | -0.83694100 |
| H | -1.03511200 | -5.90803500 | -0.80228300 |
| C | -2.97995700 | -2.48744500 | -0.75880900 |
| C | -2.96705100 | 0.05620900  | -0.72367800 |
| C | -3.70242300 | -3.76575000 | -0.29238100 |
| H | -3.01372700 | -4.98858900 | -1.93529300 |
| C | -3.68525000 | -1.21975200 | -0.25662600 |
| C | -5.18446200 | -3.75364100 | -0.71877200 |
| C | -5.16162000 | -1.21003000 | -0.70337300 |
| C | -5.92311500 | -5.00273100 | -0.19202400 |
| C | -5.88871200 | -2.47840700 | -0.19624100 |
| C | -5.87623500 | 0.05527100  | -0.17310200 |
| C | -7.39548900 | -5.00035100 | -0.61934100 |
| H | -5.42861800 | -5.92047600 | -0.56399100 |
| C | -7.36956200 | -2.46849700 | -0.65279600 |
| C | -7.35446100 | 0.06461900  | -0.63400500 |



|   |             |             |             |
|---|-------------|-------------|-------------|
| C | -8.10356500 | -3.72552000 | -0.14664400 |
| H | -7.46880600 | -5.08661000 | -1.72050700 |
| C | -8.07785700 | -1.20150800 | -0.14263600 |
| H | 8.12392400  | 3.81947700  | -1.70960400 |
| H | 8.08498900  | 1.31111900  | -1.74517700 |
| H | 9.05022700  | -1.23642200 | -0.32549700 |
| H | 9.06181400  | -3.76189600 | -0.37180800 |
| H | -8.15757900 | -3.71486200 | 0.95828200  |
| H | -9.12789300 | -1.19245600 | -0.48778200 |
| H | -8.11512300 | 1.30210800  | 0.99493500  |
| H | -9.13228400 | 3.85219000  | -0.40832100 |
| H | 0.67637600  | -1.23135200 | 0.82807400  |
| H | 0.67720700  | 1.27756000  | 0.86069000  |
| H | -1.49420800 | 0.03735700  | 0.83085700  |
| H | 1.45430500  | 0.05875900  | -1.82092600 |
| H | -0.76414400 | -1.20598400 | -1.85598400 |
| H | -0.75832900 | 1.33716200  | -1.82388300 |
| H | 1.45094800  | -2.50812700 | -1.82892300 |
| H | 2.87761800  | -2.49759600 | 0.86230700  |
| H | 3.61612200  | -1.22404700 | -1.81766700 |
| H | 2.86276300  | 0.00604100  | 0.87810900  |
| H | 3.62533700  | 1.34001100  | -1.77158800 |
| H | 2.87474700  | 2.53976200  | 0.94042200  |
| H | 1.46949700  | 2.62658400  | -1.75657000 |
| H | 0.64147100  | 3.78193800  | 0.93720000  |
| H | -0.70659000 | 3.84332600  | -1.79147500 |
| H | -1.49385900 | 2.57095200  | 0.86603600  |
| H | 0.62519800  | -3.73259200 | 0.83769700  |
| H | -0.72854800 | -3.72208700 | -1.88965900 |
| H | -1.50241600 | -2.51609500 | 0.79713900  |
| H | -2.99075400 | -2.47332100 | -1.86236400 |
| H | -3.64822500 | -1.23444900 | 0.85321800  |
| H | -2.97711700 | 0.07290100  | -1.82701000 |
| H | -3.64326900 | 1.30822300  | 0.89237400  |
| H | -2.97762200 | 2.60680700  | -1.79502000 |
| H | 5.08103900  | 1.27390100  | 0.95278200  |
| H | 5.82884000  | 2.59290800  | -1.74733500 |
| H | 5.12866000  | 3.83109900  | 1.00252400  |
| H | 3.61808300  | 3.90913700  | -1.69034400 |
| H | 5.82105900  | 5.15006500  | -1.70818400 |
| H | 7.36605700  | 5.15926000  | 0.96677400  |
| H | 9.07787400  | 3.80620200  | -0.22324500 |
| H | 7.29135100  | 2.54108400  | 0.98113400  |
| H | 9.05543800  | 1.27971700  | -0.27252800 |
| H | 5.81856600  | 0.05604800  | -1.79581600 |
| H | 7.27366400  | 0.00013800  | 0.93739300  |
| H | 8.07573500  | -1.20773200 | -1.79580400 |
| H | 7.28198900  | -2.53521100 | 0.88462400  |
| H | 5.81289900  | -2.48491600 | -1.84036300 |
| H | 5.07311000  | -1.26113300 | 0.90731000  |

|   |             |             |             |
|---|-------------|-------------|-------------|
| H | 8.10057800  | -3.71981500 | -1.85334000 |
| H | 7.34874800  | -5.14625500 | 0.77965300  |
| H | 5.33145300  | -5.94661600 | -0.43849800 |
| H | 5.11836200  | -3.80838800 | 0.87137600  |
| H | 3.59086400  | -3.79943600 | -1.81330200 |
| H | -3.64817900 | -3.79387900 | 0.81567400  |
| H | -5.23627600 | -3.75813500 | -1.83421100 |
| H | -9.14991800 | -3.72046100 | -0.50281500 |
| H | -7.90798300 | -5.89065800 | -0.20962200 |
| H | -5.85170300 | -5.04571700 | 0.91106200  |
| H | -3.48084900 | -5.92424000 | -0.51832600 |
| H | -1.48191200 | -5.12740400 | 0.71381500  |
| H | 0.93240700  | -5.91492900 | -0.26016000 |
| H | 2.89103900  | -5.01188900 | 0.91521300  |
| H | -8.12400900 | -1.20933000 | 0.96221400  |
| H | -9.12183100 | 1.32595800  | -0.45324200 |
| H | -8.13742300 | 3.80884300  | 1.05067000  |
| H | -7.44586200 | 5.23796800  | -1.59730200 |
| H | -5.40144000 | 6.03691700  | -0.42236200 |
| H | -3.45305100 | 6.03093200  | -0.38771900 |
| H | -1.46235000 | 5.20849300  | 0.83253400  |
| H | 0.95642500  | 5.99307400  | -0.09992100 |
| H | 2.90444000  | 5.05270400  | 1.06427100  |
| H | -5.86238700 | -2.48685200 | 0.91837700  |
| H | -5.19692600 | -1.19982200 | -1.81904500 |
| H | -5.85290200 | 0.04118500  | 0.94172900  |
| H | -5.18688300 | 1.34773800  | -1.78519300 |
| H | -5.84825900 | 2.57224900  | 0.98144900  |
| H | -5.21744100 | 3.90291200  | -1.74209900 |
| H | -3.63138600 | 3.87439200  | 0.90878200  |
| H | -7.38069500 | 0.07913200  | -1.75071600 |
| H | -7.38506700 | 2.62398400  | -1.70599500 |
| H | -7.39740200 | -2.46909300 | -1.76935200 |
| H | 0.74344100  | 3.11446100  | 3.40289100  |
| C | 0.64170100  | 2.03758900  | 3.37577600  |
| N | -0.49177900 | 1.38912100  | 3.34249100  |
| N | 1.74406700  | 1.21535700  | 3.37103200  |
| C | -0.11147700 | 0.06276500  | 3.31429600  |
| C | 1.27496400  | -0.07384900 | 3.32827000  |
| H | 2.71551100  | 1.49229000  | 3.37262300  |
| C | -0.84597400 | -1.14012900 | 3.26949900  |
| N | 1.96940100  | -1.21700500 | 3.30134600  |
| N | -0.18280000 | -2.30172500 | 3.23242700  |
| N | -2.19676800 | -1.14966800 | 3.28050700  |
| C | 1.15908400  | -2.26965800 | 3.25566600  |
| H | -2.66771700 | -2.02280800 | 3.09145800  |
| H | -2.69595000 | -0.28409100 | 3.13423200  |
| H | 1.64489400  | -3.24299000 | 3.22240100  |

## Graphane-T

|   |             |             |             |
|---|-------------|-------------|-------------|
| C | -5.17868500 | 1.43450400  | -0.59278900 |
| C | -5.91989000 | 2.66407000  | -0.01521800 |
| C | -3.70720000 | 1.42290500  | -0.12891300 |
| C | -8.09992500 | 1.37382400  | -0.05971400 |
| C | -7.39522700 | 2.67267700  | -0.48850700 |
| C | -5.21725600 | 3.97383700  | -0.44676600 |
| C | -3.00614500 | 2.72684000  | -0.53592500 |
| C | -8.14411100 | 3.89315000  | 0.08154000  |
| C | -5.97310200 | 5.18374100  | 0.14338400  |
| C | -3.74374100 | 3.96508200  | 0.00884700  |
| C | -1.54122100 | 2.70966700  | -0.06611200 |
| C | -7.43881500 | 5.19789100  | -0.30600000 |
| H | -5.91871600 | 5.15799800  | 1.24818900  |
| C | -3.01779900 | 5.24170500  | -0.43430300 |
| C | -0.79106600 | 1.48093500  | -0.60814700 |
| C | -0.80258400 | 4.00756500  | -0.43047500 |
| H | -7.96348600 | 6.05951200  | 0.14700600  |
| C | -1.57407200 | 5.23951600  | 0.05046800  |
| H | -3.03167100 | 5.30561800  | -1.53151900 |
| C | 0.66996900  | 1.45799800  | -0.12517600 |
| C | 0.63527700  | 3.97838500  | 0.11004500  |
| H | -1.08203900 | 6.15353000  | -0.29561700 |
| C | 1.40149300  | 2.76973100  | -0.45259400 |
| C | 1.38473400  | 5.28523500  | -0.16312800 |
| C | 2.86149400  | 2.73978300  | 0.03282500  |
| C | 2.82686200  | 5.23851100  | 0.32508700  |
| H | 1.36822000  | 5.48796800  | -1.24548100 |
| C | 3.59483600  | 1.52156900  | -0.54657000 |
| C | 3.58079500  | 4.05988300  | -0.30455600 |
| H | 3.32724000  | 6.18858000  | 0.10062400  |
| C | 5.05751900  | 1.49214700  | -0.05519000 |
| C | 5.05155800  | 4.02632700  | 0.15929200  |
| C | 5.78224800  | 2.80275600  | -0.44470600 |
| C | 5.78871300  | 5.31990000  | -0.24918000 |
| C | 7.25278100  | 2.77124200  | 0.04267800  |
| H | 5.27590100  | 6.20081400  | 0.18207400  |
| C | 7.25125000  | 5.29738700  | 0.20997000  |
| C | 7.98326700  | 4.07099600  | -0.34684600 |
| C | 7.98546800  | 1.55505800  | -0.55000200 |
| H | 7.76257000  | 6.22221200  | -0.11649000 |
| C | 8.05400500  | -3.47073800 | -1.01485200 |
| C | 8.00920700  | -0.95826400 | -0.77284100 |
| C | 7.35074100  | -4.79020700 | -0.67633000 |
| C | 7.30371300  | -2.27342300 | -0.39955000 |
| C | 7.26845800  | 0.24802900  | -0.16965500 |
| C | 5.88301700  | -4.76079300 | -1.11839000 |
| H | 7.87426000  | -5.63273200 | -1.16575500 |
| C | 5.82967600  | -2.24922700 | -0.87712500 |
| C | 5.79947800  | 0.27612100  | -0.65801100 |

|   |             |             |             |
|---|-------------|-------------|-------------|
| C | 5.12941600  | -3.57200000 | -0.48370600 |
| H | 5.82395300  | -4.69749700 | -2.22149500 |
| C | 5.08332500  | -1.03826500 | -0.26798500 |
| C | 3.65082500  | -3.55833600 | -0.92354100 |
| C | 3.61772400  | -1.01618000 | -0.75152600 |
| C | 2.93590800  | -4.83876700 | -0.47434400 |
| C | 2.91412000  | -2.32513100 | -0.36591800 |
| C | 2.87914400  | 0.20897900  | -0.18927600 |
| C | 1.47730600  | -4.83851800 | -0.91302800 |
| H | 3.44134200  | -5.72888400 | -0.86909400 |
| C | 1.44557100  | -2.31035500 | -0.82740300 |
| C | 1.41985400  | 0.23216400  | -0.66881700 |
| C | 0.71535500  | -3.60185600 | -0.42756900 |
| H | 1.42480600  | -4.87798600 | -2.01236400 |
| C | 0.69612400  | -1.07321800 | -0.30578600 |
| C | -0.74119300 | -3.59462500 | -0.91496700 |
| C | -0.77023900 | -1.05926000 | -0.77223000 |
| C | -1.47473900 | -4.88098800 | -0.52526200 |
| C | -1.48999300 | -2.36126800 | -0.38389800 |
| C | -1.51203600 | 0.17594200  | -0.23773300 |
| C | -2.93265100 | -4.86811300 | -0.96547400 |
| H | -0.98105200 | -5.75050700 | -0.96938300 |
| C | -2.96527500 | -2.35434800 | -0.81999200 |
| C | -2.97954900 | 0.18866100  | -0.68771100 |
| C | -3.66867600 | -3.65439600 | -0.38356400 |
| H | -2.98031300 | -4.83059200 | -2.06313300 |
| C | -3.68172400 | -1.11289800 | -0.26863500 |
| C | -5.15141700 | -3.64744300 | -0.80835800 |
| C | -5.15774200 | -1.10411100 | -0.71725100 |
| C | -5.87570200 | -4.91832200 | -0.31468000 |
| C | -5.87077700 | -2.39578000 | -0.25044900 |
| C | -5.88894500 | 0.13448200  | -0.14767600 |
| C | -7.34754900 | -4.92230200 | -0.74399900 |
| H | -5.36988100 | -5.82060800 | -0.70784500 |
| C | -7.35071800 | -2.38990300 | -0.70998400 |
| C | -7.36441900 | 0.14241100  | -0.61708000 |
| C | -8.07114200 | -3.66855600 | -0.23925400 |
| H | -7.41847900 | -4.98047900 | -1.84703600 |
| C | -8.07569300 | -1.14600300 | -0.16724200 |
| H | 8.05947100  | 4.14832500  | -1.44794700 |
| H | 8.04958000  | 1.64810500  | -1.65026900 |
| H | 9.05464400  | -0.97626100 | -0.41459900 |
| H | 9.09617500  | -3.49283200 | -0.64738700 |
| H | -8.12588600 | -3.68772700 | 0.86564100  |
| H | -9.12409800 | -1.13875100 | -0.51672900 |
| H | -8.15396500 | 1.31720200  | 1.04352800  |
| H | -9.18597700 | 3.90259300  | -0.28694000 |
| H | 0.68569600  | -1.14452600 | 0.79758800  |
| H | 0.64017800  | 1.36874800  | 0.97575600  |
| H | -1.51379000 | 0.11448100  | 0.86490600  |

|   |             |             |             |
|---|-------------|-------------|-------------|
| H | 1.43621700  | 0.31186600  | -1.77217800 |
| H | -0.76750600 | -0.99467500 | -1.87644500 |
| H | -0.77734400 | 1.55708600  | -1.71179600 |
| H | 1.45026100  | -2.25631300 | -1.93270900 |
| H | 2.90654800  | -2.40204300 | 0.73690900  |
| H | 3.60773100  | -0.93651100 | -1.85818400 |
| H | 2.85634700  | 0.11761000  | 0.91230300  |
| H | 3.59100400  | 1.61786400  | -1.65186300 |
| H | 2.83902200  | 2.63673400  | 1.13319600  |
| H | 1.42733200  | 2.87632100  | -1.55371100 |
| H | 0.57379100  | 3.84646900  | 1.20544100  |
| H | -0.74322400 | 4.05943800  | -1.53294700 |
| H | -1.54975600 | 2.62685000  | 1.03602200  |
| H | 0.68412400  | -3.63251500 | 0.67630000  |
| H | -0.72665100 | -3.52708700 | -2.01814300 |
| H | -1.48267800 | -2.43354200 | 0.71898900  |
| H | -2.98681000 | -2.30361100 | -1.92246500 |
| H | -3.64689600 | -1.16988700 | 0.84071000  |
| H | -2.99028700 | 0.24897000  | -1.78961600 |
| H | -3.67875400 | 1.35731200  | 0.97872300  |
| H | -3.00231600 | 2.78968000  | -1.63818200 |
| H | 5.06236700  | 1.39952000  | 1.05634700  |
| H | 5.77903700  | 2.89770400  | -1.55614300 |
| H | 5.07577500  | 3.94381400  | 1.27217500  |
| H | 3.55526700  | 4.17975500  | -1.40610400 |
| H | 5.74156500  | 5.44886700  | -1.34709500 |
| H | 7.30004500  | 5.29671100  | 1.31573600  |
| H | 9.02226600  | 4.04771000  | 0.02942300  |
| H | 7.25734900  | 2.68440800  | 1.15601600  |
| H | 9.02969900  | 1.53086800  | -0.18860800 |
| H | 5.79664100  | 0.36994200  | -1.76978600 |
| H | 7.27461800  | 0.14982900  | 0.94288100  |
| H | 8.06942300  | -0.85701600 | -1.87261000 |
| H | 7.31639200  | -2.38279300 | 0.71172300  |
| H | 5.81812400  | -2.15500600 | -1.98854600 |
| H | 5.09416300  | -1.13450000 | 0.84314500  |
| H | 8.12055700  | -3.35307300 | -2.11303100 |
| H | 7.41383700  | -4.98361700 | 0.41158400  |
| H | 5.39121900  | -5.71319700 | -0.84286500 |
| H | 5.17193000  | -3.68086000 | 0.62643200  |
| H | 3.60535500  | -3.50116600 | -2.02942800 |
| H | -3.60743000 | -3.71062300 | 0.72174600  |
| H | -5.20440500 | -3.62213700 | -1.92331600 |
| H | -9.11689900 | -3.66594800 | -0.59661900 |
| H | -7.84987200 | -5.82871300 | -0.35793500 |
| H | -5.80440100 | -4.98705800 | 0.78742500  |
| H | -3.41985400 | -5.80269600 | -0.66129200 |
| H | -1.41722800 | -4.99785900 | 0.56795200  |
| H | 0.99757000  | -5.74873500 | -0.54205700 |
| H | 2.98586300  | -4.91211000 | 0.62138700  |

|   |             |             |             |
|---|-------------|-------------|-------------|
| H | -8.12568600 | -1.18662900 | 0.93689000  |
| H | -9.14692400 | 1.37857600  | -0.41340200 |
| H | -8.21036200 | 3.81662800  | 1.18329200  |
| H | -7.49622100 | 5.34712500  | -1.40125400 |
| H | -5.47990600 | 6.12562100  | -0.16340800 |
| H | -3.53250000 | 6.13595600  | -0.06152200 |
| H | -1.55570700 | 5.26466600  | 1.15117500  |
| H | 0.87394700  | 6.12225800  | 0.32182800  |
| H | 2.83448000  | 5.13070600  | 1.41900500  |
| H | -5.84519000 | -2.43679500 | 0.86393500  |
| H | -5.19223100 | -1.05868500 | -1.83189100 |
| H | -5.87086100 | 0.08079800  | 0.96652400  |
| H | -5.20286600 | 1.49340700  | -1.70694000 |
| H | -5.90448800 | 2.60160800  | 1.09845800  |
| H | -5.24921900 | 4.04709000  | -1.56020900 |
| H | -3.71027700 | 3.91291600  | 1.11536900  |
| H | -7.38454600 | 0.19030700  | -1.73281900 |
| H | -7.41100000 | 2.73788100  | -1.60323800 |
| H | -7.37637600 | -2.36040300 | -1.82606800 |
| O | -0.76829200 | 1.04243700  | 3.15200400  |
| C | -0.19324200 | -0.02492600 | 3.20200700  |
| N | -0.83183000 | -1.24890100 | 3.13942800  |
| N | 1.18040200  | -0.14245800 | 3.30859100  |
| C | -0.25405100 | -2.52481100 | 3.15739500  |
| H | -1.84115300 | -1.21252200 | 3.03824200  |
| C | 1.84451800  | -1.34862000 | 3.35961700  |
| H | 1.68513000  | 0.73361800  | 3.32038600  |
| C | 1.20624100  | -2.53333300 | 3.30346500  |
| O | -0.94629200 | -3.51763100 | 3.04205400  |
| H | 2.92439900  | -1.27644500 | 3.44382100  |
| C | 1.88463800  | -3.86595400 | 3.37622800  |
| H | 1.59441300  | -4.39927400 | 4.28711800  |
| H | 1.58398100  | -4.49364100 | 2.53179700  |
| H | 2.97216800  | -3.75426000 | 3.36351900  |

#### Graphane-C

|   |             |            |             |
|---|-------------|------------|-------------|
| C | -5.14231900 | 1.40242600 | -0.58358700 |
| C | -5.87277100 | 2.64701600 | -0.02488400 |
| C | -3.66946500 | 1.38798300 | -0.12588500 |
| C | -8.06108600 | 1.37014700 | -0.03798200 |
| C | -7.35032400 | 2.65691500 | -0.49167200 |
| C | -5.16460300 | 3.94449900 | -0.48395600 |
| C | -2.96178800 | 2.68039700 | -0.55882700 |
| C | -8.08846300 | 3.89194200 | 0.06067000  |
| C | -5.90889600 | 5.16988400 | 0.08885700  |
| C | -3.68837100 | 3.93584000 | -0.03941700 |
| C | -1.49516000 | 2.66463500 | -0.09569400 |
| C | -7.37706700 | 5.18527900 | -0.35275700 |
| H | -5.84954700 | 5.16362300 | 1.19353100  |
| C | -2.95584800 | 5.19731500 | -0.51447400 |

|   |             |             |             |
|---|-------------|-------------|-------------|
| C | -0.75221100 | 1.41469400  | -0.59760000 |
| C | -0.74678000 | 3.94928800  | -0.48605200 |
| H | -7.89401400 | 6.05787400  | 0.08806600  |
| C | -1.51007600 | 5.19783500  | -0.03556700 |
| H | -2.97371600 | 5.23538500  | -1.61253400 |
| C | 0.70828900  | 1.39423700  | -0.11309200 |
| C | 0.69160800  | 3.92312400  | 0.05319800  |
| H | -1.01303000 | 6.09939700  | -0.40557300 |
| C | 1.44962200  | 2.69261600  | -0.47165100 |
| C | 1.45025800  | 5.21722800  | -0.25386900 |
| C | 2.90903100  | 2.66664900  | 0.01526300  |
| C | 2.89180700  | 5.17334000  | 0.23588100  |
| H | 1.43513800  | 5.38927700  | -1.34132700 |
| C | 3.63421000  | 1.42757100  | -0.53019100 |
| C | 3.63723300  | 3.97167500  | -0.35965800 |
| H | 3.39833200  | 6.11328700  | -0.01536600 |
| C | 5.09406700  | 1.40298400  | -0.03049300 |
| C | 5.10707800  | 3.94239400  | 0.10634200  |
| C | 5.83031200  | 2.69531000  | -0.45738200 |
| C | 5.85384800  | 5.21727200  | -0.34178100 |
| C | 7.29860100  | 2.66910400  | 0.03716100  |
| H | 5.34655300  | 6.11530600  | 0.05933800  |
| C | 7.31516300  | 5.19938400  | 0.12168000  |
| C | 8.03981200  | 3.95008200  | -0.39230300 |
| C | 8.02475800  | 1.42830300  | -0.51068400 |
| H | 7.83395200  | 6.10924300  | -0.23377000 |
| C | 8.05938700  | -3.61244200 | -0.78800300 |
| C | 8.03136900  | -1.09217100 | -0.64231200 |
| C | 7.34269300  | -4.91261900 | -0.40581100 |
| C | 7.31270600  | -2.38719700 | -0.22580100 |
| C | 7.29568900  | 0.14067700  | -0.08901200 |
| C | 5.87988200  | -4.88976200 | -0.86408400 |
| H | 7.86465200  | -5.77732600 | -0.85672200 |
| C | 5.84344300  | -2.37004700 | -0.71790600 |
| C | 5.83048900  | 0.16261600  | -0.58884500 |
| C | 5.12811700  | -3.67226900 | -0.28413000 |
| H | 5.83274900  | -4.86895900 | -1.96942100 |
| C | 5.10083900  | -1.13234200 | -0.16047700 |
| C | 3.65632100  | -3.66235400 | -0.74654900 |
| C | 3.64024100  | -1.11455700 | -0.65969200 |
| C | 2.91901700  | -4.92165400 | -0.27365600 |
| C | 2.92143300  | -2.40547800 | -0.24237600 |
| C | 2.90698800  | 0.13153400  | -0.13822700 |
| C | 1.47460700  | -4.92191700 | -0.75661400 |
| H | 3.43027300  | -5.82868800 | -0.61923400 |
| C | 1.45854200  | -2.39413800 | -0.72201600 |
| C | 1.45054200  | 0.15038000  | -0.62646900 |
| C | 0.71287300  | -3.67259400 | -0.30645500 |
| H | 1.45494500  | -4.97839800 | -1.85631000 |
| C | 0.71341200  | -1.14005500 | -0.23660800 |

|   |             |             |             |
|---|-------------|-------------|-------------|
| C | -0.73672800 | -3.66018800 | -0.81545700 |
| C | -0.74899800 | -1.12644900 | -0.71582700 |
| C | -1.48356700 | -4.93744000 | -0.42038800 |
| C | -1.48127800 | -2.41481900 | -0.30573300 |
| C | -1.48373300 | 0.12247300  | -0.20354800 |
| C | -2.93767300 | -4.91609300 | -0.87264400 |
| H | -0.99334600 | -5.81446600 | -0.85447500 |
| C | -2.95289900 | -2.40272100 | -0.75368500 |
| C | -2.95000500 | 0.13792800  | -0.65748500 |
| C | -3.66631100 | -3.69227800 | -0.30298800 |
| H | -2.97758800 | -4.88557600 | -1.97111700 |
| C | -3.66140600 | -1.15150400 | -0.21440300 |
| C | -5.14888500 | -3.68011300 | -0.72965700 |
| C | -5.13669800 | -1.13700600 | -0.66691300 |
| C | -5.88116800 | -4.94061700 | -0.22127200 |
| C | -5.85854900 | -2.41767200 | -0.18368900 |
| C | -5.85910700 | 0.11433000  | -0.11456900 |
| C | -7.35447900 | -4.93901300 | -0.64527200 |
| H | -5.38228100 | -5.85019700 | -0.60629000 |
| C | -7.33973900 | -2.40698400 | -0.63835500 |
| C | -7.33607000 | 0.12517800  | -0.57902700 |
| C | -8.06721500 | -3.67506300 | -0.15023700 |
| H | -7.42980400 | -5.00773500 | -1.74730000 |
| C | -8.05396800 | -1.15155100 | -0.10759000 |
| H | 8.12018300  | 3.99064200  | -1.49506300 |
| H | 8.09451900  | 1.48310700  | -1.61312700 |
| H | 9.07407100  | -1.10490400 | -0.27597800 |
| H | 9.09797000  | -3.62817900 | -0.41024000 |
| H | -8.11518000 | -3.68220800 | 0.95521200  |
| H | -9.10432500 | -1.14213800 | -0.45067500 |
| H | -8.11037800 | 1.33095500  | 1.06621600  |
| H | -9.13202000 | 3.90150900  | -0.30342000 |
| H | 0.68973800  | -1.18037400 | 0.86699000  |
| H | 0.68527900  | 1.32294300  | 0.99153900  |
| H | -1.48666000 | 0.06173000  | 0.89922300  |
| H | 1.47093100  | 0.20632600  | -1.73132600 |
| H | -0.73810900 | -1.07955400 | -1.82136400 |
| H | -0.73379100 | 1.46630200  | -1.70215100 |
| H | 1.47960400  | -2.36411200 | -1.82816000 |
| H | 2.89946100  | -2.44331300 | 0.86225900  |
| H | 3.64186600  | -1.06886200 | -1.76832600 |
| H | 2.87620300  | 0.07501100  | 0.96398300  |
| H | 3.63622100  | 1.49520400  | -1.63775500 |
| H | 2.88640100  | 2.59285600  | 1.11754800  |
| H | 1.47628100  | 2.76843100  | -1.57504100 |
| H | 0.63125000  | 3.82592200  | 1.15412100  |
| H | -0.68692000 | 3.97319100  | -1.58882000 |
| H | -1.51019300 | 2.61730600  | 1.01122700  |
| H | 0.66162900  | -3.68959500 | 0.79595300  |
| H | -0.70663400 | -3.60602600 | -1.91965600 |



|   |             |             |             |
|---|-------------|-------------|-------------|
| H | -1.48563400 | -2.46380300 | 0.79632600  |
| H | -2.97109100 | -2.36476700 | -1.85728900 |
| H | -3.62138100 | -1.19435900 | 0.89364400  |
| H | -2.95812200 | 0.17947100  | -1.76037400 |
| H | -3.64237000 | 1.34471800  | 0.98448100  |
| H | -2.95955800 | 2.71932400  | -1.66162700 |
| H | 5.09169100  | 1.34564300  | 1.08378900  |
| H | 5.83222900  | 2.75584200  | -1.57117200 |
| H | 5.12981300  | 3.89441100  | 1.22141900  |
| H | 3.61315700  | 4.06083800  | -1.46412000 |
| H | 5.81056000  | 5.31073600  | -1.44346500 |
| H | 7.36135300  | 5.23477100  | 1.22700600  |
| H | 9.07742800  | 3.93164000  | -0.01191300 |
| H | 7.29778600  | 2.61947500  | 1.15287400  |
| H | 9.06712600  | 1.40859400  | -0.14367100 |
| H | 5.83592300  | 0.21964900  | -1.70301100 |
| H | 7.29306000  | 0.08260300  | 1.02644000  |
| H | 8.10007800  | -1.03202900 | -1.74456400 |
| H | 7.31445800  | -2.45427300 | 0.88888600  |
| H | 5.84324400  | -2.31630400 | -1.83212300 |
| H | 5.09968600  | -1.18877400 | 0.95349800  |
| H | 8.13674700  | -3.53739600 | -1.88921200 |
| H | 7.39331000  | -5.06409900 | 0.68936400  |
| H | 5.37779700  | -5.82721000 | -0.55724900 |
| H | 5.15480300  | -3.74040600 | 0.82939600  |
| H | 3.62954900  | -3.63992700 | -1.85427200 |
| H | -3.60553100 | -3.73602500 | 0.80214600  |
| H | -5.20170100 | -3.66656700 | -1.84449400 |
| H | -9.11471400 | -3.66909900 | -0.50181400 |
| H | -7.86145400 | -5.83785000 | -0.24791700 |
| H | -5.80595500 | -4.99814400 | 0.88145900  |
| H | -3.43454300 | -5.84480200 | -0.56550000 |
| H | -1.43562600 | -5.04326300 | 0.67361600  |
| H | 0.97763700  | -5.82204400 | -0.38486500 |
| H | 2.93067900  | -4.95717900 | 0.82604300  |
| H | -8.09679800 | -1.17799500 | 0.99734400  |
| H | -9.10982200 | 1.37555800  | -0.38663700 |
| H | -8.15101300 | 3.83456500  | 1.16375600  |
| H | -7.43975800 | 5.31610400  | -1.45014400 |
| H | -5.41201300 | 6.10304700  | -0.23790800 |
| H | -3.46355800 | 6.10321600  | -0.16115300 |
| H | -1.48782800 | 5.25300100  | 1.06459700  |
| H | 0.94455700  | 6.07091000  | 0.20705000  |
| H | 2.89904900  | 5.09699000  | 1.33253600  |
| H | -5.82804400 | -2.44663200 | 0.93138000  |
| H | -5.16927700 | -1.10686400 | -1.78192900 |
| H | -5.83709800 | 0.07655600  | 1.00029900  |
| H | -5.17052800 | 1.44172400  | -1.69868700 |
| H | -5.85395200 | 2.60409500  | 1.08940500  |
| H | -5.20415700 | 3.99751800  | -1.59853700 |

|   |             |             |             |
|---|-------------|-------------|-------------|
| H | -3.64874100 | 3.90952400  | 1.06867600  |
| H | -7.35985200 | 0.15592100  | -1.69532000 |
| H | -7.37076300 | 2.70297100  | -1.60735900 |
| H | -7.36915300 | -2.39056500 | -1.75454800 |
| H | -0.45701400 | 1.89488300  | 3.28095300  |
| N | -0.92123700 | 1.00809900  | 3.40838500  |
| C | -0.21099300 | -0.14721500 | 3.34414900  |
| H | -1.89648800 | 0.95233800  | 3.14493800  |
| C | 1.21959600  | -0.08742600 | 3.50238900  |
| N | -0.88798400 | -1.25808700 | 3.15117900  |
| C | 1.87098100  | -1.27371300 | 3.44751300  |
| H | 1.74371100  | 0.84786000  | 3.64905200  |
| C | -0.23480700 | -2.46147900 | 3.11273300  |
| N | 1.17413500  | -2.41917300 | 3.26546700  |
| H | 2.94860400  | -1.36610100 | 3.53554100  |
| O | -0.76314500 | -3.54255500 | 2.93083800  |
| H | 1.63742000  | -3.31692200 | 3.20282500  |

#### Graphane-U

|   |             |            |             |
|---|-------------|------------|-------------|
| C | -5.13998400 | 1.40633900 | -0.59247400 |
| C | -5.87280000 | 2.65195300 | -0.03918200 |
| C | -3.67017200 | 1.39184700 | -0.12349000 |
| C | -8.06324200 | 1.37824600 | -0.06773900 |
| C | -7.34695800 | 2.66405100 | -0.51611400 |
| C | -5.15896000 | 3.94823700 | -0.49273600 |
| C | -2.95744100 | 2.68192100 | -0.55426600 |
| C | -8.08725900 | 3.89978600 | 0.03183400  |
| C | -5.90601900 | 5.17409300 | 0.07535500  |
| C | -3.68599400 | 3.93653200 | -0.03543400 |
| C | -1.49369100 | 2.66265400 | -0.08077500 |
| C | -7.37099200 | 5.19218800 | -0.37635700 |
| H | -5.85344800 | 5.16686300 | 1.18054000  |
| C | -2.94914700 | 5.19816100 | -0.50326800 |
| C | -0.75211500 | 1.41643700 | -0.59385600 |
| C | -0.74362500 | 3.94661500 | -0.47108000 |
| H | -7.88946200 | 6.06538900 | 0.06137700  |
| C | -1.50584900 | 5.19441700 | -0.01691100 |
| H | -2.96130900 | 5.23989400 | -1.60154300 |
| C | 0.70742100  | 1.39246500 | -0.10646600 |
| C | 0.69335200  | 3.91767000 | 0.07188800  |
| H | -1.00632900 | 6.09717700 | -0.38128500 |
| C | 1.45052900  | 2.69043800 | -0.46189300 |
| C | 1.45366500  | 5.21213800 | -0.22930800 |
| C | 2.90950600  | 2.65991400 | 0.02640300  |
| C | 2.89506000  | 5.16477800 | 0.26091600  |
| H | 1.43944300  | 5.39109200 | -1.31584900 |
| C | 3.63387400  | 1.42244100 | -0.52252700 |
| C | 3.63976100  | 3.96596400 | -0.34085300 |
| H | 3.40331400  | 6.10529400 | 0.01503600  |
| C | 5.09532600  | 1.39344400 | -0.02748000 |

|   |             |             |             |
|---|-------------|-------------|-------------|
| C | 5.10991500  | 3.93193600  | 0.12469100  |
| C | 5.83116800  | 2.68806500  | -0.44837800 |
| C | 5.85738900  | 5.20920700  | -0.31516200 |
| C | 7.30095500  | 2.65707600  | 0.04123700  |
| H | 5.35136800  | 6.10456300  | 0.09383100  |
| C | 7.31953300  | 5.18656100  | 0.14516700  |
| C | 8.04196400  | 3.94079200  | -0.38030200 |
| C | 8.02422000  | 1.42024900  | -0.51938900 |
| H | 7.83828800  | 6.09883000  | -0.20416600 |
| C | 8.05284900  | -3.61766900 | -0.84452500 |
| C | 8.02778100  | -1.09874800 | -0.67483100 |
| C | 7.33874200  | -4.92090300 | -0.46786700 |
| C | 7.31122100  | -2.39715600 | -0.26550400 |
| C | 7.29626000  | 0.12945600  | -0.10575300 |
| C | 5.87188500  | -4.89342700 | -0.91282100 |
| H | 7.85629300  | -5.78177500 | -0.93099000 |
| C | 5.83833900  | -2.37526200 | -0.74659700 |
| C | 5.82842800  | 0.15640000  | -0.59751300 |
| C | 5.12633200  | -3.68027900 | -0.31592300 |
| H | 5.81474400  | -4.86365000 | -2.01742800 |
| C | 5.10047300  | -1.14123600 | -0.17471800 |
| C | 3.64959200  | -3.66809700 | -0.76180000 |
| C | 3.63690900  | -1.12025100 | -0.66467800 |
| C | 2.91816600  | -4.92658400 | -0.27733200 |
| C | 2.92118900  | -2.41212500 | -0.24600300 |
| C | 2.90668600  | 0.12467400  | -0.13547000 |
| C | 1.46749800  | -4.92749200 | -0.74080800 |
| H | 3.42307300  | -5.83429400 | -0.63031100 |
| C | 1.45440300  | -2.39872800 | -0.71336800 |
| C | 1.44873300  | 0.14795600  | -0.61886600 |
| C | 0.71106100  | -3.67555700 | -0.28789700 |
| H | 1.43229300  | -4.98809600 | -1.83989800 |
| C | 0.71273000  | -1.14245200 | -0.22717200 |
| C | -0.74103000 | -3.66535200 | -0.78903800 |
| C | -0.75089600 | -1.12718500 | -0.70192400 |
| C | -1.48990500 | -4.93766900 | -0.38253200 |
| C | -1.48383000 | -2.41477900 | -0.29039500 |
| C | -1.48505700 | 0.12540200  | -0.19816900 |
| C | -2.94324500 | -4.92004900 | -0.83716300 |
| H | -0.99946100 | -5.81939700 | -0.80574400 |
| C | -2.95577300 | -2.40408500 | -0.73763700 |
| C | -2.95047700 | 0.14098000  | -0.65483100 |
| C | -3.67340400 | -3.69009700 | -0.28311300 |
| H | -2.98052900 | -4.90114800 | -1.93571000 |
| C | -3.66542000 | -1.14670400 | -0.21445600 |
| C | -5.15290100 | -3.67835700 | -0.71885100 |
| C | -5.13888300 | -1.13412300 | -0.67130100 |
| C | -5.89075800 | -4.93514100 | -0.20950200 |
| C | -5.86514900 | -2.41171100 | -0.18637200 |
| C | -5.86241300 | 0.12017500  | -0.12696400 |

|   |             |             |             |
|---|-------------|-------------|-------------|
| C | -7.35992600 | -4.93394500 | -0.64772700 |
| H | -5.38998600 | -5.84771100 | -0.58514800 |
| C | -7.34246200 | -2.40142600 | -0.65400400 |
| C | -7.33594200 | 0.13196600  | -0.60234800 |
| C | -8.07598700 | -3.66649400 | -0.16707900 |
| H | -7.42475800 | -5.00900200 | -1.75012200 |
| C | -8.05970100 | -1.14309300 | -0.13478100 |
| H | 8.11929800  | 3.98990100  | -1.48295100 |
| H | 8.08979700  | 1.48424900  | -1.62162700 |
| H | 9.07281200  | -1.11527100 | -0.31533600 |
| H | 9.09443500  | -3.63709000 | -0.47528200 |
| H | -8.13700000 | -3.66769100 | 0.93765300  |
| H | -9.10646300 | -1.13305800 | -0.48909800 |
| H | -8.12095700 | 1.34038300  | 1.03611300  |
| H | -9.12836000 | 3.91115400  | -0.33876600 |
| H | 0.69517100  | -1.18439100 | 0.87750700  |
| H | 0.67361500  | 1.32954100  | 0.99642200  |
| H | -1.49228100 | 0.08780900  | 0.90570100  |
| H | 1.46868600  | 0.20114000  | -1.72368000 |
| H | -0.74117800 | -1.08649700 | -1.80718400 |
| H | -0.73429400 | 1.46822600  | -1.69876200 |
| H | 1.46469000  | -2.37167500 | -1.81968600 |
| H | 2.90946100  | -2.45590400 | 0.85727600  |
| H | 3.63140700  | -1.06869500 | -1.77296300 |
| H | 2.88036700  | 0.06149300  | 0.96814600  |
| H | 3.63299000  | 1.49234100  | -1.62976200 |
| H | 2.88466900  | 2.58339400  | 1.12896400  |
| H | 1.47921400  | 2.77138100  | -1.56505100 |
| H | 0.62916100  | 3.81100500  | 1.16997100  |
| H | -0.68235400 | 3.97482300  | -1.57426900 |
| H | -1.50615000 | 2.60431400  | 1.02297500  |
| H | 0.67345700  | -3.68784100 | 0.81620800  |
| H | -0.71529700 | -3.61963400 | -1.89320000 |
| H | -1.48525300 | -2.46280800 | 0.81366400  |
| H | -2.96882000 | -2.37371200 | -1.84097500 |
| H | -3.63716500 | -1.18246200 | 0.89598000  |
| H | -2.95555500 | 0.17982100  | -1.75770000 |
| H | -3.64597800 | 1.34833700  | 0.98535500  |
| H | -2.95068500 | 2.72285100  | -1.65748500 |
| H | 5.09751400  | 1.32905100  | 1.08602900  |
| H | 5.82972000  | 2.75563000  | -1.56182800 |
| H | 5.13306200  | 3.87681300  | 1.23927500  |
| H | 3.61583800  | 4.06052800  | -1.44488200 |
| H | 5.81169000  | 5.31142000  | -1.41597700 |
| H | 7.36804400  | 5.21338500  | 1.25061900  |
| H | 9.08058500  | 3.91868800  | -0.00291500 |
| H | 7.30392600  | 2.59859100  | 1.15643700  |
| H | 9.06801700  | 1.39696000  | -0.15666800 |
| H | 5.82828600  | 0.22130800  | -1.71134100 |
| H | 7.29985600  | 0.06100600  | 1.00903100  |

|   |             |             |             |
|---|-------------|-------------|-------------|
| H | 8.08953100  | -1.02861300 | -1.77691400 |
| H | 7.32103900  | -2.47474500 | 0.84849800  |
| H | 5.82962300  | -2.31364900 | -1.86032100 |
| H | 5.10662100  | -1.20704400 | 0.93867000  |
| H | 8.12135000  | -3.53296300 | -1.94560100 |
| H | 7.39881200  | -5.08221400 | 0.62548300  |
| H | 5.37190700  | -5.83295400 | -0.60880300 |
| H | 5.16438700  | -3.75682400 | 0.79702000  |
| H | 3.60973000  | -3.64566400 | -1.86923000 |
| H | -3.62106600 | -3.72685500 | 0.82348300  |
| H | -5.19795500 | -3.67106100 | -1.83439500 |
| H | -9.11967000 | -3.66109100 | -0.53040300 |
| H | -7.87199000 | -5.83005900 | -0.25055200 |
| H | -5.82664100 | -4.98703300 | 0.89397100  |
| H | -3.44156400 | -5.84493800 | -0.52153400 |
| H | -1.44397600 | -5.03514000 | 0.71288900  |
| H | 0.97520100  | -5.82600500 | -0.35876800 |
| H | 2.94476700  | -4.96019900 | 0.82157900  |
| H | -8.11490500 | -1.16543800 | 0.96961700  |
| H | -9.10916100 | 1.38539500  | -0.42460600 |
| H | -8.15615600 | 3.84234100  | 1.13458700  |
| H | -7.42577700 | 5.32351600  | -1.47404200 |
| H | -5.40493800 | 6.10663800  | -0.24674200 |
| H | -3.45714200 | 6.10381400  | -0.14933200 |
| H | -1.48835800 | 5.24233000  | 1.08305900  |
| H | 0.94914900  | 6.06364500  | 0.23668800  |
| H | 2.90122600  | 5.08216700  | 1.35705400  |
| H | -5.84589600 | -2.43396600 | 0.92867600  |
| H | -5.16709500 | -1.10777800 | -1.78673300 |
| H | -5.84915100 | 0.08619300  | 0.98807600  |
| H | -5.16011800 | 1.44554000  | -1.70758400 |
| H | -5.86048700 | 2.60950600  | 1.07547800  |
| H | -5.18925400 | 4.00211000  | -1.60733500 |
| H | -3.65414800 | 3.90626700  | 1.07197000  |
| H | -7.35138700 | 0.16188700  | -1.71878800 |
| H | -7.35966300 | 2.71080800  | -1.63182200 |
| H | -7.36200900 | -2.38951900 | -1.77053900 |
| O | -0.76366900 | 1.07448700  | 3.19195800  |
| C | -0.18503700 | 0.01146300  | 3.26179100  |
| N | -0.81331800 | -1.21700400 | 3.21454000  |
| N | 1.19385500  | -0.08865200 | 3.38178400  |
| C | -0.22672400 | -2.49409800 | 3.24072400  |
| H | -1.82225500 | -1.18811500 | 3.10649100  |
| C | 1.86682000  | -1.28402700 | 3.44114100  |
| H | 1.68679400  | 0.79444000  | 3.38444500  |
| C | 1.22629000  | -2.46622100 | 3.38740600  |
| O | -0.91568000 | -3.48726400 | 3.12962100  |
| H | 2.94529800  | -1.20397200 | 3.52352500  |
| H | 1.75371500  | -3.40919100 | 3.42447800  |

## Graphane-S6C

|   |             |             |             |
|---|-------------|-------------|-------------|
| C | -5.05666600 | 1.42700800  | -0.62664800 |
| C | -5.78610700 | 2.66985100  | -0.06300000 |
| C | -3.59129500 | 1.39843000  | -0.14422300 |
| C | -7.98432300 | 1.40884400  | -0.12552200 |
| C | -7.25763400 | 2.69745300  | -0.54793600 |
| C | -5.06382800 | 3.96728700  | -0.49951400 |
| C | -2.86879500 | 2.68680400  | -0.56452400 |
| C | -7.99335500 | 3.92886200  | 0.01553100  |
| C | -5.80455900 | 5.19013700  | 0.08341000  |
| C | -3.59038000 | 3.94499300  | -0.04457900 |
| C | -1.40442500 | 2.66031500  | -0.09265300 |
| C | -7.26849600 | 5.22316200  | -0.37098500 |
| H | -5.75448300 | 5.16838700  | 1.18840400  |
| C | -2.84797700 | 5.20266800  | -0.51481400 |
| C | -0.66795400 | 1.40603900  | -0.59272300 |
| C | -0.64750200 | 3.93808000  | -0.49177500 |
| H | -7.78305500 | 6.09257100  | 0.07885700  |
| C | -1.40140100 | 5.19146600  | -0.03864000 |
| H | -2.86723300 | 5.24549700  | -1.61285500 |
| C | 0.78951700  | 1.37635800  | -0.10065400 |
| C | 0.79276200  | 3.90704500  | 0.04183000  |
| H | -0.89955900 | 6.08994300  | -0.40953000 |
| C | 1.54261800  | 2.66553500  | -0.46898800 |
| C | 1.56177000  | 5.18911500  | -0.28934300 |
| C | 2.99703300  | 2.63268000  | 0.03312200  |
| C | 2.99915800  | 5.14417500  | 0.21223900  |
| H | 1.55477300  | 5.33846200  | -1.38039400 |
| C | 3.71875500  | 1.38146100  | -0.48854800 |
| C | 3.74143900  | 3.92566700  | -0.35209100 |
| H | 3.51512800  | 6.07492400  | -0.05404100 |
| C | 5.17157100  | 1.34901200  | 0.03017700  |
| C | 5.20260400  | 3.89045800  | 0.14015900  |
| C | 5.92538800  | 2.63152200  | -0.39643500 |
| C | 5.96815500  | 5.15433300  | -0.30748300 |
| C | 7.38386100  | 2.59863400  | 0.12599200  |
| H | 5.46026800  | 6.06066500  | 0.07369500  |
| C | 7.41958000  | 5.12987400  | 0.18578500  |
| C | 8.14404600  | 3.86957300  | -0.30080500 |
| C | 8.11075600  | 1.34772400  | -0.39726100 |
| H | 7.95284100  | 6.03193700  | -0.16768800 |
| C | 8.11072900  | -3.69093500 | -0.66629100 |
| C | 8.09967500  | -1.17171000 | -0.51854500 |
| C | 7.37446800  | -4.98592300 | -0.30467000 |
| C | 7.36113100  | -2.46077400 | -0.11857900 |
| C | 7.36243700  | 0.06838600  | 0.01650100  |
| C | 5.92364500  | -4.94973400 | -0.79911800 |
| H | 7.90045600  | -5.85415300 | -0.74345300 |
| C | 5.90290800  | -2.43017800 | -0.64189100 |
| C | 5.90685500  | 0.10007700  | -0.51038500 |

|   |             |             |             |
|---|-------------|-------------|-------------|
| C | 5.16800000  | -3.72896100 | -0.23124400 |
| H | 5.90402100  | -4.92290500 | -1.90496800 |
| C | 5.16006400  | -1.18870400 | -0.09255300 |
| C | 3.70755700  | -3.70209400 | -0.72658500 |
| C | 3.70702900  | -1.15806100 | -0.61103600 |
| C | 2.95362200  | -4.96588200 | -0.29220400 |
| C | 2.97353400  | -2.44772800 | -0.21390300 |
| C | 2.97698600  | 0.09310000  | -0.09581100 |
| C | 1.51581300  | -4.94406300 | -0.79416200 |
| H | 3.46038300  | -5.86828700 | -0.65585800 |
| C | 1.51844500  | -2.41805400 | -0.71512500 |
| C | 1.52688600  | 0.12406700  | -0.60144200 |
| C | 0.75964500  | -3.69758600 | -0.32673300 |
| H | 1.50750700  | -4.97477500 | -1.89498200 |
| C | 0.77800700  | -1.16356900 | -0.22259600 |
| C | -0.68598900 | -3.66581900 | -0.84518200 |
| C | -0.68026100 | -1.13298900 | -0.71251000 |
| C | -1.44987300 | -4.94469200 | -0.48988900 |
| C | -1.42871600 | -2.42112300 | -0.33109900 |
| C | -1.41228000 | 0.11902400  | -0.20367200 |
| C | -2.89700000 | -4.90462600 | -0.96211500 |
| H | -0.95811600 | -5.81662400 | -0.93095600 |
| C | -2.89361300 | -2.39212200 | -0.80123700 |
| C | -2.87310600 | 0.14776600  | -0.67680100 |
| C | -3.62719600 | -3.68304700 | -0.38961400 |
| H | -2.91739400 | -4.85751500 | -2.05998400 |
| C | -3.60391500 | -1.14057800 | -0.26551300 |
| C | -5.09986800 | -3.65220000 | -0.84644400 |
| C | -5.06967900 | -1.11039300 | -0.74642600 |
| C | -5.85278500 | -4.91532200 | -0.37596700 |
| C | -5.81099900 | -2.39234300 | -0.29683300 |
| C | -5.79186000 | 0.13857900  | -0.18836300 |
| C | -7.31579000 | -4.89396600 | -0.83396200 |
| H | -5.35333500 | -5.82241300 | -0.76638000 |
| C | -7.28213700 | -2.36237900 | -0.78248100 |
| C | -7.26045500 | 0.16840600  | -0.67784800 |
| C | -8.02989000 | -3.63311200 | -0.33365600 |
| H | -7.36598200 | -4.94290900 | -1.93866600 |
| C | -7.99701000 | -1.11101700 | -0.24369700 |
| H | 8.24676300  | 3.89837100  | -1.40200800 |
| H | 8.20444600  | 1.39451900  | -1.49824800 |
| H | 9.13327300  | -1.19282900 | -0.12774900 |
| H | 9.13970300  | -3.71602200 | -0.26363100 |
| H | -8.10579400 | -3.65880800 | 0.76979200  |
| H | -9.04011500 | -1.08677100 | -0.60814700 |
| H | -8.04919500 | 1.35214800  | 0.97705000  |
| H | -9.03295100 | 3.95153400  | -0.35899000 |
| H | 0.75226400  | -1.21583900 | 0.88191300  |
| H | 0.76122300  | 1.32254200  | 1.00305200  |
| H | -1.42731300 | 0.06806200  | 0.90210100  |

|   |             |             |             |
|---|-------------|-------------|-------------|
| H | 1.56155700  | 0.17702900  | -1.70615100 |
| H | -0.65863300 | -1.07765300 | -1.81705700 |
| H | -0.64529200 | 1.45498900  | -1.69740700 |
| H | 1.55264700  | -2.37402400 | -1.82035100 |
| H | 2.93737100  | -2.49942800 | 0.88871200  |
| H | 3.72448900  | -1.10570600 | -1.71955000 |
| H | 2.93634000  | 0.03974600  | 1.00650700  |
| H | 3.73603200  | 1.43696600  | -1.59689800 |
| H | 2.96167500  | 2.57466400  | 1.13486900  |
| H | 1.57811100  | 2.72995700  | -1.57312200 |
| H | 0.73606800  | 3.82574500  | 1.14245300  |
| H | -0.59420900 | 3.95867900  | -1.59526000 |
| H | -1.41982100 | 2.61629300  | 1.01348100  |
| H | 0.71482600  | -3.73068900 | 0.77660300  |
| H | -0.64479000 | -3.59226300 | -1.94706500 |
| H | -1.44707800 | -2.47971500 | 0.77458400  |
| H | -2.88561100 | -2.33949300 | -1.90377100 |
| H | -3.59494000 | -1.19512300 | 0.84315000  |
| H | -2.86073000 | 0.20076200  | -1.77910400 |
| H | -3.57961700 | 1.34704700  | 0.96501200  |
| H | -2.85882100 | 2.73149300  | -1.66735600 |
| H | 5.15316500  | 1.29902800  | 1.14497600  |
| H | 5.94834400  | 2.68013300  | -1.51049300 |
| H | 5.20435500  | 3.85421400  | 1.25614200  |
| H | 3.73674200  | 3.99716100  | -1.45826600 |
| H | 5.94735000  | 5.23553500  | -1.41064700 |
| H | 7.44308300  | 5.17557800  | 1.29150900  |
| H | 9.17340600  | 3.84648600  | 0.10095700  |
| H | 7.36118300  | 2.55890600  | 1.24190400  |
| H | 9.14456200  | 1.32187300  | -0.00731600 |
| H | 5.93317100  | 0.15382600  | -1.62437500 |
| H | 7.33800500  | 0.01483900  | 1.13198400  |
| H | 8.19411400  | -1.11285100 | -1.61889800 |
| H | 7.33777400  | -2.52883000 | 0.99592500  |
| H | 5.92679000  | -2.37007100 | -1.75540800 |
| H | 5.14184500  | -1.24656400 | 1.02182500  |
| H | 8.21478300  | -3.61359100 | -1.76503300 |
| H | 7.39580000  | -5.13865400 | 0.79145300  |
| H | 5.40771900  | -5.88453600 | -0.50838100 |
| H | 5.16766200  | -3.80176000 | 0.88289500  |
| H | 3.70532000  | -3.65954800 | -1.83427100 |
| H | -3.59510500 | -3.74553900 | 0.71720700  |
| H | -5.12862000 | -3.62002000 | -1.96219000 |
| H | -9.06873700 | -3.61255200 | -0.71036700 |
| H | -7.83922100 | -5.79561100 | -0.46508900 |
| H | -5.80505700 | -4.99274400 | 0.72660900  |
| H | -3.40615800 | -5.83403600 | -0.67864100 |
| H | -1.42144400 | -5.08258400 | 0.60279300  |
| H | 1.00780200  | -5.84912700 | -0.44914500 |
| H | 2.95105100  | -5.02768900 | 0.80514700  |



|   |             |             |             |
|---|-------------|-------------|-------------|
| H | -8.06355700 | -1.15598700 | 0.85933000  |
| H | -9.02801500 | 1.42840400  | -0.48856700 |
| H | -8.06729100 | 3.85551400  | 1.11696400  |
| H | -7.32013700 | 5.37174300  | -1.46667400 |
| H | -5.29722200 | 6.12381300  | -0.22566100 |
| H | -3.34894200 | 6.11065400  | -0.15700100 |
| H | -1.37546800 | 5.24457500  | 1.06110000  |
| H | 1.06102400  | 6.05646400  | 0.15089300  |
| H | 2.99600500  | 5.08988000  | 1.30996800  |
| H | -5.80618000 | -2.43712000 | 0.81766000  |
| H | -5.08063500 | -1.06260500 | -1.86132900 |
| H | -5.78965800 | 0.08612900  | 0.92597900  |
| H | -5.06573100 | 1.48219600  | -1.74141400 |
| H | -5.78032300 | 2.61470300  | 1.05093300  |
| H | -5.09429700 | 4.03482000  | -1.61360800 |
| H | -3.55738100 | 3.91486400  | 1.06306500  |
| H | -7.26464400 | 0.22062500  | -1.79366300 |
| H | -7.26349500 | 2.76231900  | -1.66290800 |
| H | -7.28765300 | -2.32517600 | -1.89867200 |
| C | 0.20792500  | -0.11336200 | 3.77878000  |
| C | -1.20797200 | -0.00723900 | 4.34981300  |
| C | -2.07027200 | -1.19152900 | 3.90495200  |
| C | -1.42096000 | -2.52525300 | 4.28267000  |
| C | -0.00652200 | -2.62848600 | 3.70775900  |
| C | 0.86299000  | -1.44721900 | 4.14631600  |
| H | -3.07476600 | -1.11739300 | 4.33660900  |
| H | -1.15526500 | 0.00773300  | 5.44773900  |
| H | -1.67156100 | 0.93700900  | 4.04022300  |
| H | 0.15230700  | -0.03647500 | 2.68372100  |
| H | 0.82528000  | 0.72510500  | 4.12165300  |
| H | -1.37296100 | -2.60598800 | 5.37800800  |
| H | -2.03636100 | -3.36101900 | 3.92917700  |
| H | 0.45953900  | -3.57662900 | 3.99962700  |
| H | -0.07173800 | -2.63236900 | 2.61024000  |
| H | 1.00846400  | -1.49083600 | 5.23513100  |
| H | 1.85778000  | -1.51914700 | 3.68990700  |
| H | -2.19202600 | -1.15325700 | 2.81190700  |

#### Graphane-S6N

|   |             |            |             |
|---|-------------|------------|-------------|
| C | -5.14353100 | 1.39229600 | -0.54369000 |
| C | -5.87320900 | 2.62986700 | 0.03114000  |
| C | -3.67052800 | 1.37366500 | -0.08456300 |
| C | -8.06263600 | 1.35277300 | 0.00326700  |
| C | -7.35211700 | 2.64651900 | -0.43113400 |
| C | -5.16665300 | 3.93235100 | -0.41619300 |
| C | -2.96331400 | 2.66794500 | -0.51203300 |
| C | -8.08808100 | 3.87315100 | 0.14238600  |
| C | -5.90779300 | 5.15049000 | 0.17597800  |
| C | -3.68711100 | 3.92009800 | 0.01893400  |
| C | -1.49385500 | 2.65028800 | -0.05624800 |

|   |             |             |             |
|---|-------------|-------------|-------------|
| C | -7.37851600 | 5.17218100  | -0.25658900 |
| H | -5.84102800 | 5.13092000  | 1.28006200  |
| C | -2.95893200 | 5.18365900  | -0.45743300 |
| C | -0.75396800 | 1.40181600  | -0.56611700 |
| C | -0.74942700 | 3.93464000  | -0.45670800 |
| H | -7.89266600 | 6.03852500  | 0.19951800  |
| C | -1.50790000 | 5.18201400  | 0.00553000  |
| H | -2.98881200 | 5.22718700  | -1.55518900 |
| C | 0.70752900  | 1.38062800  | -0.08555100 |
| C | 0.69576100  | 3.91098200  | 0.06462700  |
| H | -1.01540100 | 6.08465300  | -0.36803300 |
| C | 1.44724900  | 2.67587200  | -0.45930900 |
| C | 1.45169700  | 5.20051600  | -0.26781200 |
| C | 2.91087800  | 2.65221800  | 0.01572200  |
| C | 2.89810400  | 5.16158900  | 0.20816900  |
| H | 1.42593000  | 5.35887000  | -1.35734200 |
| C | 3.63051200  | 1.40787300  | -0.52517200 |
| C | 3.63696300  | 3.95220200  | -0.37997500 |
| H | 3.40285700  | 6.09802600  | -0.05989800 |
| C | 5.09493800  | 1.38596600  | -0.03912100 |
| C | 5.11067700  | 3.92644700  | 0.07440500  |
| C | 5.82858400  | 2.67378900  | -0.48365200 |
| C | 5.85497400  | 5.19671100  | -0.39086000 |
| C | 7.30072400  | 2.65089200  | -0.00058100 |
| H | 5.35122300  | 6.09840000  | 0.00638500  |
| C | 7.31983200  | 5.18180000  | 0.06152400  |
| C | 8.03963200  | 3.92748200  | -0.44721900 |
| C | 8.02207100  | 1.40470100  | -0.54281500 |
| H | 7.83650400  | 6.08817500  | -0.30521300 |
| C | 8.05073000  | -3.63899400 | -0.77116700 |
| C | 8.02560400  | -1.11704200 | -0.65167700 |
| C | 7.33487500  | -4.93405300 | -0.37020000 |
| C | 7.30802200  | -2.40712300 | -0.21798600 |
| C | 7.29465000  | 0.12153900  | -0.10451600 |
| C | 5.86992900  | -4.91510200 | -0.82210200 |
| H | 7.85416700  | -5.80458800 | -0.81228300 |
| C | 5.83607500  | -2.39324000 | -0.70195400 |
| C | 5.82594400  | 0.14063400  | -0.59391700 |
| C | 5.12189600  | -3.69067600 | -0.25180800 |
| H | 5.81777400  | -4.90581900 | -1.92720500 |
| C | 5.09834600  | -1.15014700 | -0.15005000 |
| C | 3.64843600  | -3.68290200 | -0.70770900 |
| C | 3.63461100  | -1.13400400 | -0.63872800 |
| C | 2.91099400  | -4.93606700 | -0.21792700 |
| C | 2.91799400  | -2.42184500 | -0.20900500 |
| C | 2.90614300  | 0.11513600  | -0.11761000 |
| C | 1.46822400  | -4.94220300 | -0.70607800 |
| H | 3.42088000  | -5.84825200 | -0.55193900 |
| C | 1.45559000  | -2.40864900 | -0.68838400 |
| C | 1.44677500  | 0.13368200  | -0.59672600 |

|   |             |             |             |
|---|-------------|-------------|-------------|
| C | 0.70479700  | -3.68612300 | -0.27763800 |
| H | 1.45190000  | -5.01294300 | -1.80506100 |
| C | 0.71004100  | -1.15512500 | -0.20150800 |
| C | -0.73475600 | -3.66855400 | -0.81391400 |
| C | -0.74844400 | -1.13655000 | -0.69160800 |
| C | -1.48997000 | -4.95555300 | -0.47033900 |
| C | -1.48499400 | -2.42897000 | -0.30096500 |
| C | -1.48421900 | 0.10911400  | -0.17237300 |
| C | -2.93983300 | -4.91967700 | -0.93511600 |
| H | -0.99305900 | -5.81924000 | -0.92242200 |
| C | -2.95360400 | -2.41009600 | -0.75753000 |
| C | -2.95024900 | 0.12909100  | -0.62785100 |
| C | -3.67241700 | -3.70816000 | -0.34422900 |
| H | -2.96680900 | -4.85942800 | -2.03216500 |
| C | -3.66529100 | -1.16516400 | -0.20848400 |
| C | -5.15283900 | -3.68584600 | -0.77611400 |
| C | -5.13924900 | -1.14469800 | -0.66494400 |
| C | -5.88865500 | -4.95671500 | -0.29947300 |
| C | -5.86376400 | -2.43361200 | -0.20844000 |
| C | -5.86197500 | 0.09819500  | -0.09418100 |
| C | -7.35976900 | -4.94363600 | -0.73112900 |
| H | -5.38942100 | -5.85773200 | -0.70417500 |
| C | -7.34305300 | -2.41248300 | -0.66935600 |
| C | -7.33833900 | 0.11760400  | -0.56032000 |
| C | -8.07393400 | -3.69014400 | -0.21254800 |
| H | -7.42910700 | -4.98769400 | -1.83503600 |
| C | -8.05810000 | -1.16772700 | -0.11556000 |
| H | 8.11076900  | 3.95808200  | -1.55084200 |
| H | 8.08324800  | 1.44966900  | -1.64609500 |
| H | 9.07051000  | -1.12744000 | -0.29208800 |
| H | 9.09125000  | -3.65133900 | -0.39897400 |
| H | -8.13007500 | -3.72090500 | 0.89184700  |
| H | -9.10740900 | -1.15060800 | -0.46213300 |
| H | -8.10965800 | 1.29608900  | 1.10663700  |
| H | -9.13336400 | 3.88795400  | -0.21632600 |
| H | 0.66920800  | -1.19626100 | 0.90174200  |
| H | 0.68546500  | 1.31989600  | 1.01919600  |
| H | -1.47619400 | 0.04585900  | 0.93059600  |
| H | 1.46394000  | 0.18722500  | -1.70215100 |
| H | -0.73347100 | -1.08132800 | -1.79699300 |
| H | -0.73968700 | 1.45560600  | -1.67083600 |
| H | 1.47828100  | -2.38003900 | -1.79476800 |
| H | 2.90388300  | -2.45175600 | 0.89470000  |
| H | 3.62775800  | -1.09323800 | -1.74787400 |
| H | 2.88877800  | 0.06354100  | 0.98528700  |
| H | 3.62249300  | 1.46572100  | -1.63355100 |
| H | 2.89791500  | 2.58912700  | 1.11798100  |
| H | 1.46462700  | 2.74335500  | -1.56375900 |
| H | 0.64973500  | 3.82413700  | 1.16542600  |
| H | -0.70481600 | 3.95912900  | -1.56047900 |

|   |             |             |             |
|---|-------------|-------------|-------------|
| H | -1.49924400 | 2.60360300  | 1.05002900  |
| H | 0.64265700  | -3.69062000 | 0.82642200  |
| H | -0.68096000 | -3.59448400 | -1.91526400 |
| H | -1.48377900 | -2.47682300 | 0.80290700  |
| H | -2.96067200 | -2.35171900 | -1.85982100 |
| H | -3.63674200 | -1.22163300 | 0.90086200  |
| H | -2.95533800 | 0.18253000  | -1.73023700 |
| H | -3.64172500 | 1.32256400  | 1.02453700  |
| H | -2.96675600 | 2.71421400  | -1.61477500 |
| H | 5.10191400  | 1.33718700  | 1.07583600  |
| H | 5.82139400  | 2.72409400  | -1.59782800 |
| H | 5.14167800  | 3.88802900  | 1.18973400  |
| H | 3.60421500  | 4.02940000  | -1.48535200 |
| H | 5.80296500  | 5.28013400  | -1.49285600 |
| H | 7.37390100  | 5.22582600  | 1.16620900  |
| H | 9.08006700  | 3.91143100  | -0.07486100 |
| H | 7.30824000  | 2.61102300  | 1.11552800  |
| H | 9.06681600  | 1.38719500  | -0.18299100 |
| H | 5.82287800  | 0.18926900  | -1.70832600 |
| H | 7.29924500  | 0.07333500  | 1.01151300  |
| H | 8.08615000  | -1.06709200 | -1.75476900 |
| H | 7.31514400  | -2.46239100 | 0.89747700  |
| H | 5.82900800  | -2.34913600 | -1.81635300 |
| H | 5.10335800  | -1.19767900 | 0.96503700  |
| H | 8.12140300  | -3.57591000 | -1.87343300 |
| H | 7.38942700  | -5.07108300 | 0.72679400  |
| H | 5.36853000  | -5.84829500 | -0.50207900 |
| H | 5.15243800  | -3.74617500 | 0.86277300  |
| H | 3.61655600  | -3.67132400 | -1.81579700 |
| H | -3.62224900 | -3.77917100 | 0.76163700  |
| H | -5.20024800 | -3.64828500 | -1.89101100 |
| H | -9.11937300 | -3.67543200 | -0.57082800 |
| H | -7.87023800 | -5.85066100 | -0.35747500 |
| H | -5.82065600 | -5.04011900 | 0.80145700  |
| H | -3.44212100 | -5.85540000 | -0.65982600 |
| H | -1.45745900 | -5.10688300 | 0.62075700  |
| H | 0.96852400  | -5.83792100 | -0.32515600 |
| H | 2.92032700  | -4.95469700 | 0.88132200  |
| H | -8.10533800 | -1.21507400 | 0.98822600  |
| H | -9.11198400 | 1.36452900  | -0.34339200 |
| H | -8.14459600 | 3.80056100  | 1.24483300  |
| H | -7.44739600 | 5.31866000  | -1.35163400 |
| H | -5.41188400 | 6.08731400  | -0.14211300 |
| H | -3.46292500 | 6.08782400  | -0.09409300 |
| H | -1.47279700 | 5.23352200  | 1.10516800  |
| H | 0.95213600  | 6.06080100  | 0.18759300  |
| H | 2.91566800  | 5.09819800  | 1.30530200  |
| H | -5.83994500 | -2.48329500 | 0.90532800  |
| H | -5.16760700 | -1.09439700 | -1.77959800 |
| H | -5.84166600 | 0.04520700  | 1.01968900  |

|   |             |             |             |
|---|-------------|-------------|-------------|
| H | -5.17018100 | 1.44734000  | -1.65818400 |
| H | -5.85002700 | 2.57501300  | 1.14475500  |
| H | -5.21260100 | 3.99882700  | -1.52977800 |
| H | -3.63956800 | 3.88846800  | 1.12617300  |
| H | -7.36030000 | 0.17016100  | -1.67596400 |
| H | -7.37546100 | 2.71037800  | -1.54595100 |
| H | -7.36714400 | -2.37195500 | -1.78524400 |
| C | 0.93928600  | -0.05475200 | 3.94560400  |
| C | -0.58050600 | -0.12848100 | 3.82376800  |
| C | -0.52004300 | -2.55326000 | 3.71374500  |
| C | 1.00165100  | -2.56256600 | 3.83318800  |
| C | 1.48395300  | -1.32760200 | 4.59744900  |
| H | -1.02073200 | -0.12643000 | 4.83947100  |
| H | -0.96456100 | 0.75182500  | 3.29421700  |
| H | 1.36668000  | 0.05180500  | 2.93964700  |
| H | 1.22386900  | 0.83174600  | 4.52262400  |
| H | -0.95803500 | -2.66966800 | 4.72359800  |
| H | -0.86055900 | -3.39950800 | 3.10513000  |
| H | 1.33024500  | -3.48207500 | 4.32968500  |
| H | 1.43201000  | -2.55790000 | 2.82285900  |
| H | 1.12347300  | -1.38303100 | 5.63460200  |
| H | 2.57797300  | -1.30225000 | 4.64012800  |
| N | -0.95306500 | -1.31891200 | 3.06448000  |
| H | -1.96140700 | -1.33790100 | 2.92823300  |

#### Graphane-S6O

|   |             |            |             |
|---|-------------|------------|-------------|
| C | -5.00188300 | 1.43903900 | -0.64076500 |
| C | -5.73214400 | 2.68366600 | -0.08203200 |
| C | -3.54138400 | 1.40283600 | -0.14327900 |
| C | -7.93501000 | 1.43205200 | -0.17074400 |
| C | -7.19844700 | 2.71859300 | -0.58217800 |
| C | -5.00045600 | 3.97939200 | -0.50764800 |
| C | -2.81052500 | 2.68965400 | -0.55473600 |
| C | -7.93517900 | 3.95159900 | -0.02325500 |
| C | -5.74211900 | 5.20374100 | 0.07113700  |
| C | -3.53151400 | 3.94974500 | -0.03874000 |
| C | -1.34987000 | 2.65728200 | -0.07200600 |
| C | -7.20110400 | 5.24402700 | -0.39852700 |
| H | -5.70385000 | 5.17822300 | 1.17644300  |
| C | -2.78036700 | 5.20646900 | -0.49802400 |
| C | -0.61552100 | 1.39908500 | -0.56508100 |
| C | -0.58593100 | 3.93293100 | -0.46477700 |
| H | -7.71686500 | 6.11429700 | 0.04806200  |
| C | -1.33726600 | 5.18778700 | -0.01177800 |
| H | -2.79114100 | 5.25376000 | -1.59600100 |
| C | 0.83868500  | 1.36614800 | -0.06375700 |
| C | 0.85300800  | 3.89696200 | 0.07206400  |
| H | -0.82948800 | 6.08600000 | -0.37523700 |
| C | 1.59816800  | 2.65103200 | -0.43478600 |
| C | 1.62676000  | 5.17580800 | -0.26157100 |

|   |             |             |             |
|---|-------------|-------------|-------------|
| C | 3.05371400  | 2.61522300  | 0.06351200  |
| C | 3.06583500  | 5.12638300  | 0.23451700  |
| H | 1.61681400  | 5.32444600  | -1.35268400 |
| C | 3.76892000  | 1.35857300  | -0.45377500 |
| C | 3.80067000  | 3.90390500  | -0.33085900 |
| H | 3.58421900  | 6.05474500  | -0.03555800 |
| C | 5.22393100  | 1.32487700  | 0.05896800  |
| C | 5.26527800  | 3.86649500  | 0.15094100  |
| C | 5.97976900  | 2.60126900  | -0.38199300 |
| C | 6.03161900  | 5.12450300  | -0.31180500 |
| C | 7.44182000  | 2.56735500  | 0.13018700  |
| H | 5.52971900  | 6.03523600  | 0.06682900  |
| C | 7.48699400  | 5.09875300  | 0.16957600  |
| C | 8.20307800  | 3.83205300  | -0.31293800 |
| C | 8.16038900  | 1.30926200  | -0.38732100 |
| H | 8.02040200  | 5.99606700  | -0.19558600 |
| C | 8.14066900  | -3.73293900 | -0.59824300 |
| C | 8.13956300  | -1.21174500 | -0.48201800 |
| C | 7.40222200  | -5.02035400 | -0.21453700 |
| C | 7.39904200  | -2.49315200 | -0.06156200 |
| C | 7.41040500  | 0.03680900  | 0.04427500  |
| C | 5.94830300  | -4.98548600 | -0.69987600 |
| H | 7.92219800  | -5.89619500 | -0.64528300 |
| C | 5.93780200  | -2.46389200 | -0.57637900 |
| C | 5.95179400  | 0.06841500  | -0.47403100 |
| C | 5.20041700  | -3.75432100 | -0.14421100 |
| H | 5.92161600  | -4.97368800 | -1.80588500 |
| C | 5.20229100  | -1.21300500 | -0.03888600 |
| C | 3.73748800  | -3.72910400 | -0.63251700 |
| C | 3.74756500  | -1.18285300 | -0.55299600 |
| C | 2.97962900  | -4.98168600 | -0.17325900 |
| C | 3.00978300  | -2.46421000 | -0.13761100 |
| C | 3.02334400  | 0.07614400  | -0.04940700 |
| C | 1.54205800  | -4.96463500 | -0.67616400 |
| H | 3.48320600  | -5.89302900 | -0.51875200 |
| C | 1.55524500  | -2.43554100 | -0.64023400 |
| C | 1.57312300  | 0.10841300  | -0.55451700 |
| C | 0.78793200  | -3.70603900 | -0.23845300 |
| H | 1.53507600  | -5.01947000 | -1.77602900 |
| C | 0.81562400  | -1.17224900 | -0.16941500 |
| C | -0.65091400 | -3.67443400 | -0.77519000 |
| C | -0.63661000 | -1.13977000 | -0.67649000 |
| C | -1.42611800 | -4.94502300 | -0.41545100 |
| C | -1.39440600 | -2.42022000 | -0.28778700 |
| C | -1.36780400 | 0.11663800  | -0.17840200 |
| C | -2.86255000 | -4.90492700 | -0.91905200 |
| H | -0.92931700 | -5.82669000 | -0.83111500 |
| C | -2.85211300 | -2.38869700 | -0.78025500 |
| C | -2.82329300 | 0.14936700  | -0.66827600 |
| C | -3.59818600 | -3.67415700 | -0.37461800 |

|   |             |             |             |
|---|-------------|-------------|-------------|
| H | -2.85826200 | -4.86900800 | -2.01753200 |
| C | -3.56417500 | -1.13329600 | -0.25491600 |
| C | -5.06193800 | -3.63970500 | -0.85955800 |
| C | -5.02238900 | -1.09836600 | -0.75981700 |
| C | -5.82817000 | -4.90029100 | -0.40372900 |
| C | -5.77620200 | -2.37679800 | -0.32100300 |
| C | -5.74712600 | 0.15330300  | -0.21129400 |
| C | -7.28367100 | -4.87143600 | -0.88477600 |
| H | -5.32686300 | -5.80879400 | -0.78806700 |
| C | -7.24009000 | -2.34031000 | -0.82711600 |
| C | -7.20971500 | 0.18984800  | -0.71763400 |
| C | -7.99975700 | -3.60879900 | -0.39184600 |
| H | -7.31631000 | -4.91636300 | -1.99028600 |
| C | -7.95700600 | -1.08723400 | -0.29488700 |
| H | 8.29673000  | 3.85173400  | -1.41515900 |
| H | 8.24552000  | 1.34553500  | -1.48939400 |
| H | 9.17593300  | -1.23213100 | -0.09869700 |
| H | 9.17231500  | -3.75645800 | -0.20246600 |
| H | -8.09101400 | -3.63633300 | 0.71034800  |
| H | -8.99540700 | -1.05813700 | -0.67168500 |
| H | -8.01153900 | 1.37289700  | 0.93095100  |
| H | -8.97059200 | 3.97934600  | -0.40870600 |
| H | 0.77298100  | -1.21085200 | 0.93591000  |
| H | 0.80289100  | 1.31652000  | 1.04091100  |
| H | -1.39648000 | 0.05577700  | 0.92400100  |
| H | 1.60902200  | 0.15403800  | -1.65942000 |
| H | -0.60169800 | -1.09405600 | -1.78138700 |
| H | -0.58363000 | 1.44818300  | -1.66962400 |
| H | 1.59279500  | -2.40730000 | -1.74580200 |
| H | 2.97479200  | -2.49977600 | 0.96544400  |
| H | 3.76162800  | -1.14365400 | -1.66206900 |
| H | 2.98457000  | 0.03305000  | 1.05313300  |
| H | 3.78172800  | 1.40705200  | -1.56248700 |
| H | 3.02223400  | 2.56328900  | 1.16571100  |
| H | 1.63235100  | 2.71157900  | -1.53913400 |
| H | 0.79447700  | 3.81858400  | 1.17291300  |
| H | -0.52888200 | 3.95563600  | -1.56801700 |
| H | -1.37408600 | 2.61394300  | 1.03443600  |
| H | 0.72924800  | -3.71987700 | 0.86520200  |
| H | -0.59308600 | -3.61718200 | -1.87735000 |
| H | -1.42813700 | -2.45285100 | 0.81701800  |
| H | -2.82736600 | -2.34225100 | -1.88321300 |
| H | -3.56153300 | -1.17910400 | 0.85215500  |
| H | -2.80051700 | 0.20100000  | -1.77101300 |
| H | -3.54232800 | 1.34801700  | 0.96572800  |
| H | -2.79071600 | 2.73640200  | -1.65739600 |
| H | 5.21042600  | 1.28446000  | 1.17415000  |
| H | 5.99490200  | 2.64186400  | -1.49652000 |
| H | 5.27524300  | 3.83824500  | 1.26702500  |
| H | 3.78853000  | 3.97183800  | -1.43720000 |

|   |             |             |             |
|---|-------------|-------------|-------------|
| H | 6.00202600  | 5.19787500  | -1.41535200 |
| H | 7.51988000  | 5.15317500  | 1.27463300  |
| H | 9.23562700  | 3.80849300  | 0.08044000  |
| H | 7.42709400  | 2.53727800  | 1.24651700  |
| H | 9.19711400  | 1.28325400  | -0.00532100 |
| H | 5.97148500  | 0.11113800  | -1.58862900 |
| H | 7.39267500  | -0.00495900 | 1.16037800  |
| H | 8.22598200  | -1.16588900 | -1.58364100 |
| H | 7.38228300  | -2.54713700 | 1.05381300  |
| H | 5.95512700  | -2.41840800 | -1.69071600 |
| H | 5.18780500  | -1.25798000 | 1.07607000  |
| H | 8.23729500  | -3.67033400 | -1.69860900 |
| H | 7.43033500  | -5.15855000 | 0.88331800  |
| H | 5.43067200  | -5.91424500 | -0.39324400 |
| H | 5.20579500  | -3.81202000 | 0.97068500  |
| H | 3.73019800  | -3.70537900 | -1.74074200 |
| H | -3.59055100 | -3.72782600 | 0.73317300  |
| H | -5.06997400 | -3.60664000 | -1.97541000 |
| H | -9.03294500 | -3.58294600 | -0.78320000 |
| H | -7.81678000 | -5.77181400 | -0.52719700 |
| H | -5.79859200 | -4.97938900 | 0.69925600  |
| H | -3.38148700 | -5.82972900 | -0.63764000 |
| H | -1.42184000 | -5.06508500 | 0.68021300  |
| H | 1.02995700  | -5.86024100 | -0.31272700 |
| H | 2.97738400  | -5.02151100 | 0.92516100  |
| H | -8.03607100 | -1.13390200 | 0.80726700  |
| H | -8.97448200 | 1.45648500  | -0.54503800 |
| H | -8.02090500 | 3.87538000  | 1.07708100  |
| H | -7.24041000 | 5.39539500  | -1.49434200 |
| H | -5.22785100 | 6.13616500  | -0.22987600 |
| H | -3.28037800 | 6.11518900  | -0.14046900 |
| H | -1.31869300 | 5.23617500  | 1.08843000  |
| H | 1.13053400  | 6.04543500  | 0.17937700  |
| H | 3.06731900  | 5.07398200  | 1.33238900  |
| H | -5.78641500 | -2.42037700 | 0.79368000  |
| H | -5.01604500 | -1.05053100 | -1.87443000 |
| H | -5.75658900 | 0.10022000  | 0.90329200  |
| H | -4.99929700 | 1.49563900  | -1.75532500 |
| H | -5.73814500 | 2.62530600  | 1.03170700  |
| H | -5.01966900 | 4.04982600  | -1.62181400 |
| H | -3.50942700 | 3.91652500  | 1.06925900  |
| H | -7.20074700 | 0.24434900  | -1.83323000 |
| H | -7.19227800 | 2.78613900  | -1.69694800 |
| H | -7.22985600 | -2.30036700 | -1.94309500 |
| C | -0.26223300 | -0.07403300 | 3.93659800  |
| C | -1.76680700 | 0.02286300  | 3.70784800  |
| C | -2.01723400 | -2.31065800 | 3.58350700  |
| C | -0.52873500 | -2.55865400 | 3.80335000  |
| C | 0.07942100  | -1.40688100 | 4.60725800  |
| H | -2.29394200 | 0.05314000  | 4.67697300  |



|   |             |             |            |
|---|-------------|-------------|------------|
| H | -2.03067600 | 0.92478400  | 3.14667300 |
| H | 0.24311600  | -0.01030100 | 2.96383500 |
| H | 0.07686600  | 0.77402000  | 4.54189100 |
| H | -2.54974100 | -2.33126500 | 4.54985000 |
| H | -2.45955700 | -3.07183900 | 2.93301500 |
| H | -0.38221900 | -3.51868300 | 4.31065400 |
| H | -0.03737100 | -2.62340300 | 2.82338800 |
| H | -0.33757200 | -1.41675400 | 5.62433500 |
| H | 1.16314200  | -1.52831700 | 4.70382900 |
| O | -2.24625700 | -1.06856400 | 2.94438800 |

#### Graphane-S6S

|   |             |            |             |
|---|-------------|------------|-------------|
| C | -5.01304200 | 1.46728700 | -0.69402800 |
| C | -5.74198500 | 2.70683100 | -0.12244700 |
| C | -3.55117800 | 1.42805800 | -0.20164000 |
| C | -7.94394600 | 1.45448300 | -0.21173700 |
| C | -7.21010200 | 2.74451000 | -0.61694100 |
| C | -5.01240000 | 4.00636300 | -0.54004400 |
| C | -2.82164300 | 2.71864800 | -0.60328400 |
| C | -7.94553200 | 3.97282800 | -0.04620700 |
| C | -5.75308300 | 5.22559400 | 0.05061900  |
| C | -3.54227300 | 3.97398600 | -0.07518700 |
| C | -1.36012800 | 2.68258000 | -0.12320100 |
| C | -7.21354500 | 5.26850700 | -0.41418200 |
| H | -5.71149900 | 5.19130900 | 1.15562900  |
| C | -2.79266000 | 5.23442000 | -0.52668600 |
| C | -0.62609400 | 1.42966000 | -0.63017000 |
| C | -0.59717000 | 3.96167100 | -0.50672100 |
| H | -7.72841600 | 6.13501300 | 0.04075100  |
| C | -1.34861100 | 5.21271900 | -0.04338800 |
| H | -2.80585700 | 5.29008600 | -1.62423700 |
| C | 0.82986200  | 1.39238300 | -0.13406700 |
| C | 0.84151100  | 3.92138500 | 0.03014200  |
| H | -0.84184700 | 6.11366300 | -0.40139000 |
| C | 1.58880800  | 2.68189500 | -0.48916200 |
| C | 1.61570500  | 5.20375700 | -0.28800600 |
| C | 3.04123700  | 2.64034200 | 0.01806300  |
| C | 3.05158000  | 5.15014100 | 0.21688200  |
| H | 1.61193100  | 5.36218900 | -1.37776000 |
| C | 3.76103400  | 1.39018500 | -0.50863300 |
| C | 3.79150400  | 3.93360100 | -0.35473100 |
| H | 3.57138400  | 6.08121700 | -0.04069200 |
| C | 5.21129000  | 1.34966100 | 0.01685000  |
| C | 5.25092700  | 3.89020500 | 0.14208100  |
| C | 5.97133500  | 2.63195900 | -0.39922400 |
| C | 6.02222100  | 5.15399900 | -0.29584700 |
| C | 7.42765800  | 2.59122500 | 0.12864100  |
| H | 5.51596900  | 6.05992500 | 0.08851400  |
| C | 7.47185900  | 5.12200700 | 0.20218800  |
| C | 8.19372500  | 3.86180700 | -0.28855300 |

|   |             |             |             |
|---|-------------|-------------|-------------|
| C | 8.15220200  | 1.34053100  | -0.39831500 |
| H | 8.00935100  | 6.02407400  | -0.14490500 |
| C | 8.13627000  | -3.69675400 | -0.69120300 |
| C | 8.13311600  | -1.17828900 | -0.53160800 |
| C | 7.39381500  | -4.99091700 | -0.33946500 |
| C | 7.38837300  | -2.46667600 | -0.14106000 |
| C | 7.39784900  | 0.06176700  | 0.00613900  |
| C | 5.94555600  | -4.94725100 | -0.84075700 |
| H | 7.91890700  | -5.85875400 | -0.78018800 |
| C | 5.93274600  | -2.42851600 | -0.67101200 |
| C | 5.94469400  | 0.10106300  | -0.52692300 |
| C | 5.19115100  | -3.72675400 | -0.27067900 |
| H | 5.93153300  | -4.91483300 | -1.94659200 |
| C | 5.19144600  | -1.18722700 | -0.11918900 |
| C | 3.73361100  | -3.69191800 | -0.77423900 |
| C | 3.74115300  | -1.14891900 | -0.64509100 |
| C | 2.97240400  | -4.95584200 | -0.35317800 |
| C | 3.00069200  | -2.43797500 | -0.25880300 |
| C | 3.01269100  | 0.10208000  | -0.12761000 |
| C | 1.53838800  | -4.92527100 | -0.86536200 |
| H | 3.47880200  | -5.85766000 | -0.71881500 |
| C | 1.54861900  | -2.40008800 | -0.76837000 |
| C | 1.56525300  | 0.14125800  | -0.64026500 |
| C | 0.78301300  | -3.67988000 | -0.39388000 |
| H | 1.53806500  | -4.94731500 | -1.96635200 |
| C | 0.80902500  | -1.14573600 | -0.27398400 |
| C | -0.65980600 | -3.63920900 | -0.91875500 |
| C | -0.64623900 | -1.10749200 | -0.77205200 |
| C | -1.42983400 | -4.91737900 | -0.57410000 |
| C | -1.40091800 | -2.39513300 | -0.40132500 |
| C | -1.37740600 | 0.14205100  | -0.25611800 |
| C | -2.87335400 | -4.87012100 | -1.05613000 |
| H | -0.93815400 | -5.78987900 | -1.01443300 |
| C | -2.86180200 | -2.35772600 | -0.88387900 |
| C | -2.83392100 | 0.18017900  | -0.74176100 |
| C | -3.60315200 | -3.64796500 | -0.48425500 |
| H | -2.88502000 | -4.81865600 | -2.15398400 |
| C | -3.57181800 | -1.10815900 | -0.34258500 |
| C | -5.07167300 | -3.61004700 | -0.95394700 |
| C | -5.03336300 | -1.06917800 | -0.83625600 |
| C | -5.83269100 | -4.87381400 | -0.49818200 |
| C | -5.78263400 | -2.35157400 | -0.40121000 |
| C | -5.75541100 | 0.17735200  | -0.27254000 |
| C | -7.29188400 | -4.84416600 | -0.96786100 |
| H | -5.33326800 | -5.78002700 | -0.89019300 |
| C | -7.25013900 | -2.31308900 | -0.89676200 |
| C | -7.22067500 | 0.21665100  | -0.77094900 |
| C | -8.00539700 | -3.58474100 | -0.46306800 |
| H | -7.33322800 | -4.88391700 | -2.07322700 |
| C | -7.96441900 | -1.06382100 | -0.35226000 |

|   |             |             |             |
|---|-------------|-------------|-------------|
| H | 8.30052000  | 3.89620200  | -1.38922400 |
| H | 8.25013300  | 1.39263900  | -1.49872500 |
| H | 9.16498900  | -1.20484100 | -0.13660200 |
| H | 9.16328800  | -3.72739900 | -0.28392600 |
| H | -8.08840400 | -3.61837100 | 0.63973500  |
| H | -9.00518500 | -1.03304500 | -0.72233400 |
| H | -8.01542900 | 1.38716900  | 0.88994200  |
| H | -8.98235200 | 4.00283100  | -0.42773300 |
| H | 0.77578200  | -1.20272000 | 0.83034600  |
| H | 0.79898200  | 1.33149000  | 0.96927000  |
| H | -1.40636700 | 0.07373800  | 0.84793800  |
| H | 1.60543200  | 0.20184500  | -1.74429700 |
| H | -0.61733900 | -1.04449900 | -1.87627300 |
| H | -0.59846700 | 1.48872500  | -1.73433800 |
| H | 1.58980200  | -2.34941900 | -1.87301300 |
| H | 2.95791500  | -2.49527900 | 0.84361700  |
| H | 3.76464600  | -1.09105500 | -1.75314000 |
| H | 2.96607100  | 0.04297400  | 0.97435000  |
| H | 3.78366000  | 1.45266600  | -1.61643500 |
| H | 3.00118300  | 2.57496800  | 1.11937000  |
| H | 1.62807400  | 2.75563000  | -1.59250500 |
| H | 0.78201200  | 3.83076100  | 1.13005800  |
| H | -0.54054200 | 3.99310600  | -1.60975500 |
| H | -1.38187800 | 2.62863500  | 0.98269000  |
| H | 0.73205000  | -3.72190300 | 0.70898400  |
| H | -0.61247900 | -3.56080200 | -2.02012500 |
| H | -1.42992400 | -2.45378900 | 0.70359000  |
| H | -2.84486500 | -2.29956800 | -1.98639100 |
| H | -3.56638100 | -1.17039700 | 0.76422000  |
| H | -2.81333500 | 0.24375400  | -1.84371000 |
| H | -3.54784400 | 1.36407600  | 0.90690800  |
| H | -2.80393300 | 2.77502600  | -1.70551600 |
| H | 5.18757600  | 1.29378300  | 1.13117800  |
| H | 5.99874600  | 2.68704200  | -1.51289800 |
| H | 5.24889700  | 3.84765600  | 1.25780000  |
| H | 3.79058400  | 4.01364100  | -1.46027600 |
| H | 6.00545200  | 5.24144800  | -1.39862400 |
| H | 7.49186300  | 5.16201700  | 1.30816800  |
| H | 9.22158600  | 3.83305800  | 0.11668900  |
| H | 7.40058700  | 2.54577700  | 1.24421400  |
| H | 9.18450800  | 1.30913000  | -0.00482900 |
| H | 5.97613300  | 0.16049500  | -1.64052200 |
| H | 7.36847000  | 0.00301300  | 1.12120000  |
| H | 8.23254200  | -1.11448900 | -1.63128400 |
| H | 7.35971300  | -2.53992800 | 0.97294500  |
| H | 5.96222800  | -2.36290100 | -1.78413700 |
| H | 5.16752500  | -1.25057400 | 0.99464200  |
| H | 8.24583300  | -3.61442100 | -1.78907500 |
| H | 7.40947900  | -5.14925100 | 0.75590400  |
| H | 5.42501300  | -5.88177600 | -0.55748100 |

|   |             |             |             |
|---|-------------|-------------|-------------|
| H | 5.18450100  | -3.80523300 | 0.84292300  |
| H | 3.73816700  | -3.64233600 | -1.88158000 |
| H | -3.58091700 | -3.71422600 | 0.62252900  |
| H | -5.09084100 | -3.57013800 | -2.06951500 |
| H | -9.04150800 | -3.55774000 | -0.84649700 |
| H | -7.82125000 | -5.74677400 | -0.61022900 |
| H | -5.79438000 | -4.95771300 | 0.60436300  |
| H | -3.38766000 | -5.79922400 | -0.78057600 |
| H | -1.40985400 | -5.05898600 | 0.51853700  |
| H | 1.02462900  | -5.83122600 | -0.53147500 |
| H | 2.96181400  | -5.02466200 | 0.74384000  |
| H | -8.03676000 | -1.11779900 | 0.75017200  |
| H | -8.98521800 | 1.48097000  | -0.58088400 |
| H | -8.02743600 | 3.88822200  | 1.05386800  |
| H | -7.25652800 | 5.42820400  | -1.50864700 |
| H | -5.24040800 | 6.16076100  | -0.24449100 |
| H | -3.29223900 | 6.14012100  | -0.16110800 |
| H | -1.32802700 | 5.25324700  | 1.05708400  |
| H | 1.11662300  | 6.06910000  | 0.15802200  |
| H | 3.04535300  | 5.08740000  | 1.31420700  |
| H | -5.78488300 | -2.40344000 | 0.71339100  |
| H | -5.03545600 | -1.01261900 | -1.95049700 |
| H | -5.75969800 | 0.11430500  | 0.84167400  |
| H | -5.01451200 | 1.53322800  | -1.80809400 |
| H | -5.74401000 | 2.63940500  | 0.99090100  |
| H | -5.03486700 | 4.08565100  | -1.65353100 |
| H | -3.51721600 | 3.93208900  | 1.03233300  |
| H | -7.21783200 | 0.27864500  | -1.88615500 |
| H | -7.20827800 | 2.82015800  | -1.73118500 |
| H | -7.24797900 | -2.26681100 | -2.01252300 |
| C | 0.12278000  | -0.04509200 | 3.69573900  |
| C | -1.29705200 | 0.04117300  | 4.24782400  |
| C | -1.30339600 | -2.70078500 | 4.17578800  |
| C | 0.11704500  | -2.59407600 | 3.62834100  |
| C | 0.84166600  | -1.33281400 | 4.10400000  |
| H | -1.28671700 | 0.02977100  | 5.34447400  |
| H | -1.78655500 | 0.96607600  | 3.92888000  |
| H | 0.07706300  | 0.01392500  | 2.60183700  |
| H | 0.69444800  | 0.82458500  | 4.04361900  |
| H | -1.29222900 | -2.74616200 | 5.27151100  |
| H | -1.79754200 | -3.60567300 | 3.81031100  |
| H | 0.68390900  | -3.48287900 | 3.93231400  |
| H | 0.07209900  | -2.59699500 | 2.53244200  |
| H | 0.93782100  | -1.36248300 | 5.19889000  |
| H | 1.86008900  | -1.32413400 | 3.69827200  |
| S | -2.36259700 | -1.31289900 | 3.65203200  |

#### Graphane-S5C

|   |             |            |             |
|---|-------------|------------|-------------|
| C | -5.12015100 | 1.47277600 | -0.47959100 |
| C | -5.85074100 | 2.70318800 | 0.10931600  |

|   |             |             |             |
|---|-------------|-------------|-------------|
| C | -3.65075500 | 1.44398700  | -0.01031500 |
| C | -8.04174400 | 1.43118800  | 0.05258700  |
| C | -7.32664100 | 2.72904700  | -0.36180000 |
| C | -5.13776400 | 4.01050200  | -0.31321100 |
| C | -2.93662300 | 2.74333000  | -0.41045000 |
| C | -8.06383000 | 3.94966700  | 0.22267400  |
| C | -5.88142300 | 5.22169000  | 0.28978500  |
| C | -3.66239600 | 3.98799400  | 0.13567600  |
| C | -1.47113200 | 2.71457700  | 0.05823100  |
| C | -7.34859900 | 5.25216000  | -0.15413400 |
| H | -5.82367500 | 5.18658600  | 1.39407600  |
| C | -2.92659100 | 5.25784100  | -0.31149100 |
| C | -0.72979000 | 1.47473100  | -0.47019300 |
| C | -0.72022600 | 4.00370100  | -0.31350900 |
| H | -7.86452700 | 6.11366100  | 0.30915400  |
| C | -1.47987700 | 5.24418000  | 0.16476900  |
| H | -2.94633300 | 5.32123100  | -1.40852600 |
| C | 0.72957100  | 1.43844600  | 0.01706000  |
| C | 0.72041400  | 3.96635700  | 0.21950000  |
| H | -0.98180100 | 6.15211100  | -0.18783600 |
| C | 1.47337500  | 2.74079000  | -0.32455700 |
| C | 1.48187900  | 5.26051900  | -0.08104200 |
| C | 2.93429700  | 2.70380000  | 0.15760700  |
| C | 2.92412900  | 5.20842300  | 0.40573900  |
| H | 1.46492000  | 5.44102600  | -1.16731000 |
| C | 3.65543600  | 1.47195800  | -0.40938400 |
| C | 3.66567900  | 4.01109300  | -0.20310700 |
| H | 3.43270900  | 6.14951800  | 0.16255700  |
| C | 5.11559900  | 1.43374200  | 0.08775400  |
| C | 5.13495200  | 3.97122500  | 0.26416800  |
| C | 5.85596600  | 2.73093000  | -0.31691900 |
| C | 5.88632900  | 5.25057200  | -0.16308800 |
| C | 7.32278300  | 2.69277200  | 0.18123700  |
| H | 5.38016800  | 6.14373600  | 0.25013500  |
| C | 7.34614100  | 5.22164700  | 0.30464300  |
| C | 8.06907300  | 3.97825200  | -0.22591300 |
| C | 8.04768100  | 1.45893400  | -0.38392900 |
| H | 7.86855400  | 6.13538100  | -0.03477500 |
| C | 8.06931800  | -3.57486000 | -0.75703700 |
| C | 8.04770100  | -1.05824100 | -0.56113100 |
| C | 7.34484000  | -4.87999200 | -0.40798500 |
| C | 7.32172000  | -2.35894800 | -0.17591800 |
| C | 7.31260700  | 0.16623100  | 0.01156000  |
| C | 5.88684000  | -4.84273000 | -0.88072000 |
| H | 7.86873800  | -5.73751900 | -0.86971400 |
| C | 5.85621500  | -2.32613500 | -0.67821900 |
| C | 5.84946400  | 0.20226100  | -0.49349500 |
| C | 5.13327200  | -3.63595100 | -0.28111200 |
| H | 5.85113500  | -4.79699100 | -1.98556400 |
| C | 5.11484400  | -1.09946400 | -0.09502500 |

|   |             |             |             |
|---|-------------|-------------|-------------|
| C | 3.66650800  | -3.60808300 | -0.75701800 |
| C | 3.65584800  | -1.06459600 | -0.59590700 |
| C | 2.92161500  | -4.87978600 | -0.33036900 |
| C | 2.93292800  | -2.36536600 | -0.21727600 |
| C | 2.92621100  | 0.16972200  | -0.04128200 |
| C | 1.48206900  | -4.86035500 | -0.82747800 |
| H | 3.43151300  | -5.77684600 | -0.70277500 |
| C | 1.47379600  | -2.33247900 | -0.70557800 |
| C | 1.46916400  | 0.20520900  | -0.52587700 |
| C | 0.72131100  | -3.62318600 | -0.34436400 |
| H | 1.47097300  | -4.88045800 | -1.92858400 |
| C | 0.73117200  | -1.09557500 | -0.17353600 |
| C | -0.72334000 | -3.58433100 | -0.86523000 |
| C | -0.73125300 | -1.05943300 | -0.65165500 |
| C | -1.47746200 | -4.88255100 | -0.56210000 |
| C | -1.47013400 | -2.36276300 | -0.30358200 |
| C | -1.46682300 | 0.17641500  | -0.10819700 |
| C | -2.93161600 | -4.82899600 | -1.01128800 |
| H | -0.98561900 | -5.72836600 | -1.05170400 |
| C | -2.93951100 | -2.32695600 | -0.75685600 |
| C | -2.93035400 | 0.20709100  | -0.57128100 |
| C | -3.65830300 | -3.63547100 | -0.37707700 |
| H | -2.96890700 | -4.73508200 | -2.10571700 |
| C | -3.64895800 | -1.09398200 | -0.17831300 |
| C | -5.14059800 | -3.60006800 | -0.80084500 |
| C | -5.12054100 | -1.06172700 | -0.64049100 |
| C | -5.87669000 | -4.87788400 | -0.34330600 |
| C | -5.84789200 | -2.35730100 | -0.20828600 |
| C | -5.84298200 | 0.17333500  | -0.05276400 |
| C | -7.34902200 | -4.85568500 | -0.77046500 |
| H | -5.37981200 | -5.77291000 | -0.76378200 |
| C | -7.32720500 | -2.32580700 | -0.66875200 |
| C | -7.31758100 | 0.20193800  | -0.52372100 |
| C | -8.05980100 | -3.60908900 | -0.23089600 |
| H | -7.42179000 | -4.88311000 | -1.87465700 |
| C | -8.04008700 | -1.08801300 | -0.09710900 |
| H | 8.15311800  | 4.03539700  | -1.32757800 |
| H | 8.12296000  | 1.53241800  | -1.48483500 |
| H | 9.08749200  | -1.08196600 | -0.18734000 |
| H | 9.10426800  | -3.60190100 | -0.37015100 |
| H | -8.11400100 | -3.65710700 | 0.87305800  |
| H | -9.08941700 | -1.06407700 | -0.44317400 |
| H | -8.09372300 | 1.36031500  | 1.15500000  |
| H | -9.10658400 | 3.97156800  | -0.14300300 |
| H | 0.71588300  | -1.17803300 | 0.92958600  |
| H | 0.70684400  | 1.34844100  | 1.11990000  |
| H | -1.47630500 | 0.10264200  | 0.99497100  |
| H | 1.48889100  | 0.28892500  | -1.62901700 |
| H | -0.71681800 | -0.97449600 | -1.75443000 |
| H | -0.70903900 | 1.54919800  | -1.57346100 |

|   |             |             |             |
|---|-------------|-------------|-------------|
| H | 1.49895700  | -2.25944700 | -1.80948500 |
| H | 2.90797000  | -2.43524300 | 0.88491300  |
| H | 3.65910600  | -0.98699900 | -1.70304000 |
| H | 2.90295300  | 0.08792400  | 1.05949500  |
| H | 3.65618300  | 1.55837500  | -1.51588100 |
| H | 2.91576300  | 2.61521300  | 1.25766300  |
| H | 1.49655700  | 2.83107900  | -1.42729100 |
| H | 0.66563600  | 3.85762300  | 1.31774100  |
| H | -0.66622600 | 4.04812900  | -1.41626600 |
| H | -1.48521400 | 2.64737800  | 1.16269300  |
| H | 0.67084300  | -3.67324900 | 0.75804900  |
| H | -0.68167200 | -3.46807700 | -1.96334300 |
| H | -1.47636800 | -2.45935700 | 0.79947400  |
| H | -2.94459000 | -2.24121700 | -1.85736000 |
| H | -3.62148300 | -1.17473600 | 0.92886800  |
| H | -2.92739000 | 0.28051500  | -1.67245300 |
| H | -3.63065900 | 1.37310600  | 1.09718500  |
| H | -2.93023200 | 2.80864800  | -1.51226000 |
| H | 5.11332100  | 1.35591700  | 1.20116100  |
| H | 5.86087500  | 2.80882700  | -1.42953000 |
| H | 5.15525800  | 3.90600700  | 1.37860200  |
| H | 3.64276800  | 4.11299400  | -1.30669600 |
| H | 5.84632400  | 5.36032700  | -1.26326100 |
| H | 7.38830000  | 5.23942000  | 1.41061600  |
| H | 9.10515100  | 3.95091800  | 0.15791400  |
| H | 7.31818900  | 2.62538500  | 1.29606400  |
| H | 9.08787500  | 1.42957100  | -0.01166900 |
| H | 5.85920900  | 0.28239000  | -1.60610200 |
| H | 7.30463200  | 0.08769500  | 1.12585400  |
| H | 8.12417600  | -0.97618700 | -1.66134800 |
| H | 7.31430300  | -2.44830900 | 0.93734900  |
| H | 5.86400100  | -2.24523600 | -1.79059200 |
| H | 5.11002800  | -1.18098700 | 1.01811700  |
| H | 8.15659200  | -3.47712000 | -1.85559200 |
| H | 7.38286400  | -5.05204500 | 0.68481700  |
| H | 5.37947200  | -5.78497000 | -0.59889200 |
| H | 5.14812500  | -3.72848800 | 0.83142200  |
| H | 3.64982200  | -3.55035800 | -1.86393400 |
| H | -3.60149200 | -3.73920700 | 0.72565600  |
| H | -5.19338000 | -3.54239700 | -1.91472800 |
| H | -9.10589600 | -3.58679400 | -0.58685500 |
| H | -7.85988300 | -5.76742600 | -0.40885300 |
| H | -5.80584800 | -4.97929200 | 0.75609000  |
| H | -3.43265400 | -5.77209800 | -0.76035000 |
| H | -1.43415700 | -5.07620100 | 0.52154900  |
| H | 0.97832300  | -5.77067500 | -0.48970700 |
| H | 2.92357300  | -4.95042200 | 0.76691400  |
| H | -8.08729500 | -1.15092100 | 1.00598300  |
| H | -9.08958000 | 1.44956700  | -0.29833700 |
| H | -8.12824600 | 3.86269600  | 1.32370500  |

|   |             |             |             |
|---|-------------|-------------|-------------|
| H | -7.40865300 | 5.41292200  | -1.24767400 |
| H | -5.38143200 | 6.16196700  | -0.01115300 |
| H | -3.43148300 | 6.15664400  | 0.06350900  |
| H | -1.45469700 | 5.27536000  | 1.26537700  |
| H | 0.98040700  | 6.11234900  | 0.38782900  |
| H | 2.93254000  | 5.12082500  | 1.50127400  |
| H | -5.82358700 | -2.42806200 | 0.90446000  |
| H | -5.14468600 | -0.99285300 | -1.75433600 |
| H | -5.82655300 | 0.10292100  | 1.06040700  |
| H | -5.13993900 | 1.54442400  | -1.59318300 |
| H | -5.83489300 | 2.63133600  | 1.22225500  |
| H | -5.17351700 | 4.09316900  | -1.42602700 |
| H | -3.62542300 | 3.93664100  | 1.24242700  |
| H | -7.33585500 | 0.26851100  | -1.63868200 |
| H | -7.34325200 | 2.80691300  | -1.47581200 |
| H | -7.35131400 | -2.26871400 | -1.78395000 |
| C | 0.95712100  | -1.61746600 | 3.87584400  |
| C | -0.53865300 | -1.32210500 | 3.68599900  |
| C | -1.22266100 | -2.59390700 | 4.19333300  |
| C | -0.34180300 | -3.70675800 | 3.61167400  |
| C | 1.10014900  | -3.15040300 | 3.67979600  |
| H | 1.58769400  | -1.04441400 | 3.18747500  |
| H | 1.25911800  | -1.33923000 | 4.89138500  |
| H | -0.76181000 | -1.19896000 | 2.61863000  |
| H | -0.86470500 | -0.41217500 | 4.19874400  |
| H | -1.19126300 | -2.62026600 | 5.28999600  |
| H | -2.27062300 | -2.67363500 | 3.88682600  |
| H | -0.45250800 | -4.66071000 | 4.13468500  |
| H | -0.62857900 | -3.87784500 | 2.56607900  |
| H | 1.65194100  | -3.59594800 | 4.51276800  |
| H | 1.65957200  | -3.39138300 | 2.76947100  |

#### Graphane-S5N

|   |             |            |             |
|---|-------------|------------|-------------|
| C | -5.11445200 | 1.37780700 | -0.51900500 |
| C | -5.84686000 | 2.62339800 | 0.03467200  |
| C | -3.64604500 | 1.36025700 | -0.04506800 |
| C | -8.03931200 | 1.35179700 | -0.00269000 |
| C | -7.32060400 | 2.63871600 | -0.44387900 |
| C | -5.13194500 | 3.91933600 | -0.41829000 |
| C | -2.93137500 | 2.64871300 | -0.47809100 |
| C | -8.05970800 | 3.87345600 | 0.10784100  |
| C | -5.87657500 | 5.14547700 | 0.15262400  |
| C | -3.65741800 | 3.90750200 | 0.03374700  |
| C | -1.46622400 | 2.63173100 | -0.00828400 |
| C | -7.34219600 | 5.16626200 | -0.29703800 |
| H | -5.82254200 | 5.13716200 | 1.25752900  |
| C | -2.92091100 | 5.16539700 | -0.44503000 |
| C | -0.72583800 | 1.37639500 | -0.50013000 |
| C | -0.71557000 | 3.91079400 | -0.41410400 |
| H | -7.85922500 | 6.03881000 | 0.14369800  |



|   |             |             |             |
|---|-------------|-------------|-------------|
| C | -1.47447600 | 5.16358900  | 0.03220300  |
| H | -2.93947800 | 5.20035600  | -1.54334500 |
| C | 0.73307500  | 1.35705700  | -0.01097800 |
| C | 0.72635500  | 3.88809400  | 0.11627000  |
| H | -0.97614500 | 6.06230100  | -0.34312100 |
| C | 1.47714400  | 2.64705500  | -0.39451900 |
| C | 1.48653700  | 5.17370900  | -0.22193500 |
| C | 2.93997200  | 2.62442200  | 0.08247200  |
| C | 2.93191100  | 5.13454600  | 0.25703600  |
| H | 1.46350400  | 5.32574800  | -1.31242400 |
| C | 3.65710100  | 1.37422700  | -0.44789400 |
| C | 3.66879100  | 3.91993700  | -0.32261100 |
| H | 3.43917100  | 6.06822300  | -0.01586400 |
| C | 5.12164700  | 1.35358900  | 0.03786500  |
| C | 5.14244500  | 3.89461200  | 0.13190000  |
| C | 5.85756600  | 2.63643500  | -0.41719300 |
| C | 5.88902900  | 5.16004300  | -0.34271200 |
| C | 7.33002100  | 2.61423000  | 0.06491500  |
| H | 5.38722700  | 6.06550000  | 0.04845800  |
| C | 7.35409800  | 5.14542300  | 0.10896300  |
| C | 8.07106800  | 3.88611700  | -0.39139100 |
| C | 8.04825400  | 1.36262100  | -0.46891400 |
| H | 7.87234700  | 6.04817800  | -0.26445900 |
| C | 8.06642800  | -3.68310800 | -0.65578400 |
| C | 8.04653900  | -1.16008600 | -0.55785900 |
| C | 7.34924700  | -4.97323000 | -0.24146600 |
| C | 7.32757100  | -2.44503100 | -0.11143800 |
| C | 7.31904600  | 0.08436100  | -0.01950400 |
| C | 5.88291400  | -4.95543000 | -0.68894500 |
| H | 7.86548500  | -5.84854900 | -0.67770100 |
| C | 5.85444000  | -2.43276500 | -0.59190800 |
| C | 5.84965600  | 0.10215800  | -0.50691500 |
| C | 5.13902400  | -3.72443200 | -0.12738200 |
| H | 5.82734500  | -4.95598300 | -1.79393000 |
| C | 5.12027100  | -1.18314800 | -0.05022500 |
| C | 3.66395500  | -3.71858000 | -0.57814800 |
| C | 3.65579500  | -1.16917500 | -0.53667800 |
| C | 2.92595700  | -4.96479200 | -0.07187200 |
| C | 2.93731700  | -2.45062200 | -0.09124400 |
| C | 2.93051000  | 0.08659700  | -0.02789100 |
| C | 1.48162700  | -4.97420500 | -0.55523900 |
| H | 3.43324500  | -5.88148100 | -0.39738700 |
| C | 1.47389800  | -2.44038300 | -0.56773800 |
| C | 1.47079600  | 0.10309600  | -0.50598700 |
| C | 0.72050900  | -3.71141300 | -0.14227900 |
| H | 1.46186600  | -5.05962200 | -1.65308100 |
| C | 0.72864100  | -1.17944000 | -0.09932500 |
| C | -0.71803100 | -3.69769200 | -0.68179600 |
| C | -0.72688400 | -1.16376600 | -0.59776400 |
| C | -1.47811400 | -4.97703300 | -0.32093000 |

|   |             |             |             |
|---|-------------|-------------|-------------|
| C | -1.46821900 | -2.44879200 | -0.19203800 |
| C | -1.46252300 | 0.08989700  | -0.09839100 |
| C | -2.92369100 | -4.94596600 | -0.79928900 |
| H | -0.97986500 | -5.85019000 | -0.75299200 |
| C | -2.93244900 | -2.43299200 | -0.66303900 |
| C | -2.92407500 | 0.10811600  | -0.56816800 |
| C | -3.65884900 | -3.72263500 | -0.23669200 |
| H | -2.94014100 | -4.90518200 | -1.89747200 |
| C | -3.64571700 | -1.17888400 | -0.13721900 |
| C | -5.13422500 | -3.70334900 | -0.68597000 |
| C | -5.11517400 | -1.16088800 | -0.60881200 |
| C | -5.87876100 | -4.96588600 | -0.20078200 |
| C | -5.84807100 | -2.44181100 | -0.14319000 |
| C | -5.84074600 | 0.09084100  | -0.06149400 |
| C | -7.34476500 | -4.95496300 | -0.64957000 |
| H | -5.37730400 | -5.87349200 | -0.58751700 |
| C | -7.32212100 | -2.42317600 | -0.62067600 |
| C | -7.31204300 | 0.10817900  | -0.54350800 |
| C | -8.06151100 | -3.69300300 | -0.15567000 |
| H | -7.40141000 | -5.01322300 | -1.75352300 |
| C | -8.04006800 | -1.16971900 | -0.09074900 |
| H | 8.14145500  | 3.90874500  | -1.49525400 |
| H | 8.10779900  | 1.39901800  | -1.57260100 |
| H | 9.09227500  | -1.16936200 | -0.20063100 |
| H | 9.10796500  | -3.69417500 | -0.28634900 |
| H | -8.13021400 | -3.70916300 | 0.94830900  |
| H | -9.08538000 | -1.15439700 | -0.44917800 |
| H | -8.09880900 | 1.30802700  | 1.10066800  |
| H | -9.10080200 | 3.88699300  | -0.26289100 |
| H | 0.68114700  | -1.20704900 | 1.00477000  |
| H | 0.70702900  | 1.30725400  | 1.09462400  |
| H | -1.46746600 | 0.03385400  | 1.00425000  |
| H | 1.48842100  | 0.14331100  | -1.61181500 |
| H | -0.70319200 | -1.12390900 | -1.70369600 |
| H | -0.70307800 | 1.41972800  | -1.60522100 |
| H | 1.49558800  | -2.42495100 | -1.67426900 |
| H | 2.92691300  | -2.46842700 | 1.01283900  |
| H | 3.64698500  | -1.14067000 | -1.64613000 |
| H | 2.91585900  | 0.04625500  | 1.07534900  |
| H | 3.64862500  | 1.42210600  | -1.55670500 |
| H | 2.92626700  | 2.57048100  | 1.18515500  |
| H | 1.49679300  | 2.70426000  | -1.49946800 |
| H | 0.67393500  | 3.80974700  | 1.21744200  |
| H | -0.66333000 | 3.92602300  | -1.51771800 |
| H | -1.48201400 | 2.59535400  | 1.09829000  |
| H | 0.65783300  | -3.70244300 | 0.96191800  |
| H | -0.65943500 | -3.64219700 | -1.78409300 |
| H | -1.47877100 | -2.47474900 | 0.91224800  |
| H | -2.92968100 | -2.39123600 | -1.76626000 |
| H | -3.62510500 | -1.22026800 | 0.97225000  |

|   |             |             |             |
|---|-------------|-------------|-------------|
| H | -2.92011100 | 0.14833600  | -1.67126700 |
| H | -3.62847400 | 1.32026600  | 1.06458300  |
| H | -2.92370500 | 2.68440500  | -1.58121300 |
| H | 5.12911400  | 1.31405500  | 1.15317400  |
| H | 5.84960300  | 2.67824200  | -1.53171700 |
| H | 5.17355800  | 3.86433400  | 1.24746600  |
| H | 3.63619200  | 3.98939700  | -1.42850300 |
| H | 5.83656300  | 5.23587200  | -1.44523500 |
| H | 7.40892100  | 5.19717600  | 1.21326400  |
| H | 9.11176700  | 3.87070800  | -0.01970800 |
| H | 7.33836300  | 2.58241500  | 1.18128300  |
| H | 9.09354200  | 1.34591100  | -0.11061700 |
| H | 5.84503800  | 0.14085400  | -1.62170700 |
| H | 7.32524400  | 0.04506200  | 1.09687500  |
| H | 8.10465100  | -1.11960300 | -1.66147100 |
| H | 7.33736900  | -2.49067900 | 1.00444800  |
| H | 5.84471800  | -2.39935300 | -1.70666800 |
| H | 5.12734200  | -1.22043800 | 1.06521400  |
| H | 8.13426500  | -3.62984600 | -1.75875000 |
| H | 7.40703400  | -5.10098900 | 0.85646500  |
| H | 5.38069400  | -5.88475100 | -0.35904800 |
| H | 5.17343700  | -3.76974000 | 0.98753200  |
| H | 3.62814100  | -3.71921500 | -1.68615300 |
| H | -3.62141500 | -3.77546200 | 0.87053100  |
| H | -5.16876500 | -3.68071900 | -1.80170500 |
| H | -9.10272900 | -3.68038900 | -0.52605600 |
| H | -7.86185400 | -5.85574700 | -0.27004000 |
| H | -5.82355500 | -5.03445400 | 0.90186600  |
| H | -3.43060300 | -5.87569500 | -0.51224600 |
| H | -1.45548700 | -5.10806900 | 0.77299100  |
| H | 0.98130100  | -5.86380700 | -0.16110300 |
| H | 2.93942400  | -4.97134800 | 1.02740300  |
| H | -8.09952700 | -1.20303800 | 1.01295500  |
| H | -9.08463400 | 1.36211600  | -0.36128800 |
| H | -8.12892000 | 3.81295600  | 1.21028500  |
| H | -7.39809200 | 5.30091800  | -1.39432200 |
| H | -5.37468900 | 6.07769600  | -0.16948900 |
| H | -3.42614900 | 6.07372100  | -0.09395700 |
| H | -1.44971100 | 5.22287300  | 1.13173500  |
| H | 0.98780100  | 6.03776500  | 0.22723200  |
| H | 2.94756000  | 5.07774900  | 1.35456100  |
| H | -5.83638100 | -2.47653100 | 0.97134600  |
| H | -5.13197300 | -1.12495600 | -1.72421400 |
| H | -5.83218000 | 0.05147600  | 1.05311300  |
| H | -5.12995300 | 1.42009100  | -1.63420400 |
| H | -5.83595500 | 2.58012000  | 1.14899600  |
| H | -5.16507400 | 3.97420500  | -1.53294500 |
| H | -3.62262800 | 3.88544200  | 1.14170000  |
| H | -7.32195600 | 0.14711900  | -1.65985400 |
| H | -7.33159700 | 2.69005600  | -1.55951100 |

|   |             |             |             |
|---|-------------|-------------|-------------|
| H | -7.33373200 | -2.39692100 | -1.73716700 |
| C | -0.51198400 | -0.11430600 | 3.80399400  |
| C | -0.52309100 | -2.43327100 | 3.77875400  |
| C | 0.96751100  | -2.05776900 | 3.79487000  |
| C | 0.97510400  | -0.50792800 | 3.82868900  |
| H | -0.70356000 | 0.80152800  | 3.23349800  |
| H | -0.87566900 | 0.04220000  | 4.83417100  |
| H | -0.87860700 | -2.60189900 | 4.81009400  |
| H | -0.73221900 | -3.33631500 | 3.19486800  |
| H | 1.48486700  | -2.50060300 | 4.64916800  |
| H | 1.45676200  | -2.42247800 | 2.88642000  |
| H | 1.47913500  | -0.11007900 | 4.71259200  |
| H | 1.48765300  | -0.10766000 | 2.94857200  |
| N | -1.14221000 | -1.26412900 | 3.15852100  |
| H | -2.15327900 | -1.26000100 | 3.27251700  |

#### Graphane-S5O

|   |             |            |             |
|---|-------------|------------|-------------|
| C | -5.11791700 | 1.37477000 | -0.51909400 |
| C | -5.85356200 | 2.62181500 | 0.02707900  |
| C | -3.65246200 | 1.35836000 | -0.03624400 |
| C | -8.04545100 | 1.35021900 | -0.01892400 |
| C | -7.32431600 | 2.63563300 | -0.46052400 |
| C | -5.13568400 | 3.91675400 | -0.42401700 |
| C | -2.93550400 | 2.64622500 | -0.46779700 |
| C | -8.06688800 | 3.87209000 | 0.08268300  |
| C | -5.88427700 | 5.14432000 | 0.13857300  |
| C | -3.66451300 | 3.90552500 | 0.03881700  |
| C | -1.47250700 | 2.63003400 | 0.00891600  |
| C | -7.34678400 | 5.16372300 | -0.32124900 |
| H | -5.83803000 | 5.13854700 | 1.24390000  |
| C | -2.92492200 | 5.16366900 | -0.43470800 |
| C | -0.73094600 | 1.37429900 | -0.48006500 |
| C | -0.72062100 | 3.90902700 | -0.39468200 |
| H | -7.86683400 | 6.03750300 | 0.11337400  |
| C | -1.48103500 | 5.16130000 | 0.05021000  |
| H | -2.93725200 | 5.19980000 | -1.53308600 |
| C | 0.72906100  | 1.35584600 | 0.00654000  |
| C | 0.72066600  | 3.88611600 | 0.13731600  |
| H | -0.98071600 | 6.06052600 | -0.32123000 |
| C | 1.47166300  | 2.64666700 | -0.37694500 |
| C | 1.48008500  | 5.17324900 | -0.19698000 |
| C | 2.93596900  | 2.62381600 | 0.09528000  |
| C | 2.92668200  | 5.13288000 | 0.27817600  |
| H | 1.45449200  | 5.32999900 | -1.28673300 |
| C | 3.65174600  | 1.37551000 | -0.44120400 |
| C | 3.66230000  | 3.92104700 | -0.30876400 |
| H | 3.43273000  | 6.06788800 | 0.00773500  |
| C | 5.11863200  | 1.35460900 | 0.03719300  |
| C | 5.13808300  | 3.89519300 | 0.13863900  |
| C | 5.85121800  | 2.63923300 | -0.41814400 |

|   |             |             |             |
|---|-------------|-------------|-------------|
| C | 5.88135700  | 5.16266300  | -0.33566100 |
| C | 7.32631900  | 2.61650000  | 0.05576900  |
| H | 5.38117800  | 6.06647100  | 0.06140500  |
| C | 7.34891000  | 5.14744000  | 0.10781400  |
| C | 8.06389300  | 3.89028800  | -0.40071500 |
| C | 8.04228400  | 1.36695800  | -0.48591000 |
| H | 7.86450800  | 6.05176900  | -0.26551300 |
| C | 8.06231700  | -3.67869300 | -0.68484800 |
| C | 8.04154200  | -1.15570700 | -0.58166100 |
| C | 7.34908400  | -4.97001400 | -0.26743100 |
| C | 7.32652500  | -2.44208100 | -0.13314800 |
| C | 7.31670200  | 0.08697400  | -0.03574500 |
| C | 5.87944500  | -4.95258400 | -0.70397600 |
| H | 7.86269300  | -5.84423300 | -0.70899100 |
| C | 5.85016700  | -2.43015700 | -0.60372200 |
| C | 5.84447400  | 0.10496100  | -0.51450500 |
| C | 5.13907100  | -3.72278100 | -0.13519900 |
| H | 5.81577200  | -4.95169000 | -1.80856200 |
| C | 5.11869900  | -1.18167000 | -0.05594500 |
| C | 3.66050800  | -3.71825000 | -0.57409500 |
| C | 3.65153500  | -1.16821000 | -0.53392300 |
| C | 2.92736400  | -4.96365900 | -0.05878000 |
| C | 2.93671900  | -2.44992800 | -0.08372000 |
| C | 2.92810500  | 0.08654600  | -0.02012500 |
| C | 1.47912500  | -4.97537200 | -0.53010000 |
| H | 3.43252700  | -5.88078300 | -0.38619700 |
| C | 1.46999300  | -2.44149800 | -0.54985100 |
| C | 1.46609200  | 0.10258200  | -0.49086200 |
| C | 0.71999600  | -3.71161100 | -0.11617100 |
| H | 1.45035400  | -5.06460300 | -1.62737000 |
| C | 0.72570200  | -1.17998500 | -0.08120500 |
| C | -0.72184200 | -3.70082100 | -0.64728300 |
| C | -0.73171100 | -1.16601900 | -0.57461400 |
| C | -1.48113500 | -4.97779500 | -0.27674400 |
| C | -1.47276400 | -2.44943600 | -0.16446100 |
| C | -1.46880300 | 0.08803300  | -0.07878300 |
| C | -2.92562800 | -4.95087900 | -0.75876600 |
| H | -0.98163000 | -5.85424500 | -0.70056200 |
| C | -2.93620400 | -2.43615500 | -0.63860500 |
| C | -2.92870400 | 0.10471900  | -0.55380400 |
| C | -3.66339300 | -3.72395700 | -0.20723800 |
| H | -2.93857700 | -4.91889900 | -1.85733100 |
| C | -3.65132400 | -1.18047200 | -0.11780900 |
| C | -5.13619700 | -3.70750300 | -0.66496500 |
| C | -5.11767400 | -1.16456600 | -0.59903200 |
| C | -5.88307600 | -4.96772200 | -0.17725800 |
| C | -5.85292500 | -2.44349300 | -0.13165100 |
| C | -5.84644000 | 0.08927200  | -0.06083500 |
| C | -7.34681700 | -4.95914600 | -0.63354200 |
| H | -5.37981300 | -5.87738500 | -0.55630800 |

|   |             |             |             |
|---|-------------|-------------|-------------|
| C | -7.32450600 | -2.42724300 | -0.61656800 |
| C | -7.31508200 | 0.10447900  | -0.55071800 |
| C | -8.06597400 | -3.69493700 | -0.14897000 |
| H | -7.39794400 | -5.02247200 | -1.73744900 |
| C | -8.04515700 | -1.17149700 | -0.09579900 |
| H | 8.12799000  | 3.91656800  | -1.50490600 |
| H | 8.09544000  | 1.40657000  | -1.58982200 |
| H | 9.08967700  | -1.16497600 | -0.23141000 |
| H | 9.10653300  | -3.68964400 | -0.32301700 |
| H | -8.13910600 | -3.70572000 | 0.95489900  |
| H | -9.08884100 | -1.15795600 | -0.45874500 |
| H | -8.11086700 | 1.31036700  | 1.08435600  |
| H | -9.10558200 | 3.88446500  | -0.29463000 |
| H | 0.68342900  | -1.20608700 | 1.02359000  |
| H | 0.70735400  | 1.30524700  | 1.11236900  |
| H | -1.48467600 | 0.03386200  | 1.02344900  |
| H | 1.47833400  | 0.14205100  | -1.59662900 |
| H | -0.70971400 | -1.12931800 | -1.68039600 |
| H | -0.70824600 | 1.41621900  | -1.58514100 |
| H | 1.48402600  | -2.42856500 | -1.65637500 |
| H | 2.93480200  | -2.46710000 | 1.02049600  |
| H | 3.63585200  | -1.13947300 | -1.64320000 |
| H | 2.91949900  | 0.04438100  | 1.08325300  |
| H | 3.63755800  | 1.42556000  | -1.54980200 |
| H | 2.92638100  | 2.56689300  | 1.19794600  |
| H | 1.48809600  | 2.70531700  | -1.48182900 |
| H | 0.66779900  | 3.80471100  | 1.23828600  |
| H | -0.66630100 | 3.92472600  | -1.49819800 |
| H | -1.49333300 | 2.59473500  | 1.11549500  |
| H | 0.66676900  | -3.69919900 | 0.98871000  |
| H | -0.66755700 | -3.65199500 | -1.75005600 |
| H | -1.49102900 | -2.47013700 | 0.93936000  |
| H | -2.92975500 | -2.40001300 | -1.74209200 |
| H | -3.63331900 | -1.21716500 | 0.99084400  |
| H | -2.92014600 | 0.14162900  | -1.65706400 |
| H | -3.64141500 | 1.31940000  | 1.07300000  |
| H | -2.92172300 | 2.68085300  | -1.57094200 |
| H | 5.13194800  | 1.31234600  | 1.15233500  |
| H | 5.83718600  | 2.68443000  | -1.53248700 |
| H | 5.17476800  | 3.86147500  | 1.25390900  |
| H | 3.62447400  | 3.99407300  | -1.41424100 |
| H | 5.82279800  | 5.24239600  | -1.43763100 |
| H | 7.40992200  | 5.19567200  | 1.21196900  |
| H | 9.10672800  | 3.87444800  | -0.03507100 |
| H | 7.34094000  | 2.58131700  | 1.17197200  |
| H | 9.08973000  | 1.35002400  | -0.13386600 |
| H | 5.83336900  | 0.14596100  | -1.62917800 |
| H | 7.32957800  | 0.04475200  | 1.08048200  |
| H | 8.09249900  | -1.11279700 | -1.68554500 |
| H | 7.34391400  | -2.48993100 | 0.98257000  |

|   |             |             |             |
|---|-------------|-------------|-------------|
| H | 5.83293600  | -2.39581800 | -1.71836100 |
| H | 5.13250500  | -1.22068900 | 1.05938100  |
| H | 8.12222100  | -3.62361700 | -1.78821400 |
| H | 7.41522100  | -5.09970800 | 0.82982100  |
| H | 5.38033900  | -5.88275600 | -0.37176700 |
| H | 5.18253400  | -3.76933900 | 0.97936400  |
| H | 3.61545300  | -3.72110600 | -1.68168800 |
| H | -3.63198400 | -3.76886400 | 0.90004900  |
| H | -5.16492500 | -3.69032700 | -1.78087300 |
| H | -9.10555000 | -3.68417700 | -0.52372900 |
| H | -7.86568000 | -5.85810700 | -0.25222100 |
| H | -5.83366500 | -5.02990300 | 0.92620200  |
| H | -3.43235900 | -5.87889700 | -0.46599700 |
| H | -1.46103500 | -5.10001100 | 0.81830100  |
| H | 0.98232900  | -5.86371800 | -0.12892000 |
| H | 2.95026700  | -4.96764600 | 1.04041800  |
| H | -8.10908800 | -1.19987900 | 1.00793400  |
| H | -9.08874100 | 1.35906100  | -0.38324800 |
| H | -8.14302200 | 3.81471400  | 1.18490000  |
| H | -7.39515700 | 5.29499800  | -1.41929100 |
| H | -5.38045200 | 6.07582100  | -0.18232100 |
| H | -3.43183900 | 6.07178900  | -0.08558800 |
| H | -1.46178200 | 5.21873200  | 1.14994700  |
| H | 0.98176800  | 6.03501500  | 0.25694300  |
| H | 2.94553300  | 5.07151700  | 1.37540800  |
| H | -5.84622100 | -2.47287300 | 0.98339500  |
| H | -5.12804900 | -1.13340900 | -1.71453800 |
| H | -5.84321200 | 0.05383900  | 1.05427000  |
| H | -5.12733100 | 1.41353600  | -1.63437400 |
| H | -5.84953800 | 2.58073700  | 1.14166900  |
| H | -5.16086200 | 3.96894400  | -1.53897400 |
| H | -3.63782900 | 3.88345700  | 1.14691100  |
| H | -7.31931100 | 0.13851000  | -1.66719100 |
| H | -7.32865300 | 2.68312000  | -1.57631500 |
| H | -7.33077900 | -2.40619600 | -1.73314800 |
| C | -0.48826200 | -0.14224100 | 3.68982300  |
| O | -1.09142500 | -1.25883400 | 3.06103000  |
| C | -0.48477800 | -2.39684700 | 3.64585500  |
| C | 1.00647000  | -2.04461400 | 3.77634200  |
| C | 1.00324600  | -0.49769400 | 3.82010300  |
| H | -0.68442000 | 0.73860900  | 3.07152100  |
| H | -0.93975100 | 0.01531100  | 4.68132500  |
| H | -0.92837700 | -2.58853400 | 4.63511800  |
| H | -0.68636000 | -3.25531100 | 2.99878700  |
| H | 1.45338700  | -2.49188300 | 4.66730500  |
| H | 1.56204200  | -2.40561000 | 2.90543000  |
| H | 1.43404300  | -0.10123700 | 4.74251900  |
| H | 1.57179800  | -0.08461900 | 2.98124800  |

Graphane-S5S

|   |             |             |             |
|---|-------------|-------------|-------------|
| C | -5.10117200 | 1.45569500  | -0.54238700 |
| C | -5.82677600 | 2.68853100  | 0.04752300  |
| C | -3.62935400 | 1.42641300  | -0.08011500 |
| C | -8.01970100 | 1.41849600  | 0.00814400  |
| C | -7.30616000 | 2.71504900  | -0.41264200 |
| C | -5.11654200 | 3.99393400  | -0.38524800 |
| C | -2.91717600 | 2.72284800  | -0.49350700 |
| C | -8.03752800 | 3.93721800  | 0.17607100  |
| C | -5.85343000 | 5.20737700  | 0.22183100  |
| C | -3.63687300 | 3.97249900  | 0.04902600  |
| C | -1.44839400 | 2.69685400  | -0.03567600 |
| C | -7.32454600 | 5.23858300  | -0.20895900 |
| H | -5.78599200 | 5.17398900  | 1.32564300  |
| C | -2.90481800 | 5.23771900  | -0.41729600 |
| C | -0.71178600 | 1.45060800  | -0.55554800 |
| C | -0.69885900 | 3.98143300  | -0.42662000 |
| H | -7.83551900 | 6.10112600  | 0.25776200  |
| C | -1.45340000 | 5.22800500  | 0.04435300  |
| H | -2.93560000 | 5.29069700  | -1.51463600 |
| C | 0.74825900  | 1.42040500  | -0.07135800 |
| C | 0.74502800  | 3.95000400  | 0.09767400  |
| H | -0.95835300 | 6.13172600  | -0.32323000 |
| C | 1.49587500  | 2.71570500  | -0.42902700 |
| C | 1.50845100  | 5.23732300  | -0.22591000 |
| C | 2.95381500  | 2.68254800  | 0.06285200  |
| C | 2.94937000  | 5.19199600  | 0.26576900  |
| H | 1.49402100  | 5.39712000  | -1.31538600 |
| C | 3.67566500  | 1.43860800  | -0.47579500 |
| C | 3.69153100  | 3.98134900  | -0.31553700 |
| H | 3.46084200  | 6.12685400  | 0.00527400  |
| C | 5.13251800  | 1.40543300  | 0.03169200  |
| C | 5.15678900  | 3.94591500  | 0.16471600  |
| C | 5.87904200  | 2.69408800  | -0.38914200 |
| C | 5.91497900  | 5.21597800  | -0.27783600 |
| C | 7.34195700  | 2.66079400  | 0.12075000  |
| H | 5.40770400  | 6.11733500  | 0.11581800  |
| C | 7.37067700  | 5.19144100  | 0.20265300  |
| C | 8.09468200  | 3.93770100  | -0.30128800 |
| C | 8.06824000  | 1.41666500  | -0.41946100 |
| H | 7.89821400  | 6.09817200  | -0.14756200 |
| C | 8.08035500  | -3.62060300 | -0.72765100 |
| C | 8.06336200  | -1.10213700 | -0.56179000 |
| C | 7.35090600  | -4.92022300 | -0.36863300 |
| C | 7.33189500  | -2.39633800 | -0.16543200 |
| C | 7.32719400  | 0.13157200  | -0.01066100 |
| C | 5.89590700  | -4.88500800 | -0.85063000 |
| H | 7.87569200  | -5.78381900 | -0.81802000 |
| C | 5.86958100  | -2.36636100 | -0.67719800 |
| C | 5.86752200  | 0.16372700  | -0.52594500 |



|   |             |             |             |
|---|-------------|-------------|-------------|
| C | 5.14154600  | -3.66991600 | -0.26908200 |
| H | 5.86713500  | -4.85134000 | -1.95617100 |
| C | 5.12739300  | -1.13069100 | -0.11418500 |
| C | 3.67754000  | -3.64486200 | -0.75370300 |
| C | 3.67140200  | -1.09938200 | -0.62432000 |
| C | 2.92674300  | -4.90877100 | -0.31423100 |
| C | 2.94392000  | -2.39384900 | -0.23365500 |
| C | 2.94019200  | 0.14390500  | -0.09209300 |
| C | 1.49148400  | -4.89299600 | -0.82358200 |
| H | 3.43801100  | -5.81230100 | -0.66861000 |
| C | 1.48695700  | -2.36376400 | -0.72972100 |
| C | 1.48708100  | 0.17615400  | -0.58902300 |
| C | 0.72781500  | -3.64930300 | -0.36183700 |
| H | 1.49014300  | -4.92513900 | -1.92434600 |
| C | 0.74055200  | -1.11690500 | -0.22547400 |
| C | -0.71073300 | -3.61137100 | -0.89905200 |
| C | -0.71633300 | -1.08378700 | -0.71770000 |
| C | -1.46978300 | -4.90499100 | -0.58904000 |
| C | -1.45767500 | -2.38190500 | -0.35673300 |
| C | -1.44821600 | 0.15586600  | -0.17901000 |
| C | -2.92104100 | -4.85179100 | -1.04685500 |
| H | -0.97680000 | -5.75749000 | -1.06612300 |
| C | -2.92578600 | -2.34741000 | -0.81358400 |
| C | -2.91291200 | 0.18641300  | -0.63890300 |
| C | -3.64690200 | -3.65173100 | -0.42451600 |
| H | -2.95155400 | -4.76549700 | -2.14212300 |
| C | -3.63240700 | -1.11144800 | -0.23729500 |
| C | -5.12854000 | -3.61721700 | -0.85063900 |
| C | -5.10492100 | -1.07864300 | -0.69761800 |
| C | -5.86637600 | -4.89314000 | -0.39052900 |
| C | -5.83337600 | -2.37200900 | -0.26042600 |
| C | -5.82359200 | 0.15824000  | -0.10917400 |
| C | -7.33896900 | -4.86921000 | -0.81676300 |
| H | -5.37124600 | -5.78967900 | -0.80947700 |
| C | -7.31377000 | -2.33927600 | -0.71679900 |
| C | -7.30049500 | 0.18829900  | -0.57253100 |
| C | -8.04712100 | -3.62138400 | -0.27658800 |
| H | -7.41250600 | -4.89641200 | -1.92085200 |
| C | -8.02293000 | -1.10053300 | -0.14246600 |
| H | 8.18781700  | 3.97657000  | -1.40305700 |
| H | 8.15262300  | 1.47336000  | -1.52076100 |
| H | 9.10042900  | -1.12327400 | -0.18027700 |
| H | 9.11281700  | -3.64543300 | -0.33396800 |
| H | -8.09845800 | -3.66843400 | 0.82760200  |
| H | -9.07372200 | -1.07536000 | -0.48355400 |
| H | -8.06303300 | 1.34828900  | 1.11103100  |
| H | -9.08335200 | 3.95922400  | -0.18053600 |
| H | 0.70177700  | -1.17954900 | 0.87898000  |
| H | 0.72447800  | 1.35326300  | 1.03285200  |
| H | -1.45175500 | 0.07867700  | 0.92413600  |

|   |             |             |             |
|---|-------------|-------------|-------------|
| H | 1.51684000  | 0.24308000  | -1.69297800 |
| H | -0.69465600 | -1.00702600 | -1.82121200 |
| H | -0.69370900 | 1.51532900  | -1.65955900 |
| H | 1.52146900  | -2.30635600 | -1.83424200 |
| H | 2.91782800  | -2.45183000 | 0.86877100  |
| H | 3.68182000  | -1.03667000 | -1.73226000 |
| H | 2.90685800  | 0.07768200  | 1.01022900  |
| H | 3.68475500  | 1.50505200  | -1.58358000 |
| H | 2.92678700  | 2.61432500  | 1.16434600  |
| H | 1.52429300  | 2.79117300  | -1.53260000 |
| H | 0.69523700  | 3.85853800  | 1.19789400  |
| H | -0.65274000 | 4.01366300  | -1.53013000 |
| H | -1.45494700 | 2.64070800  | 1.06965200  |
| H | 0.66318600  | -3.69022200 | 0.74129900  |
| H | -0.65581700 | -3.50936000 | -1.99799600 |
| H | -1.46659500 | -2.45389600 | 0.74651200  |
| H | -2.93208900 | -2.26823400 | -1.91488400 |
| H | -3.60015500 | -1.18754200 | 0.86891100  |
| H | -2.91328800 | 0.25623500  | -1.74071100 |
| H | -3.60283500 | 1.36056400  | 1.02741400  |
| H | -2.91876300 | 2.78064900  | -1.59583300 |
| H | 5.12294000  | 1.34540100  | 1.14595300  |
| H | 5.89265700  | 2.75298400  | -1.50290100 |
| H | 5.16768000  | 3.89976500  | 1.28020300  |
| H | 3.67792700  | 4.06317600  | -1.42089100 |
| H | 5.88443800  | 5.30722500  | -1.38001900 |
| H | 7.40371800  | 5.22763100  | 1.30845600  |
| H | 9.12758000  | 3.91425400  | 0.09129200  |
| H | 7.32883100  | 2.61129100  | 1.23638800  |
| H | 9.10539300  | 1.39066100  | -0.03850400 |
| H | 5.88513100  | 0.22772000  | -1.63959700 |
| H | 7.31181500  | 0.06863200  | 1.10445300  |
| H | 8.14812700  | -1.03444300 | -1.66244700 |
| H | 7.31757400  | -2.47238800 | 0.94867600  |
| H | 5.88460000  | -2.29906000 | -1.79047900 |
| H | 5.11612400  | -1.19724600 | 0.99968600  |
| H | 8.17498600  | -3.53559800 | -1.82671300 |
| H | 7.38220400  | -5.08058400 | 0.72609200  |
| H | 5.38457200  | -5.82298400 | -0.56188900 |
| H | 5.15018800  | -3.74976700 | 0.84437400  |
| H | 3.66708100  | -3.60161300 | -1.86124600 |
| H | -3.59216300 | -3.74531500 | 0.67917300  |
| H | -5.18037700 | -3.56192500 | -1.96452300 |
| H | -9.09394800 | -3.59793400 | -0.63002200 |
| H | -7.85085300 | -5.78005500 | -0.45455900 |
| H | -5.79520100 | -4.99193600 | 0.70914500  |
| H | -3.42526500 | -5.79235800 | -0.79236800 |
| H | -1.43469200 | -5.08765000 | 0.49732700  |
| H | 0.98297300  | -5.79885200 | -0.48093200 |
| H | 2.91921700  | -4.96205000 | 0.78408000  |

|   |             |             |             |
|---|-------------|-------------|-------------|
| H | -8.06454200 | -1.16311900 | 0.96096700  |
| H | -9.07004800 | 1.43752700  | -0.33480400 |
| H | -8.09232600 | 3.85185200  | 1.27776800  |
| H | -7.39418700 | 5.39766900  | -1.30213400 |
| H | -5.35500200 | 6.14640700  | -0.08524500 |
| H | -3.40527900 | 6.14054700  | -0.04584800 |
| H | -1.41745500 | 5.27154400  | 1.14428100  |
| H | 1.00778100  | 6.09882100  | 0.22570200  |
| H | 2.95386000  | 5.12690800  | 1.36295400  |
| H | -5.80581100 | -2.43939100 | 0.85274400  |
| H | -5.13154000 | -1.01181300 | -1.81125700 |
| H | -5.80087200 | 0.08978100  | 1.00425700  |
| H | -5.12640800 | 1.52462800  | -1.65597300 |
| H | -5.80242400 | 2.62008900  | 1.16057300  |
| H | -5.16315900 | 4.07340400  | -1.49788500 |
| H | -3.58890100 | 3.93086200  | 1.15574100  |
| H | -7.32452000 | 0.25502500  | -1.68730600 |
| H | -7.33092000 | 2.79167400  | -1.52656200 |
| H | -7.34113300 | -2.28212900 | -1.83182100 |
| C | 0.03635500  | -0.48166600 | 3.88473900  |
| C | -0.52142700 | -3.08888700 | 3.57624200  |
| C | 0.96428100  | -2.72296300 | 3.60463700  |
| C | 1.08842000  | -1.44469700 | 4.43297700  |
| H | 0.38035500  | -0.01177700 | 2.95737500  |
| H | -0.22921200 | 0.30313500  | 4.59573700  |
| H | -0.80907400 | -3.64768300 | 4.47042300  |
| H | -0.78558600 | -3.68240900 | 2.69601200  |
| H | 1.56357100  | -3.54405300 | 4.01092800  |
| H | 1.31330700  | -2.52704300 | 2.58357300  |
| H | 0.87567400  | -1.66179900 | 5.48587300  |
| H | 2.09110800  | -1.00959500 | 4.37011000  |
| S | -1.44941100 | -1.50199600 | 3.54042400  |

#### Graphane-U6C

|   |            |             |             |
|---|------------|-------------|-------------|
| C | 5.16401000 | -1.18097200 | -0.56694100 |
| C | 5.88718600 | -2.46476000 | -0.09420800 |
| C | 3.69161900 | -1.19214100 | -0.10568300 |
| C | 8.08416900 | -1.20207700 | -0.02545400 |
| C | 7.36526900 | -2.45320200 | -0.55941100 |
| C | 5.17248000 | -3.72350500 | -0.64233200 |
| C | 2.97659000 | -2.44270700 | -0.63783300 |
| C | 8.09476100 | -3.72555100 | -0.08599700 |
| C | 5.90675600 | -4.98872300 | -0.14856600 |
| C | 3.69291400 | -3.73693100 | -0.20727300 |
| C | 1.50647500 | -2.45289200 | -0.18438500 |
| C | 7.37677100 | -4.98508000 | -0.58416800 |
| H | 5.84160300 | -5.05526400 | 0.95378600  |
| C | 2.95794200 | -4.95541800 | -0.78076300 |
| C | 0.77435100 | -1.16321100 | -0.59119000 |
| C | 0.75649000 | -3.69626900 | -0.69037500 |

|   |             |             |             |
|---|-------------|-------------|-------------|
| H | 7.88631300  | -5.88749100 | -0.19811200 |
| C | 1.50585400  | -4.97972000 | -0.32203100 |
| H | 2.98914000  | -4.91360300 | -1.87855400 |
| C | -0.68898100 | -1.17302700 | -0.11547100 |
| C | -0.69059500 | -3.70549200 | -0.17481500 |
| H | 1.00936800  | -5.84925700 | -0.76291500 |
| C | -1.43294600 | -2.42842600 | -0.60110800 |
| C | -1.45243900 | -4.96014700 | -0.61014300 |
| C | -2.89801600 | -2.43498800 | -0.12984700 |
| C | -2.89887800 | -4.95066500 | -0.13316300 |
| H | -1.42776300 | -5.03107800 | -1.70897500 |
| C | -3.60977300 | -1.14808300 | -0.57148000 |
| C | -3.63025600 | -3.69572300 | -0.62714300 |
| H | -3.40852500 | -5.86164800 | -0.47090100 |
| C | -5.07520100 | -1.15671500 | -0.08721900 |
| C | -5.10474000 | -3.69801100 | -0.17420600 |
| C | -5.81499400 | -2.40147100 | -0.63270700 |
| C | -5.85488800 | -4.92363100 | -0.73902800 |
| C | -7.28776700 | -2.40870000 | -0.15103300 |
| H | -5.35631600 | -5.85653500 | -0.41377500 |
| C | -7.32026300 | -4.93663500 | -0.28831000 |
| C | -8.03273100 | -3.64227800 | -0.69727800 |
| C | -8.00150100 | -1.11995800 | -0.59482300 |
| H | -7.84119100 | -5.80847600 | -0.72601300 |
| C | -8.00294000 | 3.92568200  | -0.43561400 |
| C | -7.99149400 | 1.40223200  | -0.50759400 |
| C | -7.28102300 | 5.18308700  | 0.06231200  |
| C | -7.26807100 | 2.65156200  | 0.02442700  |
| C | -7.26821000 | 0.12114000  | -0.05664800 |
| C | -5.81521300 | 5.18994200  | -0.38715400 |
| H | -7.79467400 | 6.08713000  | -0.31442100 |
| C | -5.79487900 | 2.66628100  | -0.45589700 |
| C | -5.79844300 | 0.13234800  | -0.54322100 |
| C | -5.07529400 | 3.92236800  | 0.09212100  |
| H | -5.76069400 | 5.26262200  | -1.48978600 |
| C | -5.06554300 | 1.38068800  | 0.00206900  |
| C | -3.60024100 | 3.94045200  | -0.35812700 |
| C | -3.59975600 | 1.39422100  | -0.48037300 |
| C | -2.86021300 | 5.15291700  | 0.22218800  |
| C | -2.87892900 | 2.64198900  | 0.05093000  |
| C | -2.88016100 | 0.10361800  | -0.05779000 |
| C | -1.41177800 | 5.18380600  | -0.24814500 |
| H | -3.36126600 | 6.08834600  | -0.05606000 |
| C | -1.41336400 | 2.65722700  | -0.41816100 |
| C | -1.41879500 | 0.11391800  | -0.53068500 |
| C | -0.66067500 | 3.89505900  | 0.09764400  |
| H | -1.38127600 | 5.33313500  | -1.33880500 |
| C | -0.67968700 | 1.36385700  | -0.02725900 |
| C | 0.78605900  | 3.91013900  | -0.41933400 |
| C | 0.78492800  | 1.37636700  | -0.49921500 |

|   |             |             |             |
|---|-------------|-------------|-------------|
| C | 1.54669700  | 5.16089100  | 0.02990600  |
| C | 1.52699000  | 2.62895800  | -0.00289300 |
| C | 1.51232100  | 0.08716700  | -0.08714400 |
| C | 2.99718200  | 5.15489900  | -0.43469400 |
| H | 1.05565600  | 6.06057200  | -0.35258000 |
| C | 2.99634300  | 2.63824700  | -0.45982600 |
| C | 2.97862700  | 0.09765100  | -0.54268400 |
| C | 3.72394000  | 3.89536200  | 0.05425500  |
| H | 3.02540800  | 5.18646000  | -1.53289800 |
| C | 3.70227200  | 1.34827600  | -0.01743600 |
| C | 5.20196300  | 3.89924200  | -0.38615700 |
| C | 5.17379300  | 1.35764300  | -0.48125500 |
| C | 5.94758500  | 5.12326400  | 0.18790300  |
| C | 5.90761100  | 2.60121300  | 0.07517800  |
| C | 5.89086400  | 0.06838900  | -0.01589500 |
| C | 7.41661200  | 5.13661300  | -0.25072700 |
| H | 5.45232700  | 6.05711000  | -0.13978700 |
| C | 7.38496400  | 2.60884500  | -0.39233000 |
| C | 7.36585500  | 0.07821900  | -0.48665200 |
| C | 8.12527000  | 3.84151000  | 0.16225600  |
| H | 7.48155400  | 5.26898100  | -1.34778400 |
| C | 8.09429900  | 1.31968600  | 0.05731200  |
| H | -8.10280600 | -3.58563500 | -1.79995500 |
| H | -8.06123300 | -1.07820500 | -1.69833800 |
| H | -9.03691200 | 1.39062200  | -0.14933200 |
| H | -9.04407900 | 3.91577300  | -0.06485000 |
| H | 8.18603200  | 3.78316100  | 1.26537700  |
| H | 9.14256300  | 1.32456500  | -0.29282000 |
| H | 8.13413600  | -1.23370100 | 1.07886600  |
| H | 9.13932000  | -3.71821100 | -0.44713600 |
| H | -0.66841900 | 1.31090300  | 1.07691600  |
| H | -0.67631600 | -1.20424100 | 0.98871800  |
| H | 1.50968500  | 0.04494200  | 1.01775600  |
| H | -1.42854100 | 0.15386400  | -1.63689400 |
| H | 0.77736300  | 1.41541100  | -1.60465400 |
| H | 0.76644600  | -1.12130000 | -1.69685300 |
| H | -1.42617900 | 2.71468100  | -1.52327200 |
| H | -2.87011100 | 2.58933300  | 1.15408900  |
| H | -3.58876200 | 1.44217600  | -1.58924200 |
| H | -2.86302900 | 0.06119100  | 1.04478500  |
| H | -3.60034300 | -1.11600300 | -1.68108200 |
| H | -2.88410300 | -2.45838900 | 0.97355500  |
| H | -1.44619500 | -2.40528700 | -1.70789900 |
| H | -0.64752700 | -3.70292400 | 0.92893700  |
| H | 0.71887000  | -3.63425800 | -1.79318700 |
| H | 1.50633600  | -2.49531800 | 0.92097600  |
| H | -0.61835100 | 3.81737600  | 1.19947500  |
| H | 0.74419600  | 3.92205500  | -1.52342300 |
| H | 1.53185200  | 2.59506800  | 1.10384600  |
| H | 2.99815800  | 2.67092100  | -1.56304900 |

|   |             |             |             |
|---|-------------|-------------|-------------|
| H | 3.67721700  | 1.31154200  | 1.09199700  |
| H | 2.98196000  | 0.13609500  | -1.64564500 |
| H | 3.66436400  | -1.23339700 | 1.00382500  |
| H | 2.98325300  | -2.39967600 | -1.74079600 |
| H | -5.08378500 | -1.19604200 | 1.02801000  |
| H | -5.80626000 | -2.36394600 | -1.74738100 |
| H | -5.13754400 | -3.74749700 | 0.94058000  |
| H | -3.59607900 | -3.68756900 | -1.73523200 |
| H | -5.80172800 | -4.92020400 | -1.84412100 |
| H | -7.37626600 | -5.06754600 | 0.80935600  |
| H | -9.07356700 | -3.65005200 | -0.32565300 |
| H | -7.29697400 | -2.45647500 | 0.96473400  |
| H | -9.04678400 | -1.12503700 | -0.23603400 |
| H | -5.79317500 | 0.17148000  | -1.65803600 |
| H | -7.27531000 | 0.08253100  | 1.05971500  |
| H | -8.05094300 | 1.43742800  | -1.61135200 |
| H | -7.27794000 | 2.62218700  | 1.14085500  |
| H | -5.78531400 | 2.70628600  | -1.57046700 |
| H | -5.07556400 | 1.34215600  | 1.11735000  |
| H | -8.07234000 | 3.94596500  | -1.53959800 |
| H | -7.33735200 | 5.23824300  | 1.16639000  |
| H | -5.31005600 | 6.09422900  | 0.00241800  |
| H | -5.10961200 | 3.89472400  | 1.20770800  |
| H | -3.56388200 | 4.00798500  | -1.46397400 |
| H | 3.68004400  | 3.87692900  | 1.16191500  |
| H | 5.24419700  | 3.95159600  | -1.50065900 |
| H | 9.16923400  | 3.84968400  | -0.20057400 |
| H | 7.93414200  | 6.00776100  | 0.19232400  |
| H | 5.88522700  | 5.11753500  | 1.29244900  |
| H | 3.50339100  | 6.06199300  | -0.08196000 |
| H | 1.51257700  | 5.22377700  | 1.12898800  |
| H | -0.91169400 | 6.04642500  | 0.20218900  |
| H | -2.88234600 | 5.09938500  | 1.31982000  |
| H | 8.14491800  | 1.27808400  | 1.16127900  |
| H | 9.13267600  | -1.19206300 | -0.37475300 |
| H | 8.15389400  | -3.74025800 | 1.01864600  |
| H | 7.44336100  | -5.04587400 | -1.68741700 |
| H | 5.40488200  | -5.89486200 | -0.53815700 |
| H | 3.45625800  | -5.88796300 | -0.48807800 |
| H | 1.46702000  | -5.11289100 | 0.77113400  |
| H | -0.95859000 | -5.85747100 | -0.22537300 |
| H | -2.91627100 | -4.97021100 | 0.96617900  |
| H | 5.88824700  | 2.56056500  | 1.18956500  |
| H | 5.19764400  | 1.39771600  | -1.59641700 |
| H | 5.87376800  | 0.03093400  | 1.09880900  |
| H | 5.18937200  | -1.14650200 | -1.68228600 |
| H | 5.86623200  | -2.49858800 | 1.02034500  |
| H | 5.21799700  | -3.70228900 | -1.75775600 |
| H | 3.64486200  | -3.79223300 | 0.89924000  |
| H | 7.38474600  | 0.11483800  | -1.60297600 |

|   |             |             |             |
|---|-------------|-------------|-------------|
| H | 7.38651900  | -2.42884600 | -1.67581900 |
| H | 7.40471100  | 2.65764800  | -1.50796100 |
| C | -1.24726100 | -2.49440300 | 3.54274100  |
| C | 0.14531600  | -2.44097300 | 3.51967600  |
| C | 0.79547600  | -1.20855900 | 3.53498000  |
| C | 0.05334500  | -0.02933600 | 3.57342500  |
| C | -1.33909700 | -0.08255500 | 3.59645600  |
| H | 1.88114800  | -1.16641100 | 3.50877000  |
| H | -1.75477000 | -3.45499800 | 3.52359000  |
| H | 0.72415100  | -3.35987900 | 3.48196300  |
| H | 0.56080100  | 0.93174400  | 3.57640000  |
| H | -1.91769600 | 0.83692100  | 3.61808600  |
| C | -1.98923000 | -1.31511500 | 3.58117500  |
| H | -3.07476600 | -1.35672500 | 3.59214700  |

#### Graphane-U6O

|   |             |             |             |
|---|-------------|-------------|-------------|
| C | 5.15588400  | -1.16928800 | -0.57346000 |
| C | 5.87349800  | -2.45492100 | -0.09750000 |
| C | 3.67839700  | -1.18321600 | -0.12902900 |
| C | 8.06845300  | -1.19110400 | 0.00787200  |
| C | 7.35804500  | -2.44036300 | -0.54153600 |
| C | 5.16751200  | -3.71070900 | -0.66338200 |
| C | 2.96985000  | -2.43077200 | -0.67638100 |
| C | 8.08117200  | -3.71463300 | -0.06362700 |
| C | 5.89505500  | -4.97862200 | -0.16640100 |
| C | 3.68181400  | -3.72866100 | -0.25024400 |
| C | 1.49543800  | -2.44649300 | -0.23745900 |
| C | 7.37154300  | -4.97182700 | -0.57946400 |
| H | 5.81322700  | -5.05201100 | 0.93441000  |
| C | 2.95553600  | -4.94005800 | -0.84946200 |
| C | 0.76464100  | -1.15357300 | -0.63650100 |
| C | 0.74959000  | -3.68444900 | -0.76325300 |
| H | 7.87567500  | -5.87605900 | -0.19059800 |
| C | 1.49834600  | -4.97227300 | -0.40818500 |
| H | 3.00035900  | -4.88294500 | -1.94607100 |
| C | -0.69751300 | -1.16738300 | -0.15949300 |
| C | -0.69656400 | -3.70243500 | -0.24636700 |
| H | 1.00739200  | -5.83522200 | -0.86780700 |
| C | -1.44405400 | -2.42020100 | -0.64794400 |
| C | -1.46195800 | -4.94919500 | -0.69657600 |
| C | -2.90189300 | -2.43221600 | -0.15436400 |
| C | -2.89901300 | -4.95073900 | -0.19184800 |
| H | -1.45737900 | -4.99635100 | -1.79690500 |
| C | -3.62272400 | -1.14408300 | -0.57773500 |
| C | -3.64201200 | -3.68916800 | -0.65032700 |
| H | -3.41412700 | -5.85658500 | -0.53492900 |
| C | -5.07958700 | -1.15648200 | -0.06922400 |
| C | -5.10593000 | -3.69776300 | -0.16497700 |
| C | -5.82771600 | -2.40089600 | -0.60422100 |
| C | -5.86605300 | -4.92304500 | -0.71696200 |

|   |             |             |             |
|---|-------------|-------------|-------------|
| C | -7.29033700 | -2.41183200 | -0.09276900 |
| H | -5.35951400 | -5.85616000 | -0.40522800 |
| C | -7.32123100 | -4.93956800 | -0.23438600 |
| C | -8.04451700 | -3.64575800 | -0.62552700 |
| C | -8.01523400 | -1.12395600 | -0.52070100 |
| H | -7.85007700 | -5.81159800 | -0.66195800 |
| C | -8.02169000 | 3.92078100  | -0.37226900 |
| C | -8.00753300 | 1.39758800  | -0.43592200 |
| C | -7.29262800 | 5.18141400  | 0.10659400  |
| C | -7.27613500 | 2.64952700  | 0.07865600  |
| C | -7.27338700 | 0.11835800  | 0.00278300  |
| C | -5.83568300 | 5.18864400  | -0.37086300 |
| H | -7.81492500 | 6.08304300  | -0.26389500 |
| C | -5.81202600 | 2.66475100  | -0.42873900 |
| C | -5.81292800 | 0.13174500  | -0.51115600 |
| C | -5.08489900 | 3.92447000  | 0.10044100  |
| H | -5.80233500 | 5.25594900  | -1.47466700 |
| C | -5.07280900 | 1.38170500  | 0.02075700  |
| C | -3.61823200 | 3.94243100  | -0.37629200 |
| C | -3.61478700 | 1.39620300  | -0.48410100 |
| C | -2.87159000 | 5.16158100  | 0.18127600  |
| C | -2.88818600 | 2.64785700  | 0.03021500  |
| C | -2.88702300 | 0.10690700  | -0.07070700 |
| C | -1.42881300 | 5.18932300  | -0.30646900 |
| H | -3.37739200 | 6.09330200  | -0.10072400 |
| C | -1.42848000 | 2.66327800  | -0.45736100 |
| C | -1.43206600 | 0.12067000  | -0.56315100 |
| C | -0.67389400 | 3.90489800  | 0.04622800  |
| H | -1.41030700 | 5.32626700  | -1.39899100 |
| C | -0.69026000 | 1.37241100  | -0.06766100 |
| C | 0.77247800  | 3.91767300  | -0.47174500 |
| C | 0.77301100  | 1.38496900  | -0.54217500 |
| C | 1.53060100  | 5.17240800  | -0.02876000 |
| C | 1.51243100  | 2.63895900  | -0.04551500 |
| C | 1.49889000  | 0.09621600  | -0.12563500 |
| C | 2.98524900  | 5.16245300  | -0.48001600 |
| H | 1.04260400  | 6.06829200  | -0.42392500 |
| C | 2.98544800  | 2.64709000  | -0.48962700 |
| C | 2.96910000  | 0.10775200  | -0.56812500 |
| C | 3.70648000  | 3.90685200  | 0.02687900  |
| H | 3.02420100  | 5.18441100  | -1.57810600 |
| C | 3.68691600  | 1.35865200  | -0.03588600 |
| C | 5.19052300  | 3.90944800  | -0.39246100 |
| C | 5.16356600  | 1.36816200  | -0.48286000 |
| C | 5.92737600  | 5.13494000  | 0.18982500  |
| C | 5.88974900  | 2.61250700  | 0.08166600  |
| C | 5.87514900  | 0.07877700  | -0.00971400 |
| C | 7.40289600  | 5.14769500  | -0.22643900 |
| H | 5.43681400  | 6.06783700  | -0.14754900 |
| C | 7.37355000  | 2.61992900  | -0.36484400 |



|   |             |             |             |
|---|-------------|-------------|-------------|
| C | 7.35635400  | 0.09004500  | -0.46038700 |
| C | 8.10540900  | 3.85330900  | 0.19923100  |
| H | 7.48449100  | 5.27837400  | -1.32259500 |
| C | 8.07650700  | 1.33104200  | 0.09544200  |
| H | -8.13807600 | -3.58708600 | -1.72633300 |
| H | -8.09791300 | -1.08171600 | -1.62270300 |
| H | -9.04549900 | 1.38486800  | -0.05661500 |
| H | -9.05551400 | 3.91062000  | 0.01838600  |
| H | 8.14942600  | 3.79653200  | 1.30321600  |
| H | 9.12997300  | 1.33626800  | -0.23869100 |
| H | 8.10158500  | -1.22635200 | 1.11267800  |
| H | 9.13109300  | -3.70483300 | -0.40876500 |
| H | -0.67085900 | 1.32324300  | 1.03572400  |
| H | -0.67839800 | -1.20534100 | 0.94453900  |
| H | 1.48511500  | 0.05694600  | 0.98024700  |
| H | -1.45590100 | 0.16149500  | -1.66902600 |
| H | 0.76726300  | 1.42137600  | -1.64760900 |
| H | 0.75777700  | -1.10532500 | -1.74170600 |
| H | -1.45368300 | 2.71631800  | -1.56241800 |
| H | -2.86432000 | 2.60189300  | 1.13351100  |
| H | -3.62103800 | 1.44052900  | -1.59316700 |
| H | -2.85720000 | 0.05879300  | 1.03152900  |
| H | -3.63108900 | -1.10702300 | -1.68721000 |
| H | -2.87321800 | -2.45845900 | 0.94884400  |
| H | -1.47300800 | -2.38479600 | -1.75403000 |
| H | -0.64661300 | -3.71841200 | 0.85619600  |
| H | 0.71497800  | -3.60695100 | -1.86507200 |
| H | 1.48367900  | -2.50524300 | 0.86806600  |
| H | -0.62853100 | 3.83583200  | 1.14852400  |
| H | 0.73192200  | 3.92231900  | -1.57589000 |
| H | 1.50866700  | 2.60851700  | 1.06131300  |
| H | 2.99821600  | 2.67564300  | -1.59287000 |
| H | 3.64879300  | 1.32355500  | 1.07327500  |
| H | 2.98118100  | 0.14808000  | -1.67091100 |
| H | 3.63960800  | -1.23022000 | 0.98008000  |
| H | 2.98655400  | -2.37872200 | -1.77880200 |
| H | -5.06847900 | -1.19768400 | 1.04640500  |
| H | -5.84170500 | -2.35954200 | -1.71869300 |
| H | -5.11425900 | -3.75027600 | 0.95021300  |
| H | -3.63238600 | -3.66616900 | -1.75869400 |
| H | -5.83705800 | -4.91623000 | -1.82292000 |
| H | -7.35291000 | -5.07211600 | 0.86409800  |
| H | -9.07713100 | -3.65609700 | -0.23174700 |
| H | -7.27656700 | -2.46091600 | 1.02295100  |
| H | -9.05277000 | -1.13109700 | -0.14011700 |
| H | -5.82845200 | 0.17115500  | -1.62585900 |
| H | -7.25921700 | 0.08050400  | 1.11916000  |
| H | -8.08920600 | 1.43030200  | -1.53833800 |
| H | -7.26535300 | 2.62379300  | 1.19516600  |
| H | -5.82306200 | 2.70014900  | -1.54347200 |

|   |             |             |             |
|---|-------------|-------------|-------------|
| H | -5.06550000 | 1.34461100  | 1.13622000  |
| H | -8.11217200 | 3.93644500  | -1.47480100 |
| H | -7.32791200 | 5.24094700  | 1.21133100  |
| H | -5.32499400 | 6.09568200  | 0.00468200  |
| H | -5.09912900 | 3.90175900  | 1.21661600  |
| H | -3.60140500 | 4.00106800  | -1.48308900 |
| H | 3.64696000  | 3.89516600  | 1.13393400  |
| H | 5.24873700  | 3.95943200  | -1.50633900 |
| H | 9.15472800  | 3.86109200  | -0.14776500 |
| H | 7.91356300  | 6.01959500  | 0.22303400  |
| H | 5.84835200  | 5.13184700  | 1.29332100  |
| H | 3.48811100  | 6.07253200  | -0.13020400 |
| H | 1.48728000  | 5.24599100  | 1.06934000  |
| H | -0.92513900 | 6.05753500  | 0.12880400  |
| H | -2.87981100 | 5.12011900  | 1.27962000  |
| H | 8.11032600  | 1.28901600  | 1.19999800  |
| H | 9.12216100  | -1.17951400 | -0.32534500 |
| H | 8.12344600  | -3.73511100 | 1.04168300  |
| H | 7.45501900  | -5.02661700 | -1.68188900 |
| H | 5.39947800  | -5.88249000 | -0.56915500 |
| H | 3.45134400  | -5.87603000 | -0.56357400 |
| H | 1.44768300  | -5.12241500 | 0.68227700  |
| H | -0.96039100 | -5.85374700 | -0.33997000 |
| H | -2.89497500 | -4.98973000 | 0.90721300  |
| H | 5.85457900  | 2.57394500  | 1.19572000  |
| H | 5.20027500  | 1.40823700  | -1.59772400 |
| H | 5.84294100  | 0.03922600  | 1.10453800  |
| H | 5.19410600  | -1.13058100 | -1.68834300 |
| H | 5.83666500  | -2.49508300 | 1.01639700  |
| H | 5.22942100  | -3.68268100 | -1.77788400 |
| H | 3.61745100  | -3.79671300 | 0.85477700  |
| H | 7.39040900  | 0.12875800  | -1.57632300 |
| H | 7.39517300  | -2.41103000 | -1.65744200 |
| H | 7.40914300  | 2.66799900  | -1.48013900 |
| C | -1.14984500 | -2.43004700 | 3.36616000  |
| C | 0.17244300  | -2.51117600 | 3.49322700  |
| C | 1.05025500  | -1.29649800 | 3.64635400  |
| C | 0.19069000  | -0.06053200 | 3.58619900  |
| C | -1.13252600 | -0.11213200 | 3.45402400  |
| H | 1.60651900  | -1.33656800 | 4.59398000  |
| H | -1.80633700 | -3.28578900 | 3.25550500  |
| H | 0.62294800  | -3.49883800 | 3.48458500  |
| H | 0.65568100  | 0.91806000  | 3.65460100  |
| H | -1.77565000 | 0.75954600  | 3.40925100  |
| O | -1.86625200 | -1.26332500 | 3.34617100  |
| H | 1.81724000  | -1.27184800 | 2.85640700  |

Graphane-U6S

|   |            |             |             |
|---|------------|-------------|-------------|
| C | 5.19083000 | -1.16496000 | -0.60919700 |
| C | 5.90152900 | -2.45603700 | -0.13770600 |

|   |             |             |             |
|---|-------------|-------------|-------------|
| C | 3.71065200  | -1.17700800 | -0.17428100 |
| C | 8.10023300  | -1.20019900 | -0.01375300 |
| C | 7.38828600  | -2.44353800 | -0.57445900 |
| C | 5.19424200  | -3.70590000 | -0.71497700 |
| C | 3.00117200  | -2.41851700 | -0.73379300 |
| C | 8.10491400  | -3.72319100 | -0.10123600 |
| C | 5.91497700  | -4.97919700 | -0.22198100 |
| C | 3.70612200  | -3.72131600 | -0.31072900 |
| C | 1.52382500  | -2.43150200 | -0.30460000 |
| C | 7.39345100  | -4.97479700 | -0.62795200 |
| H | 5.82764100  | -5.05910400 | 0.87790700  |
| C | 2.97946400  | -4.92718800 | -0.92042300 |
| C | 0.79911900  | -1.13416100 | -0.69927100 |
| C | 0.77769300  | -3.66410200 | -0.84235300 |
| H | 7.89273900  | -5.88309000 | -0.24223400 |
| C | 1.51932700  | -4.95638600 | -0.48890500 |
| H | 3.03135100  | -4.86478000 | -2.01640200 |
| C | -0.66703800 | -1.14653700 | -0.23315200 |
| C | -0.67347200 | -3.68020000 | -0.33982500 |
| H | 1.02840300  | -5.81520000 | -0.95600600 |
| C | -1.41299600 | -2.39279600 | -0.73874400 |
| C | -1.43843300 | -4.92099300 | -0.80717800 |
| C | -2.87432800 | -2.40461400 | -0.25687700 |
| C | -2.88029900 | -4.92238800 | -0.31657100 |
| H | -1.42306900 | -4.95892300 | -1.90776400 |
| C | -3.58790600 | -1.10996400 | -0.67307500 |
| C | -3.61532100 | -3.65422000 | -0.76977900 |
| H | -3.39455600 | -5.82349700 | -0.67316100 |
| C | -5.04790200 | -1.12177100 | -0.17410300 |
| C | -5.08215500 | -3.66202300 | -0.29348700 |
| C | -5.79698500 | -2.35875300 | -0.72490800 |
| C | -5.84326900 | -4.87977800 | -0.86055400 |
| C | -7.26241900 | -2.36942100 | -0.22156000 |
| H | -5.34149400 | -5.81729900 | -0.55448100 |
| C | -7.30094000 | -4.89571800 | -0.38549800 |
| C | -8.01791000 | -3.59612500 | -0.76904400 |
| C | -7.98085100 | -1.07546700 | -0.64207100 |
| H | -7.83049100 | -5.76228600 | -0.82305700 |
| C | -7.97138000 | 3.96782600  | -0.44901500 |
| C | -7.96510400 | 1.44522100  | -0.53549300 |
| C | -7.24088900 | 5.22160800  | 0.04543900  |
| C | -7.23244300 | 2.69003100  | -0.00568500 |
| C | -7.23759500 | 0.15974900  | -0.10392200 |
| C | -5.78118100 | 5.22834700  | -0.42361700 |
| H | -7.75811800 | 6.12831500  | -0.31964100 |
| C | -5.76548300 | 2.70505700  | -0.50480700 |
| C | -5.77428100 | 0.17259200  | -0.60968600 |
| C | -5.03744100 | 3.95737900  | 0.04056400  |
| H | -5.74129600 | 5.30540700  | -1.52654000 |
| C | -5.03310500 | 1.41550600  | -0.06304000 |

|   |             |             |             |
|---|-------------|-------------|-------------|
| C | -3.56756600 | 3.97516200  | -0.42608600 |
| C | -3.57226200 | 1.42978100  | -0.55945300 |
| C | -2.82058800 | 5.18568900  | 0.14973200  |
| C | -2.84490000 | 2.67392400  | -0.02804600 |
| C | -2.85137700 | 0.13496300  | -0.15206300 |
| C | -1.37424700 | 5.21338600  | -0.32727700 |
| H | -3.32097600 | 6.12219600  | -0.12596900 |
| C | -1.38160000 | 2.68882400  | -0.50457800 |
| C | -1.39323600 | 0.14702900  | -0.63380100 |
| C | -0.62629100 | 3.92261500  | 0.01683500  |
| H | -1.34743200 | 5.36187300  | -1.41812000 |
| C | -0.65089900 | 1.39164900  | -0.12168100 |
| C | 0.82329800  | 3.93574400  | -0.49185400 |
| C | 0.81615100  | 1.40353500  | -0.58448400 |
| C | 1.58289700  | 5.18386000  | -0.03307400 |
| C | 1.55664500  | 2.65096800  | -0.07301600 |
| C | 1.53528500  | 0.10874300  | -0.17506800 |
| C | 3.03980900  | 5.17338800  | -0.47682400 |
| H | 1.09973900  | 6.08483200  | -0.42249400 |
| C | 3.03213300  | 2.65806800  | -0.50862100 |
| C | 3.00819600  | 0.11918500  | -0.60840100 |
| C | 3.75441600  | 3.91108900  | 0.02253200  |
| H | 3.08461600  | 5.20524200  | -1.57444000 |
| C | 3.72677700  | 1.36364300  | -0.06193600 |
| C | 5.24043400  | 3.91237200  | -0.38950000 |
| C | 5.20601200  | 1.37189100  | -0.50002000 |
| C | 5.97831800  | 5.13090200  | 0.20585300  |
| C | 5.93325400  | 2.60953200  | 0.07775200  |
| C | 5.91102700  | 0.07678100  | -0.03280000 |
| C | 7.45571100  | 5.14227100  | -0.20367100 |
| H | 5.49221600  | 6.06799400  | -0.12645300 |
| C | 7.41913900  | 2.61571400  | -0.36183600 |
| C | 7.39444600  | 0.08651100  | -0.47627700 |
| C | 8.15226500  | 3.84241200  | 0.21500900  |
| H | 7.54269600  | 5.28136300  | -1.29839300 |
| C | 8.11596700  | 1.32115100  | 0.09176700  |
| H | -8.10549600 | -3.52749000 | -1.86972400 |
| H | -8.05756900 | -1.02340900 | -1.74404400 |
| H | -9.00516300 | 1.43257600  | -0.16200500 |
| H | -9.00732600 | 3.95743100  | -0.06402500 |
| H | 8.19136100  | 3.77703400  | 1.31869200  |
| H | 9.17085900  | 1.32556400  | -0.23798700 |
| H | 8.12892500  | -1.24295200 | 1.09089400  |
| H | 9.15639300  | -3.71481100 | -0.44181200 |
| H | -0.64215800 | 1.33155500  | 0.98126100  |
| H | -0.66093300 | -1.19321400 | 0.87144200  |
| H | 1.51698600  | 0.05785700  | 0.93039600  |
| H | -1.40758700 | 0.19682600  | -1.73953700 |
| H | 0.81872900  | 1.44937400  | -1.68956600 |
| H | 0.80013300  | -1.07803100 | -1.80412900 |

|   |             |             |             |
|---|-------------|-------------|-------------|
| H | -1.39803800 | 2.75277900  | -1.60922800 |
| H | -2.82923600 | 2.61647500  | 1.07494800  |
| H | -3.57153700 | 1.48487800  | -1.66809700 |
| H | -2.82824500 | 0.08052200  | 0.95015800  |
| H | -3.58948400 | -1.06362100 | -1.78241900 |
| H | -2.85288500 | -2.44358900 | 0.84627700  |
| H | -1.43168700 | -2.34879800 | -1.84479900 |
| H | -0.63624200 | -3.70397800 | 0.76320800  |
| H | 0.75335600  | -3.58020800 | -1.94396000 |
| H | 1.50654600  | -2.49462600 | 0.80079400  |
| H | -0.58850700 | 3.84170300  | 1.11876800  |
| H | 0.78951100  | 3.95047700  | -1.59612300 |
| H | 1.54689500  | 2.61204000  | 1.03373900  |
| H | 3.05102500  | 2.69596700  | -1.61147200 |
| H | 3.68191500  | 1.31947400  | 1.04684900  |
| H | 3.02735100  | 0.16789500  | -1.71068300 |
| H | 3.66479600  | -1.23130500 | 0.93441800  |
| H | 3.02513000  | -2.35983000 | -1.83568300 |
| H | -5.04345500 | -1.17272300 | 0.94141200  |
| H | -5.80455000 | -2.30713000 | -1.83896600 |
| H | -5.09693100 | -3.72412900 | 0.82132500  |
| H | -3.59834200 | -3.62193200 | -1.87786200 |
| H | -5.80851200 | -4.86303700 | -1.96618700 |
| H | -7.33841300 | -5.03739700 | 0.71170200  |
| H | -9.05252200 | -3.60643700 | -0.38057800 |
| H | -7.25467300 | -2.42825400 | 0.89380000  |
| H | -9.02029300 | -1.08245000 | -0.26678300 |
| H | -5.78333500 | 0.22131900  | -1.72403400 |
| H | -7.22950000 | 0.11214400  | 1.01219400  |
| H | -8.04039400 | 1.48786500  | -1.63798400 |
| H | -7.22783700 | 2.65403400  | 1.11062500  |
| H | -5.77004500 | 2.75091600  | -1.61915400 |
| H | -5.03180200 | 1.36806100  | 1.05225500  |
| H | -8.05576100 | 3.99382300  | -1.55180200 |
| H | -7.28221900 | 5.27100400  | 1.15048600  |
| H | -5.26972000 | 6.13020400  | -0.03689900 |
| H | -5.05904600 | 3.92411200  | 1.15642600  |
| H | -3.54283500 | 4.04549400  | -1.53204100 |
| H | 3.68929600  | 3.88981300  | 1.12913700  |
| H | 5.30423700  | 3.97099200  | -1.50268800 |
| H | 9.20312900  | 3.84962700  | -0.12739400 |
| H | 7.96705800  | 6.00906000  | 0.25488400  |
| H | 5.89422400  | 5.11955500  | 1.30890600  |
| H | 3.54361800  | 6.07863300  | -0.11608700 |
| H | 1.53397600  | 5.24742300  | 1.06541600  |
| H | -0.87059000 | 6.07501900  | 0.12085100  |
| H | -2.83697400 | 5.13262700  | 1.24749200  |
| H | 8.14519800  | 1.27090800  | 1.19609800  |
| H | 9.15536900  | -1.18979600 | -0.34263900 |
| H | 8.14248800  | -3.75065500 | 1.00407100  |

|   |             |             |             |
|---|-------------|-------------|-------------|
| H | 7.48204000  | -5.02330400 | -1.73030200 |
| H | 5.41849600  | -5.87901500 | -0.63271400 |
| H | 3.47023900  | -5.86623200 | -0.63606400 |
| H | 1.46102900  | -5.11275500 | 0.60047700  |
| H | -0.94332000 | -5.83020600 | -0.45331400 |
| H | -2.88705200 | -4.97169900 | 0.78207800  |
| H | 5.89281300  | 2.56250400  | 1.19126900  |
| H | 5.24918000  | 1.42034600  | -1.61439200 |
| H | 5.87346800  | 0.02931500  | 1.08091300  |
| H | 5.23601800  | -1.11882900 | -1.72360500 |
| H | 5.85928800  | -2.50310900 | 0.97566600  |
| H | 5.26250000  | -3.67127500 | -1.82900000 |
| H | 3.63492700  | -3.79504400 | 0.79368900  |
| H | 7.43398800  | 0.13307300  | -1.59175200 |
| H | 7.43090900  | -2.40723900 | -1.68999200 |
| H | 7.46004800  | 2.67228300  | -1.47657200 |
| C | -1.12797000 | -2.61686300 | 3.41876700  |
| C | 0.20133100  | -2.53998900 | 3.35981300  |
| C | 1.01501100  | -1.29836900 | 3.61713600  |
| C | 0.22531900  | -0.02690700 | 3.44619200  |
| C | -1.10241400 | 0.07046100  | 3.50953000  |
| H | 1.44221000  | -1.33769000 | 4.63207300  |
| H | -1.64985400 | -3.55170300 | 3.23586000  |
| H | 0.74946400  | -3.44695900 | 3.11133100  |
| H | 0.78993000  | 0.88512100  | 3.25994600  |
| H | -1.60608200 | 1.02552500  | 3.39019000  |
| H | 1.88057100  | -1.28371300 | 2.94049300  |
| S | -2.22079200 | -1.27172900 | 3.73580900  |

#### Graphane-U6N

|   |             |             |             |
|---|-------------|-------------|-------------|
| C | 5.16233100  | -1.18039500 | -0.56717000 |
| C | 5.88582300  | -2.46423600 | -0.09505600 |
| C | 3.69002400  | -1.19192000 | -0.10609500 |
| C | 8.08254900  | -1.20109700 | -0.02660300 |
| C | 7.36371100  | -2.45210900 | -0.56088200 |
| C | 5.17110400  | -3.72292800 | -0.64335300 |
| C | 2.97495500  | -2.44275400 | -0.63762000 |
| C | 8.09369300  | -3.72454000 | -0.08854500 |
| C | 5.90589900  | -4.98823400 | -0.15066900 |
| C | 3.69180200  | -3.73690200 | -0.20766800 |
| C | 1.50498300  | -2.45317200 | -0.18360300 |
| C | 7.37569300  | -4.98392300 | -0.58698900 |
| H | 5.84137300  | -5.05571200 | 0.95161600  |
| C | 2.95644200  | -4.95547400 | -0.78043400 |
| C | 0.77223900  | -1.16366400 | -0.58985900 |
| C | 0.75437100  | -3.69706400 | -0.68747500 |
| H | 7.88568300  | -5.88647700 | -0.20176100 |
| C | 1.50483500  | -4.98013800 | -0.32013000 |
| H | 2.98648700  | -4.91357600 | -1.87820100 |
| C | -0.69096300 | -1.17329100 | -0.11399300 |

|   |             |             |             |
|---|-------------|-------------|-------------|
| C | -0.69207800 | -3.70619800 | -0.16992900 |
| H | 1.00783500  | -5.84967300 | -0.76023500 |
| C | -1.43613800 | -2.42965000 | -0.59520100 |
| C | -1.45475300 | -4.96155200 | -0.60165400 |
| C | -2.90054100 | -2.43467100 | -0.12176200 |
| C | -2.90004700 | -4.95073100 | -0.12127600 |
| H | -1.43247100 | -5.03355600 | -1.70043900 |
| C | -3.61223900 | -1.14940000 | -0.56839400 |
| C | -3.63229400 | -3.69669600 | -0.61659800 |
| H | -3.41010100 | -5.86258800 | -0.45599000 |
| C | -5.07684600 | -1.15759200 | -0.08385600 |
| C | -5.10610700 | -3.69836700 | -0.16297500 |
| C | -5.81679300 | -2.40357500 | -0.62602500 |
| C | -5.85628400 | -4.92655000 | -0.72221800 |
| C | -7.28899000 | -2.40973900 | -0.14270300 |
| H | -5.35754100 | -5.85793500 | -0.39324100 |
| C | -7.32128700 | -4.93783700 | -0.27000300 |
| C | -8.03435000 | -3.64532300 | -0.68389700 |
| C | -8.00347300 | -1.12235700 | -0.58932600 |
| H | -7.84257000 | -5.81175300 | -0.70280300 |
| C | -8.00600400 | 3.92367600  | -0.42988700 |
| C | -7.99403700 | 1.40018900  | -0.50339100 |
| C | -7.28381800 | 5.18092000  | 0.06804500  |
| C | -7.27037400 | 2.64939100  | 0.02859900  |
| C | -7.26989300 | 0.11936500  | -0.05293300 |
| C | -5.81853800 | 5.18841100  | -0.38327900 |
| H | -7.79818000 | 6.08512300  | -0.30716600 |
| C | -5.79759200 | 2.66456000  | -0.45296700 |
| C | -5.80064800 | 0.13058300  | -0.54103500 |
| C | -5.07792400 | 3.92073600  | 0.09478000  |
| H | -5.76557700 | 5.26114200  | -1.48595000 |
| C | -5.06789900 | 1.37905500  | 0.00444300  |
| C | -3.60345300 | 3.93905700  | -0.35676300 |
| C | -3.60242000 | 1.39241800  | -0.47751200 |
| C | -2.86313900 | 5.15225500  | 0.22182400  |
| C | -2.88163500 | 2.64092700  | 0.05261600  |
| C | -2.88310300 | 0.10213300  | -0.05340000 |
| C | -1.41508100 | 5.18325900  | -0.24967700 |
| H | -3.36451400 | 6.08732400  | -0.05701000 |
| C | -1.41647400 | 2.65679100  | -0.41765400 |
| C | -1.42218200 | 0.11328800  | -0.52772400 |
| C | -0.66349600 | 3.89498900  | 0.09682500  |
| H | -1.38540400 | 5.33136500  | -1.34052300 |
| C | -0.68208500 | 1.36379100  | -0.02699400 |
| C | 0.78319200  | 3.91003700  | -0.42032500 |
| C | 0.78250200  | 1.37624900  | -0.49896500 |
| C | 1.54373200  | 5.16102200  | 0.02841800  |
| C | 1.52454900  | 2.62918200  | -0.00351100 |
| C | 1.51040500  | 0.08714400  | -0.08715100 |
| C | 2.99439200  | 5.15511100  | -0.43561600 |

|   |             |             |             |
|---|-------------|-------------|-------------|
| H | 1.05257900  | 6.06030900  | -0.35470500 |
| C | 2.99397000  | 2.63855400  | -0.46016800 |
| C | 2.97672400  | 0.09783900  | -0.54261200 |
| C | 3.72120000  | 3.89588000  | 0.05398200  |
| H | 3.02312500  | 5.18635700  | -1.53379200 |
| C | 3.70011600  | 1.34878300  | -0.01765000 |
| C | 5.19945600  | 3.89988100  | -0.38548900 |
| C | 5.17170300  | 1.35826500  | -0.48094400 |
| C | 5.94455200  | 5.12388200  | 0.18925300  |
| C | 5.90515600  | 2.60188600  | 0.07588400  |
| C | 5.88895900  | 0.06900600  | -0.01586300 |
| C | 7.41378700  | 5.13761300  | -0.24862000 |
| H | 5.44931500  | 6.05773200  | -0.13861400 |
| C | 7.38260300  | 2.60993000  | -0.39132200 |
| C | 7.36389200  | 0.07932400  | -0.48684200 |
| C | 8.12252800  | 3.84245900  | 0.16402700  |
| H | 7.47930900  | 5.27066700  | -1.34557400 |
| C | 8.09211800  | 1.32064800  | 0.05768000  |
| H | -8.10509400 | -3.59290300 | -1.78662800 |
| H | -8.06318400 | -1.08264200 | -1.69277700 |
| H | -9.03903000 | 1.38812700  | -0.14400300 |
| H | -9.04665100 | 3.91317900  | -0.05777500 |
| H | 8.18319200  | 3.78372300  | 1.26711200  |
| H | 9.14035200  | 1.32591200  | -0.29269600 |
| H | 8.13339600  | -1.23326500 | 1.07762900  |
| H | 9.13803300  | -3.71680700 | -0.45048400 |
| H | -0.66956800 | 1.31371400  | 1.07749900  |
| H | -0.67722500 | -1.20311900 | 0.99016400  |
| H | 1.50934000  | 0.04565000  | 1.01825800  |
| H | -1.43243100 | 0.15260200  | -1.63386500 |
| H | 0.77468700  | 1.41455900  | -1.60430200 |
| H | 0.76365800  | -1.12218400 | -1.69531600 |
| H | -1.42996200 | 2.71340500  | -1.52275200 |
| H | -2.87255200 | 2.58872100  | 1.15571700  |
| H | -3.59065600 | 1.43992800  | -1.58654700 |
| H | -2.87149800 | 0.05509800  | 1.04871500  |
| H | -3.60116900 | -1.11890800 | -1.67827800 |
| H | -2.89189000 | -2.44976800 | 0.98148400  |
| H | -1.45057200 | -2.40804700 | -1.70192700 |
| H | -0.64690100 | -3.70438800 | 0.93401000  |
| H | 0.71487600  | -3.63533300 | -1.79011400 |
| H | 1.50684800  | -2.49587800 | 0.92215300  |
| H | -0.62100100 | 3.81844400  | 1.19877800  |
| H | 0.74130000  | 3.92141400  | -1.52438100 |
| H | 1.52956500  | 2.59608500  | 1.10338600  |
| H | 2.99602100  | 2.67113300  | -1.56334200 |
| H | 3.67491300  | 1.31228100  | 1.09188800  |
| H | 2.97965400  | 0.13629700  | -1.64547400 |
| H | 3.66311900  | -1.23314700 | 1.00359300  |
| H | 2.98078200  | -2.39971300 | -1.74048600 |



|   |             |             |             |
|---|-------------|-------------|-------------|
| H | -5.08280100 | -1.19499400 | 1.03271700  |
| H | -5.80884800 | -2.36952000 | -1.74064100 |
| H | -5.13797400 | -3.74214300 | 0.95248700  |
| H | -3.59832300 | -3.69101200 | -1.72487100 |
| H | -5.80428100 | -4.92743700 | -1.82728300 |
| H | -7.37568800 | -5.06306900 | 0.82850500  |
| H | -9.07478500 | -3.65172600 | -0.31122300 |
| H | -7.29618600 | -2.45378300 | 0.97346800  |
| H | -9.04849000 | -1.12701100 | -0.22992700 |
| H | -5.79604000 | 0.16928300  | -1.65568600 |
| H | -7.27503700 | 0.08100800  | 1.06368900  |
| H | -8.05426100 | 1.43539000  | -1.60700600 |
| H | -7.27904300 | 2.61902800  | 1.14510000  |
| H | -5.78899500 | 2.70462000  | -1.56748900 |
| H | -5.07771500 | 1.33878600  | 1.12014000  |
| H | -8.07671900 | 3.94445900  | -1.53372100 |
| H | -7.33865400 | 5.23485600  | 1.17228000  |
| H | -5.31330700 | 6.09271200  | 0.00594600  |
| H | -5.11139800 | 3.89233300  | 1.21044000  |
| H | -3.56797400 | 4.00579000  | -1.46272200 |
| H | 3.67663300  | 3.87765400  | 1.16166200  |
| H | 5.24234500  | 3.95255100  | -1.49998600 |
| H | 9.16659000  | 3.85101600  | -0.19862700 |
| H | 7.93097100  | 6.00867200  | 0.19509500  |
| H | 5.88161100  | 5.11812400  | 1.29374200  |
| H | 3.50035700  | 6.06232300  | -0.08292800 |
| H | 1.50913700  | 5.22462900  | 1.12745600  |
| H | -0.91483300 | 6.04646200  | 0.19938800  |
| H | -2.88452800 | 5.09986500  | 1.31948500  |
| H | 8.14313500  | 1.27860000  | 1.16158400  |
| H | 9.13089300  | -1.19070900 | -0.37656900 |
| H | 8.15381600  | -3.73987000 | 1.01600600  |
| H | 7.44181000  | -5.04420400 | -1.69032100 |
| H | 5.40418200  | -5.89428300 | -0.54079300 |
| H | 3.45530100  | -5.88787600 | -0.48838700 |
| H | 1.46742100  | -5.11365600 | 0.77314100  |
| H | -0.95964000 | -5.85830100 | -0.21702100 |
| H | -2.91561000 | -4.96778600 | 0.97806500  |
| H | 5.88564700  | 2.56116600  | 1.19023100  |
| H | 5.19586400  | 1.39866400  | -1.59613900 |
| H | 5.87220900  | 0.03135900  | 1.09877200  |
| H | 5.18770300  | -1.14553900 | -1.68256900 |
| H | 5.86554200  | -2.49848700 | 1.01943500  |
| H | 5.21610400  | -3.70119900 | -1.75883800 |
| H | 3.64451600  | -3.79223500 | 0.89897100  |
| H | 7.38260200  | 0.11661900  | -1.60318000 |
| H | 7.38449000  | -2.42715300 | -1.67731900 |
| H | 7.40257800  | 2.65937400  | -1.50694900 |
| C | -1.29020200 | -2.39430000 | 3.47202500  |
| C | 0.10159400  | -2.45226900 | 3.51998800  |

|   |             |             |            |
|---|-------------|-------------|------------|
| C | 0.81222600  | -1.25737000 | 3.57232400 |
| C | 0.10130900  | -0.06145700 | 3.57885500 |
| C | -1.29039000 | -0.11729800 | 3.52774600 |
| N | -1.98584500 | -1.25523000 | 3.47231300 |
| H | 1.89860300  | -1.25780800 | 3.59906200 |
| H | -1.87579100 | -3.31068300 | 3.42199000 |
| H | 0.60980400  | -3.41152200 | 3.50500200 |
| H | 0.60908100  | 0.89769300  | 3.61162300 |
| H | -1.87609800 | 0.80035000  | 3.52131100 |

Graphane-U5C

|   |             |            |             |
|---|-------------|------------|-------------|
| C | -5.19165700 | 1.32187900 | -0.43063800 |
| C | -5.92544000 | 2.56292000 | 0.13139000  |
| C | -3.72029000 | 1.31293400 | 0.03383500  |
| C | -8.11226300 | 1.27998000 | 0.10663300  |
| C | -7.40368800 | 2.57281300 | -0.33343000 |
| C | -5.22228900 | 3.86324200 | -0.32737300 |
| C | -3.01627700 | 2.60217200 | -0.41433600 |
| C | -8.14296400 | 3.80116800 | 0.23212300  |
| C | -5.96527300 | 5.08378600 | 0.25757400  |
| C | -3.74108400 | 3.85996700 | 0.10233400  |
| C | -1.54309900 | 2.59598400 | 0.03076800  |
| C | -7.43637300 | 5.09961300 | -0.17408900 |
| H | -5.89765300 | 5.07144300 | 1.36175600  |
| C | -3.01983200 | 5.11895800 | -0.39646200 |
| C | -0.80481800 | 1.33955700 | -0.46120600 |
| C | -0.80832600 | 3.87438300 | -0.40552700 |
| H | -7.95219500 | 5.96716700 | 0.27791400  |
| C | -1.56348900 | 5.12647900 | 0.04946600  |
| H | -3.06157600 | 5.14934500 | -1.49428800 |
| C | 0.66389700  | 1.33428100 | -0.00369400 |
| C | 0.64729700  | 3.86595900 | 0.08605100  |
| H | -1.07822900 | 6.02534500 | -0.34210900 |
| C | 1.39245000  | 2.62112500 | -0.42393600 |
| C | 1.39195200  | 5.14908900 | -0.29343300 |
| C | 2.86410300  | 2.61389100 | 0.02653500  |
| C | 2.84834100  | 5.12710300 | 0.15252200  |
| H | 1.34295700  | 5.27967600 | -1.38583300 |
| C | 3.57931300  | 1.35550900 | -0.48705600 |
| C | 3.57976900  | 3.90415000 | -0.41698900 |
| H | 3.34389700  | 6.05732600 | -0.15183100 |
| C | 5.04978800  | 1.35258100 | -0.01907800 |
| C | 5.06127600  | 3.89529700 | 0.01189300  |
| C | 5.77388400  | 2.62653300 | -0.51582000 |
| C | 5.79437200  | 5.15092800 | -0.50776800 |
| C | 7.25271700  | 2.62327700 | -0.05282700 |
| H | 5.29430900  | 6.06434300 | -0.13327300 |
| C | 7.26618300  | 5.15481600 | -0.07815800 |
| C | 7.98167100  | 3.88520500 | -0.55408100 |
| C | 7.97006800  | 1.36035500 | -0.56047100 |

|   |             |             |             |
|---|-------------|-------------|-------------|
| H | 7.77462900  | 6.04905800  | -0.48410400 |
| C | 8.01049600  | -3.68856900 | -0.60455400 |
| C | 7.97977400  | -1.16392600 | -0.57705300 |
| C | 7.30175900  | -4.96973300 | -0.14996800 |
| C | 7.27027100  | -2.43901700 | -0.08906000 |
| C | 7.25182600  | 0.09212600  | -0.06705200 |
| C | 5.83268100  | -4.97052200 | -0.58863500 |
| H | 7.81920300  | -5.85467900 | -0.56481300 |
| C | 5.79350600  | -2.44574700 | -0.55811800 |
| C | 5.77746400  | 0.09060500  | -0.53946800 |
| C | 5.08681400  | -3.72808800 | -0.05580100 |
| H | 5.77048300  | -5.00120100 | -1.69283500 |
| C | 5.05833000  | -1.18557300 | -0.04270000 |
| C | 3.60959600  | -3.73938000 | -0.49913000 |
| C | 3.58989200  | -1.18934300 | -0.51713500 |
| C | 2.87858100  | -4.97549200 | 0.04136400  |
| C | 2.88076900  | -2.46384700 | -0.03717000 |
| C | 2.86373500  | 0.07474700  | -0.02966200 |
| C | 1.43328100  | -5.00301100 | -0.43856400 |
| H | 3.38831800  | -5.89869000 | -0.26107700 |
| C | 1.41630600  | -2.46857700 | -0.50816100 |
| C | 1.39945100  | 0.07651400  | -0.49267800 |
| C | 0.66841700  | -3.73321300 | -0.05535400 |
| H | 1.41223300  | -5.11601900 | -1.53393700 |
| C | 0.67241500  | -1.20308800 | -0.05047600 |
| C | -0.76833400 | -3.73476000 | -0.60057900 |
| C | -0.79136300 | -1.20040000 | -0.52507700 |
| C | -1.52469200 | -5.01731900 | -0.24439000 |
| C | -1.52789300 | -2.48820500 | -0.11940700 |
| C | -1.52940100 | 0.05387400  | -0.03156000 |
| C | -2.96812800 | -4.99130900 | -0.73096700 |
| H | -1.01930200 | -5.88614100 | -0.67664900 |
| C | -2.99271700 | -2.47858400 | -0.58830200 |
| C | -2.99569200 | 0.06156300  | -0.48845300 |
| C | -3.71257600 | -3.77389100 | -0.16732600 |
| H | -2.97910400 | -4.94687200 | -1.82902100 |
| C | -3.71105000 | -1.22895700 | -0.05771400 |
| C | -5.18692000 | -3.75823100 | -0.61959300 |
| C | -5.18034800 | -1.21599100 | -0.52814900 |
| C | -5.92619800 | -5.02723000 | -0.14364600 |
| C | -5.90622200 | -2.50309400 | -0.06849300 |
| C | -5.90928600 | 0.03024400  | 0.02717000  |
| C | -7.39255100 | -5.01865500 | -0.59126300 |
| H | -5.42171900 | -5.93008900 | -0.53743500 |
| C | -7.38126000 | -2.48734900 | -0.54272400 |
| C | -7.38304000 | 0.04333800  | -0.44731300 |
| C | -8.11400500 | -3.76392100 | -0.08615900 |
| H | -7.45020100 | -5.06826800 | -1.69558900 |
| C | -8.10275500 | -1.24118400 | -0.00051300 |
| H | 8.03662100  | 3.87789100  | -1.65901300 |

|   |             |             |             |
|---|-------------|-------------|-------------|
| H | 8.01645900  | 1.36631000  | -1.66534900 |
| H | 9.02856900  | -1.15903800 | -0.22872600 |
| H | 9.05461400  | -3.68526600 | -0.24226400 |
| H | -8.18071500 | -3.78899400 | 1.01786400  |
| H | -9.14981900 | -1.22822400 | -0.35406600 |
| H | -8.16255200 | 1.22975300  | 1.21023700  |
| H | -9.18807000 | 3.81134500  | -0.12729700 |
| H | 0.66748200  | -1.20851400 | 1.05490900  |
| H | 0.66298600  | 1.29939800  | 1.10016000  |
| H | -1.52414200 | 0.02390000  | 1.07528900  |
| H | 1.40145700  | 0.09632300  | -1.59948800 |
| H | -0.78118400 | -1.16493800 | -1.63059500 |
| H | -0.80943900 | 1.36693700  | -1.56701800 |
| H | 1.42982600  | -2.47027700 | -1.61504200 |
| H | 2.86838700  | -2.45525100 | 1.06578200  |
| H | 3.57301800  | -1.18553300 | -1.62721400 |
| H | 2.85428300  | 0.05935400  | 1.07373200  |
| H | 3.55690000  | 1.37999100  | -1.59656400 |
| H | 2.86891400  | 2.58330000  | 1.13049300  |
| H | 1.39060400  | 2.66339400  | -1.52987300 |
| H | 0.62472500  | 3.80444800  | 1.18940700  |
| H | -0.78545800 | 3.87936000  | -1.51027700 |
| H | -1.53682400 | 2.57171200  | 1.13760400  |
| H | 0.60659300  | -3.69696600 | 1.04832300  |
| H | -0.70568400 | -3.67887700 | -1.70232600 |
| H | -1.55005200 | -2.52858500 | 0.98617000  |
| H | -2.98791300 | -2.43270700 | -1.69097500 |
| H | -3.69101200 | -1.27313800 | 1.05154500  |
| H | -2.99438100 | 0.10100600  | -1.59134700 |
| H | -3.69533900 | 1.27949700  | 1.14314200  |
| H | -3.02589800 | 2.63302600  | -1.51761100 |
| H | 5.07051100  | 1.34163100  | 1.09685100  |
| H | 5.75085700  | 2.64048800  | -1.63077200 |
| H | 5.11147800  | 3.89395800  | 1.12730500  |
| H | 3.52702300  | 3.95133500  | -1.52324100 |
| H | 5.72492400  | 5.19695700  | -1.61097700 |
| H | 7.33729500  | 5.23737600  | 1.02338100  |
| H | 9.02749900  | 3.88422700  | -0.19671500 |
| H | 7.27570900  | 2.62264200  | 1.06384800  |
| H | 9.01958200  | 1.35793200  | -0.21428200 |
| H | 5.76126900  | 0.10072800  | -1.65476100 |
| H | 7.26969800  | 0.08465500  | 1.04988800  |
| H | 8.02834300  | -1.15384900 | -1.68181000 |
| H | 7.28901400  | -2.45356400 | 1.02754700  |
| H | 5.77526700  | -2.44080000 | -1.67326900 |
| H | 5.07439600  | -1.19372700 | 1.07325500  |
| H | 8.07049400  | -3.66533100 | -1.70900500 |
| H | 7.36685900  | -5.06661600 | 0.95074900  |
| H | 5.33682900  | -5.89277300 | -0.23051900 |
| H | 5.12710800  | -3.74381200 | 1.05973600  |

|   |             |             |             |
|---|-------------|-------------|-------------|
| H | 3.56856700  | -3.76824400 | -1.60673400 |
| H | -3.67864000 | -3.82991200 | 0.93954800  |
| H | -5.22030300 | -3.72834300 | -1.73513500 |
| H | -9.15606600 | -3.75307700 | -0.45437000 |
| H | -7.90552700 | -5.92472200 | -0.21855300 |
| H | -5.87034400 | -5.10398100 | 0.95858500  |
| H | -3.47194500 | -5.92424900 | -0.44959000 |
| H | -1.50701600 | -5.15171700 | 0.84876000  |
| H | 0.93619200  | -5.88417300 | -0.02146800 |
| H | 2.89414400  | -4.95266800 | 1.14050700  |
| H | -8.15734500 | -1.28273900 | 1.10325400  |
| H | -9.16062600 | 1.28710400  | -0.24316200 |
| H | -8.20010300 | 3.73506700  | 1.33499300  |
| H | -7.50638900 | 5.24034400  | -1.26980600 |
| H | -5.47160700 | 6.01965400  | -0.06674900 |
| H | -3.52207000 | 6.02626800  | -0.03860500 |
| H | -1.51477200 | 5.19242400  | 1.14775500  |
| H | 0.89940400  | 6.01928800  | 0.15048400  |
| H | 2.88910800  | 5.09428300  | 1.25040200  |
| H | -5.89263300 | -2.54422800 | 1.04598500  |
| H | -5.19918600 | -1.17424000 | -1.64337900 |
| H | -5.89494400 | -0.01270000 | 1.14170900  |
| H | -5.21491400 | 1.36726700  | -1.54568500 |
| H | -5.90379200 | 2.51836900  | 1.24555800  |
| H | -5.27193000 | 3.92104400  | -1.44139800 |
| H | -3.68856500 | 3.84430500  | 1.20957800  |
| H | -7.39910900 | 0.09041500  | -1.56331200 |
| H | -7.42536400 | 2.63041900  | -1.44864300 |
| H | -7.39581200 | -2.45216000 | -1.65893200 |
| C | -0.09449000 | -1.54131100 | 3.74501300  |
| H | -0.70941500 | -1.88784700 | 2.90094800  |
| H | -0.63012700 | -1.83469600 | 4.65833400  |
| C | 1.29279300  | -2.11515300 | 3.69351300  |
| H | 1.51088600  | -3.17642700 | 3.71734000  |
| C | 2.18507400  | -1.11079400 | 3.61692400  |
| H | 3.26368600  | -1.21267200 | 3.56366900  |
| C | 0.14459600  | -0.05967100 | 3.68086700  |
| H | -0.64549800 | 0.68242400  | 3.69234100  |
| C | 1.46815400  | 0.17282600  | 3.60860700  |
| H | 1.94699200  | 1.14446500  | 3.54699100  |

#### Graphane-U5N

|   |             |            |             |
|---|-------------|------------|-------------|
| C | -5.17953000 | 1.33526400 | -0.43565400 |
| C | -5.90978500 | 2.58166000 | 0.11905500  |
| C | -3.70514600 | 1.32926300 | 0.01937300  |
| C | -8.09574800 | 1.29867900 | 0.12636700  |
| C | -7.39107000 | 2.58597300 | -0.33577100 |
| C | -5.20901500 | 3.87714800 | -0.35668500 |
| C | -3.00295900 | 2.61600100 | -0.43831100 |
| C | -8.12706900 | 3.82124100 | 0.21886700  |

|   |             |             |             |
|---|-------------|-------------|-------------|
| C | -5.94995900 | 5.10434400  | 0.21681100  |
| C | -3.72703700 | 3.87732000  | 0.07023500  |
| C | -1.53081800 | 2.61120500  | 0.00927400  |
| C | -7.42308400 | 5.11444300  | -0.20800200 |
| H | -5.87728200 | 5.10507100  | 1.32077700  |
| C | -3.00520800 | 5.13214600  | -0.43788800 |
| C | -0.79118600 | 1.35434900  | -0.47985500 |
| C | -0.79283600 | 3.88849500  | -0.42468100 |
| H | -7.93690900 | 5.98771900  | 0.23506700  |
| C | -1.55122700 | 5.14400400  | 0.01551100  |
| H | -3.04196200 | 5.15175500  | -1.53613600 |
| C | 0.67399800  | 1.34722100  | -0.01075100 |
| C | 0.65607400  | 3.88019700  | 0.08629200  |
| H | -1.06363200 | 6.03963100  | -0.38087400 |
| C | 1.40790500  | 2.63611700  | -0.41535800 |
| C | 1.40673800  | 5.16371100  | -0.27904400 |
| C | 2.87281300  | 2.62672200  | 0.05679300  |
| C | 2.85471400  | 5.14032400  | 0.19332500  |
| H | 1.37701500  | 5.29618000  | -1.37188300 |
| C | 3.59608600  | 1.37269500  | -0.45582400 |
| C | 3.59633100  | 3.91941800  | -0.36683600 |
| H | 3.35623200  | 6.07131400  | -0.09859500 |
| C | 5.05925200  | 1.36425000  | 0.03557100  |
| C | 5.06939900  | 3.90713800  | 0.09065800  |
| C | 5.79171900  | 2.64334300  | -0.43555100 |
| C | 5.81226300  | 5.16734300  | -0.40314200 |
| C | 7.26206600  | 2.63501400  | 0.05356900  |
| H | 5.30524300  | 6.07735900  | -0.02948300 |
| C | 7.27563200  | 5.16683200  | 0.05418000  |
| C | 7.99994400  | 3.90203600  | -0.42100200 |
| C | 7.98834500  | 1.37799100  | -0.45595400 |
| H | 7.79155200  | 6.06504300  | -0.33338300 |
| C | 8.02955800  | -3.66741600 | -0.58767700 |
| C | 7.99836900  | -1.14465100 | -0.51039700 |
| C | 7.31330000  | -4.95794500 | -0.17355300 |
| C | 7.28092200  | -2.42854600 | -0.05871700 |
| C | 7.26179900  | 0.10317800  | 0.00729300  |
| C | 5.85184700  | -4.94832500 | -0.63666700 |
| H | 7.83750600  | -5.83359800 | -0.59987400 |
| C | 5.81182200  | -2.42545500 | -0.55145400 |
| C | 5.79520200  | 0.10884200  | -0.48891200 |
| C | 5.09719000  | -3.71799000 | -0.08850900 |
| H | 5.80804200  | -4.95419700 | -1.74226500 |
| C | 5.06854800  | -1.17506600 | -0.02352000 |
| C | 3.62689200  | -3.71887100 | -0.55569000 |
| C | 3.60617600  | -1.17056500 | -0.51830200 |
| C | 2.88999100  | -4.97065400 | -0.06217100 |
| C | 2.89038500  | -2.45453700 | -0.07417800 |
| C | 2.87332600  | 0.08701800  | -0.02385400 |
| C | 1.44790600  | -4.98121600 | -0.55236800 |

|   |             |             |             |
|---|-------------|-------------|-------------|
| H | 3.40278600  | -5.88335100 | -0.39014200 |
| C | 1.42833300  | -2.44926200 | -0.55427400 |
| C | 1.41361600  | 0.09268900  | -0.50209300 |
| C | 0.68343000  | -3.72472900 | -0.12775800 |
| H | 1.43323700  | -5.05645000 | -1.65103700 |
| C | 0.68381000  | -1.19091700 | -0.07716400 |
| C | -0.76088000 | -3.71558500 | -0.65027000 |
| C | -0.77909800 | -1.18427000 | -0.55425500 |
| C | -1.50957200 | -5.00157800 | -0.28890200 |
| C | -1.50967600 | -2.47283200 | -0.14093700 |
| C | -1.51541700 | 0.06795000  | -0.05291300 |
| C | -2.96319500 | -4.97404400 | -0.74251500 |
| H | -1.01424300 | -5.86761200 | -0.73834000 |
| C | -2.98125500 | -2.46318100 | -0.58964500 |
| C | -2.98385200 | 0.07556400  | -0.50168800 |
| C | -3.69513700 | -3.75849500 | -0.15866500 |
| H | -2.99888400 | -4.92545900 | -1.83993300 |
| C | -3.69446300 | -1.21241400 | -0.05563500 |
| C | -5.17749000 | -3.74486800 | -0.58438100 |
| C | -5.16888000 | -1.20289900 | -0.51081900 |
| C | -5.90798900 | -5.01023200 | -0.08521400 |
| C | -5.88871400 | -2.48610500 | -0.03174800 |
| C | -5.89279500 | 0.04792800  | 0.04067800  |
| C | -7.38129500 | -5.00708700 | -0.50955700 |
| H | -5.40862700 | -5.91621400 | -0.47822500 |
| C | -7.37012600 | -2.47543900 | -0.48607600 |
| C | -7.37122400 | 0.05548600  | -0.41896600 |
| C | -8.09562200 | -3.74757400 | -0.00596000 |
| H | -7.45630000 | -5.06787700 | -1.61223300 |
| C | -8.08523700 | -1.22375700 | 0.05169300  |
| H | 8.07555200  | 3.90615700  | -1.52479800 |
| H | 8.05554500  | 1.39814200  | -1.55972900 |
| H | 9.04082500  | -1.14607200 | -0.14320700 |
| H | 9.06740500  | -3.67235500 | -0.20759700 |
| H | -8.14520500 | -3.76166100 | 1.09917600  |
| H | -9.13678300 | -1.21496800 | -0.28810800 |
| H | -8.13576200 | 1.26186400  | 1.23094600  |
| H | -9.17437200 | 3.82672600  | -0.13407900 |
| H | 0.66661300  | -1.21312900 | 1.02696300  |
| H | 0.66026200  | 1.30331800  | 1.09313900  |
| H | -1.50391600 | 0.03098100  | 1.05200300  |
| H | 1.42812800  | 0.12320000  | -1.60851900 |
| H | -0.77246300 | -1.14685900 | -1.66020900 |
| H | -0.78814600 | 1.38360700  | -1.58572000 |
| H | 1.44966400  | -2.43095500 | -1.66092200 |
| H | 2.86505700  | -2.47311200 | 1.02984200  |
| H | 3.60578600  | -1.14872000 | -1.62781700 |
| H | 2.84768500  | 0.05909200  | 1.07943400  |
| H | 3.59197300  | 1.40736900  | -1.56502800 |
| H | 2.86072100  | 2.58909200  | 1.16074600  |

|   |             |             |             |
|---|-------------|-------------|-------------|
| H | 1.42260800  | 2.68166700  | -1.52099900 |
| H | 0.61732000  | 3.81724100  | 1.18907400  |
| H | -0.75645600 | 3.88865300  | -1.52905400 |
| H | -1.52823200 | 2.58720700  | 1.11603000  |
| H | 0.63106000  | -3.71648000 | 0.97529000  |
| H | -0.71965900 | -3.64960200 | -1.75274200 |
| H | -1.50184500 | -2.51280800 | 0.96444600  |
| H | -2.99118300 | -2.41973400 | -1.69267500 |
| H | -3.66150400 | -1.25052900 | 1.05332700  |
| H | -2.99203000 | 0.10826000  | -1.60492400 |
| H | -3.67309400 | 1.30114600  | 1.12862800  |
| H | -3.01237800 | 2.63951100  | -1.54177600 |
| H | 5.06316500  | 1.34149900  | 1.15100700  |
| H | 5.78867000  | 2.66806400  | -1.55067200 |
| H | 5.09815800  | 3.89589700  | 1.20666700  |
| H | 3.56512300  | 3.97130500  | -1.47362500 |
| H | 5.76345900  | 5.22419800  | -1.50699300 |
| H | 7.32619100  | 5.23881900  | 1.15756400  |
| H | 9.03902100  | 3.89745000  | -0.04436900 |
| H | 7.26561100  | 2.62222500  | 1.17029100  |
| H | 9.03140700  | 1.37112200  | -0.09060500 |
| H | 5.79758500  | 0.13469200  | -1.60429400 |
| H | 7.26223600  | 0.07917400  | 1.12393500  |
| H | 8.06754600  | -1.11522600 | -1.61387800 |
| H | 7.28245100  | -2.46552000 | 1.05733400  |
| H | 5.81198000  | -2.39758700 | -1.66664100 |
| H | 5.07116700  | -1.20253300 | 1.09131800  |
| H | 8.10894700  | -3.62061000 | -1.69027800 |
| H | 7.36057100  | -5.08022800 | 0.92545000  |
| H | 5.35021600  | -5.87856400 | -0.30829800 |
| H | 5.12020300  | -3.75938800 | 1.02648800  |
| H | 3.60369300  | -3.71666800 | -1.66384400 |
| H | -3.64004700 | -3.81820800 | 0.94706100  |
| H | -5.23036900 | -3.72381100 | -1.69939700 |
| H | -9.14311800 | -3.74060300 | -0.35825200 |
| H | -7.88761900 | -5.90949800 | -0.11943900 |
| H | -5.83449900 | -5.07635600 | 1.01671400  |
| H | -3.46048500 | -5.90830800 | -0.45345200 |
| H | -1.46775700 | -5.14297500 | 0.80271400  |
| H | 0.95012900  | -5.87673200 | -0.16865000 |
| H | 2.89681000  | -4.98510200 | 1.03758800  |
| H | -8.12494000 | -1.25292100 | 1.15651100  |
| H | -9.14718200 | 1.30137700  | -0.21390300 |
| H | -8.17718700 | 3.76890100  | 1.32282900  |
| H | -7.49839500 | 5.24052900  | -1.30511400 |
| H | -5.45812300 | 6.03634600  | -0.12096900 |
| H | -3.50920600 | 6.04278000  | -0.09104100 |
| H | -1.50911200 | 5.21936500  | 1.11349900  |
| H | 0.90651300  | 6.03316500  | 0.15764400  |
| H | 2.87510500  | 5.10388100  | 1.29172000  |



|   |             |             |             |
|---|-------------|-------------|-------------|
| H | -5.85924900 | -2.51896800 | 1.08272500  |
| H | -5.19942100 | -1.17105700 | -1.62604700 |
| H | -5.86696100 | 0.01494700  | 1.15543900  |
| H | -5.21039100 | 1.36951300  | -1.55078900 |
| H | -5.88070200 | 2.54790500  | 1.23351200  |
| H | -5.26149200 | 3.92249600  | -1.47101300 |
| H | -3.67296700 | 3.86977700  | 1.17752900  |
| H | -7.39862400 | 0.08842300  | -1.53521300 |
| H | -7.42046200 | 2.62905000  | -1.45140600 |
| H | -7.39963800 | -2.45232100 | -1.60230200 |
| C | 1.20557500  | -0.09069100 | 3.51634000  |
| C | -0.13873000 | -0.36436700 | 3.61623000  |
| C | -0.28448100 | -1.77980300 | 3.61221400  |
| C | 0.97657500  | -2.32102300 | 3.51082400  |
| N | 1.87061900  | -1.28559900 | 3.45534100  |
| H | 2.86893800  | -1.38756700 | 3.35664600  |
| H | 1.74066900  | 0.84720500  | 3.48505600  |
| H | -0.92841400 | 0.37039600  | 3.68901500  |
| H | -1.20772900 | -2.33755400 | 3.68216100  |
| H | 1.31097000  | -3.34749000 | 3.47746100  |

#### Graphane-U5O

|   |             |            |             |
|---|-------------|------------|-------------|
| C | -5.15396300 | 1.35806400 | -0.45585200 |
| C | -5.88618500 | 2.60482500 | 0.09547800  |
| C | -3.68256600 | 1.34878700 | 0.00821400  |
| C | -8.07426000 | 1.32574100 | 0.08406800  |
| C | -7.36369100 | 2.61214200 | -0.37146100 |
| C | -5.17911900 | 3.89997200 | -0.37175100 |
| C | -2.97477300 | 2.63601500 | -0.43916100 |
| C | -8.10230400 | 3.84807900 | 0.17808700  |
| C | -5.92312600 | 5.12745400 | 0.19701000  |
| C | -3.70110500 | 3.89640900 | 0.06860900  |
| C | -1.50597000 | 2.62697600 | 0.01955300  |
| C | -7.39234600 | 5.14052100 | -0.24097500 |
| H | -5.86032600 | 5.12669100 | 1.30155400  |
| C | -2.97260200 | 5.15247900 | -0.42659400 |
| C | -0.76462800 | 1.37152300 | -0.47061800 |
| C | -0.76257600 | 3.90534800 | -0.40122000 |
| H | -7.90866800 | 6.01421900 | 0.19843300  |
| C | -1.52268500 | 5.15943200 | 0.03968000  |
| H | -2.99965200 | 5.17789400 | -1.52497800 |
| C | 0.69885200  | 1.35828300 | 0.00477300  |
| C | 0.68228300  | 3.89104000 | 0.12077600  |
| H | -1.03005300 | 6.05625600 | -0.34738400 |
| C | 1.43619700  | 2.64998300 | -0.38535700 |
| C | 1.43691600  | 5.17662500 | -0.22901900 |
| C | 2.89864900  | 2.63461100 | 0.09338300  |
| C | 2.88225100  | 5.14679000 | 0.25070400  |
| H | 1.41308700  | 5.31872300 | -1.32081400 |
| C | 3.62096500  | 1.38376600 | -0.42843200 |

|   |             |             |             |
|---|-------------|-------------|-------------|
| C | 3.62476700  | 3.92999100  | -0.31720200 |
| H | 3.38613000  | 6.07992100  | -0.03012000 |
| C | 5.08345400  | 1.36933600  | 0.06332800  |
| C | 5.09573100  | 3.91156400  | 0.14599200  |
| C | 5.81803200  | 2.65289700  | -0.39223700 |
| C | 5.84164300  | 5.17681400  | -0.33007300 |
| C | 7.28716000  | 2.63732100  | 0.10032100  |
| H | 5.33442400  | 6.08286600  | 0.05257800  |
| C | 7.30328500  | 5.16897600  | 0.13274800  |
| C | 8.02779000  | 3.90948800  | -0.35599800 |
| C | 8.01348400  | 1.38626000  | -0.42361300 |
| H | 7.82164100  | 6.07150400  | -0.24105300 |
| C | 8.04891400  | -3.65748900 | -0.61515600 |
| C | 8.02048900  | -1.13550100 | -0.51037800 |
| C | 7.33141100  | -4.95143400 | -0.21386900 |
| C | 7.30125600  | -2.42347800 | -0.07349300 |
| C | 7.28454300  | 0.10653200  | 0.02205400  |
| C | 5.86978800  | -4.93563500 | -0.67651000 |
| H | 7.85466300  | -5.82336300 | -0.64860100 |
| C | 5.83233900  | -2.41351200 | -0.56679400 |
| C | 5.81862900  | 0.11972900  | -0.47599300 |
| C | 5.11696800  | -3.70977700 | -0.11571700 |
| H | 5.82574400  | -4.93013200 | -1.78201800 |
| C | 5.09022600  | -1.16832400 | -0.02542400 |
| C | 3.64614300  | -3.70481600 | -0.58002500 |
| C | 3.62825000  | -1.15666500 | -0.51933400 |
| C | 2.90993900  | -4.96043200 | -0.09487500 |
| C | 2.91194600  | -2.44371800 | -0.08617300 |
| C | 2.89645600  | 0.09476800  | -0.00775800 |
| C | 1.46600900  | -4.96619000 | -0.57933400 |
| H | 3.42055600  | -5.87066000 | -0.43304400 |
| C | 1.44905800  | -2.43550000 | -0.56425400 |
| C | 1.43888100  | 0.10667300  | -0.49236000 |
| C | 0.70475700  | -3.71241800 | -0.14087300 |
| H | 1.44635500  | -5.03194300 | -1.67854500 |
| C | 0.70499500  | -1.17913000 | -0.08129100 |
| C | -0.74293400 | -3.70077600 | -0.65438400 |
| C | -0.75782700 | -1.16788200 | -0.55787600 |
| C | -1.49330000 | -4.98306000 | -0.28365700 |
| C | -1.49051400 | -2.45610600 | -0.14761200 |
| C | -1.49421100 | 0.08441400  | -0.05604600 |
| C | -2.94627900 | -4.95765600 | -0.73938700 |
| H | -0.99886100 | -5.85362900 | -0.72478900 |
| C | -2.96120300 | -2.44500500 | -0.59964000 |
| C | -2.96026900 | 0.09540300  | -0.51214300 |
| C | -3.67882000 | -3.73755400 | -0.16615800 |
| H | -2.97968300 | -4.91733700 | -1.83716600 |
| C | -3.67464200 | -1.19220800 | -0.07067000 |
| C | -5.15888600 | -3.72330100 | -0.59957400 |
| C | -5.14709100 | -1.18073600 | -0.53182900 |

|   |             |             |             |
|---|-------------|-------------|-------------|
| C | -5.89406200 | -4.98613600 | -0.10100300 |
| C | -5.87150000 | -2.46207500 | -0.05445500 |
| C | -5.87233800 | 0.07147400  | 0.01482800  |
| C | -7.36467900 | -4.98218200 | -0.53454900 |
| H | -5.39373800 | -5.89404700 | -0.48840700 |
| C | -7.35000800 | -2.45033100 | -0.51825900 |
| C | -7.34756300 | 0.08118200  | -0.45515300 |
| C | -8.08047100 | -3.72013900 | -0.03953200 |
| H | -7.43289600 | -5.04652700 | -1.63749400 |
| C | -8.06697100 | -1.19642000 | 0.01173600  |
| H | 8.10687600  | 3.92725400  | -1.45936500 |
| H | 8.08300900  | 1.42017900  | -1.52682100 |
| H | 9.06262600  | -1.14224600 | -0.14253400 |
| H | 9.08662700  | -3.66714400 | -0.23492800 |
| H | -8.13791100 | -3.73108800 | 1.06525000  |
| H | -9.11582900 | -1.18653500 | -0.33648400 |
| H | -8.12427300 | 1.28881000  | 1.18822500  |
| H | -9.14643200 | 3.85586200  | -0.18426100 |
| H | 0.68800400  | -1.21190800 | 1.02274200  |
| H | 0.68535300  | 1.30738900  | 1.10931300  |
| H | -1.49136900 | 0.04365200  | 1.04879800  |
| H | 1.45580500  | 0.14586000  | -1.59826200 |
| H | -0.74952400 | -1.12815700 | -1.66353900 |
| H | -0.75364100 | 1.40704900  | -1.57603800 |
| H | 1.46711500  | -2.41142600 | -1.67076600 |
| H | 2.89245700  | -2.46785600 | 1.01722000  |
| H | 3.62585200  | -1.12227900 | -1.62880500 |
| H | 2.87113500  | 0.05239600  | 1.09470400  |
| H | 3.61740800  | 1.42808000  | -1.53756700 |
| H | 2.88318200  | 2.58685600  | 1.19608200  |
| H | 1.45535400  | 2.70288800  | -1.49053100 |
| H | 0.63566200  | 3.82005600  | 1.22285700  |
| H | -0.71742400 | 3.91162700  | -1.50519900 |
| H | -1.51253800 | 2.59767100  | 1.12642600  |
| H | 0.66273000  | -3.71180800 | 0.96264400  |
| H | -0.70742600 | -3.63925800 | -1.75730200 |
| H | -1.48765000 | -2.49684100 | 0.95806800  |
| H | -2.96833400 | -2.40455700 | -1.70271300 |
| H | -3.64710300 | -1.23010800 | 1.03884800  |
| H | -2.96339900 | 0.12987600  | -1.61522900 |
| H | -3.65785600 | 1.31653500  | 1.11771600  |
| H | -2.97544200 | 2.66378000  | -1.54250100 |
| H | 5.08594300  | 1.33220200  | 1.17888200  |
| H | 5.81776900  | 2.68975600  | -1.50696500 |
| H | 5.12018200  | 3.88676300  | 1.26199400  |
| H | 3.59786000  | 3.99186500  | -1.42368500 |
| H | 5.79721900  | 5.24655500  | -1.43333100 |
| H | 7.34954800  | 5.22621000  | 1.23721500  |
| H | 9.06557200  | 3.89893800  | 0.02400300  |
| H | 7.28760700  | 2.60990200  | 1.21686400  |

|   |             |             |             |
|---|-------------|-------------|-------------|
| H | 9.05556500  | 1.37360700  | -0.05576900 |
| H | 5.82215800  | 0.15867300  | -1.59083300 |
| H | 7.28267900  | 0.06815700  | 1.13848300  |
| H | 8.08981500  | -1.09322000 | -1.61331400 |
| H | 7.30150900  | -2.47226700 | 1.04229000  |
| H | 5.83246300  | -2.37444900 | -1.68145700 |
| H | 5.09129900  | -1.20772100 | 1.09000100  |
| H | 8.12819500  | -3.59946700 | -1.71714200 |
| H | 7.37836100  | -5.08399100 | 0.88402400  |
| H | 5.36738400  | -5.86844200 | -0.35704900 |
| H | 5.14147900  | -3.76084700 | 0.99917600  |
| H | 3.62031300  | -3.69370500 | -1.68819900 |
| H | -3.62951400 | -3.79145100 | 0.94026300  |
| H | -5.20573100 | -3.70540000 | -1.71498700 |
| H | -9.12552500 | -3.71272400 | -0.39916200 |
| H | -7.87474800 | -5.88268400 | -0.14479000 |
| H | -5.82744500 | -5.04929900 | 1.00149600  |
| H | -3.44499900 | -5.88926400 | -0.44441900 |
| H | -1.45234600 | -5.11515400 | 0.80952000  |
| H | 0.96948200  | -5.86466800 | -0.20093200 |
| H | 2.92108500  | -4.98442000 | 1.00451900  |
| H | -8.11578400 | -1.22380400 | 1.11622100  |
| H | -9.12273500 | 1.33034300  | -0.26543900 |
| H | -8.16255600 | 3.79465000  | 1.28148200  |
| H | -7.45767500 | 5.26809100  | -1.33858200 |
| H | -5.42693700 | 6.05921600  | -0.13516400 |
| H | -3.47820300 | 6.06205900  | -0.07946400 |
| H | -1.48989600 | 5.22874700  | 1.13841200  |
| H | 0.93524100  | 6.04277500  | 0.21266200  |
| H | 2.89716400  | 5.10000900  | 1.34870900  |
| H | -5.84935200 | -2.49257000 | 1.06019500  |
| H | -5.17261500 | -1.15020300 | -1.64728900 |
| H | -5.85471400 | 0.03820700  | 1.12966800  |
| H | -5.17776500 | 1.39358500  | -1.57116800 |
| H | -5.86647900 | 2.56897200  | 1.21003000  |
| H | -5.22144700 | 3.94741600  | -1.48645900 |
| H | -3.65725600 | 3.88347100  | 1.17635600  |
| H | -7.36706700 | 0.11322400  | -1.57160500 |
| H | -7.38388100 | 2.65613900  | -1.48728500 |
| H | -7.37231700 | -2.43003100 | -1.63473100 |
| C | 0.19098500  | -0.27773900 | 3.54367500  |
| C | -0.75956000 | -1.24642600 | 3.59062800  |
| C | -0.05265500 | -2.49311600 | 3.56601700  |
| C | 1.26566200  | -2.17344600 | 3.50546600  |
| O | 1.42814200  | -0.82816700 | 3.49215400  |
| H | 0.15464100  | 0.80085100  | 3.54375300  |
| H | -1.82871600 | -1.09620300 | 3.63469400  |
| H | -0.47248300 | -3.48841900 | 3.58714400  |
| H | 2.17222900  | -2.75794300 | 3.47356200  |

Graphane-U5S

|   |             |             |             |
|---|-------------|-------------|-------------|
| C | -5.17375600 | 1.36270500  | -0.50497500 |
| C | -5.91202000 | 2.60428300  | 0.05014000  |
| C | -3.70499800 | 1.35310500  | -0.03254400 |
| C | -8.09796600 | 1.32179900  | 0.01250500  |
| C | -7.38593000 | 2.61261000  | -0.42805100 |
| C | -5.20380100 | 3.90433400  | -0.40146500 |
| C | -2.99744500 | 2.64517800  | -0.46622100 |
| C | -8.13100000 | 3.84307800  | 0.12514800  |
| C | -5.95426600 | 5.12582800  | 0.17161900  |
| C | -3.72899100 | 3.89934900  | 0.04956600  |
| C | -1.53032600 | 2.63465600  | -0.00218600 |
| C | -7.41997700 | 5.13999200  | -0.27791000 |
| H | -5.90010500 | 5.11602300  | 1.27657600  |
| C | -2.99975300 | 5.16217200  | -0.42705400 |
| C | -0.78561500 | 1.38505200  | -0.50211000 |
| C | -0.78847300 | 3.91885100  | -0.40725700 |
| H | -7.94127100 | 6.00930000  | 0.16433900  |
| C | -1.55218700 | 5.16596700  | 0.04652800  |
| H | -3.02109200 | 5.20059000  | -1.52519300 |
| C | 0.67840400  | 1.37141700  | -0.02819600 |
| C | 0.65619100  | 3.90088800  | 0.11540200  |
| H | -1.05932800 | 6.06854900  | -0.32663100 |
| C | 1.41093700  | 2.66816300  | -0.40955400 |
| C | 1.40697200  | 5.19372900  | -0.21559800 |
| C | 2.87657800  | 2.65017400  | 0.05894900  |
| C | 2.85510400  | 5.15867000  | 0.25549700  |
| H | 1.37747900  | 5.35502500  | -1.30458200 |
| C | 3.59693700  | 1.40800500  | -0.48569300 |
| C | 3.59578400  | 3.95331300  | -0.33857300 |
| H | 3.35552700  | 6.09759400  | -0.01180100 |
| C | 5.06559600  | 1.39144500  | -0.01255000 |
| C | 5.07213500  | 3.93171000  | 0.10715400  |
| C | 5.79042800  | 2.68333200  | -0.45992300 |
| C | 5.80870200  | 5.20633500  | -0.35830500 |
| C | 7.26670000  | 2.66410800  | 0.01048000  |
| H | 5.30473600  | 6.10471600  | 0.04615400  |
| C | 7.27675900  | 5.19470600  | 0.08357600  |
| C | 7.99722100  | 3.94540800  | -0.43628200 |
| C | 7.98776700  | 1.42325100  | -0.54421100 |
| H | 7.78754400  | 6.10467600  | -0.28259700 |
| C | 8.03193200  | -3.61935300 | -0.79800100 |
| C | 7.99909700  | -1.09785900 | -0.66659000 |
| C | 7.32735500  | -4.91888500 | -0.39145300 |
| C | 7.29235300  | -2.39263400 | -0.22937200 |
| C | 7.26989800  | 0.13521000  | -0.10476500 |
| C | 5.85537600  | -4.90411200 | -0.82014200 |
| H | 7.84310600  | -5.78554400 | -0.84517300 |
| C | 5.81379000  | -2.38310800 | -0.69308100 |
| C | 5.79585400  | 0.15044900  | -0.57794800 |

|   |             |             |             |
|---|-------------|-------------|-------------|
| C | 5.11213900  | -3.68414100 | -0.23413300 |
| H | 5.78566300  | -4.89179800 | -1.92421200 |
| C | 5.07844900  | -1.14412400 | -0.12890400 |
| C | 3.63056600  | -3.68340200 | -0.66268300 |
| C | 3.60887100  | -1.13398700 | -0.59963200 |
| C | 2.90934500  | -4.93637100 | -0.14864400 |
| C | 2.90381900  | -2.42329500 | -0.15613200 |
| C | 2.88078900  | 0.11270300  | -0.07150500 |
| C | 1.45564800  | -4.95194600 | -0.60253100 |
| H | 3.41462400  | -5.84886400 | -0.48887100 |
| C | 1.43408300  | -2.41893200 | -0.61200900 |
| C | 1.41787700  | 0.12484800  | -0.53899200 |
| C | 0.69636200  | -3.69386700 | -0.17168500 |
| H | 1.41401800  | -5.03494500 | -1.70001900 |
| C | 0.69053200  | -1.16373200 | -0.12544500 |
| C | -0.75235700 | -3.69035400 | -0.68351700 |
| C | -0.77362900 | -1.15587500 | -0.59852100 |
| C | -1.50135100 | -4.97116200 | -0.30600100 |
| C | -1.50495300 | -2.44480600 | -0.18777500 |
| C | -1.51317700 | 0.09413200  | -0.09600600 |
| C | -2.95081800 | -4.95256100 | -0.77364600 |
| H | -1.00168000 | -5.84450400 | -0.73542800 |
| C | -2.97306800 | -2.43795900 | -0.64789200 |
| C | -2.97788200 | 0.10399400  | -0.55673800 |
| C | -3.69137400 | -3.73045800 | -0.21521900 |
| H | -2.97491400 | -4.92022200 | -1.87192700 |
| C | -3.69205900 | -1.18637900 | -0.12320300 |
| C | -5.16709500 | -3.71978300 | -0.66344200 |
| C | -5.16171100 | -1.17658200 | -0.59314400 |
| C | -5.90496400 | -4.98445200 | -0.17384000 |
| C | -5.88735200 | -2.46038600 | -0.12403300 |
| C | -5.89307200 | 0.07217700  | -0.04657700 |
| C | -7.37099700 | -4.98237400 | -0.62267900 |
| H | -5.39929300 | -5.89108900 | -0.55725500 |
| C | -7.36159900 | -2.45033800 | -0.60121700 |
| C | -7.36460300 | 0.08169500  | -0.52809000 |
| C | -8.09425300 | -3.72269900 | -0.13266600 |
| H | -7.42760400 | -5.04466400 | -1.72642000 |
| C | -8.08579400 | -1.19947300 | -0.07376200 |
| H | 8.05983200  | 3.98114300  | -1.54027500 |
| H | 8.03837600  | 1.47341500  | -1.64781200 |
| H | 9.04849000  | -1.10552800 | -0.32014200 |
| H | 9.07781200  | -3.62884500 | -0.44096200 |
| H | -8.16321600 | -3.73600600 | 0.97143000  |
| H | -9.13116600 | -1.19010700 | -0.43240200 |
| H | -8.15772300 | 1.27763300  | 1.11593700  |
| H | -9.17219500 | 3.85199500  | -0.24552600 |
| H | 0.67808200  | -1.19442200 | 0.97911400  |
| H | 0.66704100  | 1.31028500  | 1.07537100  |
| H | -1.51482300 | 0.05025300  | 1.00884200  |

|   |             |             |             |
|---|-------------|-------------|-------------|
| H | 1.42422600  | 0.16866800  | -1.64495900 |
| H | -0.76665500 | -1.11601600 | -1.70421800 |
| H | -0.77621600 | 1.42855000  | -1.60734600 |
| H | 1.43581300  | -2.40077600 | -1.71886400 |
| H | 2.90398500  | -2.45041900 | 0.94666500  |
| H | 3.58840900  | -1.09481100 | -1.70880800 |
| H | 2.86769100  | 0.05936400  | 1.03141800  |
| H | 3.57951300  | 1.46511000  | -1.59403200 |
| H | 2.86887700  | 2.58679700  | 1.16153900  |
| H | 1.42384800  | 2.73433200  | -1.51416900 |
| H | 0.61000800  | 3.81302800  | 1.21630000  |
| H | -0.74178500 | 3.93801200  | -1.51104500 |
| H | -1.54046100 | 2.59454600  | 1.10440500  |
| H | 0.66021200  | -3.68085700 | 0.93314200  |
| H | -0.71457100 | -3.63745400 | -1.78678900 |
| H | -1.50872200 | -2.48131500 | 0.91749000  |
| H | -2.97479400 | -2.39922400 | -1.75101400 |
| H | -3.67205300 | -1.22589600 | 0.98659200  |
| H | -2.97699000 | 0.14351400  | -1.65963300 |
| H | -3.68665800 | 1.31310000  | 1.07694700  |
| H | -2.99353900 | 2.68257400  | -1.56927700 |
| H | 5.08303600  | 1.33951600  | 1.10203900  |
| H | 5.77377200  | 2.73651800  | -1.57389000 |
| H | 5.11026800  | 3.88972000  | 1.22209000  |
| H | 3.55645500  | 4.03209200  | -1.44358500 |
| H | 5.74864700  | 5.29404800  | -1.45957400 |
| H | 7.33871900  | 5.23387500  | 1.18804200  |
| H | 9.04061300  | 3.93162400  | -0.07205200 |
| H | 7.28404700  | 2.61894000  | 1.12627800  |
| H | 9.03600200  | 1.40831200  | -0.19442400 |
| H | 5.78054700  | 0.20160600  | -1.69215600 |
| H | 7.28706500  | 0.08124800  | 1.01089200  |
| H | 8.04567200  | -1.04292000 | -1.77010900 |
| H | 7.31485300  | -2.45281500 | 0.88570900  |
| H | 5.79093300  | -2.33745300 | -1.80713800 |
| H | 5.09714200  | -1.19471800 | 0.98598100  |
| H | 8.08639400  | -3.55190900 | -1.90091000 |
| H | 7.39961100  | -5.06027800 | 0.70401400  |
| H | 5.36261400  | -5.84014400 | -0.49492900 |
| H | 5.16258500  | -3.74174100 | 0.87987300  |
| H | 3.57734600  | -3.67979000 | -1.77009400 |
| H | -3.65317400 | -3.77831100 | 0.89200600  |
| H | -5.20272300 | -3.70084900 | -1.77926900 |
| H | -9.13556400 | -3.71659400 | -0.50310200 |
| H | -7.88341900 | -5.88462500 | -0.24008800 |
| H | -5.84965600 | -5.04890900 | 0.92917100  |
| H | -3.44978800 | -5.88321800 | -0.47623500 |
| H | -1.46854300 | -5.09333800 | 0.78864900  |
| H | 0.96848200  | -5.84548600 | -0.20061700 |
| H | 2.94492100  | -4.94770300 | 0.95007300  |

|   |             |             |             |
|---|-------------|-------------|-------------|
| H | -8.14563900 | -1.23130400 | 1.03008500  |
| H | -9.14331500 | 1.32692800  | -0.34627200 |
| H | -8.20005300 | 3.78089200  | 1.22757700  |
| H | -7.47680000 | 5.27626000  | -1.37495200 |
| H | -5.45716300 | 6.06117700  | -0.14888700 |
| H | -3.50868900 | 6.06675900  | -0.07187600 |
| H | -1.52467500 | 5.22107000  | 1.14622200  |
| H | 0.90568000  | 6.05095600  | 0.24363600  |
| H | 2.87685300  | 5.09255100  | 1.35244300  |
| H | -5.87555900 | -2.49211100 | 0.99074100  |
| H | -5.18044600 | -1.14252800 | -1.70861100 |
| H | -5.88421200 | 0.03363400  | 1.06822300  |
| H | -5.19104200 | 1.40533600  | -1.62014600 |
| H | -5.90074400 | 2.55994500  | 1.16452300  |
| H | -5.23802500 | 3.96074400  | -1.51604300 |
| H | -3.69303500 | 3.87479500  | 1.15738600  |
| H | -7.37539400 | 0.11987800  | -1.64443700 |
| H | -7.39765000 | 2.66493100  | -1.54362000 |
| H | -7.37386300 | -2.42679800 | -1.71775600 |
| C | 1.24625900  | -0.27673100 | 3.65932700  |
| C | -0.08870600 | -0.01988700 | 3.54296700  |
| C | -0.87214500 | -1.21371000 | 3.49149200  |
| C | -0.10891300 | -2.34161800 | 3.57016900  |
| S | 1.56644400  | -1.96853700 | 3.71102600  |
| H | 2.06065500  | 0.43255200  | 3.71710400  |
| H | -0.50213800 | 0.98105300  | 3.48862900  |
| H | -1.95204300 | -1.22876500 | 3.39436200  |
| H | -0.43611000 | -3.37247500 | 3.55221900  |

#### Graphane-CH<sub>4</sub>

|   |             |             |             |
|---|-------------|-------------|-------------|
| C | 5.11756900  | -1.26989800 | -0.35189100 |
| C | 5.85145000  | -2.53456800 | 0.15469000  |
| C | 3.65106600  | -1.27123400 | 0.12765700  |
| C | 8.04328200  | -1.26150500 | 0.15901200  |
| C | 7.32439200  | -2.53219700 | -0.32653700 |
| C | 5.13625100  | -3.81337700 | -0.34416400 |
| C | 2.93540400  | -2.54184100 | -0.35388200 |
| C | 8.06443700  | -3.78555600 | 0.18000400  |
| C | 5.88165600  | -5.05900700 | 0.18176700  |
| C | 3.66203400  | -3.81925100 | 0.10887800  |
| C | 1.47004400  | -2.54343800 | 0.11596800  |
| C | 7.34681600  | -5.06336800 | -0.26975700 |
| H | 5.82877800  | -5.09021100 | 1.28642100  |
| C | 2.92597100  | -5.05762200 | -0.41899300 |
| C | 0.72954400  | -1.27062800 | -0.32820000 |
| C | 0.72047200  | -3.80545200 | -0.34219800 |
| H | 7.86446700  | -5.95082700 | 0.13946800  |
| C | 1.47895200  | -5.07463300 | 0.05616300  |
| H | 2.94554200  | -5.04985500 | -1.51782300 |
| C | -0.73179900 | -1.26970800 | 0.15374800  |



|   |             |             |             |
|---|-------------|-------------|-------------|
| C | -0.72291400 | -3.80400800 | 0.18438000  |
| H | 0.98142800  | -5.95780200 | -0.35532800 |
| C | -1.47365500 | -2.54499500 | -0.28025900 |
| C | -1.48166400 | -5.07534800 | -0.20647000 |
| C | -2.93659300 | -2.54120500 | 0.19729600  |
| C | -2.92752100 | -5.05673400 | 0.27226600  |
| H | -1.45735400 | -5.18282500 | -1.30223100 |
| C | -3.65514600 | -1.27198500 | -0.28366500 |
| C | -3.66560700 | -3.82021500 | -0.25732400 |
| H | -3.43359300 | -5.97878200 | -0.03941200 |
| C | -5.11845400 | -1.26968900 | 0.20566300  |
| C | -5.13780000 | -3.81303800 | 0.20233500  |
| C | -5.85531500 | -2.53495700 | -0.29508900 |
| C | -5.88573500 | -5.05939400 | -0.31830700 |
| C | -7.32577200 | -2.53191000 | 0.19365800  |
| H | -5.38209600 | -5.97923000 | 0.03515800  |
| C | -7.34878300 | -5.06309800 | 0.14002700  |
| C | -8.06842700 | -3.78574600 | -0.30783700 |
| C | -8.04697300 | -1.26158000 | -0.28934700 |
| H | -7.86839300 | -5.95098500 | -0.26577500 |
| C | -8.06844000 | 3.78591500  | -0.30789800 |
| C | -8.04697900 | 1.26175000  | -0.28936300 |
| C | -7.34880100 | 5.06327600  | 0.13994500  |
| C | -7.32578200 | 2.53209000  | 0.19362100  |
| C | -7.31605500 | 0.00008900  | 0.20221900  |
| C | -5.88575500 | 5.05956800  | -0.31839400 |
| H | -7.86841700 | 5.95115700  | -0.26586400 |
| C | -5.85532300 | 2.53513400  | -0.29511800 |
| C | -5.84865500 | 0.00009100  | -0.29164400 |
| C | -5.13781700 | 3.81322900  | 0.20228400  |
| H | -5.83803400 | 5.09230400  | -1.42324400 |
| C | -5.11846200 | 1.26987600  | 0.20566100  |
| C | -3.66561200 | 3.82040300  | -0.25734400 |
| C | -3.65514900 | 1.27217600  | -0.28364700 |
| C | -2.92754900 | 5.05694100  | 0.27223900  |
| C | -2.93661300 | 2.54140000  | 0.19732400  |
| C | -2.92823800 | 0.00009100  | 0.18200800  |
| C | -1.48165600 | 5.07553900  | -0.20639300 |
| H | -3.43359600 | 5.97897800  | -0.03951500 |
| C | -1.47364800 | 2.54519200  | -0.28016000 |
| C | -1.46954200 | 0.00011000  | -0.29901400 |
| C | -0.72295500 | 3.80420000  | 0.18455700  |
| H | -1.45725500 | 5.18299300  | -1.30215300 |
| C | -0.73181600 | 1.26989100  | 0.15388500  |
| C | 0.72049400  | 3.80566600  | -0.34183200 |
| C | 0.72954100  | 1.27084800  | -0.32800800 |
| C | 1.47890800  | 5.07480700  | 0.05678100  |
| C | 1.47002600  | 2.54361600  | 0.11630100  |
| C | 1.46583900  | 0.00007000  | 0.12443700  |
| C | 2.92598300  | 5.05788900  | -0.41820600 |

|   |             |             |             |
|---|-------------|-------------|-------------|
| H | 0.98141700  | 5.95802100  | -0.35465700 |
| C | 2.93540200  | 2.54208000  | -0.35349500 |
| C | 2.92779600  | 0.00011900  | -0.34582700 |
| C | 3.66202400  | 3.81942400  | 0.10947300  |
| H | 2.94568400  | 5.05036900  | -1.51703600 |
| C | 3.65106000  | 1.27139900  | 0.12786100  |
| C | 5.13624200  | 3.81361700  | -0.34358400 |
| C | 5.11756100  | 1.27013900  | -0.35169400 |
| C | 5.88166100  | 5.05916300  | 0.18251700  |
| C | 5.85145000  | 2.53473500  | 0.15506800  |
| C | 5.84485800  | 0.00008200  | 0.14926100  |
| C | 7.34680400  | 5.06359900  | -0.26906200 |
| H | 5.37965000  | 5.97954300  | -0.17185300 |
| C | 7.32438200  | 2.53242900  | -0.32619300 |
| C | 7.31494500  | 0.00012000  | -0.33656900 |
| C | 8.06445300  | 3.78572200  | 0.18046500  |
| H | 7.40180800  | 5.15969800  | -1.37044300 |
| C | 8.04327600  | 1.26167500  | 0.15919500  |
| H | -8.14423300 | -3.76582500 | -1.41140100 |
| H | -8.11314600 | -1.25747200 | -1.39327600 |
| H | -9.09022300 | 1.25875900  | 0.07544200  |
| H | -9.10735200 | 3.78540100  | 0.06916300  |
| H | 8.13503300  | 3.76434100  | 1.28435200  |
| H | 9.08824000  | 1.25902500  | -0.20066100 |
| H | 8.10424200  | -1.25678900 | 1.26325200  |
| H | 9.10515300  | -3.78561000 | -0.19205200 |
| H | -0.71271400 | 1.26105000  | 1.25929200  |
| H | -0.71255100 | -1.26082700 | 1.25913200  |
| H | 1.47634900  | -0.00003300 | 1.23031700  |
| H | -1.48665100 | 0.00017000  | -1.40533900 |
| H | 0.71349300  | 1.26859600  | -1.43387100 |
| H | 0.71349900  | -1.26823200 | -1.43406300 |
| H | -1.49264100 | 2.56063900  | -1.38648400 |
| H | -2.92241400 | 2.53112700  | 1.30101700  |
| H | -3.64935500 | 1.27811700  | -1.39350400 |
| H | -2.90890900 | 0.00007100  | 1.28591700  |
| H | -3.64936500 | -1.27792500 | -1.39352100 |
| H | -2.92235100 | -2.53091200 | 1.30099000  |
| H | -1.49271200 | -2.56043400 | -1.38658300 |
| H | -0.67350600 | -3.76875800 | 1.28782700  |
| H | 0.67175300  | -3.77661900 | -1.44573200 |
| H | 1.48422900  | -2.55116200 | 1.22294500  |
| H | -0.67368700 | 3.76896200  | 1.28800700  |
| H | 0.67192500  | 3.77694700  | -1.44537600 |
| H | 1.48414700  | 2.55126900  | 1.22327900  |
| H | 2.92736500  | 2.53566600  | -1.45717500 |
| H | 3.63770000  | 1.27422200  | 1.23780700  |
| H | 2.91863800  | 0.00021400  | -1.44936400 |
| H | 3.63770300  | -1.27422500 | 1.23760200  |
| H | 2.92733100  | -2.53526200 | -1.45756000 |

|   |             |             |             |
|---|-------------|-------------|-------------|
| H | -5.12351600 | -1.27118600 | 1.32174800  |
| H | -5.85203100 | -2.53413400 | -1.41042700 |
| H | -5.16529400 | -3.82599600 | 1.31844200  |
| H | -3.63608600 | -3.84563400 | -1.36519000 |
| H | -5.83801200 | -5.09216200 | -1.42315600 |
| H | -7.39871700 | -5.15776300 | 1.24177100  |
| H | -9.10733700 | -3.78522800 | 0.06923200  |
| H | -7.32946000 | -2.54261400 | 1.31047000  |
| H | -9.09021800 | -1.25858700 | 0.07545700  |
| H | -5.84900700 | 0.00008700  | -1.40718500 |
| H | -7.31759200 | 0.00009500  | 1.31930300  |
| H | -8.11315400 | 1.25762300  | -1.39329200 |
| H | -7.32947400 | 2.54281100  | 1.31043400  |
| H | -5.85203100 | 2.53428600  | -1.41045600 |
| H | -5.12353800 | 1.27138000  | 1.32174600  |
| H | -8.14423900 | 3.76597300  | -1.41146300 |
| H | -7.39873000 | 5.15795400  | 1.24168900  |
| H | -5.38212000 | 5.97941800  | 0.03504100  |
| H | -5.16532700 | 3.82621000  | 1.31839200  |
| H | -3.63606200 | 3.84579800  | -1.36520900 |
| H | 3.62755600  | 3.84046200  | 1.21732300  |
| H | 5.16878400  | 3.82848400  | -1.45952900 |
| H | 9.10514000  | 3.78583100  | -0.19167600 |
| H | 7.86446600  | 5.95099700  | 0.14028300  |
| H | 5.82882600  | 5.09019000  | 1.28717800  |
| H | 3.43118700  | 5.97880300  | -0.10181700 |
| H | 1.45200400  | 5.17725700  | 1.15298200  |
| H | -0.98303600 | 5.95675100  | 0.20798100  |
| H | -2.94412100 | 5.04565100  | 1.37109300  |
| H | 8.10422200  | 1.25681000  | 1.26343500  |
| H | 9.08824200  | -1.25880000 | -0.20085800 |
| H | 8.13492500  | -3.76432900 | 1.28390000  |
| H | 7.40186300  | -5.15929100 | -1.37115000 |
| H | 5.37965400  | -5.97932600 | -0.17277100 |
| H | 3.43122800  | -5.97859500 | -0.10286400 |
| H | 1.45219000  | -5.17722800 | 1.15235500  |
| H | -0.98302100 | -5.95655700 | 0.20787900  |
| H | -2.94402100 | -5.04539300 | 1.37112100  |
| H | 5.84249600  | 2.53193900  | 1.27037600  |
| H | 5.12980600  | 1.27270900  | -1.46773900 |
| H | 5.83914900  | -0.00000300 | 1.26481100  |
| H | 5.12981800  | -1.27230500 | -1.46793600 |
| H | 5.84247500  | -2.53194500 | 1.27000000  |
| H | 5.16880900  | -3.82808600 | -1.46010900 |
| H | 3.62755500  | -3.84047400 | 1.21672400  |
| H | 7.32258100  | 0.00019900  | -1.45361200 |
| H | 7.33377700  | -2.54397300 | -1.44329600 |
| H | 7.33374200  | 2.54432600  | -1.44295100 |
| H | 0.11132000  | -0.00426700 | 4.95310900  |
| C | 0.07002600  | -0.00512500 | 3.86248500  |

|   |             |             |            |
|---|-------------|-------------|------------|
| H | 0.57373800  | 0.88399400  | 3.47648600 |
| H | -0.97216500 | -0.00173800 | 3.53530500 |
| H | 0.56734200  | -0.89855500 | 3.47813000 |

Graphane-NH<sub>3</sub>

|   |             |             |             |
|---|-------------|-------------|-------------|
| C | -5.11928900 | 1.26998300  | -0.34516100 |
| C | -5.85170300 | 2.53481000  | 0.16319200  |
| C | -3.65180000 | 1.27164300  | 0.13043700  |
| C | -8.04335700 | 1.26167600  | 0.17360100  |
| C | -7.32593800 | 2.53233300  | -0.31407300 |
| C | -5.13792400 | 3.81356500  | -0.33787500 |
| C | -2.93732100 | 2.54201900  | -0.35344200 |
| C | -8.06446100 | 3.78566900  | 0.19457700  |
| C | -5.88174000 | 5.05911300  | 0.19038400  |
| C | -3.66257100 | 3.81979600  | 0.11090100  |
| C | -1.47067800 | 2.54374800  | 0.11202000  |
| C | -7.34814000 | 5.06350800  | -0.25705300 |
| H | -5.82595500 | 5.09016500  | 1.29498400  |
| C | -2.92778600 | 5.05758100  | -0.41999700 |
| C | -0.73092800 | 1.27105200  | -0.33375900 |
| C | -0.72173300 | 3.80582700  | -0.34702000 |
| H | -7.86461100 | 5.95089100  | 0.15401500  |
| C | -1.47974400 | 5.07513400  | 0.05186700  |
| H | -2.95010300 | 5.04889400  | -1.51874300 |
| C | 0.73083900  | 1.27016000  | 0.14671800  |
| C | 0.72201700  | 3.80468000  | 0.17843900  |
| H | -0.98308100 | 5.95773200  | -0.36169400 |
| C | 1.47327400  | 2.54557800  | -0.28501400 |
| C | 1.48102800  | 5.07538700  | -0.21376200 |
| C | 2.93515100  | 2.54175100  | 0.19572500  |
| C | 2.92597500  | 5.05774600  | 0.26766000  |
| H | 1.45825500  | 5.18067800  | -1.30973100 |
| C | 3.65531900  | 1.27240300  | -0.28256600 |
| C | 3.66562700  | 3.82049700  | -0.25798000 |
| H | 3.43247200  | 5.97906600  | -0.04514800 |
| C | 5.11672800  | 1.26987000  | 0.21147400  |
| C | 5.13598900  | 3.81339400  | 0.20693700  |
| C | 5.85536500  | 2.53503800  | -0.28706400 |
| C | 5.88589800  | 5.05938500  | -0.31160900 |
| C | 7.32381100  | 2.53211900  | 0.20771500  |
| H | 5.38104800  | 5.97957800  | 0.03931000  |
| C | 7.34696800  | 5.06327400  | 0.15296800  |
| C | 8.06852700  | 3.78574400  | -0.29111600 |
| C | 8.04695100  | 1.26170500  | -0.27201600 |
| H | 7.86833400  | 5.95101500  | -0.25100000 |
| C | 8.06853900  | -3.78544800 | -0.29396200 |
| C | 8.04694500  | -1.26142600 | -0.27297900 |
| C | 7.34708600  | -5.06334700 | 0.14924400  |
| C | 7.32388700  | -2.53219900 | 0.20591700  |
| C | 7.31406300  | -0.00004300 | 0.21624900  |

|   |             |             |             |
|---|-------------|-------------|-------------|
| C | 5.88588600  | -5.05909300 | -0.31492100 |
| H | 7.86834200  | -5.95074100 | -0.25563400 |
| C | 5.85535600  | -2.53480200 | -0.28861900 |
| C | 5.84861200  | 0.00011400  | -0.28342700 |
| C | 5.13614000  | -3.81347600 | 0.20477900  |
| H | 5.84259000  | -5.09043700 | -1.41998200 |
| C | 5.11677200  | -1.26994200 | 0.21076600  |
| C | 3.66559700  | -3.82037700 | -0.25954300 |
| C | 3.65530800  | -1.27225400 | -0.28311200 |
| C | 2.92616900  | -5.05778100 | 0.26606800  |
| C | 2.93524800  | -2.54179000 | 0.19482900  |
| C | 2.92680900  | -0.00001800 | 0.18037900  |
| C | 1.48103000  | -5.07529400 | -0.21477600 |
| H | 3.43255500  | -5.97901900 | -0.04716600 |
| C | 1.47322000  | -2.54551800 | -0.28548900 |
| C | 1.46930800  | 0.00002400  | -0.30420500 |
| C | 0.72217700  | -3.80470100 | 0.17812400  |
| H | 1.45783200  | -5.18018200 | -1.31077400 |
| C | 0.73089800  | -1.27016300 | 0.14664800  |
| C | -0.72186100 | -3.80586200 | -0.34651300 |
| C | -0.73096400 | -1.27105500 | -0.33353100 |
| C | -1.47972400 | -5.07502200 | 0.05313700  |
| C | -1.47061800 | -2.54368300 | 0.11259200  |
| C | -1.46614700 | 0.00003700  | 0.11990000  |
| C | -2.92790700 | -5.05765000 | -0.41829400 |
| H | -0.98319800 | -5.95781600 | -0.36015900 |
| C | -2.93737400 | -2.54206900 | -0.35255300 |
| C | -2.92967400 | -0.00002500 | -0.34450200 |
| C | -3.66253200 | -3.81968100 | 0.11241100  |
| H | -2.95054800 | -5.04931900 | -1.51703500 |
| C | -3.65178300 | -1.27151500 | 0.13095200  |
| C | -5.13800400 | -3.81364500 | -0.33595200 |
| C | -5.11930800 | -1.27005800 | -0.34452700 |
| C | -5.88170200 | -5.05886800 | 0.19325600  |
| C | -5.85168400 | -2.53461900 | 0.16454200  |
| C | -5.84516800 | 0.00009400  | 0.15823100  |
| C | -7.34817500 | -5.06359000 | -0.25393100 |
| H | -5.38084400 | -5.97962000 | -0.16181200 |
| C | -7.32596800 | -2.53240600 | -0.31258000 |
| C | -7.31652800 | -0.00004500 | -0.32374000 |
| C | -8.06446900 | -3.78543600 | 0.19685300  |
| H | -7.40674900 | -5.16082200 | -1.35501200 |
| C | -8.04332700 | -1.26145900 | 0.17443300  |
| H | 8.14961300  | 3.76536800  | -1.39428800 |
| H | 8.11855400  | 1.25762400  | -1.37560500 |
| H | 9.08857400  | -1.25867600 | 0.09669700  |
| H | 9.10581900  | -3.78542400 | 0.08780300  |
| H | -8.13214200 | -3.76349200 | 1.30097300  |
| H | -9.08939500 | -1.25891100 | -0.18237100 |
| H | -8.10156400 | 1.25716200  | 1.27806800  |

|   |             |             |             |
|---|-------------|-------------|-------------|
| H | -9.10628100 | 3.78578800  | -0.17451600 |
| H | 0.70995900  | -1.26033900 | 1.25220700  |
| H | 0.70967000  | 1.26000800  | 1.25227200  |
| H | -1.47035200 | 0.00025700  | 1.22630900  |
| H | 1.48906300  | 0.00004300  | -1.41031100 |
| H | -0.71671900 | -1.26904100 | -1.43924700 |
| H | -0.71649000 | 1.26881600  | -1.43946800 |
| H | 1.49381400  | -2.56058200 | -1.39168900 |
| H | 2.91896900  | -2.53317800 | 1.29856100  |
| H | 3.65262700  | -1.27726900 | -1.39288900 |
| H | 2.90551800  | -0.00025700 | 1.28476000  |
| H | 3.65276700  | 1.27782900  | -1.39234200 |
| H | 2.91858300  | 2.53269500  | 1.29944800  |
| H | 1.49423000  | 2.56074800  | -1.39120900 |
| H | 0.67325700  | 3.77102500  | 1.28203200  |
| H | -0.67426700 | 3.77633600  | -1.45052500 |
| H | -1.48256300 | 2.55186000  | 1.21949800  |
| H | 0.67406100  | -3.77125000 | 1.28175300  |
| H | -0.67503100 | -3.77664400 | -1.45005400 |
| H | -1.48224000 | -2.55165800 | 1.22007500  |
| H | -2.93251800 | -2.53552200 | -1.45618300 |
| H | -3.63552800 | -1.27449700 | 1.24090200  |
| H | -2.92356700 | -0.00024200 | -1.44798800 |
| H | -3.63564800 | 1.27503400  | 1.24038900  |
| H | -2.93225600 | 2.53504100  | -1.45706900 |
| H | 5.11859800  | 1.27156200  | 1.32768300  |
| H | 5.85675600  | 2.53372100  | -1.40240900 |
| H | 5.15959700  | 3.82709100  | 1.32325000  |
| H | 3.63976600  | 3.84426300  | -1.36593600 |
| H | 5.84290800  | 5.09156200  | -1.41665800 |
| H | 7.39227800  | 5.15864200  | 1.25491100  |
| H | 9.10575600  | 3.78545000  | 0.09078300  |
| H | 7.32299600  | 2.54317400  | 1.32460000  |
| H | 9.08854400  | 1.25872300  | 0.09775900  |
| H | 5.85354100  | 0.00042900  | -1.39896800 |
| H | 7.31126700  | -0.00046600 | 1.33340400  |
| H | 8.11844200  | -1.25655900 | -1.37657200 |
| H | 7.32325600  | -2.54408500 | 1.32279600  |
| H | 5.85655900  | -2.53284600 | -1.40396400 |
| H | 5.11875800  | -1.27231200 | 1.32697600  |
| H | 8.14948000  | -3.76423700 | -1.39712800 |
| H | 7.39271300  | -5.15965800 | 1.25109000  |
| H | 5.38110900  | -5.97954000 | 0.03543900  |
| H | 5.16019900  | -3.82794000 | 1.32107500  |
| H | 3.63927400  | -3.84383700 | -1.36749300 |
| H | -3.62441200 | -3.84109800 | 1.22009200  |
| H | -5.17436500 | -3.82911000 | -1.45179300 |
| H | -9.10628000 | -3.78578900 | -0.17228000 |
| H | -7.86456500 | -5.95066800 | 0.15790900  |
| H | -5.82573200 | -5.08919100 | 1.29786600  |

|   |             |             |             |
|---|-------------|-------------|-------------|
| H | -3.43226100 | -5.97866400 | -0.10118100 |
| H | -1.45012000 | -5.17831200 | 1.14915000  |
| H | 0.98179100  | -5.95716900 | 0.19716400  |
| H | 2.94109700  | -5.04928500 | 1.36491100  |
| H | -8.10138900 | -1.25629300 | 1.27890500  |
| H | -9.08938000 | 1.25893000  | -0.18333900 |
| H | -8.13209200 | 3.76443200  | 1.29871400  |
| H | -7.40652100 | 5.15989500  | -1.35822000 |
| H | -5.38085300 | 5.97964700  | -0.16520600 |
| H | -3.43223200 | 5.97869700  | -0.10333200 |
| H | -1.45046100 | 5.17893900  | 1.14784000  |
| H | 0.98160500  | 5.95710200  | 0.19830600  |
| H | 2.94046500  | 5.04898100  | 1.36650700  |
| H | -5.83980400 | -2.53171800 | 1.27990600  |
| H | -5.13492300 | -1.27291600 | -1.46058100 |
| H | -5.83681900 | 0.00037700  | 1.27384300  |
| H | -5.13482500 | 1.27225500  | -1.46121500 |
| H | -5.83993400 | 2.53247800  | 1.27855900  |
| H | -5.17397200 | 3.82836200  | -1.45373400 |
| H | -3.62477100 | 3.84157600  | 1.21858700  |
| H | -7.32731300 | -0.00040900 | -1.44077100 |
| H | -7.33852600 | 2.54412500  | -1.43081100 |
| H | -7.33866600 | -2.54483800 | -1.42931000 |
| H | 0.90954200  | -0.00036600 | 3.35537500  |
| N | -0.02203500 | -0.00138600 | 3.76643600  |
| H | -0.49864300 | -0.81628700 | 3.38484200  |
| H | -0.50097600 | 0.81157800  | 3.38364400  |

#### Graphane-CO<sub>2</sub>

|   |             |            |             |
|---|-------------|------------|-------------|
| C | -5.04443400 | 1.32825700 | -0.45257400 |
| C | -5.77808900 | 2.58549100 | 0.07246600  |
| C | -3.58147000 | 1.31700100 | 0.03743800  |
| C | -7.97338000 | 1.31856200 | 0.04003800  |
| C | -7.24818700 | 2.59614400 | -0.41722400 |
| C | -5.05671400 | 3.87117400 | -0.39908300 |
| C | -2.85931300 | 2.59345100 | -0.41876500 |
| C | -7.98771100 | 3.84175300 | 0.10878400  |
| C | -5.80163400 | 5.10889500 | 0.14594500  |
| C | -3.58499700 | 3.86488900 | 0.06199200  |
| C | -1.39679200 | 2.58388700 | 0.05990500  |
| C | -7.26434300 | 5.12578000 | -0.31324200 |
| H | -5.75473400 | 5.11904100 | 1.25131800  |
| C | -2.84292900 | 5.11003700 | -0.44109000 |
| C | -0.65554700 | 1.31674600 | -0.39910300 |
| C | -0.64095400 | 3.85064200 | -0.37488000 |
| H | -7.78179000 | 6.00680000 | 0.10992200  |
| C | -1.39801000 | 5.11515500 | 0.04062100  |
| H | -2.85763700 | 5.12147300 | -1.53997900 |
| C | 0.80052800  | 1.30398700 | 0.09876800  |
| C | 0.80012000  | 3.83841300 | 0.15825800  |

|   |             |             |             |
|---|-------------|-------------|-------------|
| H | -0.89640500 | 6.00369600  | -0.35387500 |
| C | 1.55011100  | 2.58185700  | -0.31437800 |
| C | 1.56533400  | 5.11075100  | -0.21692300 |
| C | 3.00941500  | 2.56844900  | 0.17410900  |
| C | 3.00792200  | 5.08343400  | 0.27112100  |
| H | 1.54825000  | 5.22754000  | -1.31183400 |
| C | 3.72792900  | 1.30112200  | -0.31214100 |
| C | 3.74597900  | 3.84910200  | -0.26360100 |
| H | 3.51905000  | 6.00639400  | -0.02938000 |
| C | 5.18661300  | 1.29005500  | 0.19058400  |
| C | 5.21438300  | 3.83331900  | 0.20773000  |
| C | 5.93201200  | 2.55680300  | -0.29351600 |
| C | 5.97053100  | 5.08120200  | -0.29719300 |
| C | 7.39800800  | 2.54532500  | 0.20834000  |
| H | 5.46679400  | 5.99998300  | 0.05887200  |
| C | 7.42962500  | 5.07680600  | 0.17361800  |
| C | 8.14901400  | 3.80040200  | -0.27738500 |
| C | 8.11949000  | 1.27615600  | -0.27724700 |
| H | 7.95549800  | 5.96591700  | -0.22131800 |
| C | 8.12515100  | -3.77126400 | -0.33015900 |
| C | 8.11150700  | -1.24719600 | -0.29486500 |
| C | 7.39688400  | -5.04914900 | 0.10199400  |
| C | 7.38141000  | -2.51845000 | 0.17219500  |
| C | 7.37991300  | 0.01339300  | 0.19839200  |
| C | 5.93868300  | -5.03781800 | -0.37145300 |
| H | 7.91788500  | -5.93606600 | -0.30412300 |
| C | 5.91603800  | -2.51341800 | -0.33150400 |
| C | 5.91739200  | 0.02173300  | -0.30959900 |
| C | 5.18912500  | -3.79255800 | 0.14942800  |
| H | 5.90234500  | -5.06339300 | -1.47690300 |
| C | 5.17820600  | -1.24937400 | 0.17083200  |
| C | 3.72210000  | -3.79171500 | -0.32661000 |
| C | 3.72012600  | -1.24314700 | -0.33370100 |
| C | 2.97333300  | -5.02908600 | 0.18575700  |
| C | 2.99213300  | -2.51376400 | 0.12913400  |
| C | 2.99282900  | 0.02733800  | 0.13584100  |
| C | 1.53410600  | -5.04009100 | -0.31291000 |
| H | 3.48062300  | -5.95091700 | -0.12461600 |
| C | 1.53550400  | -2.50875400 | -0.36702500 |
| C | 1.53901100  | 0.03651400  | -0.35961900 |
| C | 0.77338200  | -3.76910600 | 0.07497700  |
| H | 1.52501800  | -5.14110000 | -1.40959800 |
| C | 0.79202100  | -1.23575300 | 0.07085200  |
| C | -0.65965100 | -3.76091400 | -0.47970100 |
| C | -0.66202700 | -1.22672400 | -0.43334900 |
| C | -1.42811900 | -5.03333000 | -0.11192900 |
| C | -1.41315600 | -2.50302200 | -0.01722100 |
| C | -1.40007700 | 0.04095500  | 0.02358000  |
| C | -2.86805900 | -5.00396400 | -0.60749900 |
| H | -0.92713700 | -5.91147700 | -0.53001300 |



|   |             |             |             |
|---|-------------|-------------|-------------|
| C | -2.87238600 | -2.48962700 | -0.50397600 |
| C | -2.85884400 | 0.05243400  | -0.45566000 |
| C | -3.60712600 | -3.77215000 | -0.06905500 |
| H | -2.87232900 | -4.97752200 | -1.70618900 |
| C | -3.58882500 | -1.22481800 | -0.00888200 |
| C | -5.07675400 | -3.75447000 | -0.53591400 |
| C | -5.05161800 | -1.21125400 | -0.49856700 |
| C | -5.83004900 | -5.00749800 | -0.03980300 |
| C | -5.79275100 | -2.48278400 | -0.02035000 |
| C | -5.77875200 | 0.05154700  | 0.02050500  |
| C | -7.29116200 | -4.99917500 | -0.50418700 |
| H | -5.32744800 | -5.92249600 | -0.40716800 |
| C | -7.26171700 | -2.46739200 | -0.51326800 |
| C | -7.24540700 | 0.06468100  | -0.47523400 |
| C | -8.00917200 | -3.72802700 | -0.03660200 |
| H | -7.33680700 | -5.07418800 | -1.60762600 |
| C | -7.98072800 | -1.20409300 | -0.00905700 |
| H | 8.23441200  | 3.78835800  | -1.38036100 |
| H | 8.19586800  | 1.27979500  | -1.38051500 |
| H | 9.15111300  | -1.25022800 | 0.08016100  |
| H | 9.16019000  | -3.77661900 | 0.05737000  |
| H | -8.08916000 | -3.72728200 | 1.06685100  |
| H | -9.02300900 | -1.19156200 | -0.37638900 |
| H | -8.04037000 | 1.29310300  | 1.14372000  |
| H | -9.02647300 | 3.85156600  | -0.26849600 |
| H | 0.75598100  | -1.24100900 | 1.17588100  |
| H | 0.76957900  | 1.28419900  | 1.20455300  |
| H | -1.42319300 | 0.03250200  | 1.12949100  |
| H | 1.56724700  | 0.04890600  | -1.46557100 |
| H | -0.63012500 | -1.20904400 | -1.53854800 |
| H | -0.62740300 | 1.33209100  | -1.50438600 |
| H | 1.56925300  | -2.51274300 | -1.47314900 |
| H | 2.96408200  | -2.51218100 | 1.23237800  |
| H | 3.72599900  | -1.23961000 | -1.44359100 |
| H | 2.96287800  | 0.01754700  | 1.23891600  |
| H | 3.73232700  | 1.31728800  | -1.42188300 |
| H | 2.98678900  | 2.54874800  | 1.27746300  |
| H | 1.57748800  | 2.60897700  | -1.42023500 |
| H | 0.74543900  | 3.79314000  | 1.26100400  |
| H | -0.58719900 | 3.83918200  | -1.47849800 |
| H | -1.41842500 | 2.57358400  | 1.16646500  |
| H | 0.70234500  | -3.74110000 | 1.17736700  |
| H | -0.59060700 | -3.71768500 | -1.58170600 |
| H | -1.43988800 | -2.52830100 | 1.08872700  |
| H | -2.85292900 | -2.46517100 | -1.60717800 |
| H | -3.58473900 | -1.24318000 | 1.10151900  |
| H | -2.84133300 | 0.07140500  | -1.55886700 |
| H | -3.57446000 | 1.29747200  | 1.14699400  |
| H | -2.84488000 | 2.60595800  | -1.52240200 |
| H | 5.18135200  | 1.28280900  | 1.30667900  |

|   |             |             |             |
|---|-------------|-------------|-------------|
| H | 5.93870600  | 2.56478400  | -1.40880200 |
| H | 5.23289500  | 3.83762000  | 1.32411300  |
| H | 3.72529100  | 3.88429100  | -1.37137100 |
| H | 5.93236100  | 5.12238400  | -1.40212300 |
| H | 7.47044400  | 5.16333100  | 1.27639200  |
| H | 9.18459900  | 3.79372200  | 0.10868400  |
| H | 7.39168800  | 2.54794900  | 1.32520100  |
| H | 9.15929300  | 1.26705700  | 0.09714700  |
| H | 5.92853000  | 0.03028600  | -1.42503900 |
| H | 7.37063300  | 0.00555200  | 1.31542300  |
| H | 8.18850400  | -1.23564300 | -1.39803100 |
| H | 7.37364400  | -2.53667900 | 1.28890000  |
| H | 5.92416400  | -2.50468400 | -1.44677300 |
| H | 5.17158400  | -1.25916600 | 1.28691000  |
| H | 8.21216000  | -3.74429900 | -1.43273500 |
| H | 7.43501900  | -5.15097300 | 1.20356700  |
| H | 5.42849000  | -5.95824500 | -0.02904500 |
| H | 5.20415100  | -3.81312400 | 1.26567100  |
| H | 3.70510400  | -3.80911000 | -1.43494200 |
| H | -3.58380100 | -3.81081200 | 1.03885900  |
| H | -5.09887600 | -3.74888100 | -1.65220200 |
| H | -9.04670900 | -3.71820000 | -0.41739300 |
| H | -7.81477000 | -5.89273000 | -0.11631200 |
| H | -5.78716700 | -5.05960800 | 1.06446000  |
| H | -3.38075800 | -5.92829400 | -0.31402500 |
| H | -1.41721800 | -5.15301500 | 0.98276300  |
| H | 1.02691900  | -5.92217800 | 0.08908700  |
| H | 2.97486600  | -5.02409800 | 1.28471300  |
| H | -8.04977100 | -1.21997300 | 1.09464800  |
| H | -9.01627700 | 1.32562200  | -0.32558600 |
| H | -8.06389300 | 3.80001800  | 1.21175800  |
| H | -7.31327000 | 5.24243100  | -1.41288400 |
| H | -5.29526900 | 6.03430000  | -0.18844500 |
| H | -3.34696800 | 6.02688500  | -0.11132200 |
| H | -1.37595500 | 5.19930800  | 1.13846000  |
| H | 1.06693500  | 5.99005200  | 0.20168400  |
| H | 3.01692200  | 5.06299600  | 1.36994300  |
| H | -5.79326800 | -2.49970600 | 1.09485900  |
| H | -5.05592900 | -1.19351200 | -1.61457100 |
| H | -5.78029600 | 0.03169800  | 1.13612000  |
| H | -5.04911900 | 1.35123500  | -1.56839300 |
| H | -5.77531700 | 2.56240500  | 1.18773400  |
| H | -5.08330300 | 3.90651800  | -1.51469000 |
| H | -3.55647000 | 3.86650800  | 1.17007200  |
| H | -7.24555700 | 0.08631500  | -1.59208600 |
| H | -7.25113100 | 2.62906200  | -1.53358500 |
| H | -7.26224200 | -2.45788400 | -1.63008400 |
| O | -2.54412500 | -0.18421200 | 3.54857500  |
| C | -1.64198600 | -0.91812000 | 3.53557000  |
| O | -0.73923600 | -1.65203200 | 3.52588100  |

Graphane-H<sub>2</sub>O

|   |             |             |             |
|---|-------------|-------------|-------------|
| C | -5.10402500 | 1.30210800  | -0.34276300 |
| C | -5.83799800 | 2.56345200  | 0.17199800  |
| C | -3.63922900 | 1.29765300  | 0.14171100  |
| C | -8.03100300 | 1.29291800  | 0.16059400  |
| C | -7.30954300 | 2.56648500  | -0.31339600 |
| C | -5.11990000 | 3.84560800  | -0.31396300 |
| C | -2.92085400 | 2.57167100  | -0.32715000 |
| C | -8.04969200 | 3.81661700  | 0.20090200  |
| C | -5.86577600 | 5.08767400  | 0.21969800  |
| C | -3.64743800 | 3.84595000  | 0.14460200  |
| C | -1.45705600 | 2.56820800  | 0.14760600  |
| C | -7.32945400 | 5.09718300  | -0.23659700 |
| H | -5.81671200 | 5.10943900  | 1.32481000  |
| C | -2.90821600 | 5.08832000  | -0.36941300 |
| C | -0.71767600 | 1.29780100  | -0.30522200 |
| C | -0.70473400 | 3.83298600  | -0.29848200 |
| H | -7.84750000 | 5.98187800  | 0.17812200  |
| C | -1.46250900 | 5.09934600  | 0.10992700  |
| H | -2.92462100 | 5.09122200  | -1.46832300 |
| C | 0.74370100  | 1.29137500  | 0.17694800  |
| C | 0.73797100  | 3.82586800  | 0.23011500  |
| H | -0.96289100 | 5.98577100  | -0.29187400 |
| C | 1.48795500  | 2.56995000  | -0.24383800 |
| C | 1.49890300  | 5.09919100  | -0.15018100 |
| C | 2.95121000  | 2.56021200  | 0.23266100  |
| C | 2.94466400  | 5.07487200  | 0.32851200  |
| H | 1.47468300  | 5.21584600  | -1.24496100 |
| C | 3.66850100  | 1.29459800  | -0.25963400 |
| C | 3.68136500  | 3.84226400  | -0.21183500 |
| H | 3.45185800  | 5.99882400  | 0.02467100  |
| C | 5.13147600  | 1.28618000  | 0.22997700  |
| C | 5.15373100  | 3.82946200  | 0.24695000  |
| C | 5.86972000  | 2.55456500  | -0.26081300 |
| C | 5.90281500  | 5.07897300  | -0.26429500 |
| C | 7.34022400  | 2.54597800  | 0.22771000  |
| H | 5.40047000  | 5.99664000  | 0.09676400  |
| C | 7.36608200  | 5.07741200  | 0.19331700  |
| C | 8.08407800  | 3.80269700  | -0.26454300 |
| C | 8.05979900  | 1.27841200  | -0.26486800 |
| H | 7.88653100  | 5.96776400  | -0.20614900 |
| C | 8.07527900  | -3.76906800 | -0.31929700 |
| C | 8.05675500  | -1.24499300 | -0.28342800 |
| C | 7.35439500  | -5.04853700 | 0.12033400  |
| C | 7.33419100  | -2.51782800 | 0.19070200  |
| C | 7.32745900  | 0.01397600  | 0.21721500  |
| C | 5.89120900  | -5.04035400 | -0.33748300 |
| H | 7.87293700  | -5.93428900 | -0.29168900 |
| C | 5.86378300  | -2.51606300 | -0.29825200 |

|   |             |             |             |
|---|-------------|-------------|-------------|
| C | 5.86022000  | 0.01939300  | -0.27704600 |
| C | 5.14487700  | -3.79647300 | 0.19126300  |
| H | 5.84328400  | -5.06625800 | -1.44254300 |
| C | 5.12830000  | -1.25321800 | 0.21049100  |
| C | 3.67276000  | -3.79990300 | -0.26809300 |
| C | 3.66578200  | -1.25025900 | -0.28042900 |
| C | 2.93271700  | -5.03698700 | 0.25755400  |
| C | 2.94504600  | -2.52175000 | 0.19134700  |
| C | 2.93999400  | 0.01908600  | 0.19458400  |
| C | 1.48689400  | -5.05282000 | -0.22127900 |
| H | 3.43748200  | -5.95864600 | -0.05690500 |
| C | 1.48296800  | -2.52182800 | -0.28859000 |
| C | 1.48169200  | 0.02563600  | -0.28736400 |
| C | 0.72854600  | -3.78114000 | 0.16896500  |
| H | 1.46225000  | -5.15853600 | -1.31705200 |
| C | 0.74072300  | -1.24799800 | 0.14720500  |
| C | -0.71429600 | -3.77841900 | -0.35909300 |
| C | -0.72134100 | -1.24344000 | -0.33335000 |
| C | -1.47421600 | -5.04894300 | 0.03205600  |
| C | -1.46331500 | -2.51811000 | 0.10355800  |
| C | -1.45604500 | 0.02357300  | 0.13325700  |
| C | -2.91960000 | -5.02772300 | -0.44770600 |
| H | -0.97625900 | -5.93107700 | -0.38129400 |
| C | -2.92717900 | -2.51187100 | -0.37006300 |
| C | -2.91653900 | 0.02940200  | -0.34128000 |
| C | -3.65563800 | -3.79124700 | 0.08467000  |
| H | -2.93520100 | -5.01456800 | -1.54658500 |
| C | -3.64174000 | -1.24461300 | 0.12273300  |
| C | -5.12838600 | -3.78145000 | -0.37274000 |
| C | -5.10661200 | -1.23788700 | -0.36178100 |
| C | -5.87628800 | -5.02983200 | 0.14303600  |
| C | -5.84333900 | -2.50537800 | 0.13356600  |
| C | -5.83396800 | 0.02906600  | 0.14679300  |
| C | -7.34039400 | -5.02952200 | -0.31198700 |
| H | -5.37457800 | -5.94845400 | -0.21596700 |
| C | -7.31510800 | -2.49799800 | -0.35094100 |
| C | -7.30278500 | 0.03425100  | -0.34265300 |
| C | -8.05751200 | -3.75409700 | 0.14529600  |
| H | -7.39310800 | -5.11766600 | -1.41407000 |
| C | -8.03359000 | -1.23006200 | 0.14231900  |
| H | 8.15968100  | 3.79119100  | -1.36825000 |
| H | 8.12632400  | 1.28261400  | -1.36879300 |
| H | 9.10008500  | -1.24582400 | 0.08138000  |
| H | 9.11434800  | -3.77222100 | 0.05755300  |
| H | -8.12971800 | -3.74047100 | 1.24928600  |
| H | -9.07790300 | -1.22358700 | -0.21916800 |
| H | -8.09439100 | 1.27974000  | 1.26472500  |
| H | -9.08939100 | 3.82067300  | -0.17393900 |
| H | 0.71720500  | -1.24928300 | 1.25303300  |
| H | 0.72527700  | 1.27499900  | 1.28439200  |

|   |             |             |             |
|---|-------------|-------------|-------------|
| H | -1.47353100 | 0.00206300  | 1.23817500  |
| H | 1.49898400  | 0.03822100  | -1.39318800 |
| H | -0.70363800 | -1.23109900 | -1.43907600 |
| H | -0.69806600 | 1.30546400  | -1.41087400 |
| H | 1.50318300  | -2.53285100 | -1.39453700 |
| H | 2.92965700  | -2.51787100 | 1.29543000  |
| H | 3.66064900  | -1.24828400 | -1.39012600 |
| H | 2.92072800  | 0.01005800  | 1.29838200  |
| H | 3.66276000  | 1.31026300  | -1.36928100 |
| H | 2.93837600  | 2.54125000  | 1.33625000  |
| H | 1.50645100  | 2.59368000  | -1.34987700 |
| H | 0.68756100  | 3.78265800  | 1.33317900  |
| H | -0.65410900 | 3.81395900  | -1.40212700 |
| H | -1.47525600 | 2.56692700  | 1.25411200  |
| H | 0.67754500  | -3.75118000 | 1.27430500  |
| H | -0.66200300 | -3.74552800 | -1.46231700 |
| H | -1.48397400 | -2.52186500 | 1.20880600  |
| H | -2.91824600 | -2.49778400 | -1.47390200 |
| H | -3.62774700 | -1.25685300 | 1.23185700  |
| H | -2.90474000 | 0.03861900  | -1.44495200 |
| H | -3.62920700 | 1.29002900  | 1.25122100  |
| H | -2.90910300 | 2.57486500  | -1.43084700 |
| H | 5.13674900  | 1.27918100  | 1.34605700  |
| H | 5.86640600  | 2.56272800  | -1.37614600 |
| H | 5.18193900  | 3.83382100  | 1.36313900  |
| H | 3.65110200  | 3.87677000  | -1.31938600 |
| H | 5.85458200  | 5.12074800  | -1.36882500 |
| H | 7.41683200  | 5.16397800  | 1.29568800  |
| H | 9.12317200  | 3.79819700  | 0.11216100  |
| H | 7.34419100  | 2.54841900  | 1.34459800  |
| H | 9.10307200  | 1.27146800  | 0.10000400  |
| H | 5.86103000  | 0.02796200  | -1.39257200 |
| H | 7.32888600  | 0.00582100  | 1.33430300  |
| H | 8.12322800  | -1.23311500 | -1.38730100 |
| H | 7.33788800  | -2.53621300 | 1.30745200  |
| H | 5.86078100  | -2.50823100 | -1.41358800 |
| H | 5.13284900  | -1.26247500 | 1.32655400  |
| H | 8.15118600  | -3.74198400 | -1.42271900 |
| H | 7.40486900  | -5.15088900 | 1.22136400  |
| H | 5.38684500  | -5.96199600 | 0.01031500  |
| H | 5.17304500  | -3.81660300 | 1.30726300  |
| H | 3.64272800  | -3.82088000 | -1.37591400 |
| H | -3.62387000 | -3.81716400 | 1.19215800  |
| H | -5.15818000 | -3.78849200 | -1.48875000 |
| H | -9.09758600 | -3.75038000 | -0.22839800 |
| H | -7.85988500 | -5.91918700 | 0.09009000  |
| H | -5.82620900 | -5.06786500 | 1.24774800  |
| H | -3.42638400 | -5.94992700 | -0.13784100 |
| H | -1.45181400 | -5.15562700 | 1.12802300  |
| H | 0.98611800  | -5.93325600 | 0.19165200  |

|   |             |             |             |
|---|-------------|-------------|-------------|
| H | 2.94980500  | -5.02955000 | 1.35650900  |
| H | -8.09616900 | -1.23328100 | 1.24659200  |
| H | -9.07511400 | 1.29403000  | -0.20159700 |
| H | -8.12328000 | 3.78661200  | 1.30443800  |
| H | -7.38092600 | 5.20184700  | -1.33731500 |
| H | -5.36183900 | 6.01045400  | -0.12538600 |
| H | -3.41304300 | 6.00691400  | -0.04589900 |
| H | -1.43866200 | 5.19133900  | 1.20709200  |
| H | 1.00111300  | 5.97730500  | 0.27148200  |
| H | 2.96129100  | 5.05420100  | 1.42721900  |
| H | -5.83652600 | -2.51068000 | 1.24914000  |
| H | -5.11568300 | -1.23204200 | -1.47776100 |
| H | -5.83062300 | 0.02045000  | 1.26255800  |
| H | -5.11318600 | 1.31329600  | -1.45869300 |
| H | -5.83224900 | 2.55135000  | 1.28739700  |
| H | -5.14859700 | 3.86952700  | -1.42981500 |
| H | -3.61708300 | 3.85687400  | 1.25261200  |
| H | -7.30786200 | 0.04234900  | -1.45963500 |
| H | -7.31590600 | 2.58685100  | -1.43001700 |
| H | -7.32221500 | -2.50180900 | -1.46772300 |
| H | -0.25843000 | -2.04086400 | 3.11677200  |
| O | -0.76193800 | -1.28455600 | 3.44807600  |
| H | -0.26604000 | -0.51735700 | 3.13057000  |

#### Graphane-H<sub>2</sub>

|   |             |             |             |
|---|-------------|-------------|-------------|
| C | 5.11795500  | -1.26986600 | -0.29291100 |
| C | 5.85305800  | -2.53456200 | 0.21186700  |
| C | 3.65268600  | -1.27149400 | 0.19044100  |
| C | 8.04486400  | -1.26142800 | 0.21129100  |
| C | 7.32493100  | -2.53216100 | -0.27259700 |
| C | 5.13687400  | -3.81335000 | -0.28561500 |
| C | 2.93596300  | -2.54176200 | -0.29062000 |
| C | 8.06611800  | -3.78547600 | 0.23237100  |
| C | 5.88335000  | -5.05894200 | 0.23888400  |
| C | 3.66343700  | -3.81949800 | 0.17002700  |
| C | 1.47124400  | -2.54410600 | 0.18154700  |
| C | 7.34757300  | -5.06334900 | -0.21576000 |
| H | 5.83281800  | -5.09001700 | 1.34364300  |
| C | 2.92680800  | -5.05756800 | -0.35782500 |
| C | 0.73051800  | -1.27051900 | -0.25990600 |
| C | 0.72163900  | -3.80516800 | -0.27949600 |
| H | 7.86607900  | -5.95074600 | 0.19251300  |
| C | 1.47993800  | -5.07478800 | 0.11779400  |
| H | 2.94585400  | -5.04943900 | -1.45667000 |
| C | -0.73124800 | -1.27035000 | 0.22097400  |
| C | -0.72245200 | -3.80496100 | 0.24525200  |
| H | 0.98235700  | -5.95763100 | -0.29432000 |
| C | -1.47254300 | -2.54473500 | -0.21720200 |
| C | -1.48088100 | -5.07501200 | -0.15040900 |
| C | -2.93647100 | -2.54172000 | 0.25739600  |

|   |             |             |             |
|---|-------------|-------------|-------------|
| C | -2.92734700 | -5.05752400 | 0.32651100  |
| H | -1.45516700 | -5.17927300 | -1.24645000 |
| C | -3.65394700 | -1.27165400 | -0.22308400 |
| C | -3.66469800 | -3.81977600 | -0.20118600 |
| H | -3.43300900 | -5.97881600 | 0.01196100  |
| C | -5.11827100 | -1.26983300 | 0.26314200  |
| C | -5.13743100 | -3.81332300 | 0.25672100  |
| C | -5.85432600 | -2.53464200 | -0.24000700 |
| C | -5.88479000 | -5.05904300 | -0.26622200 |
| C | -7.32539700 | -2.53207100 | 0.24688400  |
| H | -5.38151700 | -5.97931600 | 0.08661900  |
| C | -7.34828400 | -5.06327900 | 0.19074800  |
| C | -8.06749100 | -3.78547700 | -0.25651500 |
| C | -8.04605600 | -1.26142600 | -0.23613600 |
| H | -7.86748000 | -5.95074200 | -0.21651000 |
| C | -8.06746600 | 3.78581200  | -0.25568000 |
| C | -8.04605300 | 1.26175700  | -0.23584300 |
| C | -7.34827500 | 5.06350600  | 0.19191800  |
| C | -7.32539200 | 2.53229000  | 0.24746500  |
| C | -7.31574500 | 0.00010700  | 0.25674500  |
| C | -5.88476800 | 5.05937800  | -0.26501300 |
| H | -7.86745800 | 5.95107000  | -0.21513300 |
| C | -5.85431300 | 2.53496800  | -0.23939700 |
| C | -5.84762200 | 0.00016400  | -0.23495400 |
| C | -5.13742300 | 3.81353100  | 0.25765000  |
| H | -5.83596600 | 5.09103900  | -1.36983300 |
| C | -5.11827000 | 1.27003600  | 0.26346100  |
| C | -3.66469200 | 3.82009200  | -0.20024700 |
| C | -3.65394400 | 1.27196300  | -0.22275000 |
| C | -2.92733800 | 5.05771500  | 0.32772800  |
| C | -2.93648100 | 2.54192200  | 0.25804400  |
| C | -2.92834900 | 0.00009300  | 0.24584400  |
| C | -1.48088700 | 5.07532700  | -0.14923200 |
| H | -3.43300400 | 5.97907800  | 0.01339900  |
| C | -1.47256100 | 2.54505900  | -0.21656400 |
| C | -1.46839600 | 0.00012500  | -0.23129200 |
| C | -0.72241700 | 3.80518800  | 0.24606700  |
| H | -1.45520600 | 5.17987000  | -1.24524600 |
| C | -0.73124400 | 1.27053600  | 0.22116100  |
| C | 0.72160900  | 3.80549400  | -0.27886700 |
| C | 0.73053900  | 1.27081500  | -0.25960600 |
| C | 1.47995300  | 5.07505600  | 0.11849700  |
| C | 1.47128800  | 2.54437600  | 0.18187400  |
| C | 1.46717000  | 0.00010300  | 0.19284400  |
| C | 2.92675300  | 5.05791800  | -0.35734800 |
| H | 0.98229900  | 5.95794400  | -0.29343100 |
| C | 2.93595100  | 2.54207300  | -0.29046000 |
| C | 2.92829400  | 0.00014800  | -0.28057400 |
| C | 3.66349300  | 3.81977300  | 0.17016800  |
| H | 2.94563900  | 5.05001900  | -1.45619700 |

|   |             |             |             |
|---|-------------|-------------|-------------|
| C | 3.65270400  | 1.27177100  | 0.19046700  |
| C | 5.13683600  | 3.81362000  | -0.28582100 |
| C | 5.11794400  | 1.27013300  | -0.29297900 |
| C | 5.88344200  | 5.05925400  | 0.23838800  |
| C | 5.85310500  | 2.53486600  | 0.21162600  |
| C | 5.84643100  | 0.00015000  | 0.20644500  |
| C | 7.34757000  | 5.06360300  | -0.21654900 |
| H | 5.38065100  | 5.97958400  | -0.11499000 |
| C | 7.32491000  | 2.53238700  | -0.27303800 |
| C | 7.31536800  | 0.00011300  | -0.28281000 |
| C | 8.06621700  | 3.78577900  | 0.23154700  |
| H | 7.40005400  | 5.15954300  | -1.31804500 |
| C | 8.04487600  | 1.26174200  | 0.21104400  |
| H | -8.14224200 | -3.76449000 | -1.36013600 |
| H | -8.11105400 | -1.25675900 | -1.34014300 |
| H | -9.08966900 | 1.25888300  | 0.12787200  |
| H | -9.10676300 | 3.78559900  | 0.12032600  |
| H | 8.13943700  | 3.76466200  | 1.33526800  |
| H | 9.08902600  | 1.25897000  | -0.15113400 |
| H | 8.10821100  | -1.25662000 | 1.31539500  |
| H | 9.10602800  | -3.78550900 | -0.14192900 |
| H | -0.71435900 | 1.26582500  | 1.32715500  |
| H | -0.71423700 | -1.26585700 | 1.32681800  |
| H | 1.48091700  | -0.00012200 | 1.29918200  |
| H | -1.48288200 | 0.00031400  | -1.33758500 |
| H | 0.71383800  | 1.26661500  | -1.36537600 |
| H | 0.71394200  | -1.26615500 | -1.36568500 |
| H | -1.48945900 | 2.55758300  | -1.32291900 |
| H | -2.92478100 | 2.53361200  | 1.36167800  |
| H | -3.64587800 | 1.27673800  | -1.33261100 |
| H | -2.91230300 | -0.00007300 | 1.34941100  |
| H | -3.64588500 | -1.27613200 | -1.33294700 |
| H | -2.92474900 | -2.53364900 | 1.36102500  |
| H | -1.48941000 | -2.55706600 | -1.32356500 |
| H | -0.67476100 | -3.77309800 | 1.34874200  |
| H | 0.67410800  | -3.77471000 | -1.38305100 |
| H | 1.48617500  | -2.55382400 | 1.28809700  |
| H | -0.67460000 | 3.77312500  | 1.34955400  |
| H | 0.67392800  | 3.77519600  | -1.38241700 |
| H | 1.48643600  | 2.55402000  | 1.28843600  |
| H | 2.92602400  | 2.53480300  | -1.39412600 |
| H | 3.64246700  | 1.27560400  | 1.30030700  |
| H | 2.91572200  | 0.00015800  | -1.38405000 |
| H | 3.64236500  | -1.27539000 | 1.30027800  |
| H | 2.92618600  | -2.53443800 | -1.39429000 |
| H | -5.12559000 | -1.27201000 | 1.37921900  |
| H | -5.84962000 | -2.53250400 | -1.35534600 |
| H | -5.16623000 | -3.82761600 | 1.37279200  |
| H | -3.63376800 | -3.84269500 | -1.30907100 |
| H | -5.83601800 | -5.09044400 | -1.37105100 |



|   |             |             |             |
|---|-------------|-------------|-------------|
| H | -7.39924000 | -5.15906900 | 1.29233000  |
| H | -9.10676900 | -3.78535000 | 0.11954500  |
| H | -7.33048400 | -2.54359600 | 1.36367900  |
| H | -9.08967400 | -1.25863400 | 0.12757300  |
| H | -5.84632300 | 0.00030300  | -1.35050100 |
| H | -7.31893000 | -0.00002300 | 1.37381100  |
| H | -8.11105600 | 1.25734200  | -1.33985000 |
| H | -7.33050000 | 2.54357500  | 1.36426300  |
| H | -5.84958500 | 2.53309900  | -1.35473600 |
| H | -5.12560300 | 1.27194500  | 1.37953800  |
| H | -8.14215900 | 3.76508200  | -1.35930900 |
| H | -7.39925900 | 5.15902200  | 1.29352300  |
| H | -5.38150200 | 5.97956400  | 0.08806100  |
| H | -5.16623500 | 3.82756200  | 1.37372200  |
| H | -3.63376400 | 3.84325700  | -1.30812600 |
| H | 3.63110900  | 3.84170800  | 1.27802500  |
| H | 5.16711100  | 3.82816800  | -1.40184500 |
| H | 9.10601800  | 3.78575800  | -0.14307000 |
| H | 7.86616000  | 5.95103400  | 0.19155300  |
| H | 5.83313600  | 5.09045600  | 1.34315400  |
| H | 3.43213800  | 5.97898000  | -0.04169000 |
| H | 1.45350500  | 5.17827100  | 1.21461100  |
| H | -0.98290200 | 5.95769200  | 0.26339800  |
| H | -2.94526100 | 5.04876000  | 1.42657700  |
| H | 8.10825600  | 1.25712700  | 1.31514800  |
| H | 9.08902700  | -1.25871400 | -0.15085700 |
| H | 8.13900600  | -3.76420700 | 1.33611300  |
| H | 7.40027000  | -5.15937600 | -1.31723900 |
| H | 5.38060700  | -5.97930000 | -0.11448700 |
| H | 3.43216900  | -5.97868700 | -0.04228600 |
| H | 1.45332800  | -5.17813900 | 1.21389200  |
| H | -0.98291500 | -5.95748900 | 0.26200900  |
| H | -2.94528900 | -5.04881300 | 1.42536100  |
| H | 5.84670900  | 2.53245500  | 1.32695700  |
| H | 5.12734100  | 1.27239500  | -1.40904300 |
| H | 5.84328600  | 0.00017900  | 1.32199400  |
| H | 5.12743100  | -1.27223100 | -1.40897300 |
| H | 5.84650700  | -2.53208400 | 1.32719500  |
| H | 5.16740200  | -3.82800400 | -1.40163000 |
| H | 3.63077900  | -3.84156500 | 1.27787200  |
| H | 7.32041100  | 0.00000500  | -1.39986500 |
| H | 7.33185900  | -2.54398400 | -1.38937800 |
| H | 7.33168900  | 2.54396200  | -1.38982200 |
| H | 0.06245100  | 0.01949500  | 3.58909800  |
| H | 0.17341200  | -0.09192000 | 4.31037200  |

Graphane-Be<sup>2+</sup>

|   |             |            |             |
|---|-------------|------------|-------------|
| C | -5.14336000 | 1.27605100 | -0.27663500 |
| C | -5.87681000 | 2.54051500 | 0.23373500  |
| C | -3.68459300 | 1.28858500 | 0.20485800  |

|   |             |             |             |
|---|-------------|-------------|-------------|
| C | -8.06440200 | 1.26133500  | 0.20000200  |
| C | -7.34523900 | 2.53824700  | -0.26519600 |
| C | -5.15765100 | 3.82439400  | -0.24937000 |
| C | -2.96158200 | 2.55877900  | -0.27878400 |
| C | -8.08921400 | 3.78443100  | 0.24819600  |
| C | -5.90626700 | 5.06150100  | 0.29092700  |
| C | -3.68652600 | 3.83653700  | 0.20213100  |
| C | -1.49063100 | 2.58091000  | 0.18587500  |
| C | -7.36771600 | 5.06843100  | -0.17200200 |
| H | -5.86621200 | 5.08232700  | 1.39699100  |
| C | -2.94611500 | 5.07530800  | -0.32119300 |
| C | -0.75858000 | 1.31844300  | -0.28151200 |
| C | -0.72786000 | 3.83710200  | -0.28257400 |
| H | -7.89115900 | 5.94894900  | 0.25185600  |
| C | -1.49298700 | 5.09599000  | 0.14020500  |
| H | -2.98130700 | 5.08708100  | -1.41814000 |
| C | 0.76190900  | 1.32596800  | 0.17715600  |
| C | 0.72713200  | 3.84504400  | 0.22736900  |
| H | -1.00235500 | 5.97906200  | -0.27405200 |
| C | 1.50425500  | 2.60211200  | -0.24127300 |
| C | 1.49491300  | 5.10221700  | -0.19707700 |
| C | 2.96311500  | 2.56334500  | 0.24542800  |
| C | 2.94487100  | 5.08244100  | 0.27693300  |
| H | 1.45763100  | 5.18955300  | -1.29266500 |
| C | 3.68304500  | 1.28550000  | -0.22677600 |
| C | 3.69323200  | 3.84052500  | -0.23027300 |
| H | 3.44795800  | 5.99251600  | -0.06198300 |
| C | 5.13376700  | 1.27565100  | 0.27987900  |
| C | 5.15587200  | 3.82720800  | 0.24601100  |
| C | 5.87778900  | 2.53899900  | -0.22123500 |
| C | 5.91465400  | 5.06097500  | -0.28779600 |
| C | 7.33869800  | 2.53739400  | 0.29932600  |
| H | 5.41406800  | 5.99338600  | 0.03828400  |
| C | 7.36830800  | 5.06790600  | 0.19847300  |
| C | 8.09291600  | 3.78087500  | -0.20606000 |
| C | 8.06395700  | 1.25996300  | -0.15348600 |
| H | 7.89992500  | 5.94565600  | -0.22114900 |
| C | 8.09288300  | -3.78089500 | -0.20635900 |
| C | 8.06394600  | -1.25998700 | -0.15358700 |
| C | 7.36826700  | -5.06795500 | 0.19806800  |
| C | 7.33868100  | -2.53744800 | 0.29913100  |
| C | 7.32512400  | -0.00002800 | 0.32494800  |
| C | 5.91460100  | -5.06096800 | -0.28816400 |
| H | 7.89986600  | -5.94566900 | -0.22165000 |
| C | 5.87776700  | -2.53900200 | -0.22141400 |
| C | 5.86718000  | -0.00000200 | -0.20155200 |
| C | 5.15584300  | -3.82723200 | 0.24575100  |
| H | 5.89265200  | -5.07591900 | -1.39512800 |
| C | 5.13375800  | -1.27568500 | 0.27979600  |
| C | 3.69318700  | -3.84050600 | -0.23049300 |

|   |             |             |             |
|---|-------------|-------------|-------------|
| C | 3.68303500  | -1.28549600 | -0.22685400 |
| C | 2.94485100  | -5.08246100 | 0.27664900  |
| C | 2.96308400  | -2.56334600 | 0.24531400  |
| C | 2.96465300  | -0.00001100 | 0.24491900  |
| C | 1.49487900  | -5.10219000 | -0.19730100 |
| H | 3.44792400  | -5.99250600 | -0.06237100 |
| C | 1.50421500  | -2.60207700 | -0.24129800 |
| C | 1.52191000  | -0.00000500 | -0.25766000 |
| C | 0.72712100  | -3.84504600 | 0.22727900  |
| H | 1.45755500  | -5.18943500 | -1.29289500 |
| C | 0.76178100  | -1.32592600 | 0.17733100  |
| C | -0.72790900 | -3.83710500 | -0.28256500 |
| C | -0.75857200 | -1.31845500 | -0.28146700 |
| C | -1.49298900 | -5.09600200 | 0.14026500  |
| C | -1.49065000 | -2.58091900 | 0.18594700  |
| C | -1.52659700 | -0.00005200 | 0.15664900  |
| C | -2.94618700 | -5.07533900 | -0.32092500 |
| H | -1.00242400 | -5.97905300 | -0.27411800 |
| C | -2.96160900 | -2.55879200 | -0.27865700 |
| C | -2.99193400 | -0.00000700 | -0.28237400 |
| C | -3.68654600 | -3.83651600 | 0.20235600  |
| H | -2.98154700 | -5.08726900 | -1.41786300 |
| C | -3.68461000 | -1.28856900 | 0.20492800  |
| C | -5.15768900 | -3.82439300 | -0.24909400 |
| C | -5.14338000 | -1.27605400 | -0.27654500 |
| C | -5.90629800 | -5.06145400 | 0.29132100  |
| C | -5.87682800 | -2.54047400 | 0.23393100  |
| C | -5.86809300 | 0.00002000  | 0.21699600  |
| C | -7.36776700 | -5.06841000 | -0.17154200 |
| H | -5.40987900 | -5.99148700 | -0.04818200 |
| C | -7.34526700 | -2.53823500 | -0.26496800 |
| C | -7.33375700 | 0.00000600  | -0.28818100 |
| C | -8.08923800 | -3.78436400 | 0.24856500  |
| H | -7.42134800 | -5.19375500 | -1.27073700 |
| C | -8.06441200 | -1.26127200 | 0.20011900  |
| H | 8.20877700  | 3.74271400  | -1.30651600 |
| H | 8.17497900  | 1.24933800  | -1.25480600 |
| H | 9.09941000  | -1.25906700 | 0.24214500  |
| H | 9.12374300  | -3.78745400 | 0.19963600  |
| H | -8.18858300 | -3.74986200 | 1.35054800  |
| H | -9.10536500 | -1.26070000 | -0.18120200 |
| H | -8.15992800 | 1.25207200  | 1.30250700  |
| H | -9.12599300 | 3.79217700  | -0.14256400 |
| H | 0.78432200  | -1.38573600 | 1.32853600  |
| H | 0.78446000  | 1.38560300  | 1.32843200  |
| H | -1.60509400 | -0.00015700 | 1.30764500  |
| H | 1.48121800  | -0.00014000 | -1.35446500 |
| H | -0.71954900 | -1.26617400 | -1.37710800 |
| H | -0.71959400 | 1.26602200  | -1.37714600 |
| H | 1.50729200  | -2.58675000 | -1.34436800 |

|   |             |             |             |
|---|-------------|-------------|-------------|
| H | 2.94757800  | -2.57340400 | 1.34806900  |
| H | 3.68392500  | -1.27889100 | -1.33401900 |
| H | 2.93820700  | -0.00006200 | 1.34872200  |
| H | 3.68394300  | 1.27894500  | -1.33394300 |
| H | 2.94753400  | 2.57335000  | 1.34818300  |
| H | 1.50745400  | 2.58694500  | -1.34434700 |
| H | 0.70116800  | 3.82386200  | 1.33162900  |
| H | -0.70004100 | 3.81128600  | -1.38548200 |
| H | -1.49282500 | 2.58126500  | 1.29343800  |
| H | 0.70121700  | -3.82395100 | 1.33154100  |
| H | -0.70017700 | -3.81128100 | -1.38547400 |
| H | -1.49278000 | -2.58130000 | 1.29350800  |
| H | -2.95994300 | -2.56208000 | -1.38044900 |
| H | -3.66875100 | -1.28063700 | 1.31365400  |
| H | -2.96456800 | -0.00004600 | -1.38203900 |
| H | -3.66874800 | 1.28071400  | 1.31358200  |
| H | -2.95987800 | 2.56200100  | -1.38057500 |
| H | 5.13590900  | 1.28734800  | 1.39688700  |
| H | 5.90496100  | 2.52646900  | -1.33697300 |
| H | 5.17735900  | 3.86368700  | 1.36290500  |
| H | 3.67036600  | 3.83992700  | -1.33685000 |
| H | 5.89273500  | 5.07600300  | -1.39476100 |
| H | 7.40516200  | 5.19757700  | 1.29766800  |
| H | 9.12377500  | 3.78738900  | 0.19993900  |
| H | 7.32288500  | 2.56533000  | 1.41633500  |
| H | 9.09941900  | 1.25900600  | 0.24225100  |
| H | 5.90033200  | 0.00003400  | -1.31751800 |
| H | 7.30658300  | -0.00007300 | 1.44246900  |
| H | 8.17496200  | -1.24927900 | -1.25490700 |
| H | 7.32288100  | -2.56547000 | 1.41613900  |
| H | 5.90492900  | -2.52639200 | -1.33715200 |
| H | 5.13591300  | -1.28745900 | 1.39680200  |
| H | 8.20874200  | -3.74264300 | -1.30681300 |
| H | 7.40514700  | -5.19773000 | 1.29725000  |
| H | 5.41401500  | -5.99339800 | 0.03786500  |
| H | 5.17735500  | -3.86379400 | 1.36264300  |
| H | 3.67029000  | -3.83983300 | -1.33706900 |
| H | -3.64597300 | -3.84166900 | 1.30893700  |
| H | -5.19623500 | -3.85638500 | -1.36603000 |
| H | -9.12603100 | -3.79213500 | -0.14215500 |
| H | -7.89120000 | -5.94888100 | 0.25242700  |
| H | -5.86619300 | -5.08220600 | 1.39738500  |
| H | -3.44564400 | -5.98795400 | 0.01680800  |
| H | -1.44863400 | -5.18951900 | 1.23544700  |
| H | 1.00085000  | -5.98674500 | 0.20930400  |
| H | 2.97006900  | -5.10261700 | 1.37388500  |
| H | -8.15992800 | -1.25190900 | 1.30262400  |
| H | -9.10535300 | 1.26073900  | -0.18132800 |
| H | -8.18860000 | 3.75002900  | 1.35017900  |
| H | -7.42124600 | 5.19366900  | -1.27121200 |

|    |             |             |             |
|----|-------------|-------------|-------------|
| H  | -5.40982300 | 5.99150600  | -0.04861600 |
| H  | -3.44562000 | 5.98797100  | 0.01633700  |
| H  | -1.44879600 | 5.18943800  | 1.23539900  |
| H  | 1.00087200  | 5.98674100  | 0.20958500  |
| H  | 2.97003600  | 5.10250200  | 1.37417300  |
| H  | -5.88750100 | -2.53164300 | 1.34959100  |
| H  | -5.16253600 | -1.28676800 | -1.39434300 |
| H  | -5.88555200 | 0.00006300  | 1.33277900  |
| H  | -5.16250300 | 1.28668200  | -1.39443200 |
| H  | -5.88750800 | 2.53176500  | 1.34939400  |
| H  | -5.19616200 | 3.85629800  | -1.36630900 |
| H  | -3.64599100 | 3.84175200  | 1.30871200  |
| H  | -7.33111700 | -0.00004500 | -1.40612000 |
| H  | -7.34572400 | 2.56389500  | -1.38259600 |
| H  | -7.34577600 | -2.56399500 | -1.38236600 |
| Be | -0.00566300 | 0.00012500  | 0.91120100  |

Graphane-Ca<sup>2+</sup>

|   |             |            |             |
|---|-------------|------------|-------------|
| C | -5.17612600 | 1.26906400 | -0.28452500 |
| C | -5.88489800 | 2.54177200 | 0.23960100  |
| C | -3.69302600 | 1.28227200 | 0.12337800  |
| C | -8.06925800 | 1.26247200 | 0.36616200  |
| C | -7.38137800 | 2.53052900 | -0.16573100 |
| C | -5.20274000 | 3.81416500 | -0.32104700 |
| C | -3.00677300 | 2.54261800 | -0.42830400 |
| C | -8.09444800 | 3.78732200 | 0.36615100  |
| C | -5.91712200 | 5.06652800 | 0.23052800  |
| C | -3.70679700 | 3.83587000 | 0.03780200  |
| C | -1.52503600 | 2.56668900 | -0.02387500 |
| C | -7.40611100 | 5.06115400 | -0.13447700 |
| H | -5.80360200 | 5.11845000 | 1.32985600  |
| C | -2.99906600 | 5.05111700 | -0.57718300 |
| C | -0.79757100 | 1.27691500 | -0.43995100 |
| C | -0.78024500 | 3.80974400 | -0.54857000 |
| H | -7.90262400 | 5.95199800 | 0.29781800  |
| C | -1.53014700 | 5.09310600 | -0.17400800 |
| H | -3.07701600 | 5.00503600 | -1.67105300 |
| C | 0.65806600  | 1.32567000 | 0.04578600  |
| C | 0.67412000  | 3.83862600 | -0.04487500 |
| H | -1.05474400 | 5.95386300 | -0.65039000 |
| C | 1.43781800  | 2.56036800 | -0.43361100 |
| C | 1.45039300  | 5.07748700 | -0.49760100 |
| C | 2.88172500  | 2.55935300 | 0.10134500  |
| C | 2.87440100  | 5.08500100 | 0.04687000  |
| H | 1.46646000  | 5.11101600 | -1.59630500 |
| C | 3.62911800  | 1.28036300 | -0.30310400 |
| C | 3.64067600  | 3.82285500 | -0.37041000 |
| H | 3.39885700  | 5.97838300 | -0.30451900 |
| C | 5.07184000  | 1.27837000 | 0.23222200  |
| C | 5.08419100  | 3.82559400 | 0.16552300  |

|   |             |             |             |
|---|-------------|-------------|-------------|
| C | 5.82705700  | 2.53624400  | -0.26293000 |
| C | 5.85930000  | 5.05501000  | -0.35501600 |
| C | 7.27290800  | 2.54080700  | 0.29731200  |
| H | 5.34726100  | 5.98993800  | -0.05426100 |
| C | 7.29804000  | 5.06977800  | 0.17290800  |
| C | 8.03771300  | 3.78136200  | -0.19892000 |
| C | 8.01137900  | 1.26016900  | -0.12543300 |
| H | 7.83919300  | 5.94485800  | -0.24105300 |
| C | 8.03765000  | -3.78157700 | -0.19673200 |
| C | 8.01136000  | -1.26034200 | -0.12469100 |
| C | 7.29785700  | -5.06975600 | 0.17567500  |
| C | 7.27280800  | -2.54072300 | 0.29869500  |
| C | 7.26175500  | 0.00005500  | 0.33672300  |
| C | 5.85923700  | -5.05523100 | -0.35258200 |
| H | 7.83907000  | -5.94509500 | -0.23765500 |
| C | 5.82703800  | -2.53640000 | -0.26174900 |
| C | 5.81683700  | -0.00006500 | -0.22447600 |
| C | 5.08403400  | -3.82553200 | 0.16713900  |
| H | 5.86935800  | -5.06128500 | -1.46028900 |
| C | 5.07179300  | -1.27828800 | 0.23275000  |
| C | 3.64068200  | -3.82294300 | -0.36923500 |
| C | 3.62912500  | -1.28042600 | -0.30271700 |
| C | 2.87420500  | -5.08495600 | 0.04808200  |
| C | 2.88161700  | -2.55928800 | 0.10191800  |
| C | 2.91225400  | 0.00002800  | 0.17469400  |
| C | 1.45045000  | -5.07749900 | -0.49705500 |
| H | 3.39879700  | -5.97845400 | -0.30280300 |
| C | 1.43786500  | -2.56038700 | -0.43346000 |
| C | 1.42180100  | -0.00000300 | -0.24667600 |
| C | 0.67403000  | -3.83856600 | -0.04481000 |
| H | 1.46705000  | -5.11115700 | -1.59574700 |
| C | 0.65803700  | -1.32558100 | 0.04552800  |
| C | -0.78016000 | -3.80969000 | -0.54896500 |
| C | -0.79755700 | -1.27681400 | -0.44032000 |
| C | -1.53019500 | -5.09303100 | -0.17463400 |
| C | -1.52506000 | -2.56662900 | -0.02443800 |
| C | -1.50768900 | -0.00001500 | 0.03970500  |
| C | -2.99897300 | -5.05100400 | -0.57828600 |
| H | -1.05464400 | -5.95380700 | -0.65082600 |
| C | -3.00675000 | -2.54250900 | -0.42900000 |
| C | -2.99146900 | 0.00004400  | -0.36119700 |
| C | -3.70687800 | -3.83586000 | 0.03669400  |
| H | -3.07657500 | -5.00472200 | -1.67217400 |
| C | -3.69305200 | -1.28231800 | 0.12298600  |
| C | -5.20271700 | -3.81402000 | -0.32259400 |
| C | -5.17612300 | -1.26893700 | -0.28502800 |
| C | -5.91727200 | -5.06662800 | 0.22819000  |
| C | -5.88498100 | -2.54186100 | 0.23846900  |
| C | -5.87627200 | -0.00004700 | 0.25618300  |
| C | -7.40617100 | -5.06102500 | -0.13717700 |

|   |             |             |             |
|---|-------------|-------------|-------------|
| H | -5.44398600 | -5.98451700 | -0.17137100 |
| C | -7.38139400 | -2.53038900 | -0.16708200 |
| C | -7.36841700 | 0.00007000  | -0.16113400 |
| C | -8.09459200 | -3.78745100 | 0.36399000  |
| H | -7.53031500 | -5.15318400 | -1.23395000 |
| C | -8.06931300 | -1.26260700 | 0.36542400  |
| H | 8.18277000  | 3.73349000  | -1.29590800 |
| H | 8.15372700  | 1.24398200  | -1.22364600 |
| H | 9.03576900  | -1.26285600 | 0.29861000  |
| H | 9.05743900  | -3.79521600 | 0.23572300  |
| H | -8.11748700 | -3.78019200 | 1.47017200  |
| H | -9.13326600 | -1.25693000 | 0.05733000  |
| H | -8.08391400 | 1.26500500  | 1.47191500  |
| H | -9.15449100 | 3.78313800  | 0.04582100  |
| H | 0.53279500  | -1.58162500 | 1.14280800  |
| H | 0.53323500  | 1.58191000  | 1.14306800  |
| H | -1.48155300 | -0.00017800 | 1.16661200  |
| H | 1.47617200  | 0.00057200  | -1.34621200 |
| H | -0.76876200 | -1.24174000 | -1.54152300 |
| H | -0.76882100 | 1.24207500  | -1.54116800 |
| H | 1.48665200  | -2.50617200 | -1.53374700 |
| H | 2.82150200  | -2.60203800 | 1.21385900  |
| H | 3.64860700  | -1.23248900 | -1.40680300 |
| H | 3.06384800  | 0.00026500  | 1.29903000  |
| H | 3.64848700  | 1.23215400  | -1.40718100 |
| H | 2.82194000  | 2.60244400  | 1.21326800  |
| H | 1.48623800  | 2.50601800  | -1.53390600 |
| H | 0.63360500  | 3.86742400  | 1.06255200  |
| H | -0.75717700 | 3.73785000  | -1.64921500 |
| H | -1.50432100 | 2.61353800  | 1.08590400  |
| H | 0.63314800  | -3.86721200 | 1.06261600  |
| H | -0.75677600 | -3.73780300 | -1.64960600 |
| H | -1.50447500 | -2.61349500 | 1.08534800  |
| H | -3.05237400 | -2.50624900 | -1.52946800 |
| H | -3.62382600 | -1.31029600 | 1.23097300  |
| H | -3.01018400 | 0.00019600  | -1.46321900 |
| H | -3.62371700 | 1.30993400  | 1.23137100  |
| H | -3.05247200 | 2.50665700  | -1.52877800 |
| H | 5.05397000  | 1.30336500  | 1.34703900  |
| H | 5.88485500  | 2.51044000  | -1.37793300 |
| H | 5.06241300  | 3.87732600  | 1.28014400  |
| H | 3.66631200  | 3.77912500  | -1.47573500 |
| H | 5.86916600  | 5.06049100  | -1.46272600 |
| H | 7.30390800  | 5.21142400  | 1.27077100  |
| H | 9.05757800  | 3.79519600  | 0.23334900  |
| H | 7.22809600  | 2.57922700  | 1.41256600  |
| H | 9.03582000  | 1.26287900  | 0.29778600  |
| H | 5.87876900  | -0.00030200 | -1.34028200 |
| H | 7.21829800  | 0.00037900  | 1.45266500  |
| H | 8.15379400  | -1.24475900 | -1.22290100 |

|    |             |             |             |
|----|-------------|-------------|-------------|
| H  | 7.22785200  | -2.57850900 | 1.41396300  |
| H  | 5.88500000  | -2.51108400 | -1.37675800 |
| H  | 5.05382300  | -1.30276600 | 1.34757600  |
| H  | 8.18290200  | -3.73430800 | -1.29371900 |
| H  | 7.30347100  | -5.21076500 | 1.27362300  |
| H  | 5.34711000  | -5.98999400 | -0.05146200 |
| H  | 5.06193300  | -3.87672000 | 1.28177800  |
| H  | 3.66666700  | -3.77949400 | -1.47456500 |
| H  | -3.60164500 | -3.89061900 | 1.13884000  |
| H  | -5.30876400 | -3.81291200 | -1.43539100 |
| H  | -9.15456800 | -3.78308200 | 0.04344100  |
| H  | -7.90281000 | -5.95209900 | 0.29449700  |
| H  | -5.80402000 | -5.11909300 | 1.32752200  |
| H  | -3.48705100 | -5.98073000 | -0.26949500 |
| H  | -1.45123300 | -5.24647100 | 0.91283600  |
| H  | 0.93773400  | -5.98046400 | -0.16022900 |
| H  | 2.84480100  | -5.15273700 | 1.14442500  |
| H  | -8.08406800 | -1.26572800 | 1.47117300  |
| H  | -9.13324000 | 1.25696900  | 0.05816700  |
| H  | -8.11711500 | 3.77947600  | 1.47233500  |
| H  | -7.53052300 | 5.15393000  | -1.23116700 |
| H  | -5.44389800 | 5.98459400  | -0.16869900 |
| H  | -3.48704500 | 5.98078900  | -0.26807400 |
| H  | -1.45080600 | 5.24656700  | 0.91342900  |
| H  | 0.93785800  | 5.98050800  | -0.16063000 |
| H  | 2.84551900  | 5.15311700  | 1.14320600  |
| H  | -5.82373800 | -2.56034700 | 1.35155800  |
| H  | -5.24605800 | -1.26178600 | -1.40079400 |
| H  | -5.82307600 | -0.00026500 | 1.36965800  |
| H  | -5.24615900 | 1.26241100  | -1.40028600 |
| H  | -5.82349200 | 2.55980200  | 1.35268700  |
| H  | -5.30911100 | 3.81358000  | -1.43381600 |
| H  | -3.60123100 | 3.89044600  | 1.13992600  |
| H  | -7.43007800 | 0.00039800  | -1.27763400 |
| H  | -7.45027300 | 2.53330200  | -1.28140800 |
| H  | -7.45012400 | -2.53253500 | -1.28277000 |
| Ca | 1.17436000  | -0.00014000 | 2.43703500  |

#### Graphane-K<sup>+</sup>

|   |             |            |             |
|---|-------------|------------|-------------|
| C | -5.12311100 | 1.27141500 | -0.38954300 |
| C | -5.85306000 | 2.53490200 | 0.12638700  |
| C | -3.65344000 | 1.27276600 | 0.07157300  |
| C | -8.04484100 | 1.26134200 | 0.13019500  |
| C | -7.32769700 | 2.53416400 | -0.35102800 |
| C | -5.14039400 | 3.81625500 | -0.36994700 |
| C | -2.94129000 | 2.54630800 | -0.40660000 |
| C | -8.06590200 | 3.78469600 | 0.16315700  |
| C | -5.88250500 | 5.05880100 | 0.16695900  |
| C | -3.66414000 | 3.82180600 | 0.07044100  |
| C | -1.47122300 | 2.54791500 | 0.04784600  |



|   |             |             |             |
|---|-------------|-------------|-------------|
| C | -7.34919900 | 5.06496800  | -0.27917500 |
| H | -5.82685000 | 5.08662600  | 1.27140300  |
| C | -2.93146000 | 5.06251700  | -0.45602500 |
| C | -0.73293300 | 1.27621100  | -0.40194200 |
| C | -0.72336500 | 3.81180700  | -0.40874700 |
| H | -7.86617400 | 5.94994200  | 0.13851100  |
| C | -1.47975100 | 5.07758900  | 0.00406000  |
| H | -2.96393000 | 5.06498600  | -1.55381100 |
| C | 0.73466800  | 1.27519100  | 0.06054100  |
| C | 0.72502800  | 3.80964500  | 0.10345100  |
| H | -0.98657800 | 5.96110900  | -0.40916300 |
| C | 1.47894900  | 2.55271400  | -0.36145300 |
| C | 1.48442400  | 5.07878500  | -0.29338100 |
| C | 2.93794300  | 2.54574500  | 0.12785400  |
| C | 2.92874100  | 5.06300900  | 0.18984600  |
| H | 1.46047100  | 5.17924000  | -1.38894100 |
| C | 3.66311900  | 1.27403800  | -0.33705900 |
| C | 3.67282000  | 3.82380700  | -0.32507600 |
| H | 3.43499500  | 5.98045500  | -0.13012400 |
| C | 5.11745600  | 1.27147600  | 0.17307000  |
| C | 5.13757200  | 3.81715200  | 0.15371600  |
| C | 5.86176000  | 2.53481300  | -0.32300200 |
| C | 5.89316600  | 5.05776600  | -0.36898400 |
| C | 7.32438100  | 2.53430800  | 0.18964600  |
| H | 5.38677800  | 5.98334500  | -0.03446200 |
| C | 7.34879300  | 5.06553900  | 0.11174100  |
| C | 8.07480100  | 3.78355500  | -0.30991900 |
| C | 8.05192900  | 1.26095700  | -0.27384000 |
| H | 7.87538100  | 5.94841700  | -0.29889700 |
| C | 8.07486000  | -3.78324900 | -0.31020100 |
| C | 8.05194900  | -1.26066000 | -0.27392700 |
| C | 7.34883500  | -5.06527600 | 0.11128700  |
| C | 7.32438400  | -2.53405600 | 0.18941100  |
| C | 7.31397700  | 0.00012500  | 0.20726500  |
| C | 5.89325100  | -5.05749000 | -0.36956300 |
| H | 7.87547300  | -5.94811400 | -0.29937600 |
| C | 5.86179800  | -2.53452300 | -0.32333400 |
| C | 5.85456100  | 0.00014500  | -0.31069200 |
| C | 5.13758100  | -3.81693100 | 0.15315100  |
| H | 5.86464600  | -5.07953200 | -1.47589400 |
| C | 5.11745100  | -1.27126200 | 0.17287600  |
| C | 3.67289300  | -3.82352600 | -0.32585400 |
| C | 3.66312900  | -1.27373900 | -0.33730700 |
| C | 2.92880800  | -5.06287800 | 0.18870700  |
| C | 2.93795400  | -2.54556800 | 0.12727600  |
| C | 2.93085800  | 0.00010300  | 0.11985200  |
| C | 1.48443400  | -5.07851500 | -0.29435000 |
| H | 3.43500500  | -5.98021900 | -0.13165300 |
| C | 1.47897900  | -2.55248100 | -0.36209600 |
| C | 1.47623800  | 0.00017900  | -0.37155600 |

|   |             |             |             |
|---|-------------|-------------|-------------|
| C | 0.72509000  | -3.80943100 | 0.10277400  |
| H | 1.46033200  | -5.17877000 | -1.38992500 |
| C | 0.73476200  | -1.27499700 | 0.06006600  |
| C | -0.72339600 | -3.81155400 | -0.40914900 |
| C | -0.73294900 | -1.27594000 | -0.40211000 |
| C | -1.47969600 | -5.07738100 | 0.00369400  |
| C | -1.47119300 | -2.54768800 | 0.04761300  |
| C | -1.46972800 | 0.00011100  | 0.03467600  |
| C | -2.93152100 | -5.06231100 | -0.45602700 |
| H | -0.98663300 | -5.96082900 | -0.40981300 |
| C | -2.94130700 | -2.54607700 | -0.40668700 |
| C | -2.93785200 | 0.00012300  | -0.41255400 |
| C | -3.66411600 | -3.82156100 | 0.07045200  |
| H | -2.96425500 | -5.06493600 | -1.55380400 |
| C | -3.65343000 | -1.27252800 | 0.07153500  |
| C | -5.14040600 | -3.81602200 | -0.36982200 |
| C | -5.12312300 | -1.27118900 | -0.38949600 |
| C | -5.88246800 | -5.05857200 | 0.16713700  |
| C | -5.85303700 | -2.53465600 | 0.12654000  |
| C | -5.84643400 | 0.00012400  | 0.11467800  |
| C | -7.34922900 | -5.06473400 | -0.27877900 |
| H | -5.38456800 | -5.98216400 | -0.18615200 |
| C | -7.32770800 | -2.53394800 | -0.35077800 |
| C | -7.31836800 | 0.00010600  | -0.36724500 |
| C | -8.06586100 | -3.78443400 | 0.16358400  |
| H | -7.41063500 | -5.17190100 | -1.37921400 |
| C | -8.04482400 | -1.26108100 | 0.13035300  |
| H | 8.17462100  | 3.75399200  | -1.41183100 |
| H | 8.14391700  | 1.25325800  | -1.37646100 |
| H | 9.08916900  | -1.25917900 | 0.11072800  |
| H | 9.10763000  | -3.78700200 | 0.08587700  |
| H | -8.14142400 | -3.75780500 | 1.26698600  |
| H | -9.08989200 | -1.25965900 | -0.23324300 |
| H | -8.11378800 | 1.25446500  | 1.23386600  |
| H | -9.10710200 | 3.78797400  | -0.21085500 |
| H | 0.73200500  | -1.29732900 | 1.17478700  |
| H | 0.73148800  | 1.29734100  | 1.17529000  |
| H | -1.50862800 | 0.00008500  | 1.14967400  |
| H | 1.50110500  | 0.00044800  | -1.47534600 |
| H | -0.72081800 | -1.27573300 | -1.50570100 |
| H | -0.72064900 | 1.27611100  | -1.50553200 |
| H | 1.50212100  | -2.56605400 | -1.46671000 |
| H | 2.91399200  | -2.54496000 | 1.23272400  |
| H | 3.67180700  | -1.27316300 | -1.44573200 |
| H | 2.90511200  | 0.00002200  | 1.22805700  |
| H | 3.67175400  | 1.27371100  | -1.44548400 |
| H | 2.91405200  | 2.54490200  | 1.23329500  |
| H | 1.50206500  | 2.56632200  | -1.46607100 |
| H | 0.68516100  | 3.77863600  | 1.20952600  |
| H | -0.68655900 | 3.78680000  | -1.51186600 |

|   |             |             |             |
|---|-------------|-------------|-------------|
| H | -1.47919500 | 2.55613500  | 1.15949100  |
| H | 0.68542200  | -3.77856200 | 1.20887200  |
| H | -0.68677700 | -3.78646800 | -1.51227000 |
| H | -1.47910300 | -2.55602800 | 1.15928600  |
| H | -2.94261800 | -2.54658500 | -1.50934100 |
| H | -3.62921600 | -1.26919700 | 1.18338800  |
| H | -2.93977100 | 0.00015400  | -1.51454100 |
| H | -3.62928000 | 1.26939200  | 1.18342100  |
| H | -2.94251400 | 2.54680100  | -1.50925700 |
| H | 5.11131700  | 1.27795600  | 1.28869700  |
| H | 5.87892900  | 2.52746100  | -1.43869500 |
| H | 5.15337800  | 3.84176300  | 1.26981900  |
| H | 3.65578200  | 3.84063600  | -1.43236500 |
| H | 5.86446500  | 5.07988500  | -1.47530900 |
| H | 7.38530800  | 5.17753200  | 1.21231200  |
| H | 9.10760400  | 3.78728600  | 0.08606800  |
| H | 7.31204600  | 2.55363600  | 1.30623900  |
| H | 9.08916600  | 1.25944300  | 0.11076700  |
| H | 5.87628900  | 0.00022800  | -1.42663800 |
| H | 7.29957200  | 0.00008700  | 1.32414500  |
| H | 8.14398900  | -1.25285600 | -1.37654300 |
| H | 7.31197700  | -2.55346800 | 1.30600100  |
| H | 5.87904200  | -2.52700200 | -1.43902400 |
| H | 5.11127600  | -1.27788000 | 1.28850000  |
| H | 8.17478000  | -3.75358500 | -1.41210100 |
| H | 7.38525600  | -5.17736000 | 1.21185300  |
| H | 5.38686600  | -5.98310600 | -0.03514500 |
| H | 5.15322700  | -3.84164800 | 1.26925200  |
| H | 3.65601700  | -3.84009400 | -1.43314700 |
| H | -3.61941800 | -3.83478200 | 1.17862900  |
| H | -5.18330100 | -3.83766400 | -1.48613900 |
| H | -9.10711600 | -3.78772000 | -0.21027800 |
| H | -7.86615300 | -5.94967700 | 0.13904700  |
| H | -5.82665400 | -5.08644600 | 1.27157100  |
| H | -3.43241300 | -5.97924800 | -0.12603500 |
| H | -1.43962000 | -5.17628700 | 1.10013400  |
| H | 0.98419300  | -5.96020900 | 0.11447500  |
| H | 2.94346500  | -5.06578300 | 1.28778200  |
| H | -8.11371700 | -1.25409000 | 1.23402800  |
| H | -9.08988900 | 1.25989100  | -0.23345900 |
| H | -8.14162000 | 3.75812800  | 1.26655000  |
| H | -7.41043300 | 5.17205900  | -1.37962900 |
| H | -5.38453800 | 5.98240200  | -0.18620900 |
| H | -3.43243400 | 5.97949300  | -0.12627000 |
| H | -1.43998900 | 5.17631500  | 1.10052700  |
| H | 0.98413800  | 5.96041200  | 0.11553800  |
| H | 2.94326300  | 5.06550500  | 1.28892300  |
| H | -5.84318800 | -2.52805600 | 1.24144100  |
| H | -5.14971400 | -1.27715000 | -1.50626300 |
| H | -5.84068200 | 0.00015000  | 1.22976700  |

|   |             |             |             |
|---|-------------|-------------|-------------|
| H | -5.14964300 | 1.27730800  | -1.50630800 |
| H | -5.84329100 | 2.52833500  | 1.24129300  |
| H | -5.18321200 | 3.83789600  | -1.48626700 |
| H | -3.61952600 | 3.83508200  | 1.17861700  |
| H | -7.32995000 | 0.00003800  | -1.48474800 |
| H | -7.34094300 | 2.55176000  | -1.46815700 |
| H | -7.34101900 | -2.55166200 | -1.46790600 |
| K | -0.04309100 | -0.00335200 | 3.26073600  |

Graphane-Li<sup>+</sup>

|   |             |            |             |
|---|-------------|------------|-------------|
| C | -5.12186300 | 1.27212400 | -0.28633800 |
| C | -5.86514700 | 2.53550800 | 0.21094700  |
| C | -3.66723800 | 1.27614800 | 0.21696000  |
| C | -8.05528600 | 1.26087000 | 0.15478400  |
| C | -7.32668400 | 2.53462300 | -0.30557300 |
| C | -5.14072500 | 3.81765100 | -0.26579500 |
| C | -2.94133300 | 2.54825800 | -0.24670200 |
| C | -8.07834600 | 3.78371400 | 0.19187400  |
| C | -5.89644600 | 5.05853000 | 0.25581000  |
| C | -3.67536600 | 3.82659400 | 0.20879400  |
| C | -1.47973800 | 2.56155500 | 0.23890600  |
| C | -7.35109900 | 5.06539500 | -0.22804900 |
| H | -5.86981700 | 5.08296200 | 1.36169800  |
| C | -2.93424900 | 5.06539800 | -0.31219200 |
| C | -0.73857700 | 1.28014300 | -0.17115400 |
| C | -0.72943900 | 3.81215900 | -0.25362100 |
| H | -7.87902600 | 5.94884200 | 0.17978200  |
| C | -1.48345800 | 5.08172300 | 0.15229600  |
| H | -2.96165400 | 5.06959800 | -1.41010500 |
| C | 0.74376400  | 1.29408800 | 0.26879700  |
| C | 0.72986700  | 3.82267800 | 0.22824300  |
| H | -0.99006100 | 5.96206000 | -0.26657300 |
| C | 1.47826700  | 2.55559800 | -0.21933100 |
| C | 1.48412600  | 5.07620900 | -0.22426600 |
| C | 2.94510700  | 2.55437900 | 0.24703600  |
| C | 2.93534600  | 5.07378200 | 0.23883300  |
| H | 1.44260600  | 5.13972800 | -1.32199900 |
| C | 3.66228200  | 1.27161400 | -0.20223400 |
| C | 3.67470800  | 3.82053900 | -0.24856200 |
| H | 3.43611700  | 5.98040000 | -0.11742700 |
| C | 5.12453000  | 1.27418100 | 0.28067400  |
| C | 5.14156300  | 3.82146200 | 0.22175200  |
| C | 5.86255900  | 2.53184800 | -0.23953200 |
| C | 5.89482100  | 5.05367200 | -0.32319000 |
| C | 7.32830800  | 2.53721500 | 0.26474100  |
| H | 5.39082200  | 5.98487300 | -0.00050300 |
| C | 7.35166400  | 5.06770400 | 0.15357100  |
| C | 8.07634700  | 3.78040200 | -0.25293600 |
| C | 8.05370400  | 1.25968500 | -0.19016700 |
| H | 7.87732300  | 5.94520600 | -0.27005000 |

|   |             |             |             |
|---|-------------|-------------|-------------|
| C | 8.07635500  | -3.78038900 | -0.25301500 |
| C | 8.05370500  | -1.25967400 | -0.19019600 |
| C | 7.35167300  | -5.06770400 | 0.15345100  |
| C | 7.32831200  | -2.53721500 | 0.26468600  |
| C | 7.31872100  | 0.00000000  | 0.29842400  |
| C | 5.89482700  | -5.05366100 | -0.32330100 |
| H | 7.87733000  | -5.94519100 | -0.27020500 |
| C | 5.86256300  | -2.53184000 | -0.23958700 |
| C | 5.85480700  | 0.00000400  | -0.20737100 |
| C | 5.14157000  | -3.82146300 | 0.22166800  |
| H | 5.86306200  | -5.05937700 | -1.42969500 |
| C | 5.12453300  | -1.27418600 | 0.28064400  |
| C | 3.67471500  | -3.82053400 | -0.24864300 |
| C | 3.66228500  | -1.27161200 | -0.20226400 |
| C | 2.93536500  | -5.07379100 | 0.23873300  |
| C | 2.94511100  | -2.55438600 | 0.24697900  |
| C | 2.94566600  | -0.00000600 | 0.29292300  |
| C | 1.48413800  | -5.07621200 | -0.22434700 |
| H | 3.43613700  | -5.98039500 | -0.11756000 |
| C | 1.47826800  | -2.55560400 | -0.21938300 |
| C | 1.47756400  | -0.00000400 | -0.14959000 |
| C | 0.72987800  | -3.82269300 | 0.22819500  |
| H | 1.44260400  | -5.13971200 | -1.32208000 |
| C | 0.74375900  | -1.29410300 | 0.26877300  |
| C | -0.72944700 | -3.81216800 | -0.25361600 |
| C | -0.73857900 | -1.28014400 | -0.17115600 |
| C | -1.48347900 | -5.08172000 | 0.15232300  |
| C | -1.47973400 | -2.56155900 | 0.23892800  |
| C | -1.49029000 | 0.00000500  | 0.25632000  |
| C | -2.93426100 | -5.06538500 | -0.31219400 |
| H | -0.99008900 | -5.96207800 | -0.26650400 |
| C | -2.94134100 | -2.54826100 | -0.24665600 |
| C | -2.94189500 | -0.00000700 | -0.24744600 |
| C | -3.67536800 | -3.82659600 | 0.20884500  |
| H | -2.96163800 | -5.06951400 | -1.41010700 |
| C | -3.66723700 | -1.27614300 | 0.21699800  |
| C | -5.14073900 | -3.81765500 | -0.26569500 |
| C | -5.12186500 | -1.27213000 | -0.28629400 |
| C | -5.89644600 | -5.05851300 | 0.25598400  |
| C | -5.86514800 | -2.53549900 | 0.21102600  |
| C | -5.85770300 | 0.00000600  | 0.19783800  |
| C | -7.35110700 | -5.06540900 | -0.22784300 |
| H | -5.39065500 | -5.98395500 | -0.08078000 |
| C | -7.32668700 | -2.53462600 | -0.30548400 |
| C | -7.31611700 | -0.00000400 | -0.32387600 |
| C | -8.07836000 | -3.78370100 | 0.19198900  |
| H | -7.38488200 | -5.17709200 | -1.32898300 |
| C | -8.05528000 | -1.26085900 | 0.15485000  |
| H | 8.17458700  | 3.73680600  | -1.35454900 |
| H | 8.14634000  | 1.24528400  | -1.29278800 |

|   |             |             |             |
|---|-------------|-------------|-------------|
| H | 9.09146600  | -1.26089100 | 0.19416900  |
| H | 9.11024500  | -3.78962400 | 0.14088900  |
| H | -8.18380500 | -3.75451800 | 1.29311000  |
| H | -9.09059300 | -1.25949300 | -0.23633000 |
| H | -8.15469800 | 1.25303000  | 1.25642300  |
| H | -9.10962200 | 3.78762600  | -0.20916100 |
| H | 0.81339600  | -1.43869000 | 1.38116200  |
| H | 0.81339700  | 1.43863200  | 1.38119300  |
| H | -1.65581900 | 0.00000800  | 1.36900500  |
| H | 1.46495000  | 0.00000700  | -1.25284800 |
| H | -0.71627700 | -1.25085100 | -1.27353600 |
| H | -0.71624600 | 1.25082600  | -1.27353300 |
| H | 1.47320800  | -2.52646000 | -1.32330800 |
| H | 2.93892000  | -2.58127800 | 1.35137800  |
| H | 3.64910200  | -1.24724000 | -1.31033900 |
| H | 2.96727600  | -0.00001900 | 1.39994800  |
| H | 3.64910000  | 1.24727000  | -1.31030900 |
| H | 2.93891700  | 2.58125100  | 1.35143600  |
| H | 1.47321900  | 2.52646400  | -1.32325700 |
| H | 0.71722100  | 3.82447800  | 1.33448800  |
| H | -0.71463700 | 3.76639700  | -1.35669200 |
| H | -1.50337900 | 2.60460200  | 1.34811800  |
| H | 0.71727500  | -3.82450300 | 1.33444100  |
| H | -0.71468400 | -3.76640500 | -1.35668700 |
| H | -1.50335000 | -2.60460300 | 1.34814100  |
| H | -2.91560600 | -2.54531900 | -1.34902700 |
| H | -3.67433500 | -1.27314900 | 1.32798500  |
| H | -2.89746500 | -0.00002500 | -1.34799600 |
| H | -3.67434600 | 1.27317400  | 1.32794800  |
| H | -2.91558800 | 2.54531200  | -1.34907300 |
| H | 5.13965700  | 1.29037100  | 1.39651800  |
| H | 5.87363700  | 2.50808500  | -1.35511200 |
| H | 5.16420800  | 3.86358300  | 1.33766000  |
| H | 3.64931600  | 3.80597400  | -1.35564600 |
| H | 5.86306300  | 5.05940900  | -1.42958400 |
| H | 7.39148000  | 5.19497400  | 1.25256000  |
| H | 9.11024100  | 3.78962800  | 0.14095700  |
| H | 7.32255900  | 2.56862700  | 1.38125100  |
| H | 9.09146400  | 1.26089600  | 0.19420300  |
| H | 5.86847600  | 0.00001800  | -1.32366300 |
| H | 7.31392500  | -0.00001300 | 1.41547200  |
| H | 8.14633600  | -1.24524900 | -1.29281800 |
| H | 7.32256200  | -2.56864900 | 1.38119500  |
| H | 5.87364200  | -2.50805400 | -1.35516700 |
| H | 5.13965800  | -1.29039900 | 1.39648800  |
| H | 8.17460700  | -3.73676400 | -1.35462600 |
| H | 7.39149500  | -5.19501300 | 1.25243400  |
| H | 5.39083000  | -5.98486700 | -0.00062900 |
| H | 5.16421600  | -3.86361100 | 1.33757500  |
| H | 3.64932200  | -3.80595000 | -1.35572600 |

|    |             |             |             |
|----|-------------|-------------|-------------|
| H  | -3.65453700 | -3.84496300 | 1.31673500  |
| H  | -5.15814000 | -3.84154800 | -1.38280900 |
| H  | -9.10961700 | -3.78763000 | -0.20910000 |
| H  | -7.87902400 | -5.94882400 | 0.18007400  |
| H  | -5.86979300 | -5.08289400 | 1.36187300  |
| H  | -3.43575000 | -5.98217500 | 0.01621900  |
| H  | -1.44339600 | -5.18546200 | 1.24760200  |
| H  | 0.99136100  | -5.97095500 | 0.16344600  |
| H  | 2.96533200  | -5.11088500 | 1.33633200  |
| H  | -8.15465700 | -1.25297900 | 1.25649200  |
| H  | -9.09058900 | 1.25949300  | -0.23642600 |
| H  | -8.18373900 | 3.75458200  | 1.29300300  |
| H  | -7.38484700 | 5.17698400  | -1.32919900 |
| H  | -5.39065800 | 5.98396100  | -0.08098800 |
| H  | -3.43572100 | 5.98217400  | 0.01628700  |
| H  | -1.44334600 | 5.18550500  | 1.24757000  |
| H  | 0.99133100  | 5.97094100  | 0.16353500  |
| H  | 2.96529800  | 5.11084500  | 1.33643400  |
| H  | -5.88559800 | -2.52827200 | 1.32610100  |
| H  | -5.11858800 | -1.27897800 | -1.40339700 |
| H  | -5.88341200 | 0.00002600  | 1.31303800  |
| H  | -5.11858700 | 1.27894100  | -1.40343900 |
| H  | -5.88560800 | 2.52830500  | 1.32602300  |
| H  | -5.15808700 | 3.84150100  | -1.38291200 |
| H  | -3.65457500 | 3.84493600  | 1.31668500  |
| H  | -7.29826000 | -0.00003200 | -1.44128200 |
| H  | -7.31092400 | 2.55445600  | -1.42262600 |
| H  | -7.31093500 | -2.55448100 | -1.42253700 |
| Li | -0.00007300 | -0.00002900 | 2.06954200  |

Graphane-Mg<sup>2+</sup>

|   |            |             |             |
|---|------------|-------------|-------------|
| C | 5.13482000 | -1.27529000 | -0.31183800 |
| C | 5.87616700 | -2.53707500 | 0.19373300  |
| C | 3.68084900 | -1.28187000 | 0.18516400  |
| C | 8.06478000 | -1.26051800 | 0.12038900  |
| C | 7.33662500 | -2.53805400 | -0.32839000 |
| C | 5.15090800 | -3.82311500 | -0.27195100 |
| C | 2.95289700 | -2.55669000 | -0.27103800 |
| C | 8.08941300 | -3.78245800 | 0.17685900  |
| C | 5.90760700 | -5.05827800 | 0.26155700  |
| C | 3.68603500 | -3.83322700 | 0.19948900  |
| C | 1.48660100 | -2.57676300 | 0.20629100  |
| C | 7.36099500 | -5.06810100 | -0.22592400 |
| H | 5.88574600 | -5.07400900 | 1.36795600  |
| C | 2.94518000 | -5.07495900 | -0.31636500 |
| C | 0.74905000 | -1.29727100 | -0.20956200 |
| C | 0.73564700 | -3.82587400 | -0.29684800 |
| H | 7.89133000 | -5.94712600 | 0.19179200  |
| C | 1.48819800 | -5.09005300 | 0.13121600  |
| H | 2.98733200 | -5.09522000 | -1.41292100 |

|   |             |             |             |
|---|-------------|-------------|-------------|
| C | -0.75489300 | -1.31677700 | 0.19555400  |
| C | -0.73481500 | -3.84170700 | 0.15634300  |
| H | 1.00120500  | -5.97227600 | -0.28863000 |
| C | -1.49211400 | -2.57970100 | -0.29218900 |
| C | -1.49029300 | -5.08510000 | -0.32463200 |
| C | -2.95450400 | -2.56671000 | 0.18733100  |
| C | -2.94321500 | -5.08804400 | 0.13759500  |
| H | -1.44246200 | -5.12761100 | -1.42233200 |
| C | -3.67558800 | -1.27558200 | -0.23714800 |
| C | -3.69076800 | -3.82746400 | -0.32100400 |
| H | -3.44280100 | -5.98410700 | -0.24185100 |
| C | -5.12865400 | -1.27781300 | 0.26532200  |
| C | -5.14771900 | -3.82897700 | 0.17411200  |
| C | -5.87523900 | -2.53169600 | -0.25532300 |
| C | -5.91294500 | -5.05104300 | -0.37691800 |
| C | -7.33091900 | -2.54093800 | 0.27956000  |
| H | -5.40723700 | -5.99035300 | -0.08060400 |
| C | -7.35931000 | -5.07023600 | 0.13009300  |
| C | -8.09049600 | -3.77622700 | -0.23849400 |
| C | -8.06320700 | -1.25837800 | -0.14697700 |
| H | -7.89593000 | -5.93987300 | -0.29969300 |
| C | -8.09051400 | 3.77625600  | -0.23784900 |
| C | -8.06321300 | 1.25839000  | -0.14676100 |
| C | -7.35930900 | 5.07020500  | 0.13091100  |
| C | -7.33092000 | 2.54088100  | 0.27997400  |
| C | -7.31939100 | -0.00003200 | 0.32927300  |
| C | -5.91296600 | 5.05108900  | -0.37616300 |
| H | -7.89594400 | 5.93991200  | -0.29871600 |
| C | -5.87525600 | 2.53172300  | -0.25495300 |
| C | -5.86490200 | 0.00001200  | -0.20605800 |
| C | -5.14772000 | 3.82894000  | 0.17464400  |
| H | -5.90670900 | 5.04015800  | -1.48349700 |
| C | -5.12865500 | 1.27777100  | 0.26549700  |
| C | -3.69080400 | 3.82749200  | -0.32056100 |
| C | -3.67559800 | 1.27561500  | -0.23699900 |
| C | -2.94323800 | 5.08802100  | 0.13812800  |
| C | -2.95449000 | 2.56669300  | 0.18759700  |
| C | -2.95818700 | -0.00000500 | 0.26064700  |
| C | -1.49037200 | 5.08515300  | -0.32427600 |
| H | -3.44290000 | 5.98412800  | -0.24111500 |
| C | -1.49214200 | 2.57973700  | -0.29201800 |
| C | -1.49545300 | 0.00001500  | -0.19008800 |
| C | -0.73478600 | 3.84173100  | 0.15646200  |
| H | -1.44267400 | 5.12780400  | -1.42197800 |
| C | -0.75484800 | 1.31679900  | 0.19561600  |
| C | 0.73561900  | 3.82590200  | -0.29695600 |
| C | 0.74903300  | 1.29730800  | -0.20960200 |
| C | 1.48826600  | 5.09010600  | 0.13087800  |
| C | 1.48663800  | 2.57680600  | 0.20614900  |
| C | 1.51020100  | 0.00002600  | 0.19274500  |



|   |             |             |             |
|---|-------------|-------------|-------------|
| C | 2.94521300  | 5.07494100  | -0.31681600 |
| H | 1.00129700  | 5.97228600  | -0.28907200 |
| C | 2.95288900  | 2.55668000  | -0.27128500 |
| C | 2.97004300  | -0.00000300 | -0.29226700 |
| C | 3.68608000  | 3.83324400  | 0.19908100  |
| H | 2.98727600  | 5.09511500  | -1.41337800 |
| C | 3.68086000  | 1.28190500  | 0.18501400  |
| C | 5.15091000  | 3.82307100  | -0.27247900 |
| C | 5.13482400  | 1.27524800  | -0.31201500 |
| C | 5.90764300  | 5.05831800  | 0.26077400  |
| C | 5.87618900  | 2.53709800  | 0.19335400  |
| C | 5.86783200  | 0.00001300  | 0.16985600  |
| C | 7.36100700  | 5.06805100  | -0.22678700 |
| H | 5.40514700  | 5.98934300  | -0.06670900 |
| C | 7.33662900  | 2.53799200  | -0.32882200 |
| C | 7.32564900  | -0.00003400 | -0.35721900 |
| C | 8.08943700  | 3.78247800  | 0.17619100  |
| H | 7.39529100  | 5.19673000  | -1.32645300 |
| C | 8.06479200  | 1.26052800  | 0.12015300  |
| H | -8.22084000 | -3.71702800 | -1.33654300 |
| H | -8.19106300 | -1.23750400 | -1.24661200 |
| H | -9.09224500 | 1.26212300  | 0.26484700  |
| H | -9.11560900 | 3.79167500  | 0.18175900  |
| H | 8.20741600  | 3.74398200  | 1.27604400  |
| H | 9.09835200  | 1.26108800  | -0.28048200 |
| H | 8.18001000  | -1.24867700 | 1.22078600  |
| H | 9.11909800  | -3.79150400 | -0.23195900 |
| H | -0.87604900 | 1.55400400  | 1.32263300  |
| H | -0.87620000 | -1.55403600 | 1.32255300  |
| H | 1.76557200  | 0.00008800  | 1.32398300  |
| H | -1.47564700 | 0.00005800  | -1.29082100 |
| H | 0.72683800  | 1.25854000  | -1.30964500 |
| H | 0.72690400  | -1.25855600 | -1.30960600 |
| H | -1.48173200 | 2.53263300  | -1.39410100 |
| H | -2.93735100 | 2.61385300  | 1.29175500  |
| H | -3.67535500 | 1.23509500  | -1.34338500 |
| H | -2.97570700 | -0.00007100 | 1.37141600  |
| H | -3.67532100 | -1.23494000 | -1.34353000 |
| H | -2.93741700 | -2.61399700 | 1.29148500  |
| H | -1.48160900 | -2.53257200 | -1.39426900 |
| H | -0.74595900 | -3.85572700 | 1.26326800  |
| H | 0.74580300  | -3.78173600 | -1.39936600 |
| H | 1.50109200  | -2.62085200 | 1.31896200  |
| H | -0.74575200 | 3.85567700  | 1.26339000  |
| H | 0.74560800  | 3.78168900  | -1.39947400 |
| H | 1.50122000  | 2.62093700  | 1.31881100  |
| H | 2.93081700  | 2.56442900  | -1.37282100 |
| H | 3.68390300  | 1.26684700  | 1.29642400  |
| H | 2.92248300  | -0.00007300 | -1.39151400 |
| H | 3.68386600  | -1.26669700 | 1.29657200  |

|    |             |             |             |
|----|-------------|-------------|-------------|
| H  | 2.93088200  | -2.56454400 | -1.37257400 |
| H  | -5.13379800 | -1.30335400 | 1.38111800  |
| H  | -5.91277400 | -2.49470900 | -1.37044500 |
| H  | -5.15482000 | -3.89041400 | 1.28972800  |
| H  | -3.68070200 | -3.79087200 | -1.42685100 |
| H  | -5.90664400 | -5.03993900 | -1.48425000 |
| H  | -7.38017100 | -5.22180000 | 1.22673100  |
| H  | -9.11561000 | -3.79171100 | 0.18106400  |
| H  | -7.30402200 | -2.58639200 | 1.39542600  |
| H  | -9.09224400 | -1.26217800 | 0.26461600  |
| H  | -5.90576800 | 0.00008900  | -1.32237100 |
| H  | -7.29446400 | -0.00012800 | 1.44610100  |
| H  | -8.19108600 | 1.23769600  | -1.24639800 |
| H  | -7.30399000 | 2.58614800  | 1.39584700  |
| H  | -5.91282300 | 2.49489500  | -1.37007800 |
| H  | -5.13378000 | 1.30315200  | 1.38129700  |
| H  | -8.22090900 | 3.71723300  | -1.33590100 |
| H  | -7.38012500 | 5.22159800  | 1.22757400  |
| H  | -5.40724000 | 5.99035000  | -0.07972300 |
| H  | -5.15475500 | 3.89020900  | 1.29026700  |
| H  | -3.68080700 | 3.79101400  | -1.42641200 |
| H  | 3.66065400  | 3.83986900  | 1.30655200  |
| H  | 5.17268400  | 3.85882800  | -1.38998000 |
| H  | 9.11911000  | 3.79145100  | -0.23265700 |
| H  | 7.89136400  | 5.94715000  | 0.19074200  |
| H  | 5.88584000  | 5.07424200  | 1.36717100  |
| H  | 3.44135200  | 5.98605300  | 0.03040900  |
| H  | 1.43180600  | 5.18539000  | 1.22575000  |
| H  | -0.99955700 | 5.98532800  | 0.05028100  |
| H  | -2.97508100 | 5.15422600  | 1.23377700  |
| H  | 8.18005300  | 1.24887600  | 1.22055000  |
| H  | 9.09834900  | -1.26114700 | -0.28022200 |
| H  | 8.20735700  | -3.74377500 | 1.27670700  |
| H  | 7.39534100  | -5.19698000 | -1.32556500 |
| H  | 5.40512500  | -5.98935900 | -0.06578700 |
| H  | 3.44126000  | -5.98605700 | 0.03098100  |
| H  | 1.43165600  | -5.18516700 | 1.22609800  |
| H  | -0.99947100 | -5.98530400 | 0.04986500  |
| H  | -2.97519700 | -5.15441300 | 1.23322900  |
| H  | 5.90388500  | 2.52289000  | 1.30828200  |
| H  | 5.13952900  | 1.28837900  | -1.42994500 |
| H  | 5.90228500  | 0.00008700  | 1.28495500  |
| H  | 5.13955200  | -1.28858900 | -1.42976500 |
| H  | 5.90381600  | -2.52270700 | 1.30865900  |
| H  | 5.17277200  | -3.85904900 | -1.38944700 |
| H  | 3.66051600  | -3.83976800 | 1.30695900  |
| H  | 7.30574900  | -0.00013900 | -1.47493600 |
| H  | 7.31859200  | -2.56743600 | -1.44559000 |
| H  | 7.31855500  | 2.56718500  | -1.44602500 |
| Mg | -0.01532000 | -0.00009300 | 1.83391600  |

Graphane-Na<sup>+</sup>

|   |             |             |             |
|---|-------------|-------------|-------------|
| C | -5.12377300 | 1.27177400  | -0.33219700 |
| C | -5.85650700 | 2.53477300  | 0.18116400  |
| C | -3.65733100 | 1.27321300  | 0.13744800  |
| C | -8.04802000 | 1.26109600  | 0.17049700  |
| C | -7.32828800 | 2.53446200  | -0.30517100 |
| C | -5.14091700 | 3.81682500  | -0.30899900 |
| C | -2.94163900 | 2.54734800  | -0.33415700 |
| C | -8.06946600 | 3.78419000  | 0.20642300  |
| C | -5.88634300 | 5.05845800  | 0.22543100  |
| C | -3.66744000 | 3.82266300  | 0.14022600  |
| C | -1.47381100 | 2.55133100  | 0.12895500  |
| C | -7.35027400 | 5.06516000  | -0.22959700 |
| H | -5.83759100 | 5.08457900  | 1.33034100  |
| C | -2.93255900 | 5.06384400  | -0.38245200 |
| C | -0.73461400 | 1.27768300  | -0.31238900 |
| C | -0.72523900 | 3.81249200  | -0.33509200 |
| H | -7.86984900 | 5.94938300  | 0.18675700  |
| C | -1.48098900 | 5.07843500  | 0.07854900  |
| H | -2.96411900 | 5.06940100  | -1.48023100 |
| C | 0.73681300  | 1.27906900  | 0.14046500  |
| C | 0.72626100  | 3.81285000  | 0.16841100  |
| H | -0.98780200 | 5.96159500  | -0.33508800 |
| C | 1.47916000  | 2.55447200  | -0.29447800 |
| C | 1.48428800  | 5.07872500  | -0.24157300 |
| C | 2.93969900  | 2.54807400  | 0.19037100  |
| C | 2.93063300  | 5.06596200  | 0.23582700  |
| H | 1.45488000  | 5.17124600  | -1.33766000 |
| C | 3.66307700  | 1.27354000  | -0.26996900 |
| C | 3.67346500  | 3.82342900  | -0.27294400 |
| H | 3.43531100  | 5.98078500  | -0.09354100 |
| C | 5.11901100  | 1.27217400  | 0.23403900  |
| C | 5.13852700  | 3.81833800  | 0.20411900  |
| C | 5.86196100  | 2.53404000  | -0.26828600 |
| C | 5.89380900  | 5.05673900  | -0.32417100 |
| C | 7.32520100  | 2.53501900  | 0.24283400  |
| H | 5.38798900  | 5.98386400  | 0.00705300  |
| C | 7.34950800  | 5.06608600  | 0.15621300  |
| C | 8.07528400  | 3.78263700  | -0.26111400 |
| C | 8.05227500  | 1.26054700  | -0.21813900 |
| H | 7.87612800  | 5.94752800  | -0.25764500 |
| C | 8.07530200  | -3.78249100 | -0.26175700 |
| C | 8.05227900  | -1.26040700 | -0.21836200 |
| C | 7.34956200  | -5.06601100 | 0.15541500  |
| C | 7.32522600  | -2.53495900 | 0.24241600  |
| C | 7.31494500  | 0.00002700  | 0.26464700  |
| C | 5.89383700  | -5.05661100 | -0.32489000 |
| H | 7.87617000  | -5.94738600 | -0.25860200 |
| C | 5.86197200  | -2.53391700 | -0.26866300 |

|   |             |             |             |
|---|-------------|-------------|-------------|
| C | 5.85451900  | 0.00006300  | -0.25061800 |
| C | 5.13857200  | -3.81828400 | 0.20360100  |
| H | 5.86484600  | -5.07428500 | -1.43127000 |
| C | 5.11902300  | -1.27212600 | 0.23385000  |
| C | 3.67348500  | -3.82334600 | -0.27337800 |
| C | 3.66308700  | -1.27342800 | -0.27015300 |
| C | 2.93070100  | -5.06590600 | 0.23540700  |
| C | 2.93973000  | -2.54802400 | 0.19003900  |
| C | 2.93445900  | 0.00002000  | 0.19612500  |
| C | 1.48430400  | -5.07867500 | -0.24183600 |
| H | 3.43535800  | -5.98071000 | -0.09404400 |
| C | 1.47918100  | -2.55441700 | -0.29477500 |
| C | 1.47682100  | 0.00005200  | -0.28458300 |
| C | 0.72631900  | -3.81278900 | 0.16819700  |
| H | 1.45476500  | -5.17122900 | -1.33791600 |
| C | 0.73685300  | -1.27904300 | 0.14025600  |
| C | -0.72525300 | -3.81242300 | -0.33510100 |
| C | -0.73463400 | -1.27760500 | -0.31236000 |
| C | -1.48095300 | -5.07837200 | 0.07861500  |
| C | -1.47378100 | -2.55126400 | 0.12903900  |
| C | -1.47583400 | 0.00006400  | 0.11512300  |
| C | -2.93259200 | -5.06379300 | -0.38216900 |
| H | -0.98783100 | -5.96151900 | -0.33512200 |
| C | -2.94164900 | -2.54729700 | -0.33395200 |
| C | -2.94064800 | 0.00002700  | -0.34481300 |
| C | -3.66741800 | -3.82258900 | 0.14053700  |
| H | -2.96431000 | -5.06941100 | -1.47994300 |
| C | -3.65731800 | -1.27312200 | 0.13757900  |
| C | -5.14092100 | -3.81678100 | -0.30859700 |
| C | -5.12376700 | -1.27173400 | -0.33204200 |
| C | -5.88631700 | -5.05836000 | 0.22600100  |
| C | -5.85649200 | -2.53468000 | 0.18146200  |
| C | -5.84970500 | 0.00004900  | 0.16750200  |
| C | -7.35027100 | -5.06512200 | -0.22895400 |
| H | -5.38662500 | -5.98283000 | -0.12243900 |
| C | -7.32828100 | -2.53442600 | -0.30484800 |
| C | -7.31880600 | 0.00001500  | -0.32309900 |
| C | -8.06945500 | -3.78409300 | 0.20689900  |
| H | -7.40526100 | -5.17459900 | -1.32947500 |
| C | -8.04801000 | -1.26100400 | 0.17067300  |
| H | 8.17541000  | 3.74943100  | -1.36290000 |
| H | 8.14508100  | 1.25111100  | -1.32070800 |
| H | 9.08952000  | -1.25964200 | 0.16666700  |
| H | 9.10820500  | -3.78768400 | 0.13426300  |
| H | -8.15200800 | -3.75581100 | 1.30985200  |
| H | -9.09094900 | -1.25985100 | -0.19926400 |
| H | -8.12417600 | 1.25349900  | 1.27381400  |
| H | -9.10853800 | 3.78805800  | -0.17364700 |
| H | 0.75788600  | -1.33787900 | 1.25807500  |
| H | 0.75764000  | 1.33772400  | 1.25830900  |

|   |             |             |             |
|---|-------------|-------------|-------------|
| H | -1.56134700 | 0.00023300  | 1.23211400  |
| H | 1.49449000  | 0.00013200  | -1.38822400 |
| H | -0.72050500 | -1.27309000 | -1.41567100 |
| H | -0.72016800 | 1.27325500  | -1.41569700 |
| H | 1.49552300  | -2.55871100 | -1.39932000 |
| H | 2.91949500  | -2.55461700 | 1.29525100  |
| H | 3.66697300  | -1.26646700 | -1.37857900 |
| H | 2.92010200  | -0.00005300 | 1.30465100  |
| H | 3.66697300  | 1.26672800  | -1.37839700 |
| H | 2.91945900  | 2.55456400  | 1.29557800  |
| H | 1.49556600  | 2.55877800  | -1.39902600 |
| H | 0.69440100  | 3.78881900  | 1.27467500  |
| H | -0.69509100 | 3.78375900  | -1.43833800 |
| H | -1.48653800 | 2.56763800  | 1.24063700  |
| H | 0.69459700  | -3.78873500 | 1.27447200  |
| H | -0.69524800 | -3.78365300 | -1.43834800 |
| H | -1.48642300 | -2.56760300 | 1.24074100  |
| H | -2.93522600 | -2.54965000 | -1.43655600 |
| H | -3.64002800 | -1.26707200 | 1.24935900  |
| H | -2.93221100 | -0.00003100 | -1.44647600 |
| H | -3.64006900 | 1.26726200  | 1.24922700  |
| H | -2.93516100 | 2.54962900  | -1.43676100 |
| H | 5.11877900  | 1.28146000  | 1.34980500  |
| H | 5.87809000  | 2.52231000  | -1.38395200 |
| H | 5.15585800  | 3.84755500  | 1.32025800  |
| H | 3.65452900  | 3.83262100  | -1.38025800 |
| H | 5.86487700  | 5.07455600  | -1.43055100 |
| H | 7.38645200  | 5.18218800  | 1.25640300  |
| H | 9.10816600  | 3.78778300  | 0.13496000  |
| H | 7.31411800  | 2.55748200  | 1.35944100  |
| H | 9.08950800  | 1.25972900  | 0.16690900  |
| H | 5.87464700  | 0.00014800  | -1.36665600 |
| H | 7.30274900  | -0.00007000 | 1.38160900  |
| H | 8.14506500  | -1.25078600 | -1.32093100 |
| H | 7.31417400  | -2.55760500 | 1.35902000  |
| H | 5.87806500  | -2.52203900 | -1.38432800 |
| H | 5.11879900  | -1.28157200 | 1.34961400  |
| H | 8.17537300  | -3.74911900 | -1.36354200 |
| H | 7.38656500  | -5.18227800 | 1.25558600  |
| H | 5.38804100  | -5.98378200 | 0.00624200  |
| H | 5.15596100  | -3.84764800 | 1.31973600  |
| H | 3.65447800  | -3.83249300 | -1.38069100 |
| H | -3.62888900 | -3.83477900 | 1.24861400  |
| H | -5.17744200 | -3.84035000 | -1.42514500 |
| H | -9.10852400 | -3.78800800 | -0.17318500 |
| H | -7.86982300 | -5.94928400 | 0.18756200  |
| H | -5.83751000 | -5.08436400 | 1.33091100  |
| H | -3.43345900 | -5.97987300 | -0.05024800 |
| H | -1.44045500 | -5.17668100 | 1.17479200  |
| H | 0.98613400  | -5.96285700 | 0.16365400  |

|    |             |             |             |
|----|-------------|-------------|-------------|
| H  | 2.94987600  | -5.07701100 | 1.33409000  |
| H  | -8.12414800 | -1.25326400 | 1.27398900  |
| H  | -9.09095300 | 1.25989300  | -0.19945600 |
| H  | -8.15200200 | 3.75604900  | 1.30938200  |
| H  | -7.40521000 | 5.17446500  | -1.33013800 |
| H  | -5.38663500 | 5.98289300  | -0.12308000 |
| H  | -3.43347600 | 5.97994200  | -0.05065300 |
| H  | -1.44066000 | 5.17671000  | 1.17473300  |
| H  | 0.98606600  | 5.96291900  | 0.16382900  |
| H  | 2.94969700  | 5.07702200  | 1.33451300  |
| H  | -5.85370900 | -2.52647200 | 1.29652100  |
| H  | -5.14460400 | -1.27875900 | -1.44894100 |
| H  | -5.85104100 | 0.00011900  | 1.28278100  |
| H  | -5.14460100 | 1.27867600  | -1.44909400 |
| H  | -5.85374800 | 2.52668100  | 1.29622500  |
| H  | -5.17737600 | 3.84028000  | -1.42555000 |
| H  | -3.62898400 | 3.83489400  | 1.24830400  |
| H  | -7.32410900 | -0.00006000 | -1.44064100 |
| H  | -7.33503100 | 2.55349100  | -1.42232300 |
| H  | -7.33504100 | -2.55358300 | -1.42200000 |
| Na | -0.04339500 | -0.00178300 | 2.74535300  |

Graphane-NH<sub>4</sub><sup>+</sup>

|   |             |             |             |
|---|-------------|-------------|-------------|
| C | 5.11248300  | -1.25572200 | -0.33828200 |
| C | 5.84369200  | -2.51109200 | 0.19486200  |
| C | 3.64325100  | -1.24977700 | 0.12167400  |
| C | 8.03582100  | -1.23603300 | 0.16617400  |
| C | 7.31712800  | -2.51774000 | -0.28747900 |
| C | 5.13224200  | -3.80047700 | -0.28215800 |
| C | 2.93310200  | -2.53091900 | -0.33907500 |
| C | 8.05697600  | -3.75850500 | 0.24730400  |
| C | 5.87391100  | -5.03408800 | 0.27555400  |
| C | 3.65487700  | -3.80209800 | 0.15195000  |
| C | 1.46083800  | -2.53165200 | 0.10673400  |
| C | 7.34060900  | -5.04696900 | -0.17073400 |
| H | 5.81906000  | -5.04452700 | 1.38013200  |
| C | 2.92451700  | -5.04881700 | -0.36390900 |
| C | 0.72025100  | -1.25690900 | -0.33287700 |
| C | 0.71434400  | -3.79841300 | -0.34265700 |
| H | 7.85850400  | -5.92395600 | 0.26278400  |
| C | 1.46917400  | -5.06003300 | 0.08515900  |
| H | 2.96491800  | -5.06462700 | -1.46106000 |
| C | -0.75301400 | -1.25984400 | 0.11772400  |
| C | -0.74059800 | -3.79288700 | 0.15028800  |
| H | 0.97891400  | -5.94673100 | -0.32383000 |
| C | -1.48861700 | -2.53543100 | -0.32326600 |
| C | -1.49228600 | -5.06377400 | -0.25688700 |
| C | -2.95347300 | -2.53306800 | 0.14778700  |
| C | -2.94629400 | -5.04866100 | 0.19660100  |
| H | -1.44659600 | -5.16477900 | -1.35159500 |

|   |             |             |             |
|---|-------------|-------------|-------------|
| C | -3.67211800 | -1.25390200 | -0.30851800 |
| C | -3.68063100 | -3.80709600 | -0.32781400 |
| H | -3.44469700 | -5.96549600 | -0.13706600 |
| C | -5.13084900 | -1.26140200 | 0.18809200  |
| C | -5.15376800 | -3.80595000 | 0.12336700  |
| C | -5.86942200 | -2.51427000 | -0.34127000 |
| C | -5.90041800 | -5.03583600 | -0.43651800 |
| C | -7.33900100 | -2.52328200 | 0.15137800  |
| H | -5.40019300 | -5.96826900 | -0.11235900 |
| C | -7.36400800 | -5.05226200 | 0.01952500  |
| C | -8.08238600 | -3.76083900 | -0.38625300 |
| C | -8.05965400 | -1.23904700 | -0.29204600 |
| H | -7.88427000 | -5.92553800 | -0.41885000 |
| C | -8.08121400 | 3.80585400  | -0.18531600 |
| C | -8.05971900 | 1.28270600  | -0.22371300 |
| C | -7.35730400 | 5.07365500  | 0.28069900  |
| C | -7.33562400 | 2.54174200  | 0.28286100  |
| C | -7.32712700 | 0.00873000  | 0.22981300  |
| C | -5.89839100 | 5.07955900  | -0.18994900 |
| H | -7.88047700 | 5.96924800  | -0.10593500 |
| C | -5.86928500 | 2.55598600  | -0.21833300 |
| C | -5.86282300 | 0.02099500  | -0.27372800 |
| C | -5.14656800 | 3.82326500  | 0.29947900  |
| H | -5.86192300 | 5.13591600  | -1.29477100 |
| C | -5.12926900 | 1.27909700  | 0.24819000  |
| C | -3.68010400 | 3.84108500  | -0.17389700 |
| C | -3.67209500 | 1.29432000  | -0.25300800 |
| C | -2.93414600 | 5.06554900  | 0.37167400  |
| C | -2.94750300 | 2.55196400  | 0.24982700  |
| C | -2.94308400 | 0.01046200  | 0.17936500  |
| C | -1.49561700 | 5.09518700  | -0.12760500 |
| H | -3.44388500 | 5.99191800  | 0.08419000  |
| C | -1.48949000 | 2.56725800  | -0.24143200 |
| C | -1.48698700 | 0.01996200  | -0.30757200 |
| C | -0.72893200 | 3.81835100  | 0.22887500  |
| H | -1.48590700 | 5.22359800  | -1.22064400 |
| C | -0.74085000 | 1.28224400  | 0.15328000  |
| C | 0.70407800  | 3.82849800  | -0.32639100 |
| C | 0.71702000  | 1.29462400  | -0.33991000 |
| C | 1.47047600  | 5.09346500  | 0.06963400  |
| C | 1.46342600  | 2.56338600  | 0.10517500  |
| C | 1.46284900  | 0.02313200  | 0.08899600  |
| C | 2.90953200  | 5.07918300  | -0.42944100 |
| H | 0.96568600  | 5.97741900  | -0.32860000 |
| C | 2.92409200  | 2.56329400  | -0.37910800 |
| C | 2.92540900  | 0.01712000  | -0.37381500 |
| C | 3.65510900  | 3.84015400  | 0.08200300  |
| H | 2.91329300  | 5.07861500  | -1.52775600 |
| C | 3.64495600  | 1.29363400  | 0.09547100  |
| C | 5.12305500  | 3.83214100  | -0.38602900 |

|   |             |             |             |
|---|-------------|-------------|-------------|
| C | 5.11064300  | 1.28726300  | -0.37640300 |
| C | 5.87278300  | 5.08234500  | 0.12105300  |
| C | 5.84439700  | 2.55788800  | 0.11625300  |
| C | 5.83767400  | 0.02377900  | 0.14204700  |
| C | 7.33302700  | 5.08181700  | -0.34543600 |
| H | 5.36969500  | 6.00038700  | -0.23978700 |
| C | 7.31346300  | 2.55062300  | -0.37750300 |
| C | 7.30625900  | 0.01577100  | -0.35034700 |
| C | 8.05664000  | 3.80943300  | 0.10808400  |
| H | 7.37910400  | 5.17122500  | -1.44822000 |
| C | 8.03633000  | 1.28602300  | 0.11737700  |
| H | -8.16536200 | -3.70760700 | -1.48865500 |
| H | -8.13658300 | -1.20449000 | -1.39523400 |
| H | -9.10068000 | 1.27148700  | 0.15044000  |
| H | -9.11712400 | 3.79886800  | 0.20231000  |
| H | 8.14602900  | 3.80065300  | 1.21075100  |
| H | 9.07742100  | 1.27920800  | -0.25790500 |
| H | 8.11275900  | -1.20835300 | 1.26889600  |
| H | 9.09743500  | -3.76781000 | -0.12950100 |
| H | -0.71484100 | 1.26511800  | 1.26959400  |
| H | -0.78186600 | -1.27944800 | 1.22921700  |
| H | 1.51554800  | 0.05346900  | 1.19937100  |
| H | -1.50542500 | 0.03664000  | -1.41164100 |
| H | 0.68581800  | 1.29785300  | -1.44338800 |
| H | 0.71128200  | -1.26467300 | -1.43624100 |
| H | -1.51956600 | 2.59491600  | -1.34620500 |
| H | -2.92557400 | 2.52146500  | 1.35356500  |
| H | -3.67388700 | 1.32285400  | -1.36135100 |
| H | -2.91988600 | -0.01211000 | 1.28460400  |
| H | -3.66927000 | -1.23764400 | -1.41691400 |
| H | -2.94285900 | -2.54437600 | 1.25282800  |
| H | -1.49601000 | -2.54627000 | -1.42793300 |
| H | -0.71650400 | -3.76136800 | 1.25810500  |
| H | 0.69105600  | -3.77614800 | -1.44572600 |
| H | 1.48304500  | -2.56638800 | 1.22630900  |
| H | -0.65919600 | 3.76796900  | 1.33140800  |
| H | 0.63436500  | 3.80976100  | -1.42821600 |
| H | 1.49210000  | 2.56186100  | 1.21389100  |
| H | 2.90692200  | 2.55913800  | -1.48159900 |
| H | 3.62964100  | 1.29567300  | 1.20740200  |
| H | 2.92126200  | 0.00494800  | -1.47543700 |
| H | 3.61862700  | -1.23330700 | 1.23518000  |
| H | 2.93151100  | -2.54351600 | -1.44115200 |
| H | -5.13534600 | -1.29101000 | 1.30348800  |
| H | -5.87129900 | -2.48648600 | -1.45669200 |
| H | -5.19067400 | -3.85122900 | 1.23841100  |
| H | -3.64213000 | -3.81803600 | -1.43453800 |
| H | -5.85379700 | -5.03552700 | -1.54249000 |
| H | -7.41917300 | -5.18789400 | 1.11665300  |
| H | -9.12128200 | -3.77188600 | -0.00650400 |



|                                        |             |             |             |
|----------------------------------------|-------------|-------------|-------------|
| H                                      | -7.34181900 | -2.56765000 | 1.26741100  |
| H                                      | -9.10206500 | -1.24571800 | 0.07829300  |
| H                                      | -5.87338200 | 0.04779800  | -1.38939400 |
| H                                      | -7.32363100 | -0.02096700 | 1.34649200  |
| H                                      | -8.14056500 | 1.30612400  | -1.32690700 |
| H                                      | -7.33191100 | 2.52825700  | 1.39963900  |
| H                                      | -5.87809500 | 2.58002300  | -1.33386500 |
| H                                      | -5.12998800 | 1.25639000  | 1.36372600  |
| H                                      | -8.17192900 | 3.80950600  | -1.28835000 |
| H                                      | -7.40115400 | 5.15147500  | 1.38398100  |
| H                                      | -5.39369800 | 5.99389700  | 0.17676800  |
| H                                      | -5.16662500 | 3.81531000  | 1.41571000  |
| H                                      | -3.66005300 | 3.88546800  | -1.28063800 |
| H                                      | 3.63176100  | 3.85423200  | 1.19060900  |
| H                                      | 5.14584000  | 3.83921600  | -1.50297300 |
| H                                      | 9.09319900  | 3.80796400  | -0.27876700 |
| H                                      | 7.85508700  | 5.97388000  | 0.05054300  |
| H                                      | 5.83215600  | 5.12814300  | 1.22557900  |
| H                                      | 3.41856600  | 5.99711600  | -0.11500500 |
| H                                      | 1.46045900  | 5.18975300  | 1.16666600  |
| H                                      | -0.99023100 | 5.96668200  | 0.29713400  |
| H                                      | -2.93713900 | 5.03422100  | 1.47014800  |
| H                                      | 8.11812900  | 1.29871100  | 1.22009200  |
| H                                      | 9.07882500  | -1.24082300 | -0.20412600 |
| H                                      | 8.13666100  | -3.71226900 | 1.34968900  |
| H                                      | 7.40192300  | -5.17478000 | -1.26911300 |
| H                                      | 5.37697200  | -5.96374100 | -0.06325500 |
| H                                      | 3.42353400  | -5.96142300 | -0.01983100 |
| H                                      | 1.42028700  | -5.15074000 | 1.18229300  |
| H                                      | -0.99964800 | -5.94494200 | 0.16252600  |
| H                                      | -2.98347700 | -5.05549600 | 1.29504000  |
| H                                      | 5.84766200  | 2.56534600  | 1.23121800  |
| H                                      | 5.12922500  | 1.27799000  | -1.49332800 |
| H                                      | 5.84086500  | 0.04142000  | 1.25672900  |
| H                                      | 5.13758900  | -1.27880800 | -1.45545000 |
| H                                      | 5.83834500  | -2.48816400 | 1.30916100  |
| H                                      | 5.17888200  | -3.83953500 | -1.39828900 |
| H                                      | 3.60668200  | -3.80395500 | 1.26067300  |
| H                                      | 7.30992300  | -0.00509100 | -1.46781200 |
| H                                      | 7.32643300  | -2.55628400 | -1.40431900 |
| H                                      | 7.31456200  | 2.55020100  | -1.49484100 |
| H                                      | -0.04273000 | -1.26310200 | 3.97420400  |
| N                                      | 0.57561300  | -0.80646200 | 3.29346300  |
| H                                      | 0.06284100  | -0.06851600 | 2.78608500  |
| H                                      | 0.89509000  | -1.49273600 | 2.58639600  |
| H                                      | 1.38905400  | -0.39834400 | 3.76957800  |
| Graphane-NMe <sub>4</sub> <sup>+</sup> |             |             |             |
| C                                      | -5.10807700 | 1.27071500  | -0.61971100 |
| C                                      | -5.83264800 | 2.53709100  | -0.10383800 |

|   |             |             |             |
|---|-------------|-------------|-------------|
| C | -3.63380500 | 1.27358300  | -0.17283600 |
| C | -8.02386600 | 1.26244400  | -0.06594800 |
| C | -7.31313700 | 2.53303900  | -0.56258200 |
| C | -5.12654000 | 3.81453400  | -0.61981100 |
| C | -2.92583600 | 2.54370300  | -0.66627100 |
| C | -8.04487600 | 3.78689900  | -0.04732400 |
| C | -5.86189000 | 5.06197700  | -0.08495700 |
| C | -3.64512200 | 3.82354600  | -0.19715200 |
| C | -1.45620500 | 2.54863200  | -0.21288500 |
| C | -7.33480500 | 5.06371600  | -0.51021600 |
| H | -5.79039900 | 5.10129800  | 1.01795600  |
| C | -2.91544900 | 5.05772500  | -0.74280900 |
| C | -0.71492800 | 1.27363800  | -0.65082900 |
| C | -0.70477000 | 3.80897700  | -0.67179300 |
| H | -7.84634300 | 5.95213700  | -0.09347700 |
| C | -1.46407100 | 5.08030600  | -0.28135900 |
| H | -2.94745900 | 5.04229500  | -1.84048800 |
| C | 0.74634600  | 1.27258000  | -0.16822100 |
| C | 0.73502800  | 3.80763500  | -0.13463900 |
| H | -0.96983600 | 5.95827500  | -0.70582300 |
| C | 1.49333700  | 2.54917600  | -0.58807500 |
| C | 1.49910800  | 5.07830700  | -0.51677800 |
| C | 2.94860300  | 2.54383300  | -0.08783000 |
| C | 2.93762900  | 5.06033000  | -0.01646000 |
| H | 1.48975400  | 5.18315300  | -1.61222900 |
| C | 3.67716500  | 1.27449900  | -0.55451300 |
| C | 3.68592900  | 3.82347200  | -0.53084200 |
| H | 3.44790500  | 5.98012000  | -0.32402600 |
| C | 5.12883700  | 1.27124600  | -0.03516800 |
| C | 5.14877700  | 3.81633800  | -0.04509900 |
| C | 5.87528100  | 2.53593100  | -0.52385800 |
| C | 5.90589700  | 5.05911200  | -0.56043800 |
| C | 7.33620700  | 2.53404800  | -0.00673900 |
| H | 5.39815500  | 5.98312700  | -0.22389200 |
| C | 7.36049400  | 5.06540400  | -0.07650900 |
| C | 8.08766300  | 3.78485800  | -0.50088700 |
| C | 8.06514700  | 1.26167300  | -0.47108100 |
| H | 7.88780200  | 5.94955700  | -0.48335800 |
| C | 8.08761800  | -3.78398400 | -0.50135000 |
| C | 8.06513500  | -1.26080700 | -0.47121700 |
| C | 7.36032900  | -5.06456400 | -0.07728600 |
| C | 7.33611200  | -2.53322800 | -0.00713900 |
| C | 7.32579100  | 0.00041100  | 0.00694200  |
| C | 5.90585400  | -5.05816500 | -0.56157900 |
| H | 7.88771500  | -5.94868600 | -0.48410200 |
| C | 5.87526000  | -2.53497800 | -0.52446500 |
| C | 5.86843700  | 0.00047600  | -0.51641700 |
| C | 5.14862400  | -3.81549100 | -0.04616100 |
| H | 5.88001400  | -5.08424800 | -1.66795400 |
| C | 5.12878800  | -1.27040500 | -0.03553000 |

|   |             |             |             |
|---|-------------|-------------|-------------|
| C | 3.68591100  | -3.82242800 | -0.53231900 |
| C | 3.67715800  | -1.27344500 | -0.55499200 |
| C | 2.93743800  | -5.05951600 | -0.01875200 |
| C | 2.94850100  | -2.54296500 | -0.08893600 |
| C | 2.94201200  | 0.00044100  | -0.10479200 |
| C | 1.49905300  | -5.07720600 | -0.51947300 |
| H | 3.44777000  | -5.97917200 | -0.32661700 |
| C | 1.49331700  | -2.54804400 | -0.58944900 |
| C | 1.48976400  | 0.00056900  | -0.60513800 |
| C | 0.73491500  | -3.80672200 | -0.13682100 |
| H | 1.48999300  | -5.18142900 | -1.61498400 |
| C | 0.74630600  | -1.27167200 | -0.16898500 |
| C | -0.70480100 | -3.80775400 | -0.67420200 |
| C | -0.71496500 | -1.27237300 | -0.65165700 |
| C | -1.46411700 | -5.07931300 | -0.28452300 |
| C | -1.45625800 | -2.54766100 | -0.21463900 |
| C | -1.45205400 | 0.00052900  | -0.20644900 |
| C | -2.91553900 | -5.05642500 | -0.74581800 |
| H | -0.96991600 | -5.95701600 | -0.70958100 |
| C | -2.92591200 | -2.54244800 | -0.66792000 |
| C | -2.91921400 | 0.00064400  | -0.65628300 |
| C | -3.64510700 | -3.82254300 | -0.19935600 |
| H | -2.94766400 | -5.04035300 | -1.84348200 |
| C | -3.63379200 | -1.27260100 | -0.17363200 |
| C | -5.12662900 | -3.81334200 | -0.62160300 |
| C | -5.10811100 | -1.26950200 | -0.62033900 |
| C | -5.86183800 | -5.06098200 | -0.08699400 |
| C | -5.83262200 | -2.53610600 | -0.10494300 |
| C | -5.82616900 | 0.00048900  | -0.10573900 |
| C | -7.33484600 | -5.06259500 | -0.51193100 |
| H | -5.36889300 | -5.98058100 | -0.45758400 |
| C | -7.31318200 | -2.53188800 | -0.56346700 |
| C | -7.30351300 | 0.00057900  | -0.57060400 |
| C | -8.04483000 | -3.78592600 | -0.04849400 |
| H | -7.41144800 | -5.15953500 | -1.61245000 |
| C | -8.02384900 | -1.26145800 | -0.06633400 |
| H | 8.18886200  | 3.75868100  | -1.60280000 |
| H | 8.15826900  | 1.25559600  | -1.57363200 |
| H | 9.10167500  | -1.25880300 | -0.08529200 |
| H | 9.11968000  | -3.78664900 | -0.10383900 |
| H | -8.10472300 | -3.76823700 | 1.05582200  |
| H | -9.07380100 | -1.25853900 | -0.41542300 |
| H | -8.07700200 | 1.25914100  | 1.03827300  |
| H | -9.09112500 | 3.78695000  | -0.40691900 |
| H | 0.72480200  | -1.27257500 | 0.94171100  |
| H | 0.72495900  | 1.27276400  | 0.94250000  |
| H | -1.46895100 | 0.00032200  | 0.90405700  |
| H | 1.52168000  | 0.00088600  | -1.70948800 |
| H | -0.69449200 | -1.26777300 | -1.75584600 |
| H | -0.69448800 | 1.26980300  | -1.75502300 |

|   |             |             |             |
|---|-------------|-------------|-------------|
| H | 1.52780500  | -2.56077400 | -1.69416200 |
| H | 2.91542900  | -2.53579100 | 1.01615700  |
| H | 3.69265700  | -1.27785100 | -1.66344800 |
| H | 2.91080900  | 0.00024300  | 1.00145400  |
| H | 3.69257200  | 1.27934600  | -1.66296900 |
| H | 2.91573500  | 2.53621100  | 1.01725200  |
| H | 1.52762100  | 2.56247500  | -1.69279000 |
| H | 0.67484600  | 3.77403000  | 0.97046300  |
| H | -0.65028900 | 3.77449600  | -1.77392100 |
| H | -1.46998400 | 2.56846200  | 0.89661800  |
| H | 0.67452300  | -3.77371900 | 0.96830200  |
| H | -0.65018800 | -3.77268000 | -1.77630000 |
| H | -1.47010600 | -2.56829900 | 0.89483100  |
| H | -2.93198600 | -2.53175900 | -1.77050700 |
| H | -3.59692100 | -1.27693800 | 0.93829200  |
| H | -2.92438600 | 0.00097500  | -1.75857300 |
| H | -3.59701800 | 1.27716500  | 0.93908700  |
| H | -2.93176100 | 2.53363000  | -1.76887000 |
| H | 5.11563000  | 1.27550000  | 1.08006400  |
| H | 5.89587800  | 2.53251200  | -1.63956200 |
| H | 5.15951200  | 3.83683600  | 1.07078600  |
| H | 3.67518500  | 3.84527000  | -1.63819400 |
| H | 5.87976900  | 5.08545200  | -1.66679900 |
| H | 7.39456300  | 5.17364000  | 1.02436500  |
| H | 9.11979400  | 3.78743800  | -0.10355400 |
| H | 7.32055500  | 2.55052200  | 1.10970700  |
| H | 9.10171900  | 1.25958000  | -0.08524200 |
| H | 5.89387700  | 0.00062800  | -1.63226400 |
| H | 7.30732100  | 0.00034600  | 1.12362400  |
| H | 8.15835000  | -1.25455700 | -1.57375900 |
| H | 7.32030500  | -2.54986000 | 1.10930300  |
| H | 5.89601900  | -2.53126800 | -1.64016300 |
| H | 5.11549800  | -1.27493500 | 1.07970000  |
| H | 8.18900800  | -3.75764300 | -1.60324000 |
| H | 7.39413100  | -5.17292200 | 1.02358400  |
| H | 5.39802400  | -5.98225100 | -0.22537300 |
| H | 5.15907400  | -3.83623500 | 1.06971600  |
| H | 3.67549000  | -3.84370300 | -1.63968200 |
| H | -3.58838900 | -3.84860500 | 0.90844800  |
| H | -5.18279000 | -3.82464500 | -1.73746300 |
| H | -9.09114000 | -3.78585300 | -0.40791700 |
| H | -7.84628700 | -5.95114900 | -0.09535500 |
| H | -5.79011700 | -5.10065100 | 1.01589100  |
| H | -3.41768300 | -5.97854200 | -0.43153800 |
| H | -1.42777900 | -5.19536500 | 0.81056500  |
| H | 0.99332100  | -5.95818200 | -0.11484900 |
| H | 2.93839000  | -5.05451300 | 1.08055700  |
| H | -8.07690100 | -1.25853600 | 1.03789200  |
| H | -9.07379100 | 1.25966700  | -0.41512000 |
| H | -8.10495100 | 3.76884800  | 1.05697900  |

|   |             |             |             |
|---|-------------|-------------|-------------|
| H | -7.41116500 | 5.16099300  | -1.61072200 |
| H | -5.36888400 | 5.98170700  | -0.45514600 |
| H | -3.41759800 | 5.97967200  | -0.42804100 |
| H | -1.42782600 | 5.19565300  | 0.81380200  |
| H | 0.99350300  | 5.95906400  | -0.11152000 |
| H | 2.93888700  | 5.05478500  | 1.08284200  |
| H | -5.80849800 | -2.53866500 | 1.00936200  |
| H | -5.14419200 | -1.27035100 | -1.73705200 |
| H | -5.80691800 | 0.00021900  | 1.00863200  |
| H | -5.14403900 | 1.27204800  | -1.73642500 |
| H | -5.80867700 | 2.53913800  | 1.01047300  |
| H | -5.18238000 | 3.82626000  | -1.73568600 |
| H | -3.58868500 | 3.84901900  | 0.91067100  |
| H | -7.32744700 | 0.00075000  | -1.68808300 |
| H | -7.34002600 | 2.54403600  | -1.67966700 |
| H | -7.34023700 | -2.54254000 | -1.68055100 |
| N | -0.20229000 | -0.00623900 | 4.22735600  |
| C | -0.86519300 | 1.22125100  | 3.67846200  |
| H | -0.37498600 | 2.10143400  | 4.09740700  |
| H | -0.76413600 | 1.21557000  | 2.59172100  |
| H | -1.92040700 | 1.20519000  | 3.95628700  |
| C | 1.24229600  | -0.01035600 | 3.82652200  |
| H | 1.71365900  | -0.91031600 | 4.22440300  |
| H | 1.30318800  | -0.00449800 | 2.73611100  |
| H | 1.72154100  | 0.88091700  | 4.23445400  |
| C | -0.87433000 | -1.22557800 | 3.67151400  |
| H | -0.39111200 | -2.11185600 | 4.08568700  |
| H | -1.92950500 | -1.20299400 | 3.94910500  |
| H | -0.77300400 | -1.21482700 | 2.58486000  |
| C | -0.31046300 | -0.01019700 | 5.71992000  |
| H | 0.18196700  | 0.88139600  | 6.11035900  |
| H | -1.36602700 | -0.00714400 | 5.99506900  |
| H | 0.17536600  | -0.90769100 | 6.10508300  |

Graphane-OH<sub>3</sub><sup>+</sup>

|   |             |            |             |
|---|-------------|------------|-------------|
| C | -5.10743400 | 1.30624100 | -0.32699600 |
| C | -5.82835000 | 2.57076000 | 0.19896200  |
| C | -3.63321100 | 1.30837500 | 0.11613500  |
| C | -8.02009700 | 1.29776600 | 0.23581300  |
| C | -7.30989500 | 2.57078800 | -0.25591000 |
| C | -5.12027200 | 3.85016300 | -0.30954800 |
| C | -2.92015600 | 2.57887300 | -0.36717500 |
| C | -8.03835000 | 3.82200100 | 0.26948500  |
| C | -5.85370200 | 5.09442500 | 0.23463300  |
| C | -3.63898100 | 3.85548500 | 0.11429900  |
| C | -1.45017100 | 2.57816300 | 0.08807700  |
| C | -7.32760200 | 5.10075000 | -0.18676300 |
| H | -5.77924800 | 5.12781900 | 1.33792100  |
| C | -2.90688600 | 5.09200000 | -0.42235400 |
| C | -0.70824500 | 1.30905700 | -0.36443900 |

|   |             |             |             |
|---|-------------|-------------|-------------|
| C | -0.69676100 | 3.84017400  | -0.36338600 |
| H | -7.83659000 | 5.98696800  | 0.23874700  |
| C | -1.45528000 | 5.10841500  | 0.03910000  |
| H | -2.94038100 | 5.08637100  | -1.52015100 |
| C | 0.74955900  | 1.29636300  | 0.12855500  |
| C | 0.74346400  | 3.83353500  | 0.17364800  |
| H | -0.96029500 | 5.98834300  | -0.37964800 |
| C | 1.49960500  | 2.57498000  | -0.28420000 |
| C | 1.50999700  | 5.10176000  | -0.21246500 |
| C | 2.95639000  | 2.56419600  | 0.21145100  |
| C | 2.94905200  | 5.08101200  | 0.28595200  |
| H | 1.49837000  | 5.20588400  | -1.30814000 |
| C | 3.68252300  | 1.29757600  | -0.26623600 |
| C | 3.69469300  | 3.84403900  | -0.23160900 |
| H | 3.45983100  | 5.99991500  | -0.02278500 |
| C | 5.13393000  | 1.28695000  | 0.25125700  |
| C | 5.15710900  | 3.83199500  | 0.25424400  |
| C | 5.88242800  | 2.55319700  | -0.23057900 |
| C | 5.91672300  | 5.07638900  | -0.25307900 |
| C | 7.34226400  | 2.54617900  | 0.28947700  |
| H | 5.41018000  | 5.99918200  | 0.08932300  |
| C | 7.37036900  | 5.07751500  | 0.23395800  |
| C | 8.09673600  | 3.79844700  | -0.19614800 |
| C | 8.07038900  | 1.27511300  | -0.17985700 |
| H | 7.89991300  | 5.96354300  | -0.16582700 |
| C | 8.08543100  | -3.76990100 | -0.24089300 |
| C | 8.06633600  | -1.24710900 | -0.19470500 |
| C | 7.35533300  | -5.05218200 | 0.17247900  |
| C | 7.33425400  | -2.52130500 | 0.25891700  |
| C | 7.32795000  | 0.01242500  | 0.28917500  |
| C | 5.90244300  | -5.04113400 | -0.31697900 |
| H | 7.88331000  | -5.93460200 | -0.23748200 |
| C | 5.87470000  | -2.51754500 | -0.26242100 |
| C | 5.87163500  | 0.01810700  | -0.23747400 |
| C | 5.14617600  | -3.80098100 | 0.20559300  |
| H | 5.88124600  | -5.05929900 | -1.42351800 |
| C | 5.13001300  | -1.25498400 | 0.23459500  |
| C | 3.68486700  | -3.80339800 | -0.28156000 |
| C | 3.67956900  | -1.25082400 | -0.28462900 |
| C | 2.93372800  | -5.04124400 | 0.22757900  |
| C | 2.95159500  | -2.52492900 | 0.17285900  |
| C | 2.94703800  | 0.02096200  | 0.17816700  |
| C | 1.49469000  | -5.05551700 | -0.27121800 |
| H | 3.43936400  | -5.96045600 | -0.08751100 |
| C | 1.49655000  | -2.52521600 | -0.32647800 |
| C | 1.49548800  | 0.03095700  | -0.32315400 |
| C | 0.73335900  | -3.78418000 | 0.11601300  |
| H | 1.48305200  | -5.15425500 | -1.36708800 |
| C | 0.75824600  | -1.24698600 | 0.10282000  |
| C | -0.70321800 | -3.78507900 | -0.42885400 |

|   |             |             |             |
|---|-------------|-------------|-------------|
| C | -0.71345100 | -1.23902400 | -0.35366700 |
| C | -1.46947400 | -5.05876200 | -0.05996500 |
| C | -1.46173700 | -2.52895200 | 0.02600200  |
| C | -1.45454800 | 0.04032800  | 0.07211100  |
| C | -2.92236500 | -5.02455900 | -0.51731300 |
| H | -0.97563400 | -5.92657600 | -0.50335800 |
| C | -2.93509100 | -2.51135000 | -0.40655900 |
| C | -2.92079100 | 0.03662500  | -0.37713500 |
| C | -3.65117200 | -3.79891600 | 0.04877600  |
| H | -2.95907600 | -4.99436100 | -1.61408700 |
| C | -3.63488200 | -1.24022200 | 0.09753200  |
| C | -5.13387900 | -3.77985900 | -0.36261700 |
| C | -5.11052000 | -1.23484300 | -0.33829100 |
| C | -5.86767700 | -5.03067700 | 0.16604200  |
| C | -5.83371500 | -2.50515900 | 0.16955300  |
| C | -5.82457700 | 0.03423300  | 0.18410700  |
| C | -7.34264300 | -5.02557500 | -0.25228200 |
| H | -5.37964300 | -5.94927700 | -0.21389700 |
| C | -7.31616300 | -2.49458500 | -0.28475200 |
| C | -7.30336300 | 0.03783800  | -0.27738700 |
| C | -8.04749400 | -3.75103700 | 0.22370900  |
| H | -7.42600200 | -5.11616500 | -1.35286700 |
| C | -8.02227000 | -1.22635800 | 0.22290700  |
| H | 8.20130900  | 3.77858600  | -1.29764600 |
| H | 8.16805500  | 1.27538800  | -1.28186700 |
| H | 9.10139500  | -1.24916200 | 0.19600500  |
| H | 9.11600200  | -3.77638300 | 0.16140000  |
| H | -8.10557400 | -3.74173300 | 1.32837800  |
| H | -9.07415200 | -1.22001800 | -0.12198800 |
| H | -8.07172700 | 1.28962700  | 1.34037500  |
| H | -9.08578400 | 3.82631000  | -0.08720700 |
| H | 0.79024100  | -1.25267500 | 1.22050900  |
| H | 0.72088900  | 1.28336400  | 1.24035700  |
| H | -1.48479100 | 0.08194100  | 1.18258100  |
| H | 1.52239500  | 0.03678100  | -1.42715000 |
| H | -0.69245600 | -1.23086800 | -1.45637100 |
| H | -0.68542100 | 1.31045300  | -1.46815100 |
| H | 1.52705400  | -2.52556300 | -1.43074100 |
| H | 2.92108500  | -2.52798100 | 1.27702200  |
| H | 3.69421100  | -1.24728400 | -1.39311600 |
| H | 2.91221400  | 0.01537200  | 1.28250200  |
| H | 3.69607600  | 1.30915800  | -1.37487600 |
| H | 2.92961600  | 2.55245000  | 1.31498000  |
| H | 1.53081300  | 2.59126000  | -1.38931300 |
| H | 0.68573000  | 3.80059500  | 1.27705300  |
| H | -0.64393900 | 3.81469900  | -1.46603600 |
| H | -1.45677600 | 2.58091000  | 1.19636600  |
| H | 0.66988000  | -3.76160100 | 1.22259800  |
| H | -0.64614100 | -3.72792500 | -1.52904500 |
| H | -1.51347800 | -2.64413000 | 1.15430700  |

|   |             |             |             |
|---|-------------|-------------|-------------|
| H | -2.93659900 | -2.48784700 | -1.50785800 |
| H | -3.59368300 | -1.25430900 | 1.21301800  |
| H | -2.92656500 | 0.04252700  | -1.47854700 |
| H | -3.59543100 | 1.30262700  | 1.22773400  |
| H | -2.92733400 | 2.57861500  | -1.46975600 |
| H | 5.12134100  | 1.28551700  | 1.36732500  |
| H | 5.90501700  | 2.55590400  | -1.34611900 |
| H | 5.16686200  | 3.84642400  | 1.37080500  |
| H | 3.68318100  | 3.86742000  | -1.33913300 |
| H | 5.89248000  | 5.11014200  | -1.35902700 |
| H | 7.40183800  | 5.17911300  | 1.33571800  |
| H | 9.12765900  | 3.79734400  | 0.20485800  |
| H | 7.32398700  | 2.55693300  | 1.40626700  |
| H | 9.10551100  | 1.26948700  | 0.21041000  |
| H | 5.89994900  | 0.02577100  | -1.35315700 |
| H | 7.30683100  | 0.00628200  | 1.40602800  |
| H | 8.16487400  | -1.23363300 | -1.29659100 |
| H | 7.31509700  | -2.54474900 | 1.37552300  |
| H | 5.89876600  | -2.50566400 | -1.37791600 |
| H | 5.11682900  | -1.26594100 | 1.35057600  |
| H | 8.19230000  | -3.73650900 | -1.34190900 |
| H | 7.38529600  | -5.16741200 | 1.27292600  |
| H | 5.39374900  | -5.96742500 | 0.01165200  |
| H | 5.15614200  | -3.82903800 | 1.32190700  |
| H | 3.67360200  | -3.81781500 | -1.38890700 |
| H | -3.58845700 | -3.83878800 | 1.15655000  |
| H | -5.19903400 | -3.78178700 | -1.47854500 |
| H | -9.09567800 | -3.74621800 | -0.13199500 |
| H | -7.85415700 | -5.91625400 | 0.16109900  |
| H | -5.79288100 | -5.07998000 | 1.26856100  |
| H | -3.42509100 | -5.94869600 | -0.21294100 |
| H | -1.42780100 | -5.19792500 | 1.03226800  |
| H | 0.98673900  | -5.93568900 | 0.13179200  |
| H | 2.93737300  | -5.04338200 | 1.32633700  |
| H | -8.07350200 | -1.22920400 | 1.32743800  |
| H | -9.07134500 | 1.29855500  | -0.11036600 |
| H | -8.09598400 | 3.79749000  | 1.37401500  |
| H | -7.40770300 | 5.20739600  | -1.28596900 |
| H | -5.36065400 | 6.01652200  | -0.13032700 |
| H | -3.40727600 | 6.01126200  | -0.09833200 |
| H | -1.41746600 | 5.21452200  | 1.13444000  |
| H | 1.00728000  | 5.98326200  | 0.19412400  |
| H | 2.95214800  | 5.07466200  | 1.38468900  |
| H | -5.80850800 | -2.51779300 | 1.28373200  |
| H | -5.15319800 | -1.22805600 | -1.45577100 |
| H | -5.80500600 | 0.03025200  | 1.29867300  |
| H | -5.14811500 | 1.31507800  | -1.44361600 |
| H | -5.80195700 | 2.56644200  | 1.31371300  |
| H | -5.17637300 | 3.87036200  | -1.42518300 |
| H | -3.58196500 | 3.87065400  | 1.22150000  |



|   |             |             |             |
|---|-------------|-------------|-------------|
| H | -7.33093600 | 0.04425100  | -1.39478700 |
| H | -7.34053200 | 2.58911400  | -1.37280800 |
| H | -7.34706300 | -2.49749100 | -1.40199300 |
| H | -0.09992200 | -0.76490400 | 2.75015700  |
| H | -1.14731300 | -1.87212400 | 2.25092100  |
| H | -1.62261700 | -0.69262600 | 3.26737000  |
| O | -0.87763700 | -1.30098800 | 3.05492900  |

Graphane-OMe<sub>3</sub><sup>+</sup>

|   |             |             |             |
|---|-------------|-------------|-------------|
| C | 5.02174700  | -1.26874200 | -0.60012200 |
| C | 5.75544800  | -2.53557100 | -0.09824600 |
| C | 3.55462400  | -1.27398900 | -0.13183900 |
| C | 7.94707200  | -1.26021000 | -0.10277300 |
| C | 7.22710300  | -2.53112400 | -0.58494500 |
| C | 5.03979000  | -3.81274500 | -0.60168700 |
| C | 2.83708500  | -2.54347000 | -0.61037100 |
| C | 7.96851800  | -3.78478500 | -0.08370700 |
| C | 5.78483500  | -5.06027000 | -0.08104600 |
| C | 3.56594400  | -3.82240100 | -0.15342700 |
| C | 1.37611300  | -2.54743900 | -0.12914600 |
| C | 7.24978700  | -5.06163000 | -0.53269800 |
| H | 5.73280400  | -5.10236500 | 1.02268900  |
| C | 2.82652300  | -5.05765200 | -0.68255700 |
| C | 0.62614200  | -1.27194600 | -0.55010000 |
| C | 0.61736100  | -3.80789800 | -0.57538500 |
| H | 7.76897600  | -5.95006600 | -0.12501400 |
| C | 1.38328300  | -5.07853700 | -0.19595500 |
| H | 2.83978400  | -5.04503900 | -1.78053600 |
| C | -0.82887500 | -1.27017800 | -0.04794000 |
| C | -0.81524700 | -3.80587700 | -0.01917500 |
| H | 0.88184300  | -5.95675500 | -0.61072300 |
| C | -1.57809600 | -2.54697200 | -0.46407900 |
| C | -1.58247000 | -5.07717100 | -0.39363900 |
| C | -3.02967600 | -2.54272000 | 0.04657000  |
| C | -3.01729100 | -5.05854400 | 0.11706600  |
| H | -1.58129400 | -5.18299300 | -1.48910800 |
| C | -3.76057500 | -1.27251000 | -0.41473800 |
| C | -3.76911400 | -3.82202900 | -0.39328000 |
| H | -3.52901200 | -5.97892900 | -0.18629000 |
| C | -5.20885700 | -1.27028200 | 0.11320100  |
| C | -5.22849600 | -3.81533500 | 0.10210300  |
| C | -5.95829200 | -2.53479000 | -0.37131500 |
| C | -5.98906400 | -5.05826400 | -0.40778600 |
| C | -7.41545700 | -2.53322000 | 0.15635200  |
| H | -5.47881300 | -5.98210700 | -0.07478400 |
| C | -7.43988000 | -5.06454400 | 0.08754800  |
| C | -8.17047200 | -3.78427200 | -0.33183000 |
| C | -8.14806600 | -1.26102200 | -0.30275100 |
| H | -7.97030100 | -5.94906400 | -0.31406600 |
| C | -8.17105400 | 3.78481100  | -0.33037300 |

|   |             |             |             |
|---|-------------|-------------|-------------|
| C | -8.14827100 | 1.26154500  | -0.30224200 |
| C | -7.44086900 | 5.06504700  | 0.08984200  |
| C | -7.41601800 | 2.53368400  | 0.15760000  |
| C | -7.40543200 | 0.00022400  | 0.17035200  |
| C | -5.98979000 | 5.05921500  | -0.40472100 |
| H | -7.97122900 | 5.94962400  | -0.31172900 |
| C | -5.95867200 | 2.53578900  | -0.36956500 |
| C | -5.95170900 | 0.00051500  | -0.36294600 |
| C | -5.22929300 | 3.81615100  | 0.10497500  |
| H | -5.97169400 | 5.08578200  | -1.51111600 |
| C | -5.20915000 | 1.27107900  | 0.11428000  |
| C | -3.76962300 | 3.82341800  | -0.38955100 |
| C | -3.76075200 | 1.27408700  | -0.41331800 |
| C | -3.01826100 | 5.05964800  | 0.12211700  |
| C | -3.03017100 | 2.54387900  | 0.04963000  |
| C | -3.02251600 | 0.00060300  | 0.03343300  |
| C | -1.58337700 | 5.07902800  | -0.38835900 |
| H | -3.53014900 | 5.98018300  | -0.18051500 |
| C | -1.57842600 | 2.54884700  | -0.46053700 |
| C | -1.57552000 | 0.00110600  | -0.48097600 |
| C | -0.81585600 | 3.80762900  | -0.01482600 |
| H | -1.58211400 | 5.18576600  | -1.48374700 |
| C | -0.82878800 | 1.27175000  | -0.04588100 |
| C | 0.61653600  | 3.81032800  | -0.57158900 |
| C | 0.62582900  | 1.27444600  | -0.54897700 |
| C | 1.38244000  | 5.08078000  | -0.19156100 |
| C | 1.37561600  | 2.54955800  | -0.12677600 |
| C | 1.37019600  | 0.00121000  | -0.11765100 |
| C | 2.82535800  | 5.06049800  | -0.67912900 |
| H | 0.88057800  | 5.95923300  | -0.60532200 |
| C | 2.83646800  | 2.54630800  | -0.60836300 |
| C | 2.82967900  | 0.00144800  | -0.59274100 |
| C | 3.56533600  | 3.82511500  | -0.15107700 |
| H | 2.83791800  | 5.04849600  | -1.77712800 |
| C | 3.55441900  | 1.27665200  | -0.13089500 |
| C | 5.03890500  | 3.81586600  | -0.60032400 |
| C | 5.02144400  | 1.27190500  | -0.59953300 |
| C | 5.78401900  | 5.06346500  | -0.07997300 |
| C | 5.75502800  | 2.53871500  | -0.09746300 |
| C | 5.74822000  | 0.00155800  | -0.09847400 |
| C | 7.24877500  | 5.06507000  | -0.53226000 |
| H | 5.28444900  | 5.98296600  | -0.44280600 |
| C | 7.22654300  | 2.53461600  | -0.58457900 |
| C | 7.21668300  | 0.00175600  | -0.59198500 |
| C | 7.96786800  | 3.78836600  | -0.08345300 |
| H | 7.30502300  | 5.16355400  | -1.63400500 |
| C | 7.94684800  | 1.26379000  | -0.10265700 |
| H | -8.28012400 | -3.75832400 | -1.43282800 |
| H | -8.24908500 | -1.25473200 | -1.40447600 |
| H | -9.18188700 | 1.25925700  | 0.09141000  |

|   |             |             |             |
|---|-------------|-------------|-------------|
| H | -9.20013100 | 3.78699500  | 0.07480300  |
| H | 8.05101300  | 3.77075700  | 1.01924500  |
| H | 8.98917900  | 1.26105800  | -0.47516000 |
| H | 8.02600900  | -1.25755500 | 0.99962600  |
| H | 9.00758100  | -3.78513500 | -0.46436200 |
| H | -0.79955400 | 1.26250600  | 1.06364000  |
| H | -0.80100300 | -1.26257700 | 1.06139200  |
| H | 1.39827500  | 0.00135300  | 0.99576500  |
| H | -1.61555400 | 0.00207200  | -1.58531600 |
| H | 0.59013300  | 1.26848600  | -1.65269800 |
| H | 0.59093800  | -1.26498400 | -1.65383300 |
| H | -1.62100500 | 2.56184300  | -1.56512400 |
| H | -2.99151100 | 2.53628700  | 1.15346400  |
| H | -3.78280300 | 1.27970400  | -1.52195500 |
| H | -2.97755700 | 0.00000700  | 1.13731200  |
| H | -3.78285500 | -1.27683800 | -1.52337100 |
| H | -2.99049200 | -2.53614500 | 1.15042400  |
| H | -1.62076300 | -2.55910200 | -1.56865300 |
| H | -0.74193600 | -3.77288600 | 1.08503200  |
| H | 0.54744200  | -3.77330200 | -1.67657600 |
| H | 1.41233900  | -2.57066100 | 0.98054200  |
| H | -0.74224700 | 3.77391500  | 1.08927000  |
| H | 0.54614200  | 3.77663200  | -1.67278800 |
| H | 1.41169500  | 2.57111500  | 0.98294300  |
| H | 2.82190500  | 2.53654200  | -1.71056900 |
| H | 3.53949800  | 1.29267200  | 0.98328500  |
| H | 2.81234700  | 0.00192800  | -1.69445600 |
| H | 3.53933500  | -1.29056500 | 0.98218900  |
| H | 2.82284500  | -2.53313500 | -1.71256700 |
| H | -5.18819800 | -1.27452500 | 1.22874200  |
| H | -5.98670800 | -2.53078200 | -1.48670300 |
| H | -5.23153700 | -3.83537900 | 1.21830800  |
| H | -3.76535400 | -3.84413800 | -1.50079300 |
| H | -5.97156400 | -5.08429100 | -1.51420400 |
| H | -7.46489800 | -5.17144000 | 1.18891000  |
| H | -9.19937900 | -3.78680000 | 0.07378100  |
| H | -7.39134600 | -2.54927200 | 1.27279900  |
| H | -9.18162100 | -1.25914000 | 0.09106600  |
| H | -5.98446400 | 0.00097000  | -1.47845400 |
| H | -7.37889200 | -0.00000600 | 1.28704100  |
| H | -8.24911400 | 1.25577700  | -1.40398600 |
| H | -7.39229500 | 2.54930100  | 1.27405900  |
| H | -5.98671900 | 2.53254700  | -1.48497000 |
| H | -5.18874800 | 1.27454900  | 1.22982800  |
| H | -8.28023300 | 3.75930300  | -1.43142900 |
| H | -7.46647500 | 5.17153800  | 1.19122900  |
| H | -5.47983300 | 5.98296800  | -0.07100600 |
| H | -5.23296900 | 3.83560100  | 1.22118800  |
| H | -3.76526000 | 3.84640700  | -1.49705500 |
| H | 3.52914900  | 3.84827800  | 0.95814600  |

|   |             |             |             |
|---|-------------|-------------|-------------|
| H | 5.07418000  | 3.82761000  | -1.71725400 |
| H | 9.00685600  | 3.78891600  | -0.46428900 |
| H | 7.76798300  | 5.95361700  | -0.12485000 |
| H | 5.73244500  | 5.10551000  | 1.02379200  |
| H | 3.33341700  | 5.98110600  | -0.37042100 |
| H | 1.36486300  | 5.19442800  | 0.90425100  |
| H | -1.07523300 | 5.95934700  | 0.01499100  |
| H | -3.01200900 | 5.05199200  | 1.22119500  |
| H | 8.02584800  | 1.26103300  | 0.99974500  |
| H | 8.98943300  | -1.25719500 | -0.47520800 |
| H | 8.05148700  | -3.76718300 | 1.01899800  |
| H | 7.30652100  | -5.16018300 | -1.63441600 |
| H | 5.28556600  | -5.97983500 | -0.44413200 |
| H | 3.33457400  | -5.97833300 | -0.37405100 |
| H | 1.36500700  | -5.19308000 | 0.89976600  |
| H | -1.07408100 | -5.95770300 | 0.00893200  |
| H | -3.01083200 | -5.05191000 | 1.21615600  |
| H | 5.75336200  | 2.54212600  | 1.01667000  |
| H | 5.03915500  | 1.27297800  | -1.71714900 |
| H | 5.75218500  | 0.00134700  | 1.01524200  |
| H | 5.03973500  | -1.26941600 | -1.71773100 |
| H | 5.75350500  | -2.53926700 | 1.01587000  |
| H | 5.07576300  | -3.82430700 | -1.71860700 |
| H | 3.52905900  | -3.84613200 | 0.95580200  |
| H | 7.21822400  | 0.00182400  | -1.70998100 |
| H | 7.23265900  | -2.54266800 | -1.70252000 |
| H | 7.23179000  | 2.54625500  | -1.70215100 |
| O | 1.49301600  | -0.01929000 | 4.16314900  |
| C | 0.80802300  | 1.22922600  | 3.79959100  |
| H | -0.18571400 | 1.16993300  | 4.23938300  |
| H | 1.38717200  | 2.03460800  | 4.24756100  |
| H | 0.77179700  | 1.30480500  | 2.71013600  |
| C | 0.76054200  | -1.23191600 | 3.77040500  |
| H | 1.28777400  | -2.06626000 | 4.22913900  |
| H | -0.24156600 | -1.12876000 | 4.18202000  |
| H | 0.75190400  | -1.29839000 | 2.67993800  |
| C | 2.91248200  | -0.04079900 | 3.78383200  |
| H | 3.36921300  | 0.82280100  | 4.26356700  |
| H | 3.32006200  | -0.96937800 | 4.17848300  |
| H | 2.98433100  | 0.00788200  | 2.69438700  |

Graphane-SH<sub>3</sub><sup>+</sup>

|   |             |            |             |
|---|-------------|------------|-------------|
| C | -5.10210800 | 1.29518100 | -0.43756600 |
| C | -5.83181700 | 2.56394100 | 0.06569400  |
| C | -3.63200400 | 1.29825800 | 0.02011900  |
| C | -8.02433400 | 1.29298100 | 0.07640400  |
| C | -7.30416600 | 2.55907700 | -0.41844500 |
| C | -5.11354100 | 3.84011300 | -0.43588600 |
| C | -2.91461600 | 2.57120500 | -0.44978700 |
| C | -8.04387600 | 3.81627100 | 0.07654200  |

|   |             |             |             |
|---|-------------|-------------|-------------|
| C | -5.85962500 | 5.08846700  | 0.08105300  |
| C | -3.64291300 | 3.84527600  | 0.02302000  |
| C | -1.45213200 | 2.56732400  | 0.02792300  |
| C | -7.32269600 | 5.09020200  | -0.37639700 |
| H | -5.81220500 | 5.12985300  | 1.18543900  |
| C | -2.89969900 | 5.08704400  | -0.48476600 |
| C | -0.70602800 | 1.30253300  | -0.42936000 |
| C | -0.69319700 | 3.83637300  | -0.39279100 |
| H | -7.84206300 | 5.98089600  | 0.02620700  |
| C | -1.45959700 | 5.09894700  | 0.01086600  |
| H | -2.90677800 | 5.09184200  | -1.58299300 |
| C | 0.74951100  | 1.28692800  | 0.07060700  |
| C | 0.73847900  | 3.82295300  | 0.16550400  |
| H | -0.95557800 | 5.98480600  | -0.38391600 |
| C | 1.50149400  | 2.57453700  | -0.30764000 |
| C | 1.50680900  | 5.10128100  | -0.18199800 |
| C | 2.95555600  | 2.55614000  | 0.19493200  |
| C | 2.94227200  | 5.06967400  | 0.32580200  |
| H | 1.50316700  | 5.23347600  | -1.27458000 |
| C | 3.68350000  | 1.29969500  | -0.30591500 |
| C | 3.69170900  | 3.84671300  | -0.21843700 |
| H | 3.45391800  | 5.99673200  | 0.04412700  |
| C | 5.13644500  | 1.28294700  | 0.20729500  |
| C | 5.15428300  | 3.82694700  | 0.26646600  |
| C | 5.88064200  | 2.56098300  | -0.24938200 |
| C | 5.91034100  | 5.08448100  | -0.21324000 |
| C | 7.34290100  | 2.54482900  | 0.26356900  |
| H | 5.40290700  | 5.99798700  | 0.15163800  |
| C | 7.36527300  | 5.07683600  | 0.26952700  |
| C | 8.09269700  | 3.81025200  | -0.19427100 |
| C | 8.07066600  | 1.28731600  | -0.24140400 |
| H | 7.89185500  | 5.97344600  | -0.11005800 |
| C | 8.09340500  | -3.75579300 | -0.41749600 |
| C | 8.07052500  | -1.23419500 | -0.31728800 |
| C | 7.37178900  | -5.04794000 | -0.01975900 |
| C | 7.34632000  | -2.51935100 | 0.11761800  |
| C | 7.33424900  | 0.01218600  | 0.20258500  |
| C | 5.91147100  | -5.03005900 | -0.48605900 |
| H | 7.89489200  | -5.92040200 | -0.45629100 |
| C | 5.88042100  | -2.50883700 | -0.38576800 |
| C | 5.87388600  | 0.02616000  | -0.31225900 |
| C | 5.16114300  | -3.80118800 | 0.07119500  |
| H | 5.87248800  | -5.02742400 | -1.59229500 |
| C | 5.13798900  | -1.25703600 | 0.14075400  |
| C | 3.69109300  | -3.80113700 | -0.39005900 |
| C | 3.68317400  | -1.24861000 | -0.36728800 |
| C | 2.95363800  | -5.04366200 | 0.12748000  |
| C | 2.96072600  | -2.52762200 | 0.08240800  |
| C | 2.95024300  | 0.01499600  | 0.11647000  |
| C | 1.50208200  | -5.05744100 | -0.33365100 |

|   |             |             |             |
|---|-------------|-------------|-------------|
| H | 3.45368400  | -5.95974100 | -0.20586100 |
| C | 1.49943500  | -2.52994900 | -0.39984300 |
| C | 1.49901500  | 0.02531400  | -0.38525400 |
| C | 0.74941300  | -3.78670100 | 0.07214200  |
| H | 1.46160300  | -5.15684400 | -1.42876000 |
| C | 0.75891600  | -1.25391100 | 0.03092400  |
| C | -0.70441700 | -3.79310100 | -0.42368600 |
| C | -0.70887800 | -1.25163000 | -0.43645400 |
| C | -1.45974500 | -5.05181100 | 0.01167600  |
| C | -1.44911900 | -2.52194100 | 0.01493200  |
| C | -1.45122500 | 0.02692400  | -0.01262200 |
| C | -2.91559800 | -5.04228700 | -0.43481500 |
| H | -0.97046400 | -5.94066300 | -0.39367800 |
| C | -2.92387800 | -2.52456400 | -0.42115100 |
| C | -2.91722000 | 0.02414500  | -0.46255100 |
| C | -3.64318600 | -3.79349800 | 0.07901300  |
| H | -2.95887300 | -5.06187200 | -1.53181000 |
| C | -3.63090400 | -1.24241800 | 0.04005400  |
| C | -5.12281200 | -3.79302900 | -0.34750200 |
| C | -5.10435600 | -1.24833400 | -0.40600900 |
| C | -5.86138800 | -5.02639800 | 0.21476000  |
| C | -5.83166500 | -2.50357200 | 0.13278400  |
| C | -5.82558800 | 0.03033000  | 0.08240400  |
| C | -7.33047800 | -5.03953000 | -0.22340200 |
| H | -5.36615500 | -5.95612200 | -0.12653300 |
| C | -7.30816000 | -2.51025300 | -0.34010300 |
| C | -7.29767200 | 0.02383700  | -0.39966000 |
| C | -8.04471600 | -3.75122900 | 0.19874100  |
| H | -7.39783700 | -5.16729700 | -1.32144100 |
| C | -8.02413600 | -1.22889700 | 0.11897700  |
| H | 8.19289500  | 3.81727700  | -1.29646300 |
| H | 8.15996900  | 1.31404600  | -1.34386200 |
| H | 9.11016900  | -1.24205900 | 0.06064700  |
| H | 9.12947500  | -3.76793100 | -0.03022100 |
| H | -8.11816200 | -3.70522800 | 1.30155800  |
| H | -9.06915200 | -1.23324400 | -0.24569700 |
| H | -8.09995300 | 1.30202200  | 1.17956900  |
| H | -9.08274400 | 3.81660500  | -0.30421500 |
| H | 0.76476400  | -1.27155800 | 1.14264700  |
| H | 0.71509100  | 1.26489400  | 1.18902100  |
| H | -1.49296800 | 0.04155200  | 1.09557500  |
| H | 1.52840800  | 0.04526800  | -1.48907800 |
| H | -0.69459200 | -1.26424700 | -1.53969100 |
| H | -0.66990200 | 1.31773200  | -1.53247500 |
| H | 1.51529700  | -2.54377700 | -1.50454100 |
| H | 2.94171000  | -2.54002000 | 1.18708300  |
| H | 3.68915300  | -1.23064800 | -1.47570000 |
| H | 2.91586900  | -0.01082800 | 1.22144500  |
| H | 3.69455700  | 1.33177800  | -1.41409500 |
| H | 2.92462000  | 2.52194100  | 1.29841900  |

|   |             |             |             |
|---|-------------|-------------|-------------|
| H | 1.53953600  | 2.60883800  | -1.41197900 |
| H | 0.66559800  | 3.76739400  | 1.26781500  |
| H | -0.62175400 | 3.82510300  | -1.49451000 |
| H | -1.47785400 | 2.55509300  | 1.13764700  |
| H | 0.72262800  | -3.75477300 | 1.17940700  |
| H | -0.67978100 | -3.77820100 | -1.52706000 |
| H | -1.46000200 | -2.53593500 | 1.13621900  |
| H | -2.92960100 | -2.54089500 | -1.52328500 |
| H | -3.59656700 | -1.22325000 | 1.15381100  |
| H | -2.92623900 | 0.01499600  | -1.56405600 |
| H | -3.60638000 | 1.29242000  | 1.13296100  |
| H | -2.90282700 | 2.57378300  | -1.55224100 |
| H | 5.12800000  | 1.25671200  | 1.32273800  |
| H | 5.89850100  | 2.58831200  | -1.36472300 |
| H | 5.16564200  | 3.81553900  | 1.38279000  |
| H | 3.68034900  | 3.89495500  | -1.32510100 |
| H | 5.88321200  | 5.14370000  | -1.31819800 |
| H | 7.40001800  | 5.15128700  | 1.37336700  |
| H | 9.12525400  | 3.80168500  | 0.20220800  |
| H | 7.33018400  | 2.52751800  | 1.38023300  |
| H | 9.10870500  | 1.27460500  | 0.14071200  |
| H | 5.89307700  | 0.05575500  | -1.42772100 |
| H | 7.32203800  | -0.02092700 | 1.31911800  |
| H | 8.15538000  | -1.19683000 | -1.41978400 |
| H | 7.34084400  | -2.56648000 | 1.23355400  |
| H | 5.89036200  | -2.47884100 | -1.50106000 |
| H | 5.13355400  | -1.28943900 | 1.25613900  |
| H | 8.18422100  | -3.70010100 | -1.51913300 |
| H | 7.41902100  | -5.18594000 | 1.07747000  |
| H | 5.40863100  | -5.96297800 | -0.16730600 |
| H | 5.19015500  | -3.84872000 | 1.18643800  |
| H | 3.66031700  | -3.81029400 | -1.49710900 |
| H | -3.58899700 | -3.79060200 | 1.18751100  |
| H | -5.17520400 | -3.83285400 | -1.46332700 |
| H | -9.08726300 | -3.76073100 | -0.17224500 |
| H | -7.84581200 | -5.91666800 | 0.21287600  |
| H | -5.80017500 | -5.03668200 | 1.31899900  |
| H | -3.41421100 | -5.95334200 | -0.08610100 |
| H | -1.40910300 | -5.13697300 | 1.10906700  |
| H | 1.00742100  | -5.93906000 | 0.08230000  |
| H | 2.98481300  | -5.05302700 | 1.22596600  |
| H | -8.09519600 | -1.20285700 | 1.22212200  |
| H | -9.06762400 | 1.28768200  | -0.29290500 |
| H | -8.12689100 | 3.80324200  | 1.17963500  |
| H | -7.37560300 | 5.18399600  | -1.47854500 |
| H | -5.35853800 | 6.00783800  | -0.27928800 |
| H | -3.40801700 | 6.00323800  | -0.16429900 |
| H | -1.44732700 | 5.19004600  | 1.10838100  |
| H | 0.99905400  | 5.97121100  | 0.24304300  |
| H | 2.93849100  | 5.03539600  | 1.42418500  |

|   |             |             |             |
|---|-------------|-------------|-------------|
| H | -5.81916400 | -2.48006100 | 1.24698600  |
| H | -5.13952200 | -1.27067400 | -1.52293200 |
| H | -5.82128200 | 0.04497600  | 1.19705400  |
| H | -5.13054900 | 1.28995400  | -1.55444000 |
| H | -5.82787500 | 2.56661000  | 1.18057400  |
| H | -5.14337400 | 3.85189700  | -1.55265800 |
| H | -3.61294100 | 3.85274200  | 1.13171800  |
| H | -7.30911900 | 0.00563800  | -1.51711300 |
| H | -7.31250300 | 2.56278700  | -1.53577300 |
| H | -7.32456200 | -2.54827500 | -1.45687300 |
| H | 0.03876500  | 0.17335500  | 2.66228000  |
| H | -0.94014400 | -1.54812800 | 2.57815600  |
| H | -1.73969900 | 0.00131900  | 3.54793700  |
| S | -0.56470400 | -0.66502500 | 3.55047400  |

Graphane-SMe<sub>3</sub><sup>+</sup>

|   |             |             |             |
|---|-------------|-------------|-------------|
| C | 5.10893100  | -1.26998900 | -0.59707600 |
| C | 5.83278700  | -2.53689800 | -0.08146000 |
| C | 3.63420600  | -1.27354500 | -0.15200000 |
| C | 8.02377900  | -1.26199600 | -0.03885000 |
| C | 7.31407800  | -2.53230700 | -0.53763600 |
| C | 5.12770500  | -3.81385700 | -0.60018800 |
| C | 2.92700400  | -2.54296200 | -0.64854100 |
| C | 8.04491000  | -3.78653300 | -0.02203900 |
| C | 5.86208000  | -5.06180700 | -0.06517900 |
| C | 3.64554300  | -3.82356700 | -0.18044900 |
| C | 1.45717900  | -2.54913900 | -0.19634900 |
| C | 7.33585600  | -5.06300300 | -0.48743600 |
| H | 5.78842800  | -5.10237800 | 1.03756000  |
| C | 2.91639800  | -5.05667700 | -0.72928200 |
| C | 0.71550000  | -1.27281600 | -0.62996200 |
| C | 0.70502200  | -3.80853200 | -0.65643200 |
| H | 7.84662900  | -5.95173100 | -0.07033300 |
| C | 1.46472500  | -5.08048100 | -0.26871100 |
| H | 2.94929400  | -5.03897400 | -1.82686400 |
| C | -0.74558700 | -1.27244800 | -0.14676100 |
| C | -0.73381800 | -3.80747600 | -0.11636800 |
| H | 0.97063200  | -5.95752400 | -0.69517600 |
| C | -1.49272200 | -2.54860900 | -0.56763300 |
| C | -1.49856400 | -5.07812300 | -0.49724800 |
| C | -2.94809400 | -2.54332700 | -0.06778100 |
| C | -2.93670300 | -5.05970300 | 0.00419500  |
| H | -1.49015100 | -5.18338000 | -1.59263700 |
| C | -3.67652200 | -1.27417300 | -0.53536400 |
| C | -3.68512000 | -3.82316300 | -0.51074100 |
| H | -3.44718500 | -5.97957700 | -0.30253300 |
| C | -5.12854300 | -1.27079400 | -0.01720900 |
| C | -5.14828900 | -3.81586100 | -0.02613300 |
| C | -5.87446800 | -2.53567500 | -0.50612900 |
| C | -5.90493700 | -5.05885700 | -0.54163800 |



|   |             |             |             |
|---|-------------|-------------|-------------|
| C | -7.33589900 | -2.53356100 | 0.00957200  |
| H | -5.39756200 | -5.98275800 | -0.20420000 |
| C | -7.35998800 | -5.06490000 | -0.05907900 |
| C | -8.08680800 | -3.78459400 | -0.48477500 |
| C | -8.06430100 | -1.26131000 | -0.45597600 |
| H | -7.88690800 | -5.94928700 | -0.46597100 |
| C | -8.08680700 | 3.78461000  | -0.48526100 |
| C | -8.06429300 | 1.26132900  | -0.45615800 |
| C | -7.36002000 | 5.06498400  | -0.05970600 |
| C | -7.33591700 | 2.53363700  | 0.00927400  |
| C | -7.32555500 | 0.00003900  | 0.02270100  |
| C | -5.90491600 | 5.05887100  | -0.54210100 |
| H | -7.88689400 | 5.94929900  | -0.46681600 |
| C | -5.87445700 | 2.53570400  | -0.50634400 |
| C | -5.86766300 | 0.00001400  | -0.49918000 |
| C | -5.14832900 | 3.81592900  | -0.02637300 |
| H | -5.87767700 | 5.08560100  | -1.64843200 |
| C | -5.12855700 | 1.27085500  | -0.01729400 |
| C | -3.68509400 | 3.82321800  | -0.51078200 |
| C | -3.67651600 | 1.27421900  | -0.53539000 |
| C | -2.93674100 | 5.05972200  | 0.00432600  |
| C | -2.94812300 | 2.54337000  | -0.06775400 |
| C | -2.94211300 | 0.00002200  | -0.08503700 |
| C | -1.49853200 | 5.07820200  | -0.49691100 |
| H | -3.44718900 | 5.97962300  | -0.30238000 |
| C | -1.49271900 | 2.54866900  | -0.56750700 |
| C | -1.48895500 | 0.00003300  | -0.58276000 |
| C | -0.73383000 | 3.80749700  | -0.11611700 |
| H | -1.48994200 | 5.18364300  | -1.59228100 |
| C | -0.74560600 | 1.27248400  | -0.14666800 |
| C | 0.70502300  | 3.80858400  | -0.65615800 |
| C | 0.71550400  | 1.27288600  | -0.62982200 |
| C | 1.46470200  | 5.08053800  | -0.26840500 |
| C | 1.45717600  | 2.54918000  | -0.19612600 |
| C | 1.45260800  | 0.00001500  | -0.18424900 |
| C | 2.91638700  | 5.05674900  | -0.72894500 |
| H | 0.97060500  | 5.95756400  | -0.69490400 |
| C | 2.92700000  | 2.54303300  | -0.64833300 |
| C | 2.91979600  | 0.00003800  | -0.63386000 |
| C | 3.64553200  | 3.82361400  | -0.18016800 |
| H | 2.94929500  | 5.03909700  | -1.82652800 |
| C | 3.63420500  | 1.27358100  | -0.15189100 |
| C | 5.12769600  | 3.81393300  | -0.59990500 |
| C | 5.10892400  | 1.27006300  | -0.59696800 |
| C | 5.86207200  | 5.06184300  | -0.06481200 |
| C | 5.83278400  | 2.53693900  | -0.08127300 |
| C | 5.82625300  | 0.00001900  | -0.08149600 |
| C | 7.33584300  | 5.06308300  | -0.48708000 |
| H | 5.36989300  | 5.98126700  | -0.43689700 |
| C | 7.31406500  | 2.53237900  | -0.53747500 |

|   |             |             |             |
|---|-------------|-------------|-------------|
| C | 7.30428900  | 0.00003700  | -0.54422900 |
| C | 8.04491800  | 3.78657200  | -0.02183300 |
| H | 7.41452200  | 5.15965400  | -1.58748600 |
| C | 8.02377400  | 1.26203900  | -0.03877100 |
| H | -8.18706300 | -3.75893400 | -1.58678000 |
| H | -8.15624000 | -1.25548700 | -1.55862300 |
| H | -9.10135200 | 1.25921900  | -0.07154100 |
| H | -9.11933200 | 3.78712600  | -0.08886800 |
| H | 8.10306200  | 3.76941900  | 1.08259600  |
| H | 9.07438900  | 1.25903300  | -0.38596100 |
| H | 8.07498600  | -1.25932600 | 1.06547000  |
| H | 9.09187200  | -3.78620700 | -0.37963000 |
| H | -0.72357300 | 1.27400200  | 0.96454000  |
| H | -0.72350800 | -1.27400700 | 0.96445100  |
| H | 1.46844800  | -0.00008600 | 0.92711800  |
| H | -1.51962200 | 0.00008100  | -1.68710500 |
| H | 0.69415300  | 1.26649400  | -1.73393400 |
| H | 0.69414400  | -1.26633100 | -1.73407000 |
| H | -1.52701900 | 2.56049100  | -1.67219200 |
| H | -2.91588000 | 2.53541900  | 1.03752000  |
| H | -3.69082200 | 1.27927100  | -1.64380700 |
| H | -2.91408500 | 0.00004500  | 1.02129100  |
| H | -3.69087700 | -1.27921300 | -1.64378100 |
| H | -2.91575600 | -2.53536200 | 1.03749200  |
| H | -1.52708000 | -2.56036300 | -1.67231700 |
| H | -0.67124900 | -3.77444900 | 0.98883600  |
| H | 0.64861400  | -3.77234800 | -1.75835200 |
| H | 1.47182100  | -2.57331500 | 0.91288600  |
| H | -0.67127700 | 3.77438000  | 0.98908400  |
| H | 0.64861800  | 3.77243600  | -1.75807900 |
| H | 1.47184000  | 2.57328300  | 0.91311100  |
| H | 2.93424600  | 2.53103400  | -1.75085100 |
| H | 3.59643500  | 1.27913400  | 0.96016100  |
| H | 2.92434600  | 0.00008100  | -1.73611400 |
| H | 3.59644500  | -1.27919800 | 0.96005400  |
| H | 2.93427200  | -2.53089000 | -1.75105800 |
| H | -5.11633000 | -1.27485100 | 1.09805500  |
| H | -5.89405600 | -2.53273200 | -1.62185700 |
| H | -5.16003200 | -3.83593800 | 1.08974200  |
| H | -3.67362200 | -3.84510100 | -1.61806400 |
| H | -5.87782000 | -5.08571100 | -1.64796900 |
| H | -7.39515300 | -5.17263300 | 1.04182400  |
| H | -9.11932200 | -3.78706600 | -0.08836000 |
| H | -7.32138100 | -2.54959700 | 1.12605500  |
| H | -9.10134400 | -1.25916200 | -0.07131500 |
| H | -5.89198300 | -0.00002700 | -1.61504600 |
| H | -7.30824800 | 0.00011900  | 1.13942500  |
| H | -8.15617900 | 1.25537400  | -1.55880800 |
| H | -7.32146200 | 2.54981000  | 1.12575600  |
| H | -5.89397300 | 2.53269200  | -1.62207100 |

|   |             |             |             |
|---|-------------|-------------|-------------|
| H | -5.11638300 | 1.27501200  | 1.09797200  |
| H | -8.18703100 | 3.75880800  | -1.58726300 |
| H | -7.39531200 | 5.17291300  | 1.04117300  |
| H | -5.39756600 | 5.98280400  | -0.20471100 |
| H | -5.16022500 | 3.83610900  | 1.08949800  |
| H | -3.67344100 | 3.84518900  | -1.61810200 |
| H | 3.58710100  | 3.85084500  | 0.92762200  |
| H | 5.18578100  | 3.82456600  | -1.71568600 |
| H | 9.09185600  | 3.78627500  | -0.37950100 |
| H | 7.84661600  | 5.95176800  | -0.06988200 |
| H | 5.78842800  | 5.10233700  | 1.03793000  |
| H | 3.41839300  | 5.97918300  | -0.41562600 |
| H | 1.42799800  | 5.19843100  | 0.82652000  |
| H | -0.99254800 | 5.95865600  | -0.09152400 |
| H | -2.93761400 | 5.05355300  | 1.10361700  |
| H | 8.07497900  | 1.25929700  | 1.06554900  |
| H | 9.07439300  | -1.25896100 | -0.38604200 |
| H | 8.10297500  | -3.76946500 | 1.08239600  |
| H | 7.41454200  | -5.15944600 | -1.58785200 |
| H | 5.36991000  | -5.98120500 | -0.43733300 |
| H | 3.41840600  | -5.97912500 | -0.41600600 |
| H | 1.42806200  | -5.19835800 | 0.82621900  |
| H | -0.99252900 | -5.95865200 | -0.09209100 |
| H | -2.93743300 | -5.05362700 | 1.10348600  |
| H | 5.80704000  | 2.54025300  | 1.03298800  |
| H | 5.14626700  | 1.27063100  | -1.71367700 |
| H | 5.80547500  | -0.00003300 | 1.03282200  |
| H | 5.14628000  | -1.27048000 | -1.71377900 |
| H | 5.80703100  | -2.54029400 | 1.03280200  |
| H | 5.18579500  | -3.82441400 | -1.71596800 |
| H | 3.58711900  | -3.85086000 | 0.92734000  |
| H | 7.32984900  | 0.00006800  | -1.66169500 |
| H | 7.34294300  | -2.54249100 | -1.65469000 |
| H | 7.34290700  | 2.54261600  | -1.65453100 |
| C | 0.98488300  | 1.40252300  | 3.65694100  |
| H | 0.51655000  | 2.31306100  | 4.03580000  |
| H | 2.04930600  | 1.40549200  | 3.90146300  |
| H | 0.83425200  | 1.30363000  | 2.57940600  |
| C | -1.43901700 | -0.00046900 | 3.81181400  |
| H | -1.95057500 | -0.89335200 | 4.17670700  |
| H | -1.95053100 | 0.89261500  | 4.17627200  |
| H | -1.38383100 | -0.00077100 | 2.71997600  |
| C | 0.98502700  | -1.40287100 | 3.65635400  |
| H | 2.04907600  | -1.40706900 | 3.90245800  |
| H | 0.51531000  | -2.31350500 | 4.03327600  |
| H | 0.83606900  | -1.30242900 | 2.57873100  |
| S | 0.22913800  | -0.00040800 | 4.51032700  |

XYZ coordinates (in Å) of graphene complexes optimized at ONIOM (M06-2X/6-31G\*/PM6) level.

## Graphene-Trp

|   |             |             |             |
|---|-------------|-------------|-------------|
| C | -5.14530200 | 1.37095200  | -0.38809400 |
| C | -5.89707200 | 2.54071900  | -0.12146000 |
| C | -3.69567200 | 1.42959000  | -0.47679900 |
| C | -7.97594200 | 1.24121000  | -0.22719800 |
| C | -7.32938200 | 2.46280800  | -0.04234800 |
| C | -5.24986100 | 3.81114700  | 0.07067100  |
| C | -3.04201300 | 2.68663100  | -0.30381200 |
| C | -8.07163200 | 3.66955300  | 0.23080700  |
| C | -6.00318700 | 4.93897600  | 0.32950200  |
| C | -3.77974000 | 3.85963000  | -0.02012800 |
| C | -1.61494000 | 2.75608000  | -0.39668600 |
| C | -7.42431600 | 4.85878200  | 0.40869000  |
| H | -5.53561000 | 5.90881600  | 0.47593200  |
| C | -3.09957300 | 5.06162900  | 0.18779400  |
| C | -0.85172700 | 1.55634200  | -0.62940800 |
| C | -0.95828300 | 3.98928500  | -0.20600400 |
| H | -7.98001800 | 5.77294200  | 0.61435000  |
| C | -1.72172100 | 5.12394200  | 0.10185300  |
| H | -3.65894000 | 5.96381500  | 0.42755500  |
| C | 0.56872100  | 1.60945000  | -0.65662000 |
| C | 0.49903200  | 4.05282200  | -0.29970800 |
| H | -1.24081100 | 6.07338000  | 0.29593600  |
| C | 1.24364300  | 2.86713600  | -0.48393900 |
| C | 1.18797700  | 5.26999400  | -0.20723000 |
| C | 2.67534200  | 2.92678600  | -0.50653400 |
| C | 2.56892700  | 5.33560700  | -0.23897100 |
| H | 0.63421400  | 6.19797700  | -0.11483900 |
| C | 3.41821400  | 1.71662000  | -0.65962700 |
| C | 3.32944800  | 4.17358700  | -0.37290700 |
| H | 3.05321100  | 6.30444500  | -0.15600500 |
| C | 4.87132800  | 1.77259300  | -0.65193200 |
| C | 4.79997700  | 4.23989400  | -0.38060800 |
| C | 5.54190900  | 3.00993100  | -0.51487800 |
| C | 5.48524700  | 5.43178300  | -0.25738000 |
| C | 6.97820200  | 3.05349700  | -0.50738600 |
| H | 4.94379500  | 6.37810000  | -0.15576100 |
| C | 6.91277000  | 5.47591600  | -0.25605500 |
| C | 7.64104100  | 4.32749500  | -0.37501100 |
| C | 7.70807400  | 1.86924700  | -0.62527400 |
| H | 7.40115000  | 6.44673900  | -0.15630100 |
| C | 7.90328100  | -3.04024400 | -1.10176600 |
| C | 7.79555300  | -0.58180300 | -0.86831300 |
| C | 7.25824100  | -4.23679200 | -1.22426700 |
| C | 7.15213900  | -1.81290700 | -0.99736900 |
| C | 7.05745700  | 0.62077700  | -0.75795900 |
| C | 5.83109800  | -4.29070500 | -1.25191200 |
| H | 7.81358000  | -5.17302400 | -1.30239100 |
| C | 5.71585600  | -1.86769400 | -1.02483200 |

|   |             |             |             |
|---|-------------|-------------|-------------|
| C | 5.62031900  | 0.57175100  | -0.77799500 |
| C | 5.06354500  | -3.14730300 | -1.15716200 |
| H | 5.35775300  | -5.27333700 | -1.35104000 |
| C | 4.95890100  | -0.67811800 | -0.92061900 |
| C | 3.59278300  | -3.18315700 | -1.18778000 |
| C | 3.50626700  | -0.72125300 | -0.95366600 |
| C | 2.91736400  | -4.40105800 | -1.27848800 |
| C | 2.85202700  | -1.98163200 | -1.10807300 |
| C | 2.76856200  | 0.47438400  | -0.81748400 |
| C | 1.53566600  | -4.43467900 | -1.31970900 |
| H | 3.46930100  | -5.33596300 | -1.31128600 |
| C | 1.41980800  | -2.02304600 | -1.14914500 |
| C | 1.31424400  | 0.42379000  | -0.83191600 |
| C | 0.76239500  | -3.26515400 | -1.28544900 |
| H | 1.04891200  | -5.40268200 | -1.36617000 |
| C | 0.65644100  | -0.81207100 | -1.01126700 |
| C | -0.69693700 | -3.31318500 | -1.35222600 |
| C | -0.76437100 | -0.86679800 | -0.99718100 |
| C | -1.38164400 | -4.51653800 | -1.57293600 |
| C | -1.43947700 | -2.12838300 | -1.17031700 |
| C | -1.51215500 | 0.31660300  | -0.79803500 |
| C | -2.76251900 | -4.57142200 | -1.55613800 |
| H | -0.83681000 | -5.43004000 | -1.77011300 |
| C | -2.87075200 | -2.18432900 | -1.13532400 |
| C | -2.96487400 | 0.25313900  | -0.72521400 |
| C | -3.52546900 | -3.42483000 | -1.32242800 |
| H | -3.25905600 | -5.52499500 | -1.72482200 |
| C | -3.61147600 | -0.98851200 | -0.89023900 |
| C | -4.99639000 | -3.50316400 | -1.27355600 |
| C | -5.06111900 | -1.05862400 | -0.82738300 |
| C | -5.67084000 | -4.69293000 | -1.46248800 |
| C | -5.72929200 | -2.29292000 | -1.01167800 |
| C | -5.80743300 | 0.12494400  | -0.56868400 |
| C | -7.09459000 | -4.73682800 | -1.39894400 |
| H | -5.13836100 | -5.61796900 | -1.66526500 |
| C | -7.16405000 | -2.34065900 | -0.94347200 |
| C | -7.24831800 | 0.06116700  | -0.49269800 |
| C | -7.82176800 | -3.60895300 | -1.14712300 |
| H | -7.58659900 | -5.69593500 | -1.55663000 |
| C | -7.89249400 | -1.18108100 | -0.68442000 |
| H | 8.73172800  | 4.34693300  | -0.37267300 |
| H | 8.80119500  | 1.90183300  | -0.61456400 |
| H | 8.88825200  | -0.53901700 | -0.84930100 |
| H | 8.99252800  | -2.98504300 | -1.07857400 |
| H | -8.90729600 | -3.63462800 | -1.09633700 |
| H | -8.97615500 | -1.22261700 | -0.63083600 |
| H | -9.05890100 | 1.18793000  | -0.16982100 |
| H | -9.15491200 | 3.60067300  | 0.28859100  |
| N | 3.60931400  | -3.32608400 | 3.40599800  |
| H | 3.49209600  | -4.23875700 | 2.96501900  |

|   |             |             |            |
|---|-------------|-------------|------------|
| C | 2.28367500  | -2.73141000 | 3.53191200 |
| H | 2.34143600  | -1.82659400 | 4.14452900 |
| C | 1.76174500  | -2.37257900 | 2.12867500 |
| C | 1.27807200  | -3.68688100 | 4.15608100 |
| H | 2.48637000  | -1.68587000 | 1.67807800 |
| H | 1.76490000  | -3.29210600 | 1.52825300 |
| C | 0.39253700  | -1.77045400 | 2.14262400 |
| O | 1.15762000  | -4.84130100 | 3.81665600 |
| C | -0.80039900 | -2.41531500 | 1.95243600 |
| C | 0.06944400  | -0.39098700 | 2.39914300 |
| H | -0.98783300 | -3.45466800 | 1.71133700 |
| N | -1.84441700 | -1.52817400 | 2.08798500 |
| C | -1.34010700 | -0.27554300 | 2.35123300 |
| C | 0.84088900  | 0.76110800  | 2.61987900 |
| H | -2.80572800 | -1.72278700 | 1.84296200 |
| C | -1.99546000 | 0.94701800  | 2.52712800 |
| C | 0.19812800  | 1.97664700  | 2.78167000 |
| H | 1.92601400  | 0.70009500  | 2.64335500 |
| H | -3.07932500 | 1.02069900  | 2.46653200 |
| C | -1.20823900 | 2.06557400  | 2.73972300 |
| H | 0.78068900  | 2.87996800  | 2.93454100 |
| H | -1.68555600 | 3.03594100  | 2.84969200 |
| H | 3.99093900  | -3.51201700 | 4.33178300 |
| O | 0.52352500  | -3.12326500 | 5.10945400 |
| H | -0.12411200 | -3.79543300 | 5.38851300 |

#### Graphene-Tyr

|   |             |            |             |
|---|-------------|------------|-------------|
| C | -5.47562000 | 1.25073600 | -0.03551000 |
| C | -6.24404400 | 2.40070800 | 0.25737100  |
| C | -4.03202800 | 1.34502900 | -0.18653900 |
| C | -8.29341100 | 1.05733900 | 0.24240600  |
| C | -7.66997900 | 2.29634700 | 0.40060100  |
| C | -5.61393900 | 3.68894400 | 0.41592700  |
| C | -3.40025200 | 2.61840800 | -0.04209800 |
| C | -8.43332500 | 3.48168500 | 0.70506900  |
| C | -6.39229200 | 4.79112600 | 0.70644300  |
| C | -4.15354400 | 3.77852300 | 0.25497400  |
| C | -1.97920900 | 2.71521800 | -0.20460400 |
| C | -7.80911400 | 4.68654200 | 0.85298400  |
| H | -5.93650500 | 5.77876300 | 0.83113400  |
| C | -3.49991400 | 5.00222300 | 0.39912500  |
| C | -1.20267100 | 1.53746400 | -0.48533600 |
| C | -1.34403700 | 3.97145800 | -0.07215700 |
| H | -8.37426000 | 5.59118300 | 1.08383100  |
| C | -2.12874100 | 5.08961000 | 0.24086600  |
| H | -4.06113900 | 5.90054600 | 0.64005500  |
| C | 0.21302200  | 1.63197700 | -0.61277800 |
| C | 0.10456400  | 4.07612900 | -0.24548300 |
| H | -1.66048400 | 6.05844100 | 0.37604500  |
| C | 0.86411200  | 2.90899600 | -0.48030200 |

|   |             |             |             |
|---|-------------|-------------|-------------|
| C | 0.76317500  | 5.30986700  | -0.17830400 |
| C | 2.29023100  | 2.99770800  | -0.59148300 |
| C | 2.13778900  | 5.40098900  | -0.29933900 |
| H | 0.20461500  | 6.22464900  | -0.03437500 |
| C | 3.05192300  | 1.80874500  | -0.78870000 |
| C | 2.92009400  | 4.26216100  | -0.49267900 |
| H | 2.61231500  | 6.37813500  | -0.23623200 |
| C | 4.50123300  | 1.90249400  | -0.84733200 |
| C | 4.38631700  | 4.37139600  | -0.58953500 |
| C | 5.14521300  | 3.15856600  | -0.74910600 |
| C | 5.03525500  | 5.58762000  | -0.51991300 |
| C | 6.57879000  | 3.23000100  | -0.81061600 |
| H | 4.48277100  | 6.51662200  | -0.40514000 |
| C | 6.45779600  | 5.65712700  | -0.59587600 |
| C | 7.20943700  | 4.52549100  | -0.73204200 |
| C | 7.33300400  | 2.06444600  | -0.93954200 |
| H | 6.92824600  | 6.63823200  | -0.53970100 |
| C | 7.61725600  | -2.85056600 | -1.32819900 |
| C | 7.46864700  | -0.38999700 | -1.13702400 |
| C | 6.99433300  | -4.06280600 | -1.40701100 |
| C | 6.84736300  | -1.63468300 | -1.22202600 |
| C | 6.71383100  | 0.79853000  | -1.02495400 |
| C | 5.57137000  | -4.15835200 | -1.38623000 |
| H | 7.57010500  | -4.98449400 | -1.48727900 |
| C | 5.41365600  | -1.72828900 | -1.19979000 |
| C | 5.27314800  | 0.71590200  | -0.98967100 |
| C | 4.79200800  | -3.02391100 | -1.28631000 |
| H | 5.12391500  | -5.14710500 | -1.45145300 |
| C | 4.63525800  | -0.55153200 | -1.09616800 |
| C | 3.32018600  | -3.08764800 | -1.26167500 |
| C | 3.18323800  | -0.62470000 | -1.08065100 |
| C | 2.66741300  | -4.32112500 | -1.29358500 |
| C | 2.55421600  | -1.89966100 | -1.17848200 |
| C | 2.42810200  | 0.55255200  | -0.91858900 |
| C | 1.28661100  | -4.39641500 | -1.27626700 |
| H | 3.24983900  | -5.23956800 | -1.32439800 |
| C | 1.12499300  | -1.98270300 | -1.15244900 |
| C | 0.97735700  | 0.46658600  | -0.85220400 |
| C | 0.49442300  | -3.24250100 | -1.23083700 |
| H | 0.82855900  | -5.37640900 | -1.27135400 |
| C | 0.33978200  | -0.79110900 | -0.97141100 |
| C | -0.96455400 | -3.32087800 | -1.21447900 |
| C | -1.07683300 | -0.87995700 | -0.86483000 |
| C | -1.63641200 | -4.53414400 | -1.41794400 |
| C | -1.72764500 | -2.15572900 | -0.98389800 |
| C | -1.83820100 | 0.28170500  | -0.61390500 |
| C | -3.01362500 | -4.63165900 | -1.33547800 |
| H | -1.07166500 | -5.42830000 | -1.65955000 |
| C | -3.15360000 | -2.25163100 | -0.88445500 |
| C | -3.28270200 | 0.18330500  | -0.46731000 |

|   |             |             |             |
|---|-------------|-------------|-------------|
| C | -3.78666200 | -3.50546700 | -1.05041900 |
| H | -3.48489200 | -5.59742900 | -1.49385000 |
| C | -3.91016500 | -1.07482400 | -0.61078300 |
| C | -5.25009200 | -3.61296000 | -0.93414100 |
| C | -5.35520300 | -1.17389600 | -0.48133300 |
| C | -5.91613400 | -4.81186200 | -1.08881600 |
| C | -6.00499800 | -2.41884700 | -0.64020400 |
| C | -6.11590000 | -0.00849300 | -0.19106700 |
| C | -7.33676400 | -4.89863400 | -0.96437800 |
| H | -5.36489100 | -5.73147100 | -1.31110500 |
| C | -7.43413500 | -2.50656000 | -0.51036100 |
| C | -7.54401300 | -0.10459800 | -0.05427400 |
| C | -8.07661300 | -3.78691100 | -0.68328100 |
| H | -7.80960400 | -5.87316800 | -1.09800000 |
| C | -8.17489400 | -1.36094300 | -0.21988100 |
| H | 8.29452500  | 4.56954900  | -0.78638200 |
| H | 8.41698800  | 2.12219500  | -0.97907900 |
| H | 8.55248400  | -0.32254700 | -1.16218900 |
| H | 8.70137200  | -2.76909200 | -1.34524600 |
| H | -9.16160400 | -3.83989100 | -0.58355000 |
| H | -9.26157500 | -1.42757300 | -0.11738800 |
| H | -9.37890600 | 0.97840800  | 0.34841800  |
| H | -9.51483900 | 3.38849300  | 0.81281600  |
| N | 5.64519000  | -1.51509600 | 3.52319700  |
| H | 5.88837600  | -2.38054700 | 3.04091500  |
| C | 4.19228100  | -1.40287000 | 3.53649600  |
| H | 3.89915400  | -0.55642600 | 4.16442500  |
| C | 3.55220300  | -1.25267700 | 2.13717800  |
| C | 3.65290600  | -2.67533400 | 4.15945500  |
| H | 3.93253700  | -0.31975900 | 1.69611700  |
| H | 3.92665400  | -2.07671000 | 1.51259500  |
| C | 2.04546700  | -1.25050600 | 2.14686700  |
| O | 3.98628600  | -3.78382500 | 3.81557300  |
| C | 1.32494500  | -0.06825400 | 2.31701300  |
| C | 1.32911200  | -2.44655300 | 2.02335000  |
| H | 1.85952400  | 0.87812900  | 2.39250200  |
| C | -0.06716700 | -0.06735000 | 2.34854100  |
| C | -0.05995200 | -2.46330700 | 2.04651800  |
| H | 1.87451200  | -3.37731400 | 1.87115200  |
| H | -0.61207100 | 0.86856800  | 2.45264600  |
| C | -0.75934400 | -1.26737900 | 2.20309600  |
| H | -0.61782200 | -3.38424700 | 1.91287300  |
| H | 6.03624000  | -0.75132400 | 2.97311600  |
| O | 2.72300400  | -2.45225100 | 5.09992900  |
| H | 2.39528500  | -3.32498800 | 5.37891200  |
| O | -2.12340300 | -1.32692300 | 2.16142000  |
| H | -2.47717000 | -0.42647600 | 2.17956500  |



Graphene-Phe

|   |             |             |             |
|---|-------------|-------------|-------------|
| C | -5.58339200 | 1.17131200  | -0.09188800 |
| C | -6.35096500 | 2.34949400  | 0.05067300  |
| C | -4.13603100 | 1.24233300  | -0.22001700 |
| C | -8.40659500 | 1.02067100  | 0.15993000  |
| C | -7.78046800 | 2.26751900  | 0.17538600  |
| C | -5.71691600 | 3.64543000  | 0.07234400  |
| C | -3.49879200 | 2.51856400  | -0.18633000 |
| C | -8.54369500 | 3.48386000  | 0.31474200  |
| C | -6.49508500 | 4.77710000  | 0.20787600  |
| C | -4.25141000 | 3.70894600  | -0.04866000 |
| C | -2.07131800 | 2.58822800  | -0.29624400 |
| C | -7.91611600 | 4.69568900  | 0.32883200  |
| H | -6.03617700 | 5.77094400  | 0.22619200  |
| C | -3.59433800 | 4.93869500  | -0.03758900 |
| C | -1.30051800 | 1.38851600  | -0.47606800 |
| C | -1.42742200 | 3.84517100  | -0.23895800 |
| H | -8.48101200 | 5.62364300  | 0.43268300  |
| C | -2.21566100 | 4.99869800  | -0.13462400 |
| H | -4.15788200 | 5.86376800  | 0.04531100  |
| C | 0.11511900  | 1.46523400  | -0.61171500 |
| C | 0.03188700  | 3.91694400  | -0.29935600 |
| H | -1.74568300 | 5.97628200  | -0.13888800 |
| C | 0.77936700  | 2.73821300  | -0.51137500 |
| C | 0.71095600  | 5.13127900  | -0.14099800 |
| C | 2.20794300  | 2.80792900  | -0.60434500 |
| C | 2.08864500  | 5.20300500  | -0.23365400 |
| H | 0.16638300  | 6.04160200  | 0.06965400  |
| C | 2.95517800  | 1.61254100  | -0.81880700 |
| C | 2.85400400  | 4.06151200  | -0.47559500 |
| H | 2.57927700  | 6.16652000  | -0.11137500 |
| C | 4.40321700  | 1.69467100  | -0.91351500 |
| C | 4.32036700  | 4.15631600  | -0.58367200 |
| C | 5.06217600  | 2.94182300  | -0.79999100 |
| C | 4.98441200  | 5.36233500  | -0.48325500 |
| C | 6.49401100  | 3.00248800  | -0.90208000 |
| H | 4.44485700  | 6.29210400  | -0.32228700 |
| C | 6.40526900  | 5.42030500  | -0.59055300 |
| C | 7.14060300  | 4.28757600  | -0.79171600 |
| C | 7.23189900  | 1.83591500  | -1.09843600 |
| H | 6.88793800  | 6.39356400  | -0.50723400 |
| C | 7.45806200  | -3.06635300 | -1.64608200 |
| C | 7.33770200  | -0.61070900 | -1.38376100 |
| C | 6.82423000  | -4.27412600 | -1.70648500 |
| C | 6.70408100  | -1.84973100 | -1.46385300 |
| C | 6.59833000  | 0.57854700  | -1.20171700 |
| C | 5.40607500  | -4.36427700 | -1.58487800 |
| H | 7.38785500  | -5.19622800 | -1.84600500 |
| C | 5.27394000  | -1.93619700 | -1.35671700 |
| C | 5.15982200  | 0.50524300  | -1.10673700 |

|   |             |             |             |
|---|-------------|-------------|-------------|
| C | 4.64199800  | -3.22833700 | -1.41012700 |
| H | 4.94990300  | -5.35002500 | -1.63176700 |
| C | 4.50869300  | -0.75653600 | -1.19987700 |
| C | 3.17710100  | -3.28750500 | -1.26437600 |
| C | 3.05899900  | -0.82202300 | -1.10685700 |
| C | 2.52296400  | -4.51975900 | -1.22629200 |
| C | 2.42149100  | -2.09707600 | -1.13959700 |
| C | 2.31802300  | 0.36065400  | -0.92715900 |
| C | 1.14965300  | -4.59254000 | -1.08857100 |
| H | 3.09898600  | -5.44001900 | -1.29802200 |
| C | 0.99700500  | -2.17630000 | -1.00843600 |
| C | 0.86965100  | 0.28435500  | -0.80630500 |
| C | 0.36320500  | -3.43700900 | -0.99320100 |
| H | 0.69527300  | -5.57296400 | -1.04555500 |
| C | 0.22346000  | -0.97289900 | -0.84848700 |
| C | -1.09175500 | -3.51230300 | -0.86345600 |
| C | -1.19076600 | -1.04877500 | -0.69604100 |
| C | -1.76865800 | -4.73842400 | -0.89656300 |
| C | -1.84674900 | -2.32728100 | -0.70693200 |
| C | -1.94443700 | 0.13221100  | -0.52061000 |
| C | -3.14233800 | -4.82331100 | -0.75692100 |
| H | -1.21414500 | -5.65890700 | -1.04246200 |
| C | -3.27083100 | -2.40862400 | -0.56051400 |
| C | -3.38928400 | 0.05467500  | -0.37514400 |
| C | -3.90878200 | -3.67161900 | -0.58320200 |
| H | -3.61612500 | -5.80046000 | -0.78911100 |
| C | -4.02246900 | -1.20629600 | -0.39962200 |
| C | -5.37025000 | -3.76317800 | -0.43295800 |
| C | -5.46842200 | -1.28806700 | -0.26133500 |
| C | -6.03765200 | -4.97108400 | -0.43774300 |
| C | -6.12172100 | -2.54112900 | -0.27760100 |
| C | -6.22753000 | -0.09559300 | -0.11176300 |
| C | -7.45753000 | -5.04015600 | -0.29594600 |
| H | -5.48875600 | -5.91143400 | -0.55201300 |
| C | -7.55071900 | -2.61037000 | -0.13901900 |
| C | -7.65733000 | -0.17114900 | 0.01932200  |
| C | -8.19523700 | -3.90106600 | -0.15221200 |
| H | -7.93178900 | -6.02299300 | -0.30655800 |
| C | -8.29063300 | -1.43626000 | 0.00461500  |
| H | 8.22421500  | 4.32312400  | -0.87424800 |
| H | 8.31413600  | 1.88636100  | -1.17711500 |
| H | 8.41902500  | -0.54884400 | -1.46669000 |
| H | 8.53905200  | -2.98938900 | -1.73461100 |
| H | -9.28004600 | -3.93959000 | -0.04462200 |
| H | -9.37793000 | -1.48814000 | 0.10767400  |
| H | -9.49384400 | 0.95739800  | 0.25706800  |
| H | -9.62789300 | 3.40758400  | 0.40736000  |
| N | 6.05590500  | -1.05802700 | 3.26795800  |
| H | 6.17766400  | -1.98808400 | 2.86711200  |
| C | 4.62657700  | -0.82116400 | 3.41938600  |

|   |             |             |            |
|---|-------------|-------------|------------|
| H | 4.46783000  | 0.10919700  | 3.97276300 |
| C | 3.84745100  | -0.76794100 | 2.08480600 |
| C | 4.06404200  | -1.96956500 | 4.23306800 |
| H | 4.24768800  | 0.07321000  | 1.49766400 |
| H | 4.08000700  | -1.68705900 | 1.52893500 |
| C | 2.35796900  | -0.62327400 | 2.24873700 |
| O | 4.28878500  | -3.13236200 | 3.99797600 |
| C | 1.77686700  | 0.63489700  | 2.43134200 |
| C | 1.53270500  | -1.75137700 | 2.24671400 |
| H | 2.40906300  | 1.52177700  | 2.41245100 |
| C | 0.40121200  | 0.76441400  | 2.59438400 |
| C | 0.15623300  | -1.62580800 | 2.41647800 |
| H | 1.97824900  | -2.73302100 | 2.09113600 |
| H | -0.03786800 | 1.75160900  | 2.70728100 |
| C | -0.41391200 | -0.36644800 | 2.58466600 |
| H | -0.47287700 | -2.51067400 | 2.39022200 |
| H | -1.48883500 | -0.26395500 | 2.69487900 |
| H | 6.43553700  | -0.39475900 | 2.59328600 |
| O | 3.24059500  | -1.56890200 | 5.21331800 |
| H | 2.88031500  | -2.37584900 | 5.62027000 |

#### Graphene-His

|   |             |             |             |
|---|-------------|-------------|-------------|
| C | 5.43322300  | -1.14258400 | -0.27802400 |
| C | 6.15537800  | -2.35726300 | -0.28851600 |
| C | 3.98238800  | -1.14417600 | -0.38455400 |
| C | 8.26426700  | -1.12918000 | -0.07102500 |
| C | 7.58928700  | -2.34419100 | -0.18631900 |
| C | 5.47014100  | -3.62233400 | -0.40011500 |
| C | 3.29419500  | -2.38927700 | -0.48561600 |
| C | 8.30547200  | -3.59677500 | -0.20420900 |
| C | 6.20451500  | -4.79059000 | -0.41186600 |
| C | 4.00141800  | -3.61608700 | -0.49318100 |
| C | 1.86346200  | -2.39262800 | -0.57333200 |
| C | 7.62987700  | -4.77717900 | -0.31450500 |
| H | 5.70656100  | -5.76186000 | -0.49556600 |
| C | 3.29365900  | -4.81235400 | -0.58987800 |
| C | 1.13854800  | -1.15133600 | -0.58769700 |
| C | 1.16939800  | -3.62125700 | -0.63866400 |
| H | 8.15856200  | -5.73177100 | -0.32959600 |
| C | 1.91167400  | -4.80844500 | -0.65930600 |
| H | 3.81938900  | -5.76284200 | -0.60655700 |
| C | -0.28460600 | -1.16071700 | -0.66740500 |
| C | -0.29151600 | -3.63053000 | -0.68305100 |
| H | 1.40394300  | -5.76324600 | -0.73533500 |
| C | -0.99593300 | -2.40788300 | -0.71958500 |
| C | -1.01503600 | -4.82762000 | -0.68039200 |
| C | -2.42711000 | -2.41318000 | -0.76799300 |
| C | -2.39674800 | -4.83676400 | -0.72968100 |
| H | -0.50393500 | -5.77866000 | -0.61987100 |
| C | -3.13095800 | -1.17399600 | -0.79622000 |

|   |             |             |             |
|---|-------------|-------------|-------------|
| C | -3.12166600 | -3.64631600 | -0.78134600 |
| H | -2.92153100 | -5.78973400 | -0.72419400 |
| C | -4.58390200 | -1.18780900 | -0.86872700 |
| C | -4.59331200 | -3.67195200 | -0.84172000 |
| C | -5.29057200 | -2.41186700 | -0.88943300 |
| C | -5.30487100 | -4.85379900 | -0.85730600 |
| C | -6.72545000 | -2.40657700 | -0.96100000 |
| H | -4.80031600 | -5.81650000 | -0.81990300 |
| C | -6.73014300 | -4.84528400 | -0.92329800 |
| C | -7.42246800 | -3.67002400 | -0.97489400 |
| C | -7.41827300 | -1.19763500 | -1.01490400 |
| H | -7.24995600 | -5.80286200 | -0.93189900 |
| C | -7.45152900 | 3.73984600  | -1.09024000 |
| C | -7.42751300 | 1.26812400  | -1.05352100 |
| C | -6.77019900 | 4.92131400  | -1.05720000 |
| C | -6.74524800 | 2.48169200  | -1.02852800 |
| C | -6.73452100 | 0.03699200  | -0.99741500 |
| C | -5.34617300 | 4.94342900  | -0.95641400 |
| H | -7.29646200 | 5.87421200  | -1.10471900 |
| C | -5.31094900 | 2.50106100  | -0.93509100 |
| C | -5.29453700 | 0.04426100  | -0.91619100 |
| C | -4.62663700 | 3.76871900  | -0.89407100 |
| H | -4.85126300 | 5.91138500  | -0.92879600 |
| C | -4.59528000 | 1.28318700  | -0.88941700 |
| C | -3.15785400 | 3.75790800  | -0.77715800 |
| C | -3.14363800 | 1.28220200  | -0.79182200 |
| C | -2.44582400 | 4.95494600  | -0.70706400 |
| C | -2.45413700 | 2.52890200  | -0.73387400 |
| C | -2.44739400 | 0.05603200  | -0.75669600 |
| C | -1.06768600 | 4.95911300  | -0.58731300 |
| H | -2.97763100 | 5.90306700  | -0.74636000 |
| C | -1.02506900 | 2.53740600  | -0.61417700 |
| C | -0.99521900 | 0.06372700  | -0.67472900 |
| C | -0.33506400 | 3.76772000  | -0.52981100 |
| H | -0.56554200 | 5.91597100  | -0.54389700 |
| C | -0.30041500 | 1.29390000  | -0.59350000 |
| C | 1.12085900  | 3.76920500  | -0.38493700 |
| C | 1.12148300  | 1.29873600  | -0.48987100 |
| C | 1.84271900  | 4.96134600  | -0.24420100 |
| C | 1.82909700  | 2.54516900  | -0.38248400 |
| C | 1.83117900  | 0.07520700  | -0.49396400 |
| C | 3.22065300  | 4.97529700  | -0.12406900 |
| H | 1.32019500  | 5.91098000  | -0.22177600 |
| C | 3.25827300  | 2.55294900  | -0.26140300 |
| C | 3.28132800  | 0.08183700  | -0.38046000 |
| C | 3.94528100  | 3.78402300  | -0.13733700 |
| H | 3.73057700  | 5.92860000  | -0.01872900 |
| C | 3.96355700  | 1.31217000  | -0.26942100 |
| C | 5.41187600  | 3.80202900  | -0.01680700 |
| C | 5.41345300  | 1.32251200  | -0.15206900 |

|   |             |             |             |
|---|-------------|-------------|-------------|
| C | 6.12690900  | 4.97621600  | 0.10529500  |
| C | 6.11618200  | 2.54287600  | -0.03076300 |
| C | 6.12690000  | 0.09296100  | -0.16268700 |
| C | 7.55067100  | 4.97423700  | 0.21862300  |
| H | 5.61422500  | 5.94328500  | 0.11756100  |
| C | 7.54875000  | 2.54139500  | 0.08129600  |
| C | 7.56056400  | 0.09872900  | -0.05459700 |
| C | 8.24432800  | 3.79879000  | 0.20708500  |
| H | 8.06418200  | 5.93245900  | 0.31332500  |
| C | 8.24366100  | 1.33112000  | 0.06625500  |
| H | -8.50864200 | -3.65414200 | -1.02620000 |
| H | -8.50361800 | -1.19712600 | -1.07069400 |
| H | -8.51238200 | 1.25598700  | -1.11875000 |
| H | -8.53640900 | 3.71296600  | -1.16374200 |
| H | 9.33171500  | 3.78319300  | 0.29199400  |
| H | 9.33379900  | 1.32955800  | 0.14917900  |
| H | 9.35450000  | -1.11822800 | 0.00857000  |
| H | 9.39312700  | -3.57254300 | -0.12754400 |
| N | -4.33028600 | 1.66372000  | 2.45124100  |
| H | -5.33019300 | 1.48266000  | 2.52025100  |
| C | -3.61005300 | 0.40899100  | 2.63611900  |
| H | -3.76000900 | -0.32412400 | 1.81859700  |
| C | -2.11414800 | 0.71996000  | 2.73712000  |
| C | -4.21236400 | -0.23439700 | 3.87668300  |
| H | -1.89567000 | 1.43088900  | 1.92655300  |
| H | -1.94056200 | 1.25859800  | 3.67657500  |
| C | -1.18671700 | -0.44740000 | 2.61283000  |
| O | -5.38020400 | -0.16249200 | 4.16797200  |
| N | 0.17781100  | -0.25124200 | 2.55994500  |
| C | -1.33521100 | -1.80789400 | 2.52741900  |
| H | 0.64566000  | 0.64360100  | 2.55304700  |
| C | 0.76908700  | -1.47396600 | 2.45168400  |
| N | -0.11486600 | -2.43848000 | 2.42770000  |
| H | -2.25870100 | -2.37229200 | 2.54399800  |
| H | 1.84185500  | -1.59146200 | 2.38157500  |
| H | -4.14331100 | 2.02453500  | 1.51760000  |
| O | -3.32773700 | -0.91821900 | 4.62229800  |
| H | -3.83386600 | -1.30665400 | 5.35687600  |

#### Graphene-G

|   |            |             |             |
|---|------------|-------------|-------------|
| C | 4.94019700 | -1.08817100 | -0.55098500 |
| C | 5.66274400 | -2.30487500 | -0.62314600 |
| C | 3.48784300 | -1.09067300 | -0.59269800 |
| C | 7.77631200 | -1.06820500 | -0.45368600 |
| C | 7.09876500 | -2.28013000 | -0.58018200 |
| C | 4.98315300 | -3.56607000 | -0.74299400 |
| C | 2.80089900 | -2.33709400 | -0.68251600 |
| C | 7.81104900 | -3.53181400 | -0.66948900 |
| C | 5.70853600 | -4.73868200 | -0.82610700 |
| C | 3.50890100 | -3.55934200 | -0.75900500 |

|   |             |             |             |
|---|-------------|-------------|-------------|
| C | 1.36813200  | -2.35179200 | -0.67617600 |
| C | 7.13299500  | -4.71114900 | -0.79118500 |
| H | 5.21637600  | -5.70146400 | -0.92489700 |
| C | 2.79695300  | -4.75734600 | -0.85597800 |
| C | 0.63706700  | -1.11239900 | -0.62304000 |
| C | 0.67890300  | -3.58246900 | -0.70792000 |
| H | 7.66719100  | -5.65765900 | -0.86381500 |
| C | 1.41494800  | -4.76873000 | -0.83317400 |
| H | 3.33552200  | -5.69908200 | -0.95003900 |
| C | -0.78508500 | -1.12254800 | -0.59209900 |
| C | -0.77917100 | -3.59247100 | -0.58992200 |
| H | 0.90937700  | -5.72131400 | -0.92797600 |
| C | -1.49238800 | -2.37435100 | -0.55563200 |
| C | -1.49685100 | -4.79418000 | -0.47794600 |
| C | -2.92120800 | -2.39231300 | -0.45103600 |
| C | -2.87455500 | -4.81718500 | -0.38006100 |
| H | -0.96562600 | -5.73942100 | -0.45834900 |
| C | -3.62941500 | -1.15174300 | -0.41233200 |
| C | -3.60382200 | -3.62529800 | -0.37429300 |
| H | -3.38260500 | -5.77398600 | -0.29974100 |
| C | -5.08064900 | -1.17034600 | -0.33251400 |
| C | -5.07195900 | -3.65213100 | -0.27354400 |
| C | -5.78136100 | -2.39622900 | -0.25900900 |
| C | -5.78513000 | -4.83123700 | -0.19379200 |
| C | -7.21592100 | -2.40275400 | -0.17127500 |
| H | -5.26810300 | -5.79674000 | -0.20064300 |
| C | -7.21033300 | -4.83814800 | -0.10027400 |
| C | -7.90852500 | -3.66520900 | -0.08960300 |
| C | -7.91478500 | -1.19445400 | -0.16539500 |
| H | -7.72110700 | -5.80044400 | -0.03769300 |
| C | -7.98772500 | 3.73880000  | -0.33164000 |
| C | -7.94122800 | 1.26875000  | -0.24677800 |
| C | -7.31354100 | 4.92355300  | -0.40061900 |
| C | -7.26788300 | 2.48875100  | -0.32175000 |
| C | -7.23447600 | 0.04308600  | -0.24442600 |
| C | -5.88634000 | 4.94208700  | -0.45857100 |
| H | -7.84490100 | 5.87674000  | -0.40956700 |
| C | -5.83200600 | 2.50788500  | -0.38669700 |
| C | -5.79818200 | 0.05586600  | -0.32089600 |
| C | -5.14777900 | 3.77609300  | -0.45171800 |
| H | -5.38845000 | 5.91664500  | -0.50642900 |
| C | -5.10589400 | 1.29469200  | -0.38741100 |
| C | -3.67636200 | 3.77635300  | -0.49363800 |
| C | -3.65327200 | 1.30210800  | -0.44334000 |
| C | -2.97123500 | 4.97991000  | -0.54855400 |
| C | -2.96737100 | 2.55476500  | -0.48346500 |
| C | -2.94996200 | 0.08160000  | -0.46652700 |
| C | -1.58936400 | 4.98128100  | -0.54965400 |
| H | -3.50058800 | 5.92760800  | -0.58549900 |
| C | -1.53559800 | 2.56317900  | -0.50015300 |

|   |             |             |             |
|---|-------------|-------------|-------------|
| C | -1.49746700 | 0.09555100  | -0.53777500 |
| C | -0.84618600 | 3.79363500  | -0.49316000 |
| H | -1.07861800 | 5.93611000  | -0.60438600 |
| C | -0.80590300 | 1.32440400  | -0.53925500 |
| C | 0.61442200  | 3.80892800  | -0.41965300 |
| C | 0.61631000  | 1.33861400  | -0.54785500 |
| C | 1.32847300  | 5.00488600  | -0.26142100 |
| C | 1.32613400  | 2.59115300  | -0.46926000 |
| C | 1.33283500  | 0.11974600  | -0.58347600 |
| C | 2.70942000  | 5.01460800  | -0.18925800 |
| H | 0.80560900  | 5.94845900  | -0.17354400 |
| C | 2.75746000  | 2.59726400  | -0.39340700 |
| C | 2.78742700  | 0.12890200  | -0.54166900 |
| C | 3.44325900  | 3.82818600  | -0.25987400 |
| H | 3.22872800  | 5.96369300  | -0.06816200 |
| C | 3.46692900  | 1.35817800  | -0.43247800 |
| C | 4.91502000  | 3.85374900  | -0.17820900 |
| C | 4.91784600  | 1.37485000  | -0.36822500 |
| C | 5.61774200  | 5.03541400  | -0.04704400 |
| C | 5.61687400  | 2.60018800  | -0.23891500 |
| C | 5.63446600  | 0.14755200  | -0.43157500 |
| C | 7.04114600  | 5.02565200  | 0.02546300  |
| H | 5.10860200  | 5.99355700  | -0.00172000 |
| C | 7.05241200  | 2.59340500  | -0.17269700 |
| C | 7.07847600  | 0.15646100  | -0.37489500 |
| C | 7.74052200  | 3.85414100  | -0.03454700 |
| H | 7.55686900  | 5.97964700  | 0.12843500  |
| C | 7.75249100  | 1.38979600  | -0.24119500 |
| H | -8.99720000 | -3.65609200 | -0.01872500 |
| H | -9.00668200 | -1.19887900 | -0.09856400 |
| H | -9.03352900 | 1.25375100  | -0.18889900 |
| H | -9.07720800 | 3.71038800  | -0.28230400 |
| H | 8.82597200  | 3.83963300  | 0.01752000  |
| H | 8.83688300  | 1.39117100  | -0.19455400 |
| H | 8.86099900  | -1.05584600 | -0.41726900 |
| H | 8.89707200  | -3.50372500 | -0.64032600 |
| C | 1.23672500  | 0.05617400  | 2.55954900  |
| C | 1.32439100  | -2.15066300 | 2.44890500  |
| C | -0.92184100 | -1.06150800 | 2.50332000  |
| C | -0.14948700 | 0.15117800  | 2.58746700  |
| N | -0.04858900 | -2.18704800 | 2.45121100  |
| N | 2.02069100  | -1.04992600 | 2.51496300  |
| N | -0.55381100 | 1.46924500  | 2.62273100  |
| N | 1.67959700  | 1.34448500  | 2.58379600  |
| C | 0.56039900  | 2.14761400  | 2.61339600  |
| H | 0.64279800  | 3.22647100  | 2.61910300  |
| H | 2.64397700  | 1.63252300  | 2.47395700  |
| O | -2.12375000 | -1.23413900 | 2.43935400  |
| H | -0.52394300 | -3.06302800 | 2.26190700  |
| N | 1.96398700  | -3.35093000 | 2.30966700  |

|   |            |             |            |
|---|------------|-------------|------------|
| H | 2.97132500 | -3.28622800 | 2.38415200 |
| H | 1.54820800 | -4.17383500 | 2.72012400 |

Graphene-A

|   |             |             |             |
|---|-------------|-------------|-------------|
| C | 4.95668200  | -1.19544900 | -0.51713700 |
| C | 5.66746100  | -2.41526500 | -0.57696400 |
| C | 3.50123900  | -1.18630600 | -0.52629800 |
| C | 7.79487800  | -1.19673800 | -0.50714800 |
| C | 7.10391800  | -2.40565100 | -0.57948000 |
| C | 4.97184800  | -3.67684400 | -0.63215300 |
| C | 2.80178400  | -2.42481900 | -0.56305700 |
| C | 7.80530200  | -3.66494100 | -0.65648400 |
| C | 5.68805300  | -4.85359000 | -0.70419200 |
| C | 3.49951200  | -3.65763700 | -0.60388600 |
| C | 1.36920900  | -2.42554100 | -0.53805800 |
| C | 7.11546700  | -4.84086700 | -0.71833300 |
| H | 5.18531000  | -5.81767700 | -0.74982200 |
| C | 2.77773500  | -4.84985600 | -0.61600700 |
| C | 0.65241400  | -1.18202500 | -0.51284400 |
| C | 0.66686400  | -3.65254300 | -0.52091500 |
| H | 7.63745100  | -5.79543300 | -0.77771500 |
| C | 1.39369100  | -4.84598700 | -0.57551700 |
| H | 3.30336300  | -5.80143800 | -0.65514200 |
| C | -0.77385800 | -1.17801000 | -0.48618400 |
| C | -0.79276900 | -3.64801600 | -0.43943300 |
| H | 0.88354800  | -5.79957000 | -0.59123800 |
| C | -1.49336400 | -2.41847400 | -0.44176500 |
| C | -1.52583300 | -4.83512800 | -0.34247100 |
| C | -2.92587000 | -2.41819700 | -0.37868600 |
| C | -2.90974500 | -4.84220600 | -0.28076300 |
| H | -1.01105800 | -5.78856600 | -0.30296600 |
| C | -3.62256900 | -1.17475600 | -0.38669400 |
| C | -3.62698200 | -3.64882800 | -0.30657200 |
| H | -3.42905700 | -5.79399400 | -0.20839400 |
| C | -5.07751600 | -1.17671900 | -0.33667000 |
| C | -5.09784900 | -3.65879700 | -0.25184500 |
| C | -5.79240800 | -2.39295600 | -0.27540200 |
| C | -5.82451400 | -4.82910800 | -0.18432500 |
| C | -7.22896400 | -2.38201200 | -0.23346400 |
| H | -5.32096600 | -5.79961500 | -0.16444400 |
| C | -7.25277900 | -4.81710000 | -0.13896100 |
| C | -7.93753200 | -3.63733500 | -0.16378600 |
| C | -7.91424300 | -1.16747500 | -0.26103200 |
| H | -7.77596800 | -5.77288400 | -0.08513300 |
| C | -7.92647900 | 3.76613700  | -0.44122900 |
| C | -7.91056700 | 1.29595300  | -0.35302100 |
| C | -7.23799800 | 4.94303700  | -0.48950200 |
| C | -7.22151600 | 2.50722500  | -0.40698100 |
| C | -7.21759800 | 0.06242600  | -0.32291800 |
| C | -5.80902200 | 4.94819100  | -0.50335000 |



|   |             |             |             |
|---|-------------|-------------|-------------|
| H | -7.75857000 | 5.90132900  | -0.51673400 |
| C | -5.78436900 | 2.51157800  | -0.42774800 |
| C | -5.78086900 | 0.05921000  | -0.35550400 |
| C | -5.08548200 | 3.77422400  | -0.47241100 |
| H | -5.30206000 | 5.91666900  | -0.53800400 |
| C | -5.07309500 | 1.29207900  | -0.40416500 |
| C | -3.61366800 | 3.75770900  | -0.47570400 |
| C | -3.61757000 | 1.28428000  | -0.42723500 |
| C | -2.89362000 | 4.95029400  | -0.51435000 |
| C | -2.91716000 | 2.52457200  | -0.44979800 |
| C | -2.92572100 | 0.05290100  | -0.42459200 |
| C | -1.50941800 | 4.93642300  | -0.49476600 |
| H | -3.41171800 | 5.90423600  | -0.56066900 |
| C | -1.48412700 | 2.51664900  | -0.44179900 |
| C | -1.47332600 | 0.04954000  | -0.46292900 |
| C | -0.78072600 | 3.74319300  | -0.42933300 |
| H | -0.98803700 | 5.88619800  | -0.54419200 |
| C | -0.76816800 | 1.27386500  | -0.46534500 |
| C | 0.67894000  | 3.74144000  | -0.35548600 |
| C | 0.65668900  | 1.27226200  | -0.47574300 |
| C | 1.40504000  | 4.92772100  | -0.19841600 |
| C | 1.37782900  | 2.51433000  | -0.41473200 |
| C | 1.35984500  | 0.04378500  | -0.50194700 |
| C | 2.78904900  | 4.92684900  | -0.15552300 |
| H | 0.89262400  | 5.87477500  | -0.09419000 |
| C | 2.81111900  | 2.50835900  | -0.36714400 |
| C | 2.81346800  | 0.04010100  | -0.48571100 |
| C | 3.51015800  | 3.73747600  | -0.25168900 |
| H | 3.31574100  | 5.87185200  | -0.04093700 |
| C | 3.50667200  | 1.26736300  | -0.41176800 |
| C | 4.98236100  | 3.75175000  | -0.21787900 |
| C | 4.96062800  | 1.27223400  | -0.38184000 |
| C | 5.70117400  | 4.92535300  | -0.12561000 |
| C | 5.67351900  | 2.48856800  | -0.28950000 |
| C | 5.66508100  | 0.03673600  | -0.44504900 |
| C | 7.12860500  | 4.90757300  | -0.10165700 |
| H | 5.20173100  | 5.89043000  | -0.07368000 |
| C | 7.11067600  | 2.47358800  | -0.26919900 |
| C | 7.10571900  | 0.03417900  | -0.43214100 |
| C | 7.81497100  | 3.73044900  | -0.17116700 |
| H | 7.65309600  | 5.85979000  | -0.02828400 |
| C | 7.79792100  | 1.26423800  | -0.34316500 |
| H | -9.02698000 | -3.61458000 | -0.13133100 |
| H | -9.00605000 | -1.15865400 | -0.23383800 |
| H | -9.00265700 | 1.29181800  | -0.33321200 |
| H | -9.01657900 | 3.74842300  | -0.42754600 |
| H | 8.90244300  | 3.70696400  | -0.15575000 |
| H | 8.88500700  | 1.25538600  | -0.33208400 |
| H | 8.88208800  | -1.19241300 | -0.50557200 |
| H | 8.89294400  | -3.64533600 | -0.66289800 |

|   |             |             |            |
|---|-------------|-------------|------------|
| C | 1.39933900  | -0.06756000 | 2.65117200 |
| C | 1.23209800  | -2.25899400 | 2.57567000 |
| C | -0.74241800 | -1.08500300 | 2.67058200 |
| C | 0.01612300  | 0.10075100  | 2.69849800 |
| H | 1.69526200  | -3.24259900 | 2.50880900 |
| N | -0.11218600 | -2.26160600 | 2.60414700 |
| N | 2.06469600  | -1.22594000 | 2.59663600 |
| N | -2.09938400 | -1.06499500 | 2.71302400 |
| H | -2.57254000 | -1.91743400 | 2.44949900 |
| H | -2.56043200 | -0.18872100 | 2.51529100 |
| N | -0.33139900 | 1.43879300  | 2.71775300 |
| N | 1.90038700  | 1.20887400  | 2.64458400 |
| C | 0.81911100  | 2.05679500  | 2.67513100 |
| H | 0.95033000  | 3.13135900  | 2.65320300 |
| H | 2.87205900  | 1.45989000  | 2.51506300 |

#### Graphene-T

|   |             |            |             |
|---|-------------|------------|-------------|
| C | -4.85860900 | 1.58024500 | -0.30066700 |
| C | -5.54385600 | 2.80679900 | -0.13404300 |
| C | -3.40597000 | 1.54471200 | -0.33097200 |
| C | -7.69501900 | 1.63165000 | -0.24533000 |
| C | -6.98080700 | 2.81991600 | -0.10673200 |
| C | -4.82606600 | 4.04658800 | 0.00623200  |
| C | -2.68204400 | 2.76593700 | -0.20324900 |
| C | -7.65562500 | 4.08406200 | 0.06763000  |
| C | -5.51637900 | 5.23042400 | 0.17042000  |
| C | -3.35353700 | 4.00171500 | -0.03298700 |
| C | -1.24899900 | 2.74255900 | -0.24201000 |
| C | -6.94243100 | 5.24033500 | 0.20075400  |
| H | -4.99568600 | 6.17806000 | 0.27711900  |
| C | -2.60589200 | 5.17071400 | 0.10864100  |
| C | -0.55603200 | 1.48766600 | -0.37957100 |
| C | -0.52230100 | 3.94889400 | -0.13002800 |
| H | -7.44664200 | 6.19704500 | 0.33209300  |
| C | -1.22289400 | 5.14462400 | 0.06630900  |
| H | -3.11377900 | 6.12141500 | 0.25861700  |
| C | 0.86872100  | 1.45392700 | -0.35721700 |
| C | 0.93878700  | 3.92011100 | -0.20414200 |
| H | -0.69096600 | 6.07667400 | 0.20301800  |
| C | 1.61412300  | 2.68209600 | -0.27390000 |
| C | 1.69699100  | 5.09938200 | -0.21113600 |
| C | 3.04658600  | 2.65465700 | -0.27610100 |
| C | 3.07931600  | 5.08029200 | -0.22653100 |
| H | 1.19752900  | 6.06190700 | -0.21407100 |
| C | 3.71656000  | 1.39282600 | -0.30481200 |
| C | 3.77076700  | 3.86802600 | -0.24204000 |
| H | 3.62032600  | 6.02214000 | -0.22489900 |
| C | 5.16950900  | 1.36583800 | -0.26344700 |
| C | 5.24240500  | 3.84786500 | -0.22712400 |
| C | 5.91078300  | 2.56943000 | -0.22573200 |

|   |             |             |             |
|---|-------------|-------------|-------------|
| C | 5.99575300  | 5.00428700  | -0.20526000 |
| C | 7.34653000  | 2.52984500  | -0.18582700 |
| H | 5.51049400  | 5.98598400  | -0.20896200 |
| C | 7.42301600  | 4.96516500  | -0.17500600 |
| C | 8.08244200  | 3.76991500  | -0.16245800 |
| C | 8.00523300  | 1.29882800  | -0.16833900 |
| H | 7.96723100  | 5.91099700  | -0.15994200 |
| C | 7.91109700  | -3.63679600 | -0.17602200 |
| C | 7.94842900  | -1.16540100 | -0.17251900 |
| C | 7.19746000  | -4.79943800 | -0.21459900 |
| C | 7.23417000  | -2.36307600 | -0.20869700 |
| C | 7.28298700  | 0.08361400  | -0.19849100 |
| C | 5.77118600  | -4.77200400 | -0.29167900 |
| H | 7.69610800  | -5.76989100 | -0.18807000 |
| C | 5.79837900  | -2.33609500 | -0.27912900 |
| C | 5.84629900  | 0.11665000  | -0.25471500 |
| C | 5.07273500  | -3.58204700 | -0.32695500 |
| H | 5.24183700  | -5.73030700 | -0.32286000 |
| C | 5.11301000  | -1.09998500 | -0.30196700 |
| C | 3.60451500  | -3.53373300 | -0.41652400 |
| C | 3.66116200  | -1.06143100 | -0.36984100 |
| C | 2.85904600  | -4.71359800 | -0.45946700 |
| C | 2.93684400  | -2.28902600 | -0.44880900 |
| C | 2.99769200  | 0.18286200  | -0.36990800 |
| C | 1.48071000  | -4.66984600 | -0.55379600 |
| H | 3.35394700  | -5.67938700 | -0.41178000 |
| C | 1.50847300  | -2.25006900 | -0.55204100 |
| C | 1.54514500  | 0.21654600  | -0.43007100 |
| C | 0.77914500  | -3.45678800 | -0.62429900 |
| H | 0.93751700  | -5.60805800 | -0.56160800 |
| C | 0.81732100  | -0.98818100 | -0.53971900 |
| C | -0.67890400 | -3.42412200 | -0.73624900 |
| C | -0.60566200 | -0.95718700 | -0.58404300 |
| C | -1.43098900 | -4.59552700 | -0.87143800 |
| C | -1.35184500 | -2.18311900 | -0.68280000 |
| C | -1.28616200 | 0.28182100  | -0.49675100 |
| C | -2.81244800 | -4.56436600 | -0.91011800 |
| H | -0.94261100 | -5.55771000 | -0.94461800 |
| C | -2.78360100 | -2.14708400 | -0.71754000 |
| C | -2.74139600 | 0.31142300  | -0.48719600 |
| C | -3.50790700 | -3.35813100 | -0.82718600 |
| H | -3.36113300 | -5.49934000 | -1.00147500 |
| C | -3.45605900 | -0.89443100 | -0.60896000 |
| C | -4.98156000 | -3.34361100 | -0.84974600 |
| C | -4.91006300 | -0.87314100 | -0.59065800 |
| C | -5.72166900 | -4.50033000 | -0.98648900 |
| C | -5.64732900 | -2.07432800 | -0.71421800 |
| C | -5.58994700 | 0.36692400  | -0.43506200 |
| C | -7.14705800 | -4.45399000 | -0.99013900 |
| H | -5.24027800 | -5.46940500 | -1.09046600 |

|   |             |             |             |
|---|-------------|-------------|-------------|
| C | -7.08332700 | -2.03187400 | -0.70553600 |
| C | -7.03326000 | 0.39463800  | -0.41250500 |
| C | -7.81129900 | -3.26907200 | -0.85265200 |
| H | -7.69114500 | -5.39108500 | -1.10336300 |
| C | -7.74697200 | -0.81492700 | -0.55442400 |
| H | 9.17216800  | 3.72604300  | -0.13510600 |
| H | 9.09792200  | 1.26853300  | -0.13073000 |
| H | 9.04083800  | -1.18510500 | -0.12229300 |
| H | 9.00048600  | -3.64354300 | -0.11886500 |
| H | -8.89748900 | -3.22575000 | -0.85122000 |
| H | -8.83253700 | -0.78774900 | -0.54591700 |
| H | -8.78070600 | 1.64630600  | -0.22753900 |
| H | -8.74255900 | 4.08339400  | 0.08785900  |
| C | -1.53641000 | -0.32616000 | 2.57633800  |
| C | 0.72012200  | -1.23324000 | 2.48659900  |
| C | -1.29322600 | -2.72614700 | 2.48035000  |
| C | -2.13965700 | -1.52967500 | 2.56724200  |
| N | 0.08634900  | -2.45989900 | 2.46224300  |
| N | -0.16329700 | -0.17634200 | 2.55144600  |
| O | -1.69560000 | -3.87000400 | 2.41892400  |
| H | 0.69687800  | -3.26474700 | 2.37851200  |
| C | -3.62196900 | -1.72877800 | 2.62688900  |
| H | -3.94548100 | -2.43178600 | 1.85181500  |
| H | -3.92615800 | -2.15088400 | 3.59036700  |
| H | -4.15021200 | -0.78132300 | 2.47587600  |
| O | 1.92773300  | -1.09686800 | 2.44142400  |
| H | 0.25679300  | 0.74140500  | 2.49828200  |
| H | -2.10072700 | 0.60250800  | 2.59289100  |

#### Graphene-C

|   |             |             |             |
|---|-------------|-------------|-------------|
| C | -5.13086700 | -1.14026900 | -0.28892200 |
| C | -5.82861300 | -2.37141100 | -0.29313700 |
| C | -3.67935000 | -1.11388300 | -0.35603400 |
| C | -7.96614700 | -1.17345400 | -0.16273900 |
| C | -7.26453300 | -2.37559500 | -0.23079400 |
| C | -5.12431700 | -3.62431600 | -0.36249600 |
| C | -2.96790000 | -2.34725300 | -0.42943700 |
| C | -7.95138500 | -3.64485100 | -0.24062400 |
| C | -5.82558900 | -4.81328100 | -0.37033700 |
| C | -3.65245200 | -3.58698200 | -0.42302600 |
| C | -1.53493600 | -2.33213400 | -0.49673900 |
| C | -7.25025200 | -4.81431500 | -0.30896500 |
| H | -5.31484400 | -5.77040800 | -0.42618300 |
| C | -2.91704400 | -4.77215500 | -0.46166300 |
| C | -0.82865500 | -1.07684400 | -0.49119900 |
| C | -0.81966900 | -3.55014200 | -0.54657900 |
| H | -7.76402300 | -5.77492100 | -0.31874300 |
| C | -1.53492500 | -4.75497400 | -0.51405800 |
| H | -3.43555600 | -5.72907700 | -0.44515500 |
| C | 0.59443500  | -1.05984500 | -0.50812300 |

|   |             |             |             |
|---|-------------|-------------|-------------|
| C | 0.64195600  | -3.52779700 | -0.60194700 |
| H | -1.01421000 | -5.70294100 | -0.52798000 |
| C | 1.32787300  | -2.29815400 | -0.56515100 |
| C | 1.38984100  | -4.71312800 | -0.66687300 |
| C | 2.76020000  | -2.28777900 | -0.54921500 |
| C | 2.76831000  | -4.71013400 | -0.65934400 |
| H | 0.88356800  | -5.66983100 | -0.72186400 |
| C | 3.44472600  | -1.03792200 | -0.47622300 |
| C | 3.47011800  | -3.50641700 | -0.58070100 |
| H | 3.29859900  | -5.65671100 | -0.69517500 |
| C | 4.89694800  | -1.02636900 | -0.45553000 |
| C | 4.94068200  | -3.50542900 | -0.54212100 |
| C | 5.62479400  | -2.23872600 | -0.48234700 |
| C | 5.67887600  | -4.67274100 | -0.54324800 |
| C | 7.06337900  | -2.21902000 | -0.44833700 |
| H | 5.17841900  | -5.64762100 | -0.56845200 |
| C | 7.10698300  | -4.65490500 | -0.50770300 |
| C | 7.78280600  | -3.47025600 | -0.46403300 |
| C | 7.73708400  | -1.00094000 | -0.39257200 |
| H | 7.63727700  | -5.60902500 | -0.51233400 |
| C | 7.70775400  | 3.93163800  | -0.21181800 |
| C | 7.71136500  | 1.46104500  | -0.30716500 |
| C | 7.00971300  | 5.10521200  | -0.17181600 |
| C | 7.01177100  | 2.67145600  | -0.26930800 |
| C | 7.02921600  | 0.22698500  | -0.36516600 |
| C | 5.58292300  | 5.09811000  | -0.18325300 |
| H | 7.52411300  | 6.06686100  | -0.12969700 |
| C | 5.57645600  | 2.66421000  | -0.28604300 |
| C | 5.59068300  | 0.21290100  | -0.39110300 |
| C | 4.86705800  | 3.91808300  | -0.23538600 |
| H | 5.06534500  | 6.06265400  | -0.14869800 |
| C | 4.87325100  | 1.43702800  | -0.34921000 |
| C | 3.39560900  | 3.89087600  | -0.24052200 |
| C | 3.42013400  | 1.41655100  | -0.37100200 |
| C | 2.66658000  | 5.07932600  | -0.16797300 |
| C | 2.70920000  | 2.65746300  | -0.30818500 |
| C | 2.73932200  | 0.18562100  | -0.43924600 |
| C | 1.28511900  | 5.05597300  | -0.16475300 |
| H | 3.17808100  | 6.03580700  | -0.11070900 |
| C | 1.27512700  | 2.63974200  | -0.31135400 |
| C | 1.28362700  | 0.17108500  | -0.45383500 |
| C | 0.56121600  | 3.85665100  | -0.23494000 |
| H | 0.76003100  | 6.00211800  | -0.10149400 |
| C | 0.56868500  | 1.38664600  | -0.37499700 |
| C | -0.90231300 | 3.84436800  | -0.22469200 |
| C | -0.85595100 | 1.37336900  | -0.35904600 |
| C | -1.64467600 | 5.02972300  | -0.16144400 |
| C | -1.58865800 | 2.61033400  | -0.27178700 |
| C | -1.54807300 | 0.14024700  | -0.40723700 |
| C | -3.02737700 | 5.01352600  | -0.13221600 |

|   |             |             |             |
|---|-------------|-------------|-------------|
| H | -1.14798200 | 5.99016900  | -0.13508500 |
| C | -3.02141000 | 2.58972600  | -0.23609600 |
| C | -3.00257400 | 0.12220200  | -0.34669000 |
| C | -3.73394100 | 3.81138800  | -0.16300800 |
| H | -3.56818000 | 5.95653000  | -0.08133900 |
| C | -3.70536200 | 1.33942700  | -0.26593600 |
| C | -5.20693500 | 3.81204200  | -0.11568000 |
| C | -5.15833700 | 1.32895200  | -0.20586100 |
| C | -5.93459600 | 4.98316700  | -0.05079700 |
| C | -5.88337600 | 2.54224800  | -0.13305700 |
| C | -5.84976800 | 0.08599700  | -0.21671500 |
| C | -7.35942000 | 4.94932800  | 0.00212500  |
| H | -5.44481200 | 5.95299600  | -0.03874900 |
| C | -7.31871500 | 2.51070100  | -0.07619900 |
| C | -7.29251200 | 0.06756200  | -0.15453800 |
| C | -8.03405600 | 3.76254700  | -0.00837600 |
| H | -7.89431700 | 5.89699500  | 0.05182500  |
| C | -7.99364800 | 1.29136600  | -0.08619500 |
| H | 8.87315800  | -3.44178800 | -0.43604700 |
| H | 8.83080300  | -0.98368400 | -0.36652700 |
| H | 8.80526300  | 1.46748300  | -0.29040300 |
| H | 8.79874600  | 3.92310600  | -0.20128000 |
| H | -9.11984800 | 3.72796400  | 0.03279500  |
| H | -9.07842300 | 1.27194000  | -0.04221500 |
| H | -9.05087500 | -1.18110200 | -0.11665800 |
| H | -9.03731000 | -3.63747600 | -0.19391400 |
| H | -0.38596300 | -3.30817400 | 2.38556300  |
| N | 0.04218600  | -2.39993600 | 2.51705500  |
| C | 1.45760000  | -2.39536300 | 2.49412800  |
| C | -0.70884500 | -1.27691700 | 2.61272500  |
| N | 2.06587700  | -1.16896100 | 2.57909700  |
| O | 2.03955300  | -3.45751600 | 2.36932500  |
| C | -0.10432000 | -0.06954500 | 2.71746000  |
| H | -1.78790300 | -1.40488500 | 2.57625900  |
| C | 1.33232900  | -0.08159700 | 2.68063000  |
| H | -0.67360400 | 0.84959100  | 2.77969300  |
| N | 1.99233300  | 1.10666700  | 2.75855400  |
| H | 2.97344800  | 1.07417500  | 2.51742000  |
| H | 1.49829900  | 1.95511400  | 2.52235000  |

#### Graphene-U

|   |             |            |             |
|---|-------------|------------|-------------|
| C | -4.87344000 | 1.43802300 | -0.39902600 |
| C | -5.57636600 | 2.66547500 | -0.38807800 |
| C | -3.41981600 | 1.41954700 | -0.40348700 |
| C | -7.71219700 | 1.46451500 | -0.37800200 |
| C | -7.01343500 | 2.67303200 | -0.38413200 |
| C | -4.86636200 | 3.92058300 | -0.38102900 |
| C | -2.70946400 | 2.65802300 | -0.37549400 |
| C | -7.70881500 | 3.93644100 | -0.38264300 |
| C | -5.58214200 | 5.10123000 | -0.37851700 |

|   |             |             |             |
|---|-------------|-------------|-------------|
| C | -3.39493800 | 3.89263000  | -0.36551800 |
| C | -1.27773800 | 2.63892200  | -0.34529300 |
| C | -7.01015000 | 5.10930100  | -0.38162800 |
| H | -5.06439700 | 6.06649200  | -0.37200700 |
| C | -2.66554500 | 5.08293000  | -0.34534100 |
| C | -0.57099900 | 1.38664000  | -0.39093100 |
| C | -0.56447300 | 3.85427800  | -0.28210000 |
| H | -7.52319500 | 6.07262100  | -0.38058200 |
| C | -1.28501800 | 5.05718900  | -0.30517100 |
| H | -3.17570400 | 6.04169000  | -0.35595900 |
| C | 0.85217800  | 1.37273900  | -0.35731300 |
| C | 0.89574300  | 3.84007900  | -0.19105200 |
| H | -0.75663700 | 6.00368800  | -0.29675100 |
| C | 1.58453700  | 2.60760500  | -0.24067600 |
| C | 1.63416500  | 5.01989300  | -0.03945200 |
| C | 3.01610900  | 2.58494700  | -0.16536200 |
| C | 3.01530100  | 5.00186200  | 0.03558000  |
| H | 1.13351200  | 5.97592200  | 0.03576900  |
| C | 3.70168700  | 1.33606000  | -0.22093500 |
| C | 3.72539100  | 3.80284000  | -0.03008900 |
| H | 3.55198200  | 5.94141000  | 0.15230200  |
| C | 5.15367700  | 1.32446600  | -0.14871400 |
| C | 5.19691700  | 3.80137700  | 0.05144800  |
| C | 5.87569000  | 2.53401800  | -0.01386400 |
| C | 5.92182200  | 4.96818300  | 0.18660800  |
| C | 7.31051500  | 2.50118100  | 0.05749800  |
| H | 5.43055100  | 5.93592700  | 0.23747900  |
| C | 7.34555000  | 4.93247100  | 0.26128500  |
| C | 8.02255600  | 3.74852700  | 0.19963400  |
| C | 7.98764000  | 1.28480900  | -0.01039500 |
| H | 7.87809200  | 5.87679100  | 0.36817800  |
| C | 7.95669600  | -3.63512200 | -0.44679600 |
| C | 7.96567200  | -1.17224600 | -0.22555600 |
| C | 7.25811400  | -4.80079300 | -0.57733800 |
| C | 7.26666200  | -2.37047300 | -0.36005500 |
| C | 7.28958400  | 0.06516200  | -0.14881300 |
| C | 5.83283900  | -4.80055900 | -0.62640400 |
| H | 7.77420200  | -5.75772300 | -0.64622500 |
| C | 5.83059800  | -2.36682000 | -0.41486600 |
| C | 5.84700800  | 0.08369500  | -0.21316300 |
| C | 5.12838800  | -3.61631400 | -0.54591800 |
| H | 5.32391900  | -5.75488200 | -0.72943200 |
| C | 5.13078800  | -1.13900400 | -0.34337900 |
| C | 3.65551600  | -3.58136700 | -0.58206300 |
| C | 3.67842500  | -1.11350200 | -0.39724200 |
| C | 2.92200900  | -4.76334000 | -0.69044300 |
| C | 2.96851200  | -2.34529900 | -0.50871000 |
| C | 3.00074500  | 0.12052200  | -0.34278400 |
| C | 1.53868400  | -4.74812900 | -0.69617300 |
| H | 3.44237800  | -5.71601900 | -0.76900900 |

|   |             |             |             |
|---|-------------|-------------|-------------|
| C | 1.53542700  | -2.33194300 | -0.53417200 |
| C | 1.54579800  | 0.13814700  | -0.40361000 |
| C | 0.82207200  | -3.54922700 | -0.59408700 |
| H | 1.01858000  | -5.69187400 | -0.79249500 |
| C | 0.82804900  | -1.07873800 | -0.49490500 |
| C | -0.63900500 | -3.53175700 | -0.53391500 |
| C | -0.59581400 | -1.06139700 | -0.50354500 |
| C | -1.38289000 | -4.71830400 | -0.45795600 |
| C | -1.32763400 | -2.30120900 | -0.51956200 |
| C | -1.28502600 | 0.17060200  | -0.46064200 |
| C | -2.76266300 | -4.71605600 | -0.41640300 |
| H | -0.87228500 | -5.67352800 | -0.41392000 |
| C | -2.75969700 | -2.29119100 | -0.46981100 |
| C | -2.74043100 | 0.18488900  | -0.44104400 |
| C | -3.46805100 | -3.51263700 | -0.42815800 |
| H | -3.28995900 | -5.66300100 | -0.35285600 |
| C | -3.44499700 | -1.03786000 | -0.44525500 |
| C | -4.93916100 | -3.51010600 | -0.38736000 |
| C | -4.89781500 | -1.02822900 | -0.41010400 |
| C | -5.67722400 | -4.67651800 | -0.34611100 |
| C | -5.62421800 | -2.24180800 | -0.38803000 |
| C | -5.59111800 | 0.21207200  | -0.39801100 |
| C | -7.10497800 | -4.65669300 | -0.31731500 |
| H | -5.17722000 | -5.65149500 | -0.33261300 |
| C | -7.06142700 | -2.22097400 | -0.36021700 |
| C | -7.02940900 | 0.22610300  | -0.38048200 |
| C | -7.78086200 | -3.47077400 | -0.32668000 |
| H | -7.63598300 | -5.60987600 | -0.28644400 |
| C | -7.73613500 | -0.99967700 | -0.36180600 |
| H | 9.10763000  | 3.71315000  | 0.25447200  |
| H | 9.07207400  | 1.26490500  | 0.04092700  |
| H | 9.05055500  | -1.18002300 | -0.18113800 |
| H | 9.04295400  | -3.62727500 | -0.40709200 |
| H | -8.87126100 | -3.44147700 | -0.30631400 |
| H | -8.82993300 | -0.98324200 | -0.34549000 |
| H | -8.80611700 | 1.46990500  | -0.36975600 |
| H | -8.79976900 | 3.92846100  | -0.38174900 |
| C | 0.69936100  | -1.31403900 | 2.59023700  |
| C | -1.29612100 | 0.07362600  | 2.59945400  |
| C | -1.45362300 | -2.43070500 | 2.62013400  |
| C | 0.00394000  | -2.46635700 | 2.61813900  |
| N | -1.97987100 | -1.12679000 | 2.63527000  |
| N | 0.07960500  | -0.08759400 | 2.60112200  |
| O | -2.19968000 | -3.38916500 | 2.59456300  |
| H | -2.98988700 | -1.05153000 | 2.60400000  |
| O | -1.83973700 | 1.15703800  | 2.55970200  |
| H | 0.61237400  | 0.76815000  | 2.50822100  |
| H | 1.78441400  | -1.28281800 | 2.53743300  |
| H | 0.49531500  | -3.42946700 | 2.59082600  |



## Graphene-S6C

|   |             |             |             |
|---|-------------|-------------|-------------|
| C | -4.94251400 | 1.40936900  | -0.39080000 |
| C | -5.64852200 | 2.63156900  | -0.38330000 |
| C | -3.48643800 | 1.39518100  | -0.37563600 |
| C | -7.78033300 | 1.42388400  | -0.41500300 |
| C | -7.08573600 | 2.63291200  | -0.40129400 |
| C | -4.94442900 | 3.89246200  | -0.35694600 |
| C | -2.78132100 | 2.63182300  | -0.33000800 |
| C | -7.78504500 | 3.89565800  | -0.40309200 |
| C | -5.66236900 | 5.06973700  | -0.35951600 |
| C | -3.47299900 | 3.86885400  | -0.32268100 |
| C | -1.34823700 | 2.61901800  | -0.28822800 |
| C | -7.09149900 | 5.07014700  | -0.38439100 |
| H | -5.15196200 | 6.03639800  | -0.34147400 |
| C | -2.74790500 | 5.05751400  | -0.28748800 |
| C | -0.63737400 | 1.37411600  | -0.32461800 |
| C | -0.63844800 | 3.84252400  | -0.22278900 |
| H | -7.60762500 | 6.03104500  | -0.38663200 |
| C | -1.36352300 | 5.03857400  | -0.24140200 |
| H | -3.26226900 | 6.01477400  | -0.29609800 |
| C | 0.79016000  | 1.36534700  | -0.29845300 |
| C | 0.82215800  | 3.83178100  | -0.14370900 |
| H | -0.84176400 | 5.98884200  | -0.22565400 |
| C | 1.51565100  | 2.59968400  | -0.20199900 |
| C | 1.55696100  | 5.01281000  | -0.00468600 |
| C | 2.94846700  | 2.58573000  | -0.15316000 |
| C | 2.94109700  | 5.00363700  | 0.04648600  |
| H | 1.05333900  | 5.96690900  | 0.07575300  |
| C | 3.63870400  | 1.34416300  | -0.22626000 |
| C | 3.65455800  | 3.81011800  | -0.03328300 |
| H | 3.47211200  | 5.94711000  | 0.15264800  |
| C | 5.09361300  | 1.34050200  | -0.19358600 |
| C | 5.12654400  | 3.81603800  | 0.01302600  |
| C | 5.81255600  | 2.55081500  | -0.07595000 |
| C | 5.85092600  | 4.98350100  | 0.13409400  |
| C | 7.24897700  | 2.52857500  | -0.04402900 |
| H | 5.35524600  | 5.94981700  | 0.20388100  |
| C | 7.27802100  | 4.95832000  | 0.17063900  |
| C | 7.95910100  | 3.77915800  | 0.08422700  |
| C | 7.93091000  | 1.31680100  | -0.13669100 |
| H | 7.80635500  | 5.90618900  | 0.26846100  |
| C | 7.91817900  | -3.60097300 | -0.58768900 |
| C | 7.91717700  | -1.13915800 | -0.36039900 |
| C | 7.22401500  | -4.76998800 | -0.70267600 |
| C | 7.22167200  | -2.34083800 | -0.47968800 |
| C | 7.23296500  | 0.09371400  | -0.25978800 |
| C | 5.79625900  | -4.77502200 | -0.71642600 |
| H | 7.74208700  | -5.72490200 | -0.78568900 |
| C | 5.78481600  | -2.34288500 | -0.49698000 |
| C | 5.79282200  | 0.10384800  | -0.28380400 |

|   |             |             |             |
|---|-------------|-------------|-------------|
| C | 5.08452900  | -3.59791200 | -0.61588500 |
| H | 5.28986200  | -5.73392700 | -0.80779200 |
| C | 5.07965400  | -1.12274100 | -0.39877300 |
| C | 3.61199100  | -3.57150600 | -0.62047200 |
| C | 3.62457400  | -1.10592700 | -0.41249600 |
| C | 2.88427700  | -4.75300700 | -0.73958400 |
| C | 2.92020400  | -2.33745500 | -0.51325100 |
| C | 2.94069700  | 0.12408400  | -0.33004800 |
| C | 1.49883400  | -4.74297400 | -0.72549400 |
| H | 3.40480300  | -5.70226900 | -0.84584700 |
| C | 1.48694200  | -2.33104900 | -0.50792700 |
| C | 1.48816500  | 0.13456700  | -0.35594900 |
| C | 0.77859200  | -3.55379900 | -0.58428400 |
| H | 0.98204800  | -5.68681500 | -0.83845800 |
| C | 0.77569200  | -1.08657400 | -0.43361400 |
| C | -0.68227500 | -3.54636900 | -0.51199300 |
| C | -0.65198000 | -1.07656400 | -0.44481400 |
| C | -1.41944500 | -4.73335600 | -0.45025600 |
| C | -1.37795900 | -2.31337800 | -0.47769900 |
| C | -1.34802800 | 0.15338400  | -0.39271900 |
| C | -2.80487900 | -4.73549800 | -0.41649700 |
| H | -0.90606300 | -5.68792100 | -0.41655400 |
| C | -2.81115800 | -2.30889900 | -0.44908100 |
| C | -2.80018500 | 0.16224700  | -0.40370000 |
| C | -3.51668200 | -3.53830900 | -0.43104900 |
| H | -3.33004100 | -5.68601400 | -0.37588800 |
| C | -3.50144600 | -1.06331000 | -0.42805100 |
| C | -4.98856700 | -3.54398000 | -0.41885300 |
| C | -4.95741900 | -1.06058600 | -0.41815000 |
| C | -5.72048000 | -4.71261200 | -0.41410900 |
| C | -5.67768400 | -2.27454500 | -0.41846100 |
| C | -5.65578600 | 0.17867900  | -0.40897000 |
| C | -7.14970800 | -4.69581200 | -0.41048400 |
| H | -5.22146100 | -5.68536400 | -0.41397000 |
| C | -7.11490600 | -2.25870200 | -0.41683800 |
| C | -7.09265000 | 0.18713500  | -0.41489600 |
| C | -7.82925900 | -3.51301700 | -0.41304700 |
| H | -7.67729600 | -5.65046700 | -0.40656100 |
| C | -7.79500200 | -1.04137500 | -0.41882700 |
| H | 9.04625400  | 3.74973500  | 0.10961400  |
| H | 9.01789100  | 1.30226400  | -0.11509100 |
| H | 9.00435700  | -1.14009100 | -0.34439100 |
| H | 9.00587200  | -3.58684300 | -0.57489100 |
| H | -8.91903500 | -3.48639500 | -0.41170400 |
| H | -8.88682900 | -1.02836200 | -0.42189700 |
| H | -8.87219200 | 1.42390500  | -0.42522300 |
| H | -8.87493700 | 3.88208400  | -0.41984500 |
| C | 0.15489600  | -0.11314800 | 3.28582400  |
| C | -1.31533500 | -0.08898100 | 3.71020400  |
| C | -2.09436000 | -1.22937300 | 3.05029900  |

|   |             |             |            |
|---|-------------|-------------|------------|
| C | -1.45838000 | -2.59035300 | 3.34535400 |
| C | 0.01982100  | -2.61016800 | 2.94811300 |
| C | 0.79911300  | -1.46551900 | 3.59909000 |
| H | -3.14121100 | -1.21883600 | 3.37641000 |
| H | -1.37594100 | -0.19195500 | 4.80369900 |
| H | -1.76849200 | 0.87598500  | 3.45462100 |
| H | 0.21788100  | 0.06925700  | 2.20382400 |
| H | 0.70937700  | 0.69686800  | 3.77382800 |
| H | -1.54710000 | -2.80512000 | 4.42051100 |
| H | -1.99985200 | -3.38267800 | 2.81387700 |
| H | 0.47318600  | -3.57594000 | 3.20153900 |
| H | 0.09592400  | -2.50430300 | 1.85964400 |
| H | 0.82229100  | -1.61114600 | 4.68897100 |
| H | 1.84023300  | -1.47710200 | 3.25299900 |
| H | -2.09918500 | -1.06864300 | 1.96554200 |

#### Graphene-S6N

|   |             |            |             |
|---|-------------|------------|-------------|
| C | -4.90641300 | 1.39983400 | -0.37490000 |
| C | -5.60963700 | 2.62580500 | -0.33075700 |
| C | -3.45217700 | 1.37947000 | -0.35061000 |
| C | -7.74455700 | 1.42167200 | -0.42656500 |
| C | -7.04612900 | 2.62608100 | -0.35942100 |
| C | -4.90754200 | 3.88153200 | -0.25676200 |
| C | -2.74505300 | 2.61378500 | -0.27809300 |
| C | -7.73927700 | 3.89139400 | -0.31493600 |
| C | -5.61576600 | 5.06519400 | -0.21470600 |
| C | -3.43516800 | 3.85078000 | -0.22850300 |
| C | -1.31164400 | 2.60416100 | -0.25351500 |
| C | -7.04232200 | 5.06289500 | -0.24493700 |
| H | -5.10692400 | 6.02492200 | -0.15874500 |
| C | -2.70619100 | 5.03630100 | -0.15165900 |
| C | -0.60309700 | 1.35352900 | -0.30124800 |
| C | -0.60213600 | 3.82459800 | -0.18168100 |
| H | -7.55881200 | 6.02155400 | -0.21088300 |
| C | -1.32266100 | 5.02274700 | -0.12774700 |
| H | -3.22739500 | 5.99053800 | -0.10900100 |
| C | 0.82493500  | 1.34135300 | -0.27589100 |
| C | 0.86089400  | 3.81028300 | -0.16552500 |
| H | -0.80824000 | 5.97199700 | -0.06437600 |
| C | 1.55317300  | 2.57572700 | -0.20967400 |
| C | 1.60566600  | 4.99329200 | -0.11002700 |
| C | 2.98683600  | 2.56634900 | -0.18954100 |
| C | 2.99050100  | 4.99055200 | -0.09020400 |
| H | 1.09962100  | 5.95197100 | -0.08190200 |
| C | 3.67438800  | 1.31914400 | -0.23505800 |
| C | 3.69697700  | 3.79101500 | -0.12760100 |
| H | 3.51916100  | 5.93900300 | -0.04521300 |
| C | 5.13061700  | 1.31188900 | -0.21880700 |
| C | 5.16879600  | 3.79210100 | -0.10514500 |
| C | 5.85456800  | 2.52225300 | -0.15492400 |

|   |             |             |             |
|---|-------------|-------------|-------------|
| C | 5.90372100  | 4.95715500  | -0.03919700 |
| C | 7.29167100  | 2.50263900  | -0.13863100 |
| H | 5.40651400  | 5.93040400  | 0.00041400  |
| C | 7.33266600  | 4.93657200  | -0.02077300 |
| C | 8.00927100  | 3.75301100  | -0.06928200 |
| C | 7.96876400  | 1.28465300  | -0.18999700 |
| H | 7.86246300  | 5.88860700  | 0.03236600  |
| C | 7.94836300  | -3.64541200 | -0.43342000 |
| C | 7.94844100  | -1.17686400 | -0.31110500 |
| C | 7.25236900  | -4.81708200 | -0.49538800 |
| C | 7.25134100  | -2.38291400 | -0.37530900 |
| C | 7.26316800  | 0.05993800  | -0.25643100 |
| C | 5.82321100  | -4.81297400 | -0.50263600 |
| H | 7.76657300  | -5.77803600 | -0.54047200 |
| C | 5.81404100  | -2.37773700 | -0.38453700 |
| C | 5.82620600  | 0.07237000  | -0.26898600 |
| C | 5.10735400  | -3.63541400 | -0.44884600 |
| H | 5.31002600  | -5.77742100 | -0.55257800 |
| C | 5.11023300  | -1.15498800 | -0.33193900 |
| C | 3.63562000  | -3.60899600 | -0.45383900 |
| C | 3.65416000  | -1.13710500 | -0.34209000 |
| C | 2.90875000  | -4.79554900 | -0.51943600 |
| C | 2.94620000  | -2.37238800 | -0.39921900 |
| C | 2.97007400  | 0.09726500  | -0.29537500 |
| C | 1.52408600  | -4.77403500 | -0.51938800 |
| H | 3.42148800  | -5.75210400 | -0.57557400 |
| C | 1.51247100  | -2.35649600 | -0.40349500 |
| C | 1.51785100  | 0.11019100  | -0.31455300 |
| C | 0.79969500  | -3.57907400 | -0.44785200 |
| H | 1.00061300  | -5.72141100 | -0.58710500 |
| C | 0.80326400  | -1.10933500 | -0.36990600 |
| C | -0.66297400 | -3.56804600 | -0.43031900 |
| C | -0.62264600 | -1.09825400 | -0.39379800 |
| C | -1.40260700 | -4.75782200 | -0.40396600 |
| C | -1.35127700 | -2.33559800 | -0.43749200 |
| C | -1.31691200 | 0.13529500  | -0.37080800 |
| C | -2.78503100 | -4.74754300 | -0.43030400 |
| H | -0.90210800 | -5.71557500 | -0.35715100 |
| C | -2.78433500 | -2.32061800 | -0.46029800 |
| C | -2.77082800 | 0.14722300  | -0.39662300 |
| C | -3.49389900 | -3.54602600 | -0.47319100 |
| H | -3.32331200 | -5.69313500 | -0.41695700 |
| C | -3.47161600 | -1.07358400 | -0.45369300 |
| C | -4.96609900 | -3.55214600 | -0.51908100 |
| C | -4.92596900 | -1.06876100 | -0.47150900 |
| C | -5.69253900 | -4.72455400 | -0.56842600 |
| C | -5.64859200 | -2.28352200 | -0.51182400 |
| C | -5.62266100 | 0.17181600  | -0.43860700 |
| C | -7.11843000 | -4.69748000 | -0.60944000 |
| H | -5.19867500 | -5.69350200 | -0.57934900 |

|   |             |             |             |
|---|-------------|-------------|-------------|
| C | -7.08480600 | -2.25915700 | -0.54443700 |
| C | -7.06408500 | 0.18392500  | -0.46447400 |
| C | -7.79727200 | -3.51327900 | -0.59699000 |
| H | -7.64964600 | -5.64778400 | -0.65075300 |
| C | -7.76402400 | -1.04214000 | -0.52250300 |
| H | 9.09899700  | 3.72317300  | -0.05685600 |
| H | 9.06078200  | 1.26850900  | -0.17922300 |
| H | 9.04060900  | -1.17960700 | -0.30290400 |
| H | 9.03851100  | -3.63438200 | -0.42674200 |
| H | -8.88391900 | -3.48310100 | -0.62687900 |
| H | -8.85027300 | -1.02645800 | -0.54881300 |
| H | -8.83105300 | 1.42495700  | -0.44951300 |
| H | -8.82650500 | 3.87981200  | -0.33902100 |
| C | -0.20836800 | 0.09445100  | 3.24129600  |
| C | -1.73059500 | 0.06617600  | 3.12321000  |
| C | -1.74887900 | -2.36289900 | 3.07481300  |
| C | -0.22714300 | -2.41887500 | 3.18982300  |
| C | 0.29465300  | -1.18046200 | 3.92313000  |
| H | -2.16998300 | 0.11812100  | 4.13942600  |
| H | -2.08822800 | 0.94002900  | 2.56373300  |
| H | 0.21815900  | 0.16209100  | 2.23333100  |
| H | 0.10608400  | 0.98457900  | 3.79708200  |
| H | -2.18773900 | -2.44769500 | 4.08912500  |
| H | -2.11938500 | -3.20853800 | 2.48188000  |
| H | 0.07482600  | -3.33546300 | 3.70852800  |
| H | 0.19701500  | -2.45150500 | 2.17881500  |
| H | -0.07013200 | -1.19945500 | 4.96079400  |
| H | 1.38868300  | -1.18952100 | 3.96822500  |
| N | -2.13600600 | -1.13155500 | 2.40193400  |
| H | -3.13754500 | -1.12043200 | 2.22623000  |

#### Graphene-S6O

|   |             |            |             |
|---|-------------|------------|-------------|
| C | -4.90269300 | 1.40375400 | -0.37362500 |
| C | -5.60648800 | 2.62802300 | -0.34653700 |
| C | -3.44724400 | 1.38414800 | -0.35067700 |
| C | -7.74084600 | 1.42709700 | -0.42132500 |
| C | -7.04349800 | 2.63441200 | -0.37336900 |
| C | -4.89945000 | 3.88548800 | -0.29080100 |
| C | -2.73914600 | 2.62264000 | -0.28919500 |
| C | -7.74048100 | 3.89765600 | -0.34841300 |
| C | -5.61565900 | 5.06409100 | -0.26816700 |
| C | -3.42794100 | 3.85851800 | -0.25927900 |
| C | -1.30571900 | 2.60656200 | -0.25847900 |
| C | -7.04437000 | 5.07000700 | -0.29771200 |
| H | -5.10142000 | 6.02925800 | -0.22674100 |
| C | -2.70157100 | 5.04689000 | -0.20194400 |
| C | -0.59782300 | 1.35695400 | -0.29901600 |
| C | -0.59364100 | 3.82690700 | -0.19188300 |
| H | -7.55823800 | 6.03224200 | -0.27849000 |
| C | -1.31840600 | 5.02475500 | -0.17029800 |

|   |             |             |             |
|---|-------------|-------------|-------------|
| H | -3.21437000 | 6.00463700  | -0.18227700 |
| C | 0.82849600  | 1.34623800  | -0.27407200 |
| C | 0.86916400  | 3.81575300  | -0.15084100 |
| H | -0.79554600 | 5.97365500  | -0.12959600 |
| C | 1.55863800  | 2.58295700  | -0.19823300 |
| C | 1.60894400  | 5.00039900  | -0.06348300 |
| C | 2.99195000  | 2.56554600  | -0.16739200 |
| C | 2.99231800  | 4.98766400  | -0.03267600 |
| H | 1.10995400  | 5.95891400  | -0.01493300 |
| C | 3.67919500  | 1.31914700  | -0.21992200 |
| C | 3.70205200  | 3.78894600  | -0.08532000 |
| H | 3.52960400  | 5.93168500  | 0.03473700  |
| C | 5.13334200  | 1.31287500  | -0.19655600 |
| C | 5.17511400  | 3.79310600  | -0.05394000 |
| C | 5.85614600  | 2.52613600  | -0.11478900 |
| C | 5.90116700  | 4.96396200  | 0.02974600  |
| C | 7.29257800  | 2.49949600  | -0.09217300 |
| H | 5.40817900  | 5.93156400  | 0.07725400  |
| C | 7.32708200  | 4.93467500  | 0.05504100  |
| C | 8.00540900  | 3.75150000  | -0.00390300 |
| C | 7.97126100  | 1.28373500  | -0.15489200 |
| H | 7.85934100  | 5.88278300  | 0.12208700  |
| C | 7.94218300  | -3.64548000 | -0.45973100 |
| C | 7.95017600  | -1.17764500 | -0.30678200 |
| C | 7.24358700  | -4.81575200 | -0.53696200 |
| C | 7.25079400  | -2.38052500 | -0.38752700 |
| C | 7.27165100  | 0.05947900  | -0.23942900 |
| C | 5.81721300  | -4.81877200 | -0.54627200 |
| H | 7.75975500  | -5.77343100 | -0.59290600 |
| C | 5.81391300  | -2.38058900 | -0.40011900 |
| C | 5.82891700  | 0.07302500  | -0.25726100 |
| C | 5.11109000  | -3.63469400 | -0.47934300 |
| H | 5.30778400  | -5.77691500 | -0.60785300 |
| C | 5.11222500  | -1.15393000 | -0.33600000 |
| C | 3.63800000  | -3.60329300 | -0.48298600 |
| C | 3.65841100  | -1.13296300 | -0.34826000 |
| C | 2.90670000  | -4.78786700 | -0.56171700 |
| C | 2.94985000  | -2.36652000 | -0.41544100 |
| C | 2.97840800  | 0.09964200  | -0.29341700 |
| C | 1.52286000  | -4.77487300 | -0.55517600 |
| H | 3.42757700  | -5.74083200 | -0.63256800 |
| C | 1.51625000  | -2.35687300 | -0.41499300 |
| C | 1.52346200  | 0.11378100  | -0.31538000 |
| C | 0.80499800  | -3.57713500 | -0.46349500 |
| H | 1.00482200  | -5.72103800 | -0.63764600 |
| C | 0.80615500  | -1.10619200 | -0.37352800 |
| C | -0.65780000 | -3.56112000 | -0.42419300 |
| C | -0.61836200 | -1.09167700 | -0.39732100 |
| C | -1.40158400 | -4.74764700 | -0.37207000 |
| C | -1.34856500 | -2.32816800 | -0.42685400 |

|   |             |             |             |
|---|-------------|-------------|-------------|
| C | -1.31072000 | 0.13852400  | -0.36340100 |
| C | -2.78504200 | -4.74605900 | -0.38244700 |
| H | -0.89236300 | -5.70341600 | -0.31570300 |
| C | -2.78159100 | -2.31976500 | -0.43892600 |
| C | -2.76453800 | 0.15174800  | -0.38787500 |
| C | -3.49072600 | -3.54330300 | -0.43286800 |
| H | -3.31473900 | -5.69415500 | -0.34932700 |
| C | -3.46768300 | -1.07084700 | -0.42432300 |
| C | -4.96226300 | -3.54521800 | -0.46562000 |
| C | -4.92351300 | -1.06322900 | -0.43949300 |
| C | -5.69787400 | -4.71148500 | -0.49974700 |
| C | -5.64824000 | -2.27490300 | -0.46570800 |
| C | -5.61895900 | 0.17668700  | -0.41972400 |
| C | -7.12661700 | -4.69225900 | -0.53141800 |
| H | -5.19976100 | -5.68593800 | -0.50384100 |
| C | -7.08548200 | -2.25594800 | -0.49204900 |
| C | -7.05611400 | 0.18945500  | -0.44234300 |
| C | -7.80321600 | -3.50758400 | -0.52711000 |
| H | -7.65620500 | -5.64571400 | -0.55879700 |
| C | -7.76203300 | -1.03660600 | -0.48188500 |
| H | 9.09202400  | 3.72019800  | 0.01372400  |
| H | 9.05718500  | 1.26749400  | -0.13964400 |
| H | 9.03623300  | -1.18157400 | -0.29575700 |
| H | 9.02926800  | -3.63430400 | -0.45138100 |
| H | -8.89314900 | -3.47843300 | -0.54975600 |
| H | -8.85466000 | -1.02043600 | -0.50240500 |
| H | -8.83360000 | 1.43093100  | -0.44150700 |
| H | -8.83075100 | 3.88760700  | -0.37085800 |
| C | -0.25611600 | 0.05695000  | 3.17662300  |
| C | -1.77144200 | -0.00411200 | 3.02296200  |
| C | -1.77490100 | -2.36220500 | 2.94040800  |
| C | -0.25961700 | -2.43834200 | 3.09361500  |
| C | 0.25097800  | -1.21529900 | 3.85786400  |
| H | -2.24771700 | 0.01090000  | 4.01978300  |
| H | -2.15043400 | 0.84821400  | 2.44881800  |
| H | 0.20052700  | 0.14476300  | 2.18318400  |
| H | 0.02236900  | 0.95126600  | 3.74587500  |
| H | -2.25266400 | -2.44592000 | 3.93304300  |
| H | -2.15346000 | -3.17164200 | 2.30690700  |
| H | 0.01315200  | -3.36889500 | 3.60489400  |
| H | 0.20214800  | -2.46323500 | 2.09865700  |
| H | -0.12183300 | -1.24917600 | 4.89192700  |
| H | 1.34518800  | -1.21863900 | 3.90991200  |
| O | -2.18630500 | -1.15939200 | 2.32028100  |

#### Graphene-S6S

|   |             |            |             |
|---|-------------|------------|-------------|
| C | -4.90041000 | 1.43589400 | -0.44362200 |
| C | -5.60375700 | 2.66123800 | -0.42842000 |
| C | -3.44556600 | 1.41684600 | -0.42504300 |
| C | -7.73864000 | 1.45927700 | -0.46858700 |

|   |             |             |             |
|---|-------------|-------------|-------------|
| C | -7.04081400 | 2.66749800  | -0.44687000 |
| C | -4.89570200 | 3.91855100  | -0.39419500 |
| C | -2.73679900 | 2.65542400  | -0.37331800 |
| C | -7.73726500 | 3.93097300  | -0.44034100 |
| C | -5.61183300 | 5.09780700  | -0.38943000 |
| C | -3.42425700 | 3.89164100  | -0.36032400 |
| C | -1.30395200 | 2.63839700  | -0.33213800 |
| C | -7.04035700 | 5.10394100  | -0.41415800 |
| H | -5.09668700 | 6.06336100  | -0.36545800 |
| C | -2.69648800 | 5.08062200  | -0.31986300 |
| C | -0.59606700 | 1.38828200  | -0.37306400 |
| C | -0.59143900 | 3.85728500  | -0.26225200 |
| H | -7.55403400 | 6.06657700  | -0.41013600 |
| C | -1.31407000 | 5.05721000  | -0.27451600 |
| H | -3.20806500 | 6.03908500  | -0.32400700 |
| C | 0.82936400  | 1.37672100  | -0.34440700 |
| C | 0.86974400  | 3.84367900  | -0.18330100 |
| H | -0.78846000 | 6.00536100  | -0.25367900 |
| C | 1.55934900  | 2.61176100  | -0.24063600 |
| C | 1.60753200  | 5.02466000  | -0.04365400 |
| C | 2.99179600  | 2.59236900  | -0.18480400 |
| C | 2.99002400  | 5.00990100  | 0.01304600  |
| H | 1.10686100  | 5.98052400  | 0.03256400  |
| C | 3.67917400  | 1.34644000  | -0.25380200 |
| C | 3.70074900  | 3.81255900  | -0.06122400 |
| H | 3.52595200  | 5.95100700  | 0.11988600  |
| C | 5.13257400  | 1.33837100  | -0.20946200 |
| C | 5.17318800  | 3.81444900  | -0.00467400 |
| C | 5.85439600  | 2.54891700  | -0.08599100 |
| C | 5.89818200  | 4.98237200  | 0.12015900  |
| C | 7.29029000  | 2.52009800  | -0.04163900 |
| H | 5.40509900  | 5.94883200  | 0.18336500  |
| C | 7.32331900  | 4.95076300  | 0.16818100  |
| C | 8.00202200  | 3.76880500  | 0.09028000  |
| C | 7.96926600  | 1.30571300  | -0.12580800 |
| H | 7.85509700  | 5.89626300  | 0.26791300  |
| C | 7.94247900  | -3.61288800 | -0.57417700 |
| C | 7.94938900  | -1.15068000 | -0.34694600 |
| C | 7.24460900  | -4.77966700 | -0.69770200 |
| C | 7.25079300  | -2.35003300 | -0.47364400 |
| C | 7.27092000  | 0.08476700  | -0.25439700 |
| C | 5.81861600  | -4.78153500 | -0.72782200 |
| H | 7.76134000  | -5.73550700 | -0.77553500 |
| C | 5.81419100  | -2.34891400 | -0.50650500 |
| C | 5.82826300  | 0.09990800  | -0.29256000 |
| C | 5.11231400  | -3.59931400 | -0.63431000 |
| H | 5.30990000  | -5.73676400 | -0.82641100 |
| C | 5.11234400  | -1.12383600 | -0.41511100 |
| C | 3.63927800  | -3.56698500 | -0.65504800 |
| C | 3.65893200  | -1.10164700 | -0.44291600 |



|   |             |             |             |
|---|-------------|-------------|-------------|
| C | 2.90807000  | -4.74748500 | -0.78235300 |
| C | 2.95086500  | -2.33277800 | -0.55354900 |
| C | 2.97901500  | 0.12973500  | -0.36501200 |
| C | 1.52409900  | -4.73448000 | -0.78076400 |
| H | 3.42906100  | -5.69747900 | -0.88452700 |
| C | 1.51757700  | -2.32275100 | -0.56125400 |
| C | 1.52428900  | 0.14496700  | -0.40118300 |
| C | 0.80642100  | -3.54086400 | -0.64567800 |
| H | 1.00574700  | -5.67669400 | -0.89886100 |
| C | 0.80770000  | -1.07311700 | -0.48723700 |
| C | -0.65567600 | -3.52771300 | -0.58370400 |
| C | -0.61702000 | -1.05870700 | -0.50139900 |
| C | -1.39745600 | -4.71587100 | -0.53607600 |
| C | -1.34726200 | -2.29603600 | -0.54409500 |
| C | -1.30942100 | 0.17083900  | -0.44432200 |
| C | -2.78047100 | -4.71505600 | -0.50734000 |
| H | -0.88552300 | -5.67156800 | -0.51031900 |
| C | -2.78012900 | -2.28835400 | -0.52382600 |
| C | -2.76357000 | 0.18399800  | -0.46020400 |
| C | -3.48813100 | -3.51237800 | -0.51555500 |
| H | -3.30858300 | -5.66398500 | -0.47640000 |
| C | -3.46695100 | -1.03862600 | -0.49152000 |
| C | -4.96000500 | -3.51373000 | -0.50729100 |
| C | -4.92185600 | -1.03129800 | -0.48920300 |
| C | -5.69652400 | -4.68034900 | -0.51150700 |
| C | -5.64639700 | -2.24403400 | -0.49816200 |
| C | -5.61691300 | 0.20865800  | -0.47078900 |
| C | -7.12533500 | -4.66160700 | -0.50925200 |
| H | -5.19802400 | -5.65491400 | -0.51717100 |
| C | -7.08385400 | -2.22512100 | -0.49775800 |
| C | -7.05448400 | 0.22128500  | -0.47768100 |
| C | -7.80200900 | -3.47673100 | -0.50349800 |
| H | -7.65543300 | -5.61529500 | -0.51227500 |
| C | -7.76032100 | -1.00534300 | -0.49023800 |
| H | 9.08812400  | 3.73613900  | 0.12472000  |
| H | 9.05469500  | 1.28825900  | -0.09418200 |
| H | 9.03504800  | -1.15596400 | -0.31985900 |
| H | 9.02927600  | -3.60291100 | -0.54950600 |
| H | -8.89233200 | -3.44806700 | -0.50198600 |
| H | -8.85346500 | -0.98977000 | -0.49213000 |
| H | -8.83183400 | 1.46331000  | -0.47788900 |
| H | -8.82777800 | 3.92131500  | -0.45682900 |
| C | 0.16715900  | 0.00223400  | 3.14010000  |
| C | -1.27584600 | 0.07351500  | 3.63119700  |
| C | -1.33154300 | -2.65756600 | 3.31655400  |
| C | 0.12159000  | -2.53389000 | 2.86800900  |
| C | 0.84053800  | -1.32937100 | 3.47799400  |
| H | -1.31676000 | -0.03166700 | 4.72266000  |
| H | -1.73172900 | 1.03274400  | 3.36970900  |
| H | 0.18252700  | 0.15521900  | 2.05523200  |

|   |             |             |            |
|---|-------------|-------------|------------|
| H | 0.73692300  | 0.82602900  | 3.58909400 |
| H | -1.39026200 | -2.81127100 | 4.40142500 |
| H | -1.81701800 | -3.50856000 | 2.82918700 |
| H | 0.65563100  | -3.45533000 | 3.13408300 |
| H | 0.14823300  | -2.45289500 | 1.77778500 |
| H | 0.88553200  | -1.44557000 | 4.57094500 |
| H | 1.87707700  | -1.31109900 | 3.11900500 |
| S | -2.33419400 | -1.20040000 | 2.86995500 |

#### Graphene-S5C

|   |             |            |             |
|---|-------------|------------|-------------|
| C | -5.07910800 | 1.34744800 | -0.11871200 |
| C | -5.79789000 | 2.55485100 | 0.02359700  |
| C | -3.62400700 | 1.35179100 | -0.14490100 |
| C | -7.91604400 | 1.32272100 | -0.07490200 |
| C | -7.23443300 | 2.53164700 | 0.05151700  |
| C | -5.11172400 | 3.81805000 | 0.14198900  |
| C | -2.93400100 | 2.59191300 | -0.05210800 |
| C | -7.94478300 | 3.77858700 | 0.21116800  |
| C | -5.83656800 | 4.98155900 | 0.29268400  |
| C | -3.63979300 | 3.81433600 | 0.09020200  |
| C | -1.50152500 | 2.60707200 | -0.10760000 |
| C | -7.26387200 | 4.95504900 | 0.32881000  |
| H | -5.34128900 | 5.94613500 | 0.38640000  |
| C | -2.92577200 | 5.00620500 | 0.18607600  |
| C | -0.77592800 | 1.37411700 | -0.21180700 |
| C | -0.80802800 | 3.83923700 | -0.04546200 |
| H | -7.79229500 | 5.90002600 | 0.45131900  |
| C | -1.54157800 | 5.01699800 | 0.12198300  |
| H | -3.45575200 | 5.94753000 | 0.31371500  |
| C | 0.65162600  | 1.38365300 | -0.24289900 |
| C | 0.65097000  | 3.85193700 | -0.15093100 |
| H | -1.03641000 | 5.96912900 | 0.21697300  |
| C | 1.36139400  | 2.62874600 | -0.21865400 |
| C | 1.37350500  | 5.04846600 | -0.19686000 |
| C | 2.79368800  | 2.64231800 | -0.27802700 |
| C | 2.75763000  | 5.06824700 | -0.26343600 |
| H | 0.84956600  | 5.99779400 | -0.18989200 |
| C | 3.49919800  | 1.40604700 | -0.31571400 |
| C | 3.48405500  | 3.88030700 | -0.29310100 |
| H | 3.27041000  | 6.02595700 | -0.29300500 |
| C | 4.95522900  | 1.42022000 | -0.33840700 |
| C | 4.95515500  | 3.90377300 | -0.34504000 |
| C | 5.66003900  | 2.64266800 | -0.35563200 |
| C | 5.67232000  | 5.08087200 | -0.37676600 |
| C | 7.09714000  | 2.64378400 | -0.38319100 |
| H | 5.16193500  | 6.04755000 | -0.37230600 |
| C | 7.10135100  | 5.08101000 | -0.41460400 |
| C | 7.79547200  | 3.90680000 | -0.41549000 |
| C | 7.79217900  | 1.43495900 | -0.37637500 |
| H | 7.61681500  | 6.04187500 | -0.44069700 |

|   |             |             |             |
|---|-------------|-------------|-------------|
| C | 7.84176500  | -3.50198200 | -0.26741300 |
| C | 7.80752400  | -1.03071100 | -0.32724100 |
| C | 7.16214900  | -4.68433300 | -0.24056800 |
| C | 7.12761300  | -2.24778100 | -0.29904700 |
| C | 7.10535800  | 0.19792200  | -0.34790600 |
| C | 5.73272600  | -4.70176300 | -0.24794900 |
| H | 7.68970100  | -5.63862500 | -0.21461800 |
| C | 5.69033700  | -2.26423300 | -0.30128800 |
| C | 5.66868800  | 0.18930400  | -0.33771200 |
| C | 5.00081700  | -3.53378700 | -0.27936600 |
| H | 5.23418800  | -5.67440600 | -0.22938600 |
| C | 4.97084500  | -1.05038100 | -0.32325000 |
| C | 3.52888100  | -3.52858300 | -0.30135700 |
| C | 3.51485700  | -1.05347500 | -0.33265200 |
| C | 2.81509400  | -4.72452700 | -0.27738500 |
| C | 2.82456000  | -2.29844900 | -0.33898200 |
| C | 2.81369100  | 0.17266500  | -0.32433800 |
| C | 1.42936300  | -4.72198000 | -0.33256000 |
| H | 3.33849600  | -5.67488700 | -0.21574800 |
| C | 1.39168100  | -2.30261800 | -0.37959700 |
| C | 1.36245900  | 0.16323800  | -0.30933100 |
| C | 0.69558500  | -3.53530300 | -0.42331600 |
| H | 0.91265500  | -5.67476000 | -0.29244200 |
| C | 0.66676700  | -1.06668800 | -0.35651800 |
| C | -0.76217800 | -3.54088600 | -0.53947300 |
| C | -0.76112000 | -1.07672000 | -0.35878600 |
| C | -1.47856600 | -4.72603300 | -0.72347200 |
| C | -1.47163000 | -2.31878000 | -0.46107400 |
| C | -1.47359200 | 0.14373600  | -0.27738800 |
| C | -2.86415400 | -4.73490400 | -0.76658100 |
| H | -0.95747600 | -5.66628100 | -0.84836400 |
| C | -2.90410900 | -2.32427100 | -0.49220500 |
| C | -2.92578400 | 0.13334300  | -0.26503400 |
| C | -3.59402700 | -3.55607000 | -0.63553000 |
| H | -3.38229600 | -5.68137400 | -0.90398500 |
| C | -3.60904900 | -1.09468500 | -0.37756900 |
| C | -5.06660600 | -3.58063800 | -0.65412500 |
| C | -5.06424600 | -1.11092700 | -0.37894900 |
| C | -5.77787300 | -4.75378500 | -0.79414000 |
| C | -5.76811400 | -2.32810100 | -0.51288500 |
| C | -5.77780500 | 0.11314100  | -0.24105400 |
| C | -7.20591900 | -4.74789700 | -0.79733500 |
| H | -5.27105600 | -5.71060500 | -0.90414500 |
| C | -7.20510900 | -2.32548600 | -0.50983900 |
| C | -7.21778500 | 0.10283300  | -0.22656000 |
| C | -7.90084900 | -3.58199300 | -0.65875800 |
| H | -7.72332500 | -5.69992200 | -0.91200500 |
| C | -7.90128100 | -1.12698000 | -0.36487800 |
| H | 8.88516100  | 3.89339600  | -0.44074700 |
| H | 8.88387100  | 1.43519800  | -0.39226900 |

|   |             |             |             |
|---|-------------|-------------|-------------|
| H | 8.89923700  | -1.01768900 | -0.33170700 |
| H | 8.93148600  | -3.47530300 | -0.26474500 |
| H | -8.98867000 | -3.56756400 | -0.65743700 |
| H | -8.98865900 | -1.12794000 | -0.35787700 |
| H | -9.00320200 | 1.30786200  | -0.05790500 |
| H | -9.03200900 | 3.74850500  | 0.23479300  |
| C | 1.79280300  | -1.19630700 | 3.10277600  |
| C | 0.44235700  | -0.45845900 | 3.27086300  |
| C | -0.53052600 | -1.52675400 | 3.78672400  |
| C | -0.07401400 | -2.78566100 | 3.04600500  |
| C | 1.45791900  | -2.71121000 | 3.12778900  |
| H | 2.28560000  | -0.90793200 | 2.17015700  |
| H | 2.48175000  | -0.94135900 | 3.91421200  |
| H | 0.08866100  | -0.09347400 | 2.29918500  |
| H | 0.51289600  | 0.40976700  | 3.93246600  |
| H | -0.40364000 | -1.66525700 | 4.86852100  |
| H | -1.57960400 | -1.27311100 | 3.60242800  |
| H | -0.48301400 | -3.71230900 | 3.46061800  |
| H | -0.39939400 | -2.71993200 | 2.00145800  |
| H | 1.79261400  | -3.15135400 | 4.07449800  |
| H | 1.95062300  | -3.26719700 | 2.32360000  |

#### Graphene-S5N

|   |             |            |             |
|---|-------------|------------|-------------|
| C | -5.10690500 | 1.35961000 | -0.10206000 |
| C | -5.83450600 | 2.56299300 | 0.03568000  |
| C | -3.65215900 | 1.37303600 | -0.12437400 |
| C | -7.94463400 | 1.32157100 | -0.06355500 |
| C | -7.27127600 | 2.53743600 | 0.05938200  |
| C | -5.15177800 | 3.82909200 | 0.15452300  |
| C | -2.96826400 | 2.62130100 | -0.02598000 |
| C | -7.99255800 | 3.77779600 | 0.21081900  |
| C | -5.89097800 | 4.98525900 | 0.29790300  |
| C | -3.68047600 | 3.83634700 | 0.11342500  |
| C | -1.53566200 | 2.63842000 | -0.07243400 |
| C | -7.31915600 | 4.95895000 | 0.32751200  |
| H | -5.39539000 | 5.95655100 | 0.39233100  |
| C | -2.97635800 | 5.03502800 | 0.21574600  |
| C | -0.80288800 | 1.40768500 | -0.18286300 |
| C | -0.84751200 | 3.87140100 | 0.00158100  |
| H | -7.85183800 | 5.90403100 | 0.44444700  |
| C | -1.59356100 | 5.04530600 | 0.16304100  |
| H | -3.50555700 | 5.97568200 | 0.33929700  |
| C | 0.62282900  | 1.42775800 | -0.21174500 |
| C | 0.61307800  | 3.89619200 | -0.08352600 |
| H | -1.08758700 | 5.99953400 | 0.25945300  |
| C | 1.32766400  | 2.67974500 | -0.16553700 |
| C | 1.32618900  | 5.09977800 | -0.09106300 |
| C | 2.76012400  | 2.69560500 | -0.21608000 |
| C | 2.70914300  | 5.11958400 | -0.14387200 |
| H | 0.80497700  | 6.04714500 | -0.06325800 |

|   |             |             |             |
|---|-------------|-------------|-------------|
| C | 3.47260200  | 1.46405900  | -0.28093100 |
| C | 3.44437300  | 3.93618000  | -0.19742400 |
| H | 3.22585400  | 6.07718200  | -0.14382400 |
| C | 4.92669300  | 1.48900400  | -0.30571900 |
| C | 4.91676300  | 3.97292900  | -0.23890000 |
| C | 5.62401600  | 2.71898000  | -0.28626400 |
| C | 5.61912200  | 5.16061300  | -0.22823300 |
| C | 7.06062000  | 2.72357500  | -0.31335300 |
| H | 5.10694600  | 6.11898100  | -0.19389500 |
| C | 7.04560500  | 5.16272300  | -0.26109100 |
| C | 7.74781400  | 3.99297200  | -0.30094300 |
| C | 7.76396800  | 1.52075400  | -0.34930600 |
| H | 7.55819300  | 6.12398400  | -0.25233200 |
| C | 7.83522700  | -3.41768200 | -0.42385600 |
| C | 7.79310900  | -0.94545300 | -0.39028000 |
| C | 7.16059600  | -4.60413700 | -0.43386800 |
| C | 7.11845700  | -2.16475400 | -0.40104900 |
| C | 7.08951800  | 0.27958600  | -0.36233500 |
| C | 5.73414100  | -4.63653200 | -0.42316900 |
| H | 7.69572700  | -5.55292800 | -0.45114200 |
| C | 5.68175700  | -2.19469900 | -0.38935900 |
| C | 5.64728100  | 0.26248800  | -0.34524600 |
| C | 5.00420900  | -3.46570800 | -0.40153100 |
| H | 5.24456400  | -5.60705900 | -0.43460300 |
| C | 4.95591200  | -0.98141000 | -0.36553400 |
| C | 3.53103700  | -3.46428600 | -0.39500200 |
| C | 3.50194400  | -0.99043700 | -0.36131500 |
| C | 2.82296700  | -4.66590000 | -0.37640400 |
| C | 2.81875600  | -2.23889600 | -0.38959500 |
| C | 2.79710000  | 0.22963500  | -0.31640000 |
| C | 1.43862500  | -4.68002600 | -0.38842400 |
| H | 3.36264300  | -5.61029800 | -0.34913900 |
| C | 1.38503700  | -2.25779500 | -0.40073800 |
| C | 1.34242600  | 0.21179000  | -0.29423100 |
| C | 0.69819800  | -3.49282700 | -0.43694400 |
| H | 0.93715400  | -5.63802400 | -0.35419300 |
| C | 0.65090000  | -1.02206500 | -0.35578300 |
| C | -0.76338400 | -3.50310000 | -0.51762000 |
| C | -0.77486800 | -1.03736400 | -0.35092200 |
| C | -1.48151500 | -4.69578700 | -0.67102100 |
| C | -1.47996000 | -2.28616200 | -0.44560200 |
| C | -1.49155400 | 0.17664500  | -0.25867200 |
| C | -2.86436000 | -4.71929100 | -0.70541500 |
| H | -0.95118600 | -5.63548500 | -0.77947400 |
| C | -2.91276200 | -2.30505000 | -0.46593500 |
| C | -2.94529700 | 0.15840100  | -0.24520800 |
| C | -3.59605100 | -3.53781100 | -0.59010300 |
| H | -3.37233600 | -5.67230600 | -0.82199100 |
| C | -3.62429500 | -1.07422200 | -0.35344500 |
| C | -5.06758100 | -3.56621700 | -0.60452000 |

|   |             |             |             |
|---|-------------|-------------|-------------|
| C | -5.07888400 | -1.09591100 | -0.35190200 |
| C | -5.78095300 | -4.74063100 | -0.73009200 |
| C | -5.77887900 | -2.31704800 | -0.47477500 |
| C | -5.79844500 | 0.12329100  | -0.22042700 |
| C | -7.20973900 | -4.74942400 | -0.73335000 |
| H | -5.26347700 | -5.70009100 | -0.82926200 |
| C | -7.21630600 | -2.32666400 | -0.47154000 |
| C | -7.23586500 | 0.10567500  | -0.20696700 |
| C | -7.90962100 | -3.58485200 | -0.60697100 |
| H | -7.72113700 | -5.70774600 | -0.83696900 |
| C | -7.91691500 | -1.12802600 | -0.33618200 |
| H | 8.83489200  | 3.98541100  | -0.32437500 |
| H | 8.85017000  | 1.52802500  | -0.36724400 |
| H | 8.87922100  | -0.92640300 | -0.40255200 |
| H | 8.92201300  | -3.38403300 | -0.43284700 |
| H | -9.00029300 | -3.57778100 | -0.60506500 |
| H | -9.01004100 | -1.13509000 | -0.32875000 |
| H | -9.03747400 | 1.30177300  | -0.04883100 |
| H | -9.08250200 | 3.74395300  | 0.22996400  |
| C | 1.85815000  | -1.36904300 | 3.07743200  |
| C | 0.33981900  | -1.05888700 | 3.13901200  |
| C | 0.48252600  | -3.34788800 | 3.39934800  |
| C | 1.93609400  | -2.91333500 | 3.12525900  |
| H | 2.30738800  | -0.98488300 | 2.15595600  |
| H | 2.39421500  | -0.90431900 | 3.91060000  |
| H | 0.03179800  | -0.26680900 | 2.44916000  |
| H | 0.06092800  | -0.74293400 | 4.15145600  |
| H | 0.29747800  | -3.39991900 | 4.47987900  |
| H | 0.23122800  | -4.32143300 | 2.96809300  |
| H | 2.63528200  | -3.27804400 | 3.88393300  |
| H | 2.27008800  | -3.30966500 | 2.15975300  |
| N | -0.37868700 | -2.30336100 | 2.83806100  |
| H | -0.37202300 | -2.42270800 | 1.82693300  |

#### Graphene-S5O

|   |             |            |             |
|---|-------------|------------|-------------|
| C | -5.10854400 | 1.37737800 | -0.16160500 |
| C | -5.83833500 | 2.58555300 | -0.11004900 |
| C | -3.65287000 | 1.39066900 | -0.16816500 |
| C | -7.94657300 | 1.33810300 | -0.14559300 |
| C | -7.27534800 | 2.56029300 | -0.10389200 |
| C | -5.15808900 | 3.85795500 | -0.06262900 |
| C | -2.97125500 | 2.64236700 | -0.11191100 |
| C | -7.99914500 | 3.80761700 | -0.05354700 |
| C | -5.89924800 | 5.02036900 | -0.01528300 |
| C | -3.68612100 | 3.86320400 | -0.06345800 |
| C | -1.53760100 | 2.65708900 | -0.10481000 |
| C | -7.32800200 | 4.99479400 | -0.01129900 |
| H | -5.40545800 | 5.99638000 | 0.02099800  |
| C | -2.98504900 | 5.06696100 | -0.02124600 |
| C | -0.80307500 | 1.42489400 | -0.17402900 |

|   |             |             |             |
|---|-------------|-------------|-------------|
| C | -0.85144700 | 3.89210100  | -0.03833400 |
| H | -7.86231600 | 5.94529400  | 0.02674600  |
| C | -1.60119200 | 5.07440100  | -0.01216100 |
| H | -3.51787200 | 6.01351200  | 0.00417800  |
| C | 0.62242200  | 1.44505800  | -0.18341900 |
| C | 0.61112900  | 3.91151400  | -0.00592900 |
| H | -1.09746200 | 6.03435100  | 0.01119200  |
| C | 1.32663800  | 2.69618800  | -0.09586600 |
| C | 1.32536200  | 5.10856000  | 0.11663600  |
| C | 2.76012500  | 2.71071800  | -0.09224500 |
| C | 2.70891100  | 5.12617300  | 0.12519700  |
| H | 0.80575600  | 6.05209100  | 0.21512700  |
| C | 3.47344800  | 1.48208200  | -0.19585200 |
| C | 3.44427000  | 3.94674800  | 0.01552500  |
| H | 3.22596900  | 6.07897000  | 0.22063500  |
| C | 4.92761700  | 1.50808800  | -0.20242300 |
| C | 4.91723400  | 3.98314700  | 0.01802300  |
| C | 5.62475800  | 2.73447100  | -0.09736000 |
| C | 5.61897600  | 5.16680200  | 0.12480400  |
| C | 7.06154800  | 2.73989500  | -0.10522400 |
| H | 5.10592600  | 6.12102200  | 0.21361500  |
| C | 7.04547000  | 5.16921000  | 0.12005100  |
| C | 7.74833300  | 4.00429600  | 0.00872700  |
| C | 7.76558500  | 1.54248500  | -0.22056600 |
| H | 7.55798200  | 6.12655600  | 0.20701000  |
| C | 7.83972300  | -3.37518500 | -0.67055200 |
| C | 7.79617700  | -0.91298400 | -0.44718600 |
| C | 7.16567600  | -4.55873600 | -0.76256200 |
| C | 7.12234400  | -2.12899700 | -0.54553100 |
| C | 7.09178700  | 0.30568300  | -0.32797500 |
| C | 5.74008500  | -4.59471900 | -0.73344400 |
| H | 7.70151400  | -5.50224500 | -0.85972300 |
| C | 5.68588200  | -2.16176700 | -0.52297100 |
| C | 5.64905100  | 0.28685000  | -0.31444900 |
| C | 5.00972500  | -3.42952500 | -0.61456800 |
| H | 5.25081400  | -5.56224800 | -0.80901900 |
| C | 4.95837500  | -0.95368000 | -0.41250200 |
| C | 3.53714700  | -3.43226300 | -0.57225000 |
| C | 3.50469200  | -0.96556200 | -0.39360800 |
| C | 2.83180500  | -4.63473600 | -0.62489800 |
| C | 2.82163400  | -2.21334400 | -0.47141700 |
| C | 2.79841800  | 0.24985900  | -0.28979800 |
| C | 1.44894400  | -4.65371100 | -0.57726200 |
| H | 3.37276600  | -5.57572200 | -0.70514000 |
| C | 1.38825900  | -2.23764600 | -0.42948800 |
| C | 1.34277600  | 0.22919300  | -0.27154500 |
| C | 0.70407800  | -3.47192100 | -0.47655000 |
| H | 0.95332200  | -5.61384700 | -0.63249600 |
| C | 0.65225200  | -1.00522400 | -0.34130300 |
| C | -0.75754800 | -3.48994900 | -0.42605200 |

|   |             |             |             |
|---|-------------|-------------|-------------|
| C | -0.77286600 | -1.02236300 | -0.32555300 |
| C | -1.47440000 | -4.69073200 | -0.42265900 |
| C | -1.47500400 | -2.27345000 | -0.36703600 |
| C | -1.49000900 | 0.19097600  | -0.24342400 |
| C | -2.85886100 | -4.72165400 | -0.39478100 |
| H | -0.94578600 | -5.63758500 | -0.44126600 |
| C | -2.90656500 | -2.29703100 | -0.33761100 |
| C | -2.94394600 | 0.17261300  | -0.22955100 |
| C | -3.59033100 | -3.53732300 | -0.35991800 |
| H | -3.36564900 | -5.68271400 | -0.39937700 |
| C | -3.62091900 | -1.06514600 | -0.27588700 |
| C | -5.06206700 | -3.57036700 | -0.34351400 |
| C | -5.07661300 | -1.08912500 | -0.25878900 |
| C | -5.77324400 | -4.75167200 | -0.37604000 |
| C | -5.77509000 | -2.31593000 | -0.29436900 |
| C | -5.79815600 | 0.13493200  | -0.20559300 |
| C | -7.20247600 | -4.76354500 | -0.36336000 |
| H | -5.25459900 | -5.71466100 | -0.41289600 |
| C | -7.21266500 | -2.32815900 | -0.28161600 |
| C | -7.23533400 | 0.11626900  | -0.19525600 |
| C | -7.90411500 | -3.59454700 | -0.31817900 |
| H | -7.71181400 | -5.72799700 | -0.39089800 |
| C | -7.91503900 | -1.12454900 | -0.23407400 |
| H | 8.83554700  | 3.99713800  | 0.00287400  |
| H | 8.85173200  | 1.55069800  | -0.22909600 |
| H | 8.88200700  | -0.89203200 | -0.46236900 |
| H | 8.92610000  | -3.33914900 | -0.69026900 |
| H | -8.99455500 | -3.58891900 | -0.30838400 |
| H | -9.00792200 | -1.13229700 | -0.22565700 |
| H | -9.03933600 | 1.31758900  | -0.13971000 |
| H | -9.08917200 | 3.77359700  | -0.05025600 |
| C | 1.83504800  | -1.58980500 | 2.99284300  |
| C | 0.32591200  | -1.29364400 | 2.98698800  |
| C | 0.41795900  | -3.54789600 | 2.90069800  |
| C | 1.89816600  | -3.13366400 | 2.91513900  |
| H | 2.32808400  | -1.13820200 | 2.12694300  |
| H | 2.31881500  | -1.19475100 | 3.89017100  |
| H | 0.04778500  | -0.41584800 | 2.39736500  |
| H | -0.04922800 | -1.16079300 | 4.01415000  |
| H | 0.06848200  | -3.78377200 | 3.91884900  |
| H | 0.20211900  | -4.39846900 | 2.24834800  |
| H | 2.43456200  | -3.57604700 | 3.75892800  |
| H | 2.39920200  | -3.45430800 | 1.99729700  |
| O | -0.28636400 | -2.42820400 | 2.39930400  |

#### Graphene-S5S

|   |             |            |             |
|---|-------------|------------|-------------|
| C | -5.06831900 | 1.30440900 | -0.35852500 |
| C | -5.78617600 | 2.52118300 | -0.39120100 |
| C | -3.61374400 | 1.30405400 | -0.36294700 |
| C | -7.90609500 | 1.29323400 | -0.33993500 |



|   |             |             |             |
|---|-------------|-------------|-------------|
| C | -7.22329800 | 2.50925000  | -0.38938600 |
| C | -5.09305700 | 3.78669200  | -0.42650200 |
| C | -2.91952800 | 2.55075600  | -0.37256000 |
| C | -7.93501100 | 3.76327200  | -0.43713300 |
| C | -5.82366400 | 4.95638100  | -0.47231400 |
| C | -3.62130700 | 3.77894700  | -0.40405000 |
| C | -1.48654300 | 2.55164100  | -0.34052600 |
| C | -7.25223500 | 4.94415900  | -0.47983400 |
| H | -5.32036600 | 5.92793400  | -0.50255800 |
| C | -2.90637100 | 4.97625000  | -0.41658600 |
| C | -0.76443500 | 1.31013800  | -0.35301400 |
| C | -0.78771500 | 3.77969700  | -0.30740300 |
| H | -7.77784800 | 5.89966100  | -0.51821600 |
| C | -1.52333200 | 4.97006100  | -0.37101200 |
| H | -3.42821400 | 5.92799900  | -0.46097800 |
| C | 0.66114900  | 1.31523700  | -0.33852200 |
| C | 0.67242200  | 3.78390100  | -0.21371800 |
| H | -1.00685600 | 5.92339200  | -0.39467400 |
| C | 1.37664300  | 2.55948200  | -0.25781500 |
| C | 1.39531100  | 4.97323100  | -0.07151100 |
| C | 2.80942100  | 2.55747800  | -0.20832000 |
| C | 2.77847800  | 4.97499300  | -0.01485800 |
| H | 0.88172700  | 5.92181700  | 0.00982600  |
| C | 3.51119100  | 1.31992700  | -0.28386400 |
| C | 3.50414000  | 3.78684400  | -0.09149300 |
| H | 3.30254600  | 5.92244400  | 0.09259500  |
| C | 4.96522900  | 1.33017800  | -0.26823400 |
| C | 4.97683300  | 3.80542300  | -0.04702700 |
| C | 5.67303900  | 2.54854800  | -0.14933500 |
| C | 5.68951800  | 4.97993600  | 0.08156000  |
| C | 7.10982100  | 2.53767500  | -0.13125500 |
| H | 5.18596200  | 5.93992800  | 0.16287400  |
| C | 7.11606700  | 4.96572500  | 0.10897700  |
| C | 7.80803100  | 3.79382500  | 0.00484200  |
| C | 7.80238700  | 1.33343200  | -0.24433200 |
| H | 7.63718800  | 5.91671300  | 0.21353800  |
| C | 7.82827200  | -3.58053500 | -0.75251900 |
| C | 7.80914400  | -1.12070500 | -0.49796900 |
| C | 7.14260600  | -4.75550400 | -0.86356500 |
| C | 7.12325300  | -2.32817100 | -0.61661700 |
| C | 7.11712700  | 0.10466900  | -0.37276300 |
| C | 5.71605400  | -4.77707300 | -0.84201100 |
| H | 7.66896400  | -5.70348700 | -0.96924800 |
| C | 5.68642900  | -2.34634400 | -0.60479500 |
| C | 5.67459800  | 0.10115700  | -0.37618700 |
| C | 4.99700600  | -3.60654000 | -0.71256100 |
| H | 5.21769100  | -5.73919600 | -0.92927800 |
| C | 4.97210600  | -1.13149600 | -0.48869400 |
| C | 3.52420700  | -3.59578300 | -0.66948100 |
| C | 3.51825700  | -1.12860800 | -0.47810400 |

|   |             |             |             |
|---|-------------|-------------|-------------|
| C | 2.80449400  | -4.78833400 | -0.73791700 |
| C | 2.82332600  | -2.36997100 | -0.55612700 |
| C | 2.82499200  | 0.09419600  | -0.38301500 |
| C | 1.42203400  | -4.79399100 | -0.67005200 |
| H | 3.33320600  | -5.73334300 | -0.84413700 |
| C | 1.39088900  | -2.37913100 | -0.49903400 |
| C | 1.36992000  | 0.09068600  | -0.38237200 |
| C | 0.69382200  | -3.60759200 | -0.52710200 |
| H | 0.91237300  | -5.74541400 | -0.74274200 |
| C | 0.66817300  | -1.13737600 | -0.42263000 |
| C | -0.76507500 | -3.61106100 | -0.41070900 |
| C | -0.75704300 | -1.14036000 | -0.39640100 |
| C | -1.49114000 | -4.80542700 | -0.31825400 |
| C | -1.47129100 | -2.38706400 | -0.38016800 |
| C | -1.46335900 | 0.08238900  | -0.37158700 |
| C | -2.87291500 | -4.82026800 | -0.24913600 |
| H | -0.96719800 | -5.75455000 | -0.28940000 |
| C | -2.90319300 | -2.39537500 | -0.31903800 |
| C | -2.91696600 | 0.07774600  | -0.35273700 |
| C | -3.59583500 | -3.62770000 | -0.26154300 |
| H | -3.38719300 | -5.77475000 | -0.18222800 |
| C | -3.60526500 | -1.15365100 | -0.31991800 |
| C | -5.06670000 | -3.64473000 | -0.20958000 |
| C | -5.05950000 | -1.16289800 | -0.29017300 |
| C | -5.78851600 | -4.81883800 | -0.14204200 |
| C | -5.76859000 | -2.38389100 | -0.23533400 |
| C | -5.76943600 | 0.06855100  | -0.31628700 |
| C | -7.21675000 | -4.81586100 | -0.10341000 |
| H | -5.27823400 | -5.78697800 | -0.11679300 |
| C | -7.20568300 | -2.38109500 | -0.20391900 |
| C | -7.20697800 | 0.06405500  | -0.29885600 |
| C | -7.90797100 | -3.63967600 | -0.13541600 |
| H | -7.73499700 | -5.77460800 | -0.04863700 |
| C | -7.89714000 | -1.16992800 | -0.23928800 |
| H | 8.89507600  | 3.77453500  | 0.02163400  |
| H | 8.88867400  | 1.32976900  | -0.23514700 |
| H | 8.89541300  | -1.11154000 | -0.50202400 |
| H | 8.91525600  | -3.55579200 | -0.76453900 |
| H | -8.99825800 | -3.62356600 | -0.10879800 |
| H | -8.99022400 | -1.16735900 | -0.21974800 |
| H | -8.99928200 | 1.28397500  | -0.33225100 |
| H | -9.02548600 | 3.74023500  | -0.43838300 |
| C | 1.54557600  | 0.21573100  | 3.15108500  |
| C | 0.02770200  | 0.41317100  | 3.11925600  |
| C | 0.54768700  | -2.10221800 | 3.05581200  |
| C | 1.85461000  | -1.28920900 | 2.96526000  |
| H | 2.03211700  | 0.82548600  | 2.37969400  |
| H | 1.92538100  | 0.55201700  | 4.12039400  |
| H | -0.34681500 | 0.46971900  | 2.09403400  |
| H | -0.29341700 | 1.30816900  | 3.65640900  |

|   |             |             |            |
|---|-------------|-------------|------------|
| H | 0.67295700  | -3.03774300 | 3.60473700 |
| H | 0.16274800  | -2.34187900 | 2.06043100 |
| H | 2.55197400  | -1.62033400 | 3.74023600 |
| H | 2.34062200  | -1.47731000 | 2.00212700 |
| S | -0.67601500 | -1.06296200 | 3.92647600 |

Graphene-U5C

|   |             |             |             |
|---|-------------|-------------|-------------|
| C | -4.98588500 | 1.36060600  | -0.15711000 |
| C | -5.69415700 | 2.58097000  | -0.06727800 |
| C | -3.53142100 | 1.35011100  | -0.17961300 |
| C | -7.82372300 | 1.36454900  | -0.11768100 |
| C | -7.13082900 | 2.57174600  | -0.04644000 |
| C | -4.99771300 | 3.84011300  | 0.00292800  |
| C | -2.82974500 | 2.58749200  | -0.11888700 |
| C | -7.82940800 | 3.83143000  | 0.04855800  |
| C | -5.71076800 | 5.01801900  | 0.09238900  |
| C | -3.52500300 | 3.81906500  | -0.02667800 |
| C | -1.39642500 | 2.58719400  | -0.15135500 |
| C | -7.13750700 | 5.00600000  | 0.11546000  |
| H | -5.20660000 | 5.98003400  | 0.14636100  |
| C | -2.80057800 | 5.00798500  | 0.04156500  |
| C | -0.68125700 | 1.34261600  | -0.22481500 |
| C | -0.69239600 | 3.81212200  | -0.10243400 |
| H | -7.65829400 | 5.96021900  | 0.18724400  |
| C | -1.41694300 | 5.00381900  | 0.00757000  |
| H | -3.32530300 | 5.95751000  | 0.12531000  |
| C | 0.74424500  | 1.33698700  | -0.23475300 |
| C | 0.76936300  | 3.80700600  | -0.15960900 |
| H | -0.90514700 | 5.95416400  | 0.07749800  |
| C | 1.46706000  | 2.57667000  | -0.19985400 |
| C | 1.50725100  | 4.99638800  | -0.18005200 |
| C | 2.90069600  | 2.57569400  | -0.21603300 |
| C | 2.89147400  | 5.00185100  | -0.20341800 |
| H | 0.99416400  | 5.95171600  | -0.18348800 |
| C | 3.59375200  | 1.33008800  | -0.23030600 |
| C | 3.60435300  | 3.80460200  | -0.21162800 |
| H | 3.41515700  | 5.95383000  | -0.21448400 |
| C | 5.04948500  | 1.32963100  | -0.21341100 |
| C | 5.07633500  | 3.81262700  | -0.21795000 |
| C | 5.76805900  | 2.54522200  | -0.20916300 |
| C | 5.80695200  | 4.98246900  | -0.22574500 |
| C | 7.20528200  | 2.53251700  | -0.19559600 |
| H | 5.30513000  | 5.95461400  | -0.23514800 |
| C | 7.23601600  | 4.96920700  | -0.22017500 |
| C | 7.91774100  | 3.78755100  | -0.20340200 |
| C | 7.88726900  | 1.31604500  | -0.17391200 |
| H | 7.76191700  | 5.92504100  | -0.22802700 |
| C | 7.88606300  | -3.62011000 | -0.10001500 |
| C | 7.87672600  | -1.14868700 | -0.13963700 |
| C | 7.19456000  | -4.79611900 | -0.10080600 |

|   |             |             |             |
|---|-------------|-------------|-------------|
| C | 7.18452300  | -2.35940800 | -0.13841900 |
| C | 7.18694500  | 0.08654800  | -0.17039500 |
| C | 5.76597100  | -4.79792200 | -0.14293900 |
| H | 7.71203600  | -5.75609500 | -0.07055200 |
| C | 5.74757600  | -2.36061500 | -0.17606100 |
| C | 5.75004200  | 0.09228300  | -0.19751900 |
| C | 5.04555000  | -3.62241100 | -0.18123000 |
| H | 5.25623500  | -5.76598300 | -0.14486800 |
| C | 5.03934800  | -1.13939900 | -0.20634700 |
| C | 3.57455300  | -3.60279500 | -0.23339400 |
| C | 3.58408400  | -1.12825000 | -0.24800300 |
| C | 2.85169400  | -4.79357000 | -0.23274300 |
| C | 2.88156200  | -2.36750300 | -0.27662900 |
| C | 2.89526000  | 0.10423900  | -0.25667100 |
| C | 1.46779500  | -4.77684400 | -0.29646300 |
| H | 3.36572300  | -5.74931400 | -0.17800200 |
| C | 1.44941000  | -2.35731800 | -0.33978400 |
| C | 1.44232400  | 0.10934000  | -0.28084000 |
| C | 0.74280900  | -3.58308100 | -0.37332000 |
| H | 0.94476600  | -5.72658700 | -0.27091600 |
| C | 0.73610800  | -1.11270700 | -0.33698700 |
| C | -0.71645900 | -3.57861400 | -0.45346400 |
| C | -0.68878500 | -1.10983300 | -0.33291600 |
| C | -1.44722100 | -4.76502100 | -0.57458900 |
| C | -1.41248900 | -2.34991900 | -0.39745700 |
| C | -1.39008300 | 0.11871500  | -0.27606800 |
| C | -2.83166600 | -4.76219300 | -0.58644800 |
| H | -0.93993700 | -5.71576100 | -0.66978700 |
| C | -2.84562800 | -2.34294400 | -0.40647100 |
| C | -2.84450300 | 0.12333200  | -0.26240300 |
| C | -3.54882300 | -3.57092800 | -0.48907000 |
| H | -3.36269500 | -5.70785300 | -0.67453800 |
| C | -3.53965300 | -1.10188000 | -0.32568800 |
| C | -5.02184900 | -3.58463000 | -0.48373800 |
| C | -4.99389800 | -1.10554900 | -0.31622400 |
| C | -5.74263700 | -4.75878300 | -0.55989000 |
| C | -5.71002200 | -2.32234700 | -0.39141400 |
| C | -5.69602200 | 0.12934300  | -0.22739500 |
| C | -7.16939200 | -4.73963900 | -0.54818700 |
| H | -5.24473100 | -5.72286400 | -0.63088500 |
| C | -7.14683600 | -2.30602000 | -0.37788700 |
| C | -7.13792500 | 0.13276100  | -0.21036600 |
| C | -7.85366800 | -3.56202300 | -0.45989300 |
| H | -7.69652700 | -5.69098400 | -0.61140600 |
| C | -7.83177800 | -1.09573500 | -0.28684100 |
| H | 9.00788400  | 3.76331900  | -0.19595300 |
| H | 8.97976900  | 1.30534000  | -0.15903800 |
| H | 8.96910300  | -1.14671900 | -0.11542400 |
| H | 8.97597100  | -3.60456300 | -0.06993600 |
| H | -8.94079000 | -3.53800600 | -0.44986700 |

|   |             |             |             |
|---|-------------|-------------|-------------|
| H | -8.91823100 | -1.08672300 | -0.27526800 |
| H | -8.91020800 | 1.36090700  | -0.10340900 |
| H | -8.91660000 | 3.81276900  | 0.06444100  |
| C | -1.55282600 | -1.29607000 | 2.97739500  |
| H | -2.28499100 | -1.16879600 | 2.16504200  |
| H | -2.13852400 | -1.29471800 | 3.90885900  |
| C | -0.75018200 | -2.55659000 | 2.83389100  |
| H | -1.18846300 | -3.54623600 | 2.76706400  |
| C | 0.55853700  | -2.24775100 | 2.79405200  |
| H | 1.38114500  | -2.94727300 | 2.69415400  |
| C | -0.50423500 | -0.22103200 | 2.98454100  |
| H | -0.72602600 | 0.83779600  | 3.05612100  |
| C | 0.71204800  | -0.78761200 | 2.88764000  |
| H | 1.66318500  | -0.26740900 | 2.86441200  |

#### Graphene-U5N

|   |             |            |             |
|---|-------------|------------|-------------|
| C | -5.07751100 | 1.30925600 | -0.17430100 |
| C | -5.79965900 | 2.52394200 | -0.16268700 |
| C | -3.62285500 | 1.31313900 | -0.20401100 |
| C | -7.91522300 | 1.28933500 | -0.10554700 |
| C | -7.23653400 | 2.50815700 | -0.13147900 |
| C | -5.11112200 | 3.79197100 | -0.18219000 |
| C | -2.93297200 | 2.56244200 | -0.20618100 |
| C | -7.95242800 | 3.76073100 | -0.12675200 |
| C | -5.84542500 | 4.96024600 | -0.17724800 |
| C | -3.63931600 | 3.78812600 | -0.20037900 |
| C | -1.49946300 | 2.56729800 | -0.21066800 |
| C | -7.27374900 | 4.94443100 | -0.15049400 |
| H | -5.34485300 | 5.93385200 | -0.19275700 |
| C | -2.93012000 | 4.98864700 | -0.21582700 |
| C | -0.77290600 | 1.32742200 | -0.24766200 |
| C | -0.80560500 | 3.79826800 | -0.18907900 |
| H | -7.80221000 | 5.89919300 | -0.14827400 |
| C | -1.54695200 | 4.98684400 | -0.21276100 |
| H | -3.45650900 | 5.93885000 | -0.22924200 |
| C | 0.65070600  | 1.33746400 | -0.26155400 |
| C | 0.65639800  | 3.80830500 | -0.14227200 |
| H | -1.03583600 | 5.94283200 | -0.23507000 |
| C | 1.36329300  | 2.58648700 | -0.19230500 |
| C | 1.37791800  | 5.00348900 | -0.03576700 |
| C | 2.79614800  | 2.59073100 | -0.15882100 |
| C | 2.76054700  | 5.01116000 | -0.00414400 |
| H | 0.86294900  | 5.95208400 | 0.03632900  |
| C | 3.50111800  | 1.35233500 | -0.21086600 |
| C | 3.48821500  | 3.82262700 | -0.06931600 |
| H | 3.28415600  | 5.96163500 | 0.07805400  |
| C | 4.95477100  | 1.36622100 | -0.17634300 |
| C | 4.96123900  | 3.84732600 | -0.03438300 |
| C | 5.65979600  | 2.59004300 | -0.08909900 |
| C | 5.67021600  | 5.02873100 | 0.04884900  |

|   |             |             |             |
|---|-------------|-------------|-------------|
| C | 7.09615600  | 2.58293300  | -0.05604400 |
| H | 5.16378300  | 5.98943100  | 0.09000000  |
| C | 7.09595800  | 5.01883500  | 0.08220700  |
| C | 7.79093000  | 3.84474700  | 0.03246700  |
| C | 7.79198200  | 1.37612000  | -0.10877500 |
| H | 7.61506700  | 5.97432200  | 0.14828600  |
| C | 7.83366600  | -3.55378000 | -0.40010900 |
| C | 7.80628900  | -1.08574400 | -0.25237500 |
| C | 7.15193200  | -4.73360400 | -0.48382900 |
| C | 7.12463700  | -2.29817100 | -0.33843100 |
| C | 7.11087000  | 0.14240500  | -0.19640800 |
| C | 5.72618400  | -4.75654100 | -0.50940400 |
| H | 7.68197200  | -5.68413800 | -0.53279200 |
| C | 5.68791200  | -2.31832100 | -0.36638000 |
| C | 5.66752600  | 0.13606500  | -0.22812900 |
| C | 5.00378800  | -3.58173300 | -0.45193600 |
| H | 5.23080500  | -5.72136000 | -0.57702000 |
| C | 4.96896300  | -1.10082600 | -0.31396500 |
| C | 3.53036300  | -3.57048600 | -0.46922600 |
| C | 3.51570900  | -1.09997800 | -0.33832100 |
| C | 2.81641900  | -4.76771400 | -0.53793200 |
| C | 2.82354500  | -2.34488600 | -0.41638300 |
| C | 2.81725600  | 0.12449300  | -0.29513600 |
| C | 1.43353000  | -4.77399200 | -0.53399800 |
| H | 3.35199900  | -5.71357200 | -0.59304900 |
| C | 1.39044800  | -2.35505500 | -0.42051700 |
| C | 1.36202000  | 0.11627000  | -0.31749900 |
| C | 0.69795600  | -3.58462900 | -0.45647500 |
| H | 0.93040600  | -5.72992500 | -0.59122600 |
| C | 0.66376600  | -1.11418300 | -0.36000600 |
| C | -0.76213900 | -3.59144700 | -0.38470300 |
| C | -0.75861200 | -1.12128500 | -0.33191500 |
| C | -1.48780100 | -4.78888300 | -0.34702300 |
| C | -1.46948500 | -2.36953200 | -0.32866800 |
| C | -1.46751700 | 0.09819200  | -0.27165200 |
| C | -2.86925200 | -4.80905500 | -0.27833500 |
| H | -0.96594400 | -5.73903300 | -0.36449100 |
| C | -2.90157200 | -2.38313600 | -0.26286000 |
| C | -2.92178600 | 0.08954800  | -0.23217300 |
| C | -3.59243500 | -3.61771400 | -0.23993400 |
| H | -3.38244100 | -5.76618300 | -0.25244800 |
| C | -3.60718600 | -1.14393600 | -0.22139000 |
| C | -5.06281000 | -3.64065600 | -0.17576800 |
| C | -5.06137800 | -1.15818600 | -0.17494300 |
| C | -5.78112300 | -4.81837300 | -0.14193400 |
| C | -5.76762700 | -2.38181900 | -0.15092900 |
| C | -5.77489000 | 0.07103400  | -0.15467600 |
| C | -7.20883700 | -4.82123200 | -0.08718200 |
| H | -5.26784700 | -5.78543000 | -0.15697300 |
| C | -7.20428500 | -2.38460300 | -0.10150600 |

|   |             |             |             |
|---|-------------|-------------|-------------|
| C | -7.21207900 | 0.06184900  | -0.11503400 |
| C | -7.90304300 | -3.64656300 | -0.06893900 |
| H | -7.72405100 | -5.78287500 | -0.06129100 |
| C | -7.89888800 | -1.17496300 | -0.08617700 |
| H | 8.87768700  | 3.82850600  | 0.05707000  |
| H | 8.87773400  | 1.37522300  | -0.08458600 |
| H | 8.89198000  | -1.07472800 | -0.23015000 |
| H | 8.92026300  | -3.52779500 | -0.37965300 |
| H | -8.99303900 | -3.63430900 | -0.02906200 |
| H | -8.99177700 | -1.17593900 | -0.05128400 |
| H | -9.00823100 | 1.27643400  | -0.07785900 |
| H | -9.04265500 | 3.73431800  | -0.10408000 |
| C | 0.92186700  | -0.18016200 | 2.83227200  |
| C | -0.33611400 | -0.70879100 | 3.00052900  |
| C | -0.21449500 | -2.12487900 | 2.91270800  |
| C | 1.11396100  | -2.40698900 | 2.69573300  |
| N | 1.79347200  | -1.22063800 | 2.65503400  |
| H | 2.77235500  | -1.12265000 | 2.42365400  |
| H | 1.26865700  | 0.84344100  | 2.80807600  |
| H | -1.24189500 | -0.14359500 | 3.16545800  |
| H | -1.00824500 | -2.85285500 | 2.99835400  |
| H | 1.62860100  | -3.34615800 | 2.54714300  |

#### Graphene-U5O

|   |             |            |             |
|---|-------------|------------|-------------|
| C | -5.07084400 | 1.31734900 | -0.18536600 |
| C | -5.78971800 | 2.53413800 | -0.17544700 |
| C | -3.61612800 | 1.31766500 | -0.20824200 |
| C | -7.90843400 | 1.29924800 | -0.13314600 |
| C | -7.22631600 | 2.51437600 | -0.15345900 |
| C | -5.10378700 | 3.80156900 | -0.18773000 |
| C | -2.92519700 | 2.56150400 | -0.20210100 |
| C | -7.93619200 | 3.77147600 | -0.15259000 |
| C | -5.82766900 | 4.97600000 | -0.18685200 |
| C | -3.63092200 | 3.79122300 | -0.19524700 |
| C | -1.49154900 | 2.57108100 | -0.19890300 |
| C | -7.25472300 | 4.95370300 | -0.17037700 |
| H | -5.33175600 | 5.94414900 | -0.19792100 |
| C | -2.91697400 | 4.98787800 | -0.19961300 |
| C | -0.76613100 | 1.33144300 | -0.23566800 |
| C | -0.79781800 | 3.80299900 | -0.17119200 |
| H | -7.78358000 | 5.90622800 | -0.17134800 |
| C | -1.53260500 | 4.99305600 | -0.18984000 |
| H | -3.45009300 | 5.93627800 | -0.21007800 |
| C | 0.66030800  | 1.33754900 | -0.24139900 |
| C | 0.66408900  | 3.80627900 | -0.12279600 |
| H | -1.02839300 | 5.94992700 | -0.20424400 |
| C | 1.37228000  | 2.58143400 | -0.17268900 |
| C | 1.39163000  | 4.99682500 | -0.01627200 |
| C | 2.80583700  | 2.59034100 | -0.14123800 |
| C | 2.77589800  | 5.01176100 | 0.01404000  |

|   |             |             |             |
|---|-------------|-------------|-------------|
| H | 0.87115300  | 5.94548000  | 0.05419800  |
| C | 3.50930100  | 1.35189100  | -0.19775400 |
| C | 3.49897300  | 3.82285200  | -0.05370300 |
| H | 3.29121200  | 5.96500400  | 0.09528000  |
| C | 4.96503900  | 1.36349800  | -0.17202300 |
| C | 4.97048200  | 3.84252700  | -0.02651500 |
| C | 5.67282100  | 2.58238900  | -0.08923300 |
| C | 5.69014600  | 5.01624800  | 0.05430200  |
| C | 7.10995100  | 2.58117000  | -0.06652000 |
| H | 5.18018600  | 5.98260000  | 0.10217000  |
| C | 7.11909400  | 5.01399600  | 0.07809900  |
| C | 7.81107600  | 3.83973700  | 0.01978700  |
| C | 7.80308500  | 1.37261400  | -0.12822600 |
| H | 7.63643600  | 5.97213600  | 0.14352500  |
| C | 7.84795000  | -3.55438500 | -0.42433600 |
| C | 7.81550300  | -1.08746600 | -0.27605600 |
| C | 7.16750800  | -4.73420500 | -0.50192600 |
| C | 7.13439400  | -2.30159900 | -0.35660800 |
| C | 7.11387600  | 0.13971400  | -0.21191500 |
| C | 5.73843500  | -4.74831000 | -0.51536900 |
| H | 7.69426700  | -5.68797700 | -0.55461200 |
| C | 5.69718200  | -2.31469600 | -0.37277900 |
| C | 5.67693100  | 0.13372300  | -0.23215800 |
| C | 5.00720800  | -3.58073200 | -0.45200600 |
| H | 5.23804100  | -5.71880000 | -0.57766700 |
| C | 4.97711400  | -1.10183300 | -0.31216000 |
| C | 3.53539000  | -3.57316400 | -0.45957600 |
| C | 3.52095900  | -1.10254400 | -0.32862000 |
| C | 2.82467700  | -4.76920800 | -0.52789700 |
| C | 2.82946900  | -2.34561600 | -0.40096700 |
| C | 2.82114800  | 0.12225000  | -0.27642600 |
| C | 1.43912100  | -4.76626300 | -0.52078300 |
| H | 3.34993100  | -5.71863800 | -0.58810300 |
| C | 1.39613100  | -2.34905000 | -0.40001500 |
| C | 1.36908100  | 0.11549400  | -0.29466000 |
| C | 0.70005500  | -3.58170900 | -0.43792700 |
| H | 0.92875900  | -5.72109400 | -0.58211400 |
| C | 0.67176700  | -1.11255400 | -0.34630300 |
| C | -0.76034900 | -3.59257400 | -0.36830400 |
| C | -0.75418000 | -1.12148400 | -0.32567600 |
| C | -1.48127000 | -4.79023800 | -0.32120000 |
| C | -1.46642100 | -2.36809300 | -0.32746800 |
| C | -1.46522900 | 0.10114300  | -0.26996700 |
| C | -2.86456200 | -4.80027200 | -0.26120300 |
| H | -0.96707100 | -5.74188800 | -0.32366700 |
| C | -2.89881900 | -2.37402300 | -0.26533300 |
| C | -2.91882900 | 0.09353600  | -0.23624600 |
| C | -3.59103200 | -3.61144000 | -0.23875600 |
| H | -3.38647200 | -5.75448700 | -0.22930200 |
| C | -3.60311000 | -1.13828700 | -0.22957000 |



|   |             |             |             |
|---|-------------|-------------|-------------|
| C | -5.06274900 | -3.63805000 | -0.18412600 |
| C | -5.05725700 | -1.15380800 | -0.18763900 |
| C | -5.77307300 | -4.82039700 | -0.15493900 |
| C | -5.76254200 | -2.37833000 | -0.16563800 |
| C | -5.77030500 | 0.07792800  | -0.17067800 |
| C | -7.19964500 | -4.81378400 | -0.10925700 |
| H | -5.26665000 | -5.78302600 | -0.16741600 |
| C | -7.19887500 | -2.37432200 | -0.12458300 |
| C | -7.21116800 | 0.07000200  | -0.13878600 |
| C | -7.89423600 | -3.63916600 | -0.09557300 |
| H | -7.71749000 | -5.77207500 | -0.08678400 |
| C | -7.89452000 | -1.16678100 | -0.11390100 |
| H | 8.90112200  | 3.82379400  | 0.03684600  |
| H | 8.89527300  | 1.37052200  | -0.11194000 |
| H | 8.90763600  | -1.07624100 | -0.26178000 |
| H | 8.93788200  | -3.52944600 | -0.41193900 |
| H | -8.98126200 | -3.62421000 | -0.06262900 |
| H | -8.98104300 | -1.16641400 | -0.08611400 |
| H | -8.99508200 | 1.28696300  | -0.11319000 |
| H | -9.02340500 | 3.74453900  | -0.13806100 |
| C | 0.80118600  | -0.22871600 | 2.86300600  |
| C | -0.44403600 | -0.75651200 | 2.96598800  |
| C | -0.27904400 | -2.17898100 | 2.86535000  |
| C | 1.05231700  | -2.38890700 | 2.71110200  |
| O | 1.72442000  | -1.21113400 | 2.70825200  |
| H | 1.18526200  | 0.77992200  | 2.86869900  |
| H | -1.36995000 | -0.20991400 | 3.08064700  |
| H | -1.05377200 | -2.93292100 | 2.88886100  |
| H | 1.65657100  | -3.27399900 | 2.58146600  |

#### Graphene-U5S

|   |             |            |             |
|---|-------------|------------|-------------|
| C | -5.09303900 | 1.32401900 | -0.23987800 |
| C | -5.81387900 | 2.54027100 | -0.23316200 |
| C | -3.63866800 | 1.32689500 | -0.26167800 |
| C | -7.93049400 | 1.30100200 | -0.19125100 |
| C | -7.25044900 | 2.51738400 | -0.21484500 |
| C | -5.13032400 | 3.80836500 | -0.24483300 |
| C | -2.94953800 | 2.57250900 | -0.25039900 |
| C | -7.96213100 | 3.77330600 | -0.22054000 |
| C | -5.85572500 | 4.98212200 | -0.25007600 |
| C | -3.65717300 | 3.80047300 | -0.24388200 |
| C | -1.51602100 | 2.58432900 | -0.23934900 |
| C | -7.28243700 | 4.95675100 | -0.23955600 |
| H | -5.36154700 | 5.95072100 | -0.26144200 |
| C | -2.94460400 | 4.99852100 | -0.24034800 |
| C | -0.78832000 | 1.34534300 | -0.28030500 |
| C | -0.82420400 | 3.81634600 | -0.20084100 |
| H | -7.81327400 | 5.90810300 | -0.24575600 |
| C | -1.56059200 | 5.00588200 | -0.22114100 |
| H | -3.47955000 | 5.94595700 | -0.25205500 |

|   |             |             |             |
|---|-------------|-------------|-------------|
| C | 0.63728500  | 1.35329600  | -0.28019800 |
| C | 0.63748900  | 3.82092200  | -0.14166400 |
| H | -1.05730800 | 5.96331600  | -0.23086900 |
| C | 1.34749600  | 2.59820500  | -0.20055700 |
| C | 1.36292400  | 5.01133000  | -0.01558500 |
| C | 2.78092200  | 2.60883100  | -0.16688100 |
| C | 2.74681200  | 5.02786300  | 0.01952200  |
| H | 0.84027800  | 5.95792600  | 0.06694500  |
| C | 3.48640000  | 1.37159800  | -0.24079400 |
| C | 3.47185900  | 3.84059500  | -0.06311100 |
| H | 3.26021800  | 5.98069100  | 0.11516800  |
| C | 4.94207100  | 1.38531500  | -0.22496300 |
| C | 4.94349800  | 3.86150800  | -0.03652800 |
| C | 5.64806200  | 2.60428300  | -0.12512300 |
| C | 5.66196500  | 5.03447200  | 0.06551800  |
| C | 7.08532200  | 2.60533400  | -0.11084200 |
| H | 5.15016300  | 5.99896900  | 0.13456400  |
| C | 7.09093200  | 5.03452900  | 0.08388800  |
| C | 7.78476300  | 3.86296000  | -0.00215600 |
| C | 7.78016600  | 1.39936700  | -0.20230200 |
| H | 7.60693100  | 5.99213700  | 0.16728300  |
| C | 7.83163700  | -3.52059300 | -0.60362700 |
| C | 7.79584100  | -1.05729700 | -0.40270900 |
| C | 7.15252300  | -4.70018200 | -0.69647300 |
| C | 7.11639400  | -2.27127300 | -0.50086100 |
| C | 7.09279600  | 0.16701100  | -0.30590900 |
| C | 5.72347200  | -4.71713800 | -0.69015300 |
| H | 7.68050500  | -5.65156300 | -0.77596400 |
| C | 5.67904500  | -2.28734500 | -0.49961100 |
| C | 5.65562400  | 0.15846300  | -0.31289400 |
| C | 4.99022600  | -3.55292800 | -0.59351900 |
| H | 5.22380500  | -5.68761500 | -0.76398700 |
| C | 4.95769800  | -1.07686300 | -0.40792800 |
| C | 3.51830000  | -3.54956900 | -0.57675600 |
| C | 3.50183900  | -1.08081300 | -0.40615200 |
| C | 2.80816900  | -4.74580800 | -0.65805300 |
| C | 2.81194800  | -2.32536800 | -0.48528600 |
| C | 2.80039700  | 0.14206200  | -0.33065800 |
| C | 1.42360400  | -4.74541400 | -0.62422800 |
| H | 3.33318800  | -5.69258000 | -0.75099000 |
| C | 1.37913800  | -2.33147200 | -0.45646300 |
| C | 1.34760000  | 0.13297000  | -0.33728000 |
| C | 0.68502200  | -3.56342800 | -0.49795900 |
| H | 0.91126300  | -5.69776700 | -0.70740900 |
| C | 0.65244100  | -1.09567000 | -0.38929400 |
| C | -0.77396400 | -3.57743100 | -0.40401600 |
| C | -0.77239300 | -1.10653800 | -0.37841600 |
| C | -1.48971500 | -4.77648000 | -0.31880200 |
| C | -1.48292500 | -2.35530000 | -0.37775500 |
| C | -1.48540200 | 0.11458700  | -0.32385800 |

|   |             |             |             |
|---|-------------|-------------|-------------|
| C | -2.87270500 | -4.78938100 | -0.25549800 |
| H | -0.97005500 | -5.72490800 | -0.28940100 |
| C | -2.91469400 | -2.36387000 | -0.30938800 |
| C | -2.93948900 | 0.10433300  | -0.29105500 |
| C | -3.60342200 | -3.60220200 | -0.26173800 |
| H | -3.39183400 | -5.74387900 | -0.19612000 |
| C | -3.62141500 | -1.12861300 | -0.27963600 |
| C | -5.07530800 | -3.63143900 | -0.20784700 |
| C | -5.07491600 | -1.14693300 | -0.23292800 |
| C | -5.78265000 | -4.81559200 | -0.16990900 |
| C | -5.77737300 | -2.37347200 | -0.20054900 |
| C | -5.79015100 | 0.08348200  | -0.22147900 |
| C | -7.20891800 | -4.81088500 | -0.12536300 |
| H | -5.27440800 | -5.77685300 | -0.17498700 |
| C | -7.21374600 | -2.37142100 | -0.15972000 |
| C | -7.23172800 | 0.07295000  | -0.19001300 |
| C | -7.90612100 | -3.63754300 | -0.12126800 |
| H | -7.72516100 | -5.76980400 | -0.09595900 |
| C | -7.91186100 | -1.16519000 | -0.15799500 |
| H | 8.87505700  | 3.84895300  | 0.00930100  |
| H | 8.87279200  | 1.39941200  | -0.19410800 |
| H | 8.88840900  | -1.04421300 | -0.40005200 |
| H | 8.92174200  | -3.49367100 | -0.60510900 |
| H | -8.99301500 | -3.62463900 | -0.08919500 |
| H | -8.99808100 | -1.16701600 | -0.13130400 |
| H | -9.01683500 | 1.28704900  | -0.17359800 |
| H | -9.04916300 | 3.74459600  | -0.20995600 |
| C | 0.65327300  | -0.02799000 | 2.94716400  |
| C | -0.59222800 | -0.57232300 | 2.86003100  |
| C | -0.56149900 | -2.00186800 | 2.79029900  |
| C | 0.70663300  | -2.49830300 | 2.82587700  |
| H | 0.92352700  | 1.01800900  | 2.99816900  |
| H | -1.50321700 | 0.01679100  | 2.82734000  |
| H | -1.44644400 | -2.62379700 | 2.69912300  |
| H | 1.02266300  | -3.53128300 | 2.77677700  |
| S | 1.88132300  | -1.23988300 | 2.95467500  |

#### Graphene-U6C

|   |             |            |             |
|---|-------------|------------|-------------|
| C | -4.95258000 | 1.37051900 | -0.26590000 |
| C | -5.66088600 | 2.59104100 | -0.22445200 |
| C | -3.49636700 | 1.35812200 | -0.28022700 |
| C | -7.79111300 | 1.38086900 | -0.24470700 |
| C | -7.09821300 | 2.59063500 | -0.21662500 |
| C | -4.95890300 | 3.85241300 | -0.18888800 |
| C | -2.79317000 | 2.59690400 | -0.23759400 |
| C | -7.79972300 | 3.85145800 | -0.17884400 |
| C | -5.67875300 | 5.02819800 | -0.15360300 |
| C | -3.48716300 | 3.83127700 | -0.19025300 |
| C | -1.35910100 | 2.58663900 | -0.24005900 |
| C | -7.10794400 | 5.02683500 | -0.14912500 |

|   |             |             |             |
|---|-------------|-------------|-------------|
| H | -5.16903600 | 5.99541500  | -0.12772900 |
| C | -2.76508700 | 5.02150200  | -0.14259100 |
| C | -0.64713100 | 1.34229700  | -0.29459400 |
| C | -0.65163800 | 3.81192600  | -0.18487100 |
| H | -7.62553100 | 5.98664100  | -0.12094800 |
| C | -1.38060900 | 5.00540000  | -0.13831500 |
| H | -3.28170300 | 5.97682900  | -0.10487800 |
| C | 0.77915700  | 1.33559000  | -0.27458100 |
| C | 0.81101900  | 3.80639600  | -0.17093600 |
| H | -0.86212000 | 5.95656500  | -0.09473700 |
| C | 1.50452200  | 2.57430200  | -0.20695400 |
| C | 1.54712900  | 4.99468000  | -0.11700600 |
| C | 2.93808300  | 2.56364400  | -0.17623600 |
| C | 2.93093200  | 4.98842200  | -0.09029500 |
| H | 1.04478100  | 5.95227300  | -0.09349500 |
| C | 3.62922400  | 1.31997100  | -0.20483100 |
| C | 3.64408800  | 3.79166500  | -0.11539200 |
| H | 3.46396500  | 5.93590700  | -0.04639300 |
| C | 5.08378800  | 1.31895900  | -0.16741100 |
| C | 5.11635500  | 3.80135400  | -0.07796300 |
| C | 5.80243800  | 2.53432600  | -0.10491900 |
| C | 5.83952000  | 4.97467500  | -0.01707800 |
| C | 7.23870300  | 2.51417900  | -0.06802600 |
| H | 5.34316100  | 5.94255200  | 0.00397400  |
| C | 7.26615600  | 4.95189700  | 0.02012000  |
| C | 7.94792600  | 3.76996500  | -0.00389000 |
| C | 7.92142200  | 1.29953200  | -0.09455200 |
| H | 7.79433300  | 5.90360000  | 0.06821400  |
| C | 7.91142500  | -3.63461600 | -0.28707200 |
| C | 7.90927900  | -1.16432400 | -0.18847800 |
| C | 7.21791200  | -4.80814900 | -0.35193800 |
| C | 7.21465300  | -2.37070300 | -0.25351700 |
| C | 7.22471000  | 0.07167700  | -0.15850300 |
| C | 5.79105800  | -4.81416000 | -0.38727000 |
| H | 7.73673000  | -5.76583300 | -0.37830500 |
| C | 5.77817500  | -2.37401000 | -0.28902100 |
| C | 5.78400800  | 0.08020800  | -0.19456800 |
| C | 5.07945100  | -3.63259600 | -0.35703700 |
| H | 5.28524100  | -5.77589600 | -0.43917500 |
| C | 5.07168300  | -1.15034500 | -0.25873400 |
| C | 3.60727300  | -3.60562800 | -0.39082800 |
| C | 3.61736300  | -1.13429400 | -0.29321700 |
| C | 2.88202600  | -4.79351200 | -0.46030500 |
| C | 2.91343300  | -2.36955500 | -0.35821700 |
| C | 2.93183200  | 0.09710300  | -0.26891300 |
| C | 1.49803700  | -4.78362800 | -0.48115100 |
| H | 3.40569300  | -5.74647600 | -0.49906200 |
| C | 1.48002000  | -2.36311700 | -0.38899600 |
| C | 1.47838900  | 0.10530500  | -0.31032600 |
| C | 0.77417800  | -3.58730800 | -0.43226200 |

|   |             |             |             |
|---|-------------|-------------|-------------|
| H | 0.98558400  | -5.73412000 | -0.54488000 |
| C | 0.76712900  | -1.11678200 | -0.36954400 |
| C | -0.68763500 | -3.57843900 | -0.41651000 |
| C | -0.65883500 | -1.10838500 | -0.38370500 |
| C | -1.42589300 | -4.76601100 | -0.38009000 |
| C | -1.38315800 | -2.34581300 | -0.40787900 |
| C | -1.35569600 | 0.12024400  | -0.34708900 |
| C | -2.81102900 | -4.76991300 | -0.36356900 |
| H | -0.91512900 | -5.72216800 | -0.35506600 |
| C | -2.81618300 | -2.34306800 | -0.38637500 |
| C | -2.80777800 | 0.12721800  | -0.33278200 |
| C | -3.52174700 | -3.57207200 | -0.37472500 |
| H | -3.33620400 | -5.72103300 | -0.33937900 |
| C | -3.50773700 | -1.09873100 | -0.35304700 |
| C | -4.99362800 | -3.58019400 | -0.36654200 |
| C | -4.96415300 | -1.09789300 | -0.32926700 |
| C | -5.72419300 | -4.74971700 | -0.38413800 |
| C | -5.68399600 | -2.31219800 | -0.34267800 |
| C | -5.66436900 | 0.13948800  | -0.29293500 |
| C | -7.15332900 | -4.73547300 | -0.37643000 |
| H | -5.22341600 | -5.72167800 | -0.40509400 |
| C | -7.12123500 | -2.29894000 | -0.33152000 |
| C | -7.10135900 | 0.14591500  | -0.28027600 |
| C | -7.83429500 | -3.55372400 | -0.35061500 |
| H | -7.67967500 | -5.69079000 | -0.39185200 |
| C | -7.80277700 | -1.08281400 | -0.30249600 |
| H | 9.03490200  | 3.74237800  | 0.02412100  |
| H | 9.00796800  | 1.28666100  | -0.06678800 |
| H | 8.99589200  | -1.16421400 | -0.16106200 |
| H | 8.99865400  | -3.61988300 | -0.25977000 |
| H | -8.92421000 | -3.52857700 | -0.34399200 |
| H | -8.89486400 | -1.07114100 | -0.29545900 |
| H | -8.88328600 | 1.37915300  | -0.23842600 |
| H | -8.88985000 | 3.83606900  | -0.17483100 |
| H | -3.12475700 | -1.15371500 | 2.81053900  |
| C | -2.03894900 | -1.17519400 | 2.81981900  |
| C | -1.31861000 | 0.01691700  | 2.85332300  |
| C | -1.36624500 | -2.39447200 | 2.78277200  |
| C | 0.07465400  | -0.00945200 | 2.84626400  |
| H | -1.84347800 | 0.96851400  | 2.86258000  |
| C | 0.02701800  | -2.42206400 | 2.77464100  |
| H | -1.92825600 | -3.32351800 | 2.73682100  |
| C | 0.74665700  | -1.22942600 | 2.80873700  |
| H | 0.63830900  | 0.92001300  | 2.85527800  |
| H | 0.55431500  | -3.37139700 | 2.72655000  |
| H | 1.83428200  | -1.24981500 | 2.77886400  |

#### Graphene-U6N

|   |             |            |             |
|---|-------------|------------|-------------|
| C | -5.07770300 | 1.32098400 | -0.16980500 |
| C | -5.79565200 | 2.53873600 | -0.10747000 |

|   |             |             |             |
|---|-------------|-------------|-------------|
| C | -3.62425200 | 1.32141400  | -0.21418800 |
| C | -7.91482100 | 1.30263700  | -0.08083500 |
| C | -7.23165500 | 2.51744700  | -0.06372400 |
| C | -5.11035600 | 3.80416900  | -0.08804100 |
| C | -2.93227200 | 2.56688500  | -0.18946300 |
| C | -7.93928700 | 3.77385600  | -0.00235700 |
| C | -5.83126400 | 4.97989900  | -0.02987200 |
| C | -3.63749700 | 3.79353700  | -0.12862900 |
| C | -1.49894400 | 2.57791800  | -0.22148500 |
| C | -7.25662400 | 4.95603200  | 0.01285800  |
| H | -5.33476900 | 5.94653500  | -0.01550200 |
| C | -2.92321800 | 4.99114000  | -0.10402600 |
| C | -0.77310300 | 1.33640000  | -0.28923300 |
| C | -0.80505400 | 3.80797700  | -0.18666300 |
| H | -7.78532500 | 5.90740800  | 0.05820200  |
| C | -1.54048400 | 4.99802700  | -0.13127300 |
| H | -3.45771900 | 5.93808300  | -0.05914600 |
| C | 0.65147300  | 1.34172400  | -0.30340900 |
| C | 0.65810900  | 3.81186100  | -0.20012700 |
| H | -1.03780600 | 5.95530900  | -0.10585600 |
| C | 1.36479200  | 2.58883800  | -0.24850200 |
| C | 1.38820200  | 5.00714300  | -0.15842200 |
| C | 2.79855200  | 2.59822100  | -0.23862700 |
| C | 2.77076100  | 5.02286500  | -0.15489900 |
| H | 0.86872100  | 5.95812600  | -0.12477700 |
| C | 3.50191300  | 1.35566700  | -0.27353100 |
| C | 3.49226400  | 3.82982000  | -0.19090000 |
| H | 3.28750300  | 5.97783100  | -0.11959700 |
| C | 4.95628900  | 1.36746200  | -0.25012900 |
| C | 4.96384200  | 3.84925300  | -0.17612600 |
| C | 5.66584800  | 2.58906900  | -0.20278400 |
| C | 5.68545500  | 5.02487000  | -0.13475700 |
| C | 7.10271700  | 2.58833800  | -0.18040100 |
| H | 5.17421100  | 5.99279600  | -0.11496800 |
| C | 7.11373000  | 5.02396700  | -0.11533500 |
| C | 7.80517800  | 3.84744000  | -0.13630700 |
| C | 7.79494400  | 1.37665900  | -0.20020700 |
| H | 7.63198200  | 5.98367200  | -0.08249300 |
| C | 7.83723400  | -3.55690100 | -0.31959900 |
| C | 7.80582600  | -1.08638500 | -0.26115500 |
| C | 7.15576300  | -4.73852200 | -0.35972500 |
| C | 7.12425500  | -2.30263700 | -0.30356800 |
| C | 7.10501400  | 0.14292300  | -0.24459100 |
| C | 5.72739800  | -4.75021100 | -0.38535500 |
| H | 7.68181900  | -5.69444900 | -0.37210700 |
| C | 5.68700000  | -2.31440800 | -0.33037800 |
| C | 5.66729300  | 0.13722700  | -0.27108300 |
| C | 4.99585600  | -3.58013400 | -0.37147300 |
| H | 5.22443500  | -5.72224300 | -0.41630900 |
| C | 4.96664400  | -1.09864300 | -0.31782800 |

|   |             |             |             |
|---|-------------|-------------|-------------|
| C | 3.52450600  | -3.57187000 | -0.39623100 |
| C | 3.51228300  | -1.09932600 | -0.34524900 |
| C | 2.81386700  | -4.77236900 | -0.41604700 |
| C | 2.82012700  | -2.34590700 | -0.39650800 |
| C | 2.81383800  | 0.12634700  | -0.33043700 |
| C | 1.43145900  | -4.76773300 | -0.43757800 |
| H | 3.33896000  | -5.72338700 | -0.41052200 |
| C | 1.38715800  | -2.34805300 | -0.42418700 |
| C | 1.35921900  | 0.12043500  | -0.35391000 |
| C | 0.69173400  | -3.57739700 | -0.44525100 |
| H | 0.91985300  | -5.72362700 | -0.44180100 |
| C | 0.66189000  | -1.10701400 | -0.39612000 |
| C | -0.77090300 | -3.58723400 | -0.44623600 |
| C | -0.76193400 | -1.11530300 | -0.38768100 |
| C | -1.49532100 | -4.78565500 | -0.47276300 |
| C | -1.47622700 | -2.36436500 | -0.40279300 |
| C | -1.47302100 | 0.10678200  | -0.32484100 |
| C | -2.87797400 | -4.79374200 | -0.44305500 |
| H | -0.98373000 | -5.73732900 | -0.52221600 |
| C | -2.90966300 | -2.36939300 | -0.36217900 |
| C | -2.92837100 | 0.09905000  | -0.27955700 |
| C | -3.60346100 | -3.60391800 | -0.38202300 |
| H | -3.40397400 | -5.74629900 | -0.46604900 |
| C | -3.61340000 | -1.13196800 | -0.29656400 |
| C | -5.07601400 | -3.63117600 | -0.33883400 |
| C | -5.06635900 | -1.14804800 | -0.25231100 |
| C | -5.78596100 | -4.81486600 | -0.35941200 |
| C | -5.77295700 | -2.37377900 | -0.27181900 |
| C | -5.77789700 | 0.08262100  | -0.18816300 |
| C | -7.21139600 | -4.80699700 | -0.31439400 |
| H | -5.28072000 | -5.77552300 | -0.41155800 |
| C | -7.20925400 | -2.36865200 | -0.22675900 |
| C | -7.22069900 | 0.07434700  | -0.14316400 |
| C | -7.90507400 | -3.63294200 | -0.24975300 |
| H | -7.73131000 | -5.76410000 | -0.33329900 |
| C | -7.90347100 | -1.16190900 | -0.16270100 |
| H | 8.89572700  | 3.83215100  | -0.12014100 |
| H | 8.88819000  | 1.37513000  | -0.18058900 |
| H | 8.89899000  | -1.07595800 | -0.23923100 |
| H | 8.92757200  | -3.53330000 | -0.29829400 |
| H | -8.99152200 | -3.61820300 | -0.21525700 |
| H | -8.98888700 | -1.16201300 | -0.12855500 |
| H | -9.00022600 | 1.29058800  | -0.04735100 |
| H | -9.02559100 | 3.74675100  | 0.03034700  |
| C | 1.30691300  | -0.06363600 | 2.80867400  |
| C | -0.08521500 | -0.01257600 | 2.82359200  |
| C | -0.79059700 | -1.21098800 | 2.78857000  |
| C | -0.07400400 | -2.40272300 | 2.74414700  |
| C | 1.31735400  | -2.33854200 | 2.73494900  |
| N | 2.01090300  | -1.19757400 | 2.76401700  |

|   |             |             |            |
|---|-------------|-------------|------------|
| H | -1.87881100 | -1.21542600 | 2.76967400 |
| H | 1.88764500  | 0.85731300  | 2.81481600 |
| H | -0.59973200 | 0.94373000  | 2.84367300 |
| H | -0.58052500 | -3.36228900 | 2.69773400 |
| H | 1.90667100  | -3.25263300 | 2.68313600 |

Graphene-U6O

|   |             |             |             |
|---|-------------|-------------|-------------|
| C | -5.03302200 | 1.34599100  | -0.18038400 |
| C | -5.74638400 | 2.56463400  | -0.10374000 |
| C | -3.57909800 | 1.34165900  | -0.22130600 |
| C | -7.87024400 | 1.33721200  | -0.09853300 |
| C | -7.18252300 | 2.54889900  | -0.06189300 |
| C | -5.05567700 | 3.82789800  | -0.06795800 |
| C | -2.88270200 | 2.58328800  | -0.18691300 |
| C | -7.88593600 | 3.80689500  | 0.01745200  |
| C | -5.77308600 | 5.00438300  | 0.00692300  |
| C | -3.58328600 | 3.81281700  | -0.11274900 |
| C | -1.44942100 | 2.58934600  | -0.22591200 |
| C | -7.19908500 | 4.98598200  | 0.04997500  |
| H | -5.27296200 | 5.96948000  | 0.03444900  |
| C | -2.86472500 | 5.00688500  | -0.07806800 |
| C | -0.72884600 | 1.34687800  | -0.29462400 |
| C | -0.75115500 | 3.81781700  | -0.19067100 |
| H | -7.72374700 | 5.93889900  | 0.10930400  |
| C | -1.48156700 | 5.00889200  | -0.11412900 |
| H | -3.39451900 | 5.95545200  | -0.01769700 |
| C | 0.69645300  | 1.34721300  | -0.30853300 |
| C | 0.71143400  | 3.81758300  | -0.22297400 |
| H | -0.97516400 | 5.96370300  | -0.07486200 |
| C | 1.41395800  | 2.59014200  | -0.26259300 |
| C | 1.44575100  | 5.00968000  | -0.21058300 |
| C | 2.84786000  | 2.59438500  | -0.25508600 |
| C | 2.82957400  | 5.02020100  | -0.21238300 |
| H | 0.92998300  | 5.96339700  | -0.19867000 |
| C | 3.54619100  | 1.35047800  | -0.27226000 |
| C | 3.54672000  | 3.82517300  | -0.22671400 |
| H | 3.35000800  | 5.97390400  | -0.19875000 |
| C | 5.00138900  | 1.35636800  | -0.24151600 |
| C | 5.01846200  | 3.83917500  | -0.21060000 |
| C | 5.71515800  | 2.57488200  | -0.21181000 |
| C | 5.74424800  | 5.01212600  | -0.19020200 |
| C | 7.15210100  | 2.56818300  | -0.18283600 |
| H | 5.23808600  | 5.98223900  | -0.19120300 |
| C | 7.17292800  | 5.00490800  | -0.16596000 |
| C | 7.85939100  | 3.82573400  | -0.16059800 |
| C | 7.83919800  | 1.35420700  | -0.17642500 |
| H | 7.69489900  | 5.96284100  | -0.15084800 |
| C | 7.86040200  | -3.58144400 | -0.21395400 |
| C | 7.83965200  | -1.11007700 | -0.19400700 |
| C | 7.17449700  | -4.76039700 | -0.24745300 |



|   |             |             |             |
|---|-------------|-------------|-------------|
| C | 7.15302800  | -2.32363700 | -0.22502000 |
| C | 7.14416900  | 0.12222800  | -0.20307500 |
| C | 5.74633800  | -4.76727700 | -0.29553700 |
| H | 7.69640200  | -5.71843800 | -0.23893900 |
| C | 5.71630700  | -2.33007700 | -0.26945500 |
| C | 5.70725000  | 0.12220900  | -0.24028400 |
| C | 5.02050100  | -3.59426200 | -0.30750800 |
| H | 5.24075500  | -5.73729900 | -0.32345400 |
| C | 5.00179700  | -1.11179800 | -0.27643900 |
| C | 3.54974900  | -3.57983700 | -0.36116900 |
| C | 3.54667500  | -1.10634600 | -0.32057000 |
| C | 2.83393900  | -4.77546500 | -0.39515500 |
| C | 2.85023500  | -2.34892300 | -0.37432300 |
| C | 2.85293700  | 0.12280900  | -0.31870300 |
| C | 1.45060400  | -4.76498600 | -0.44776200 |
| H | 3.35444100  | -5.72909700 | -0.37691500 |
| C | 1.41795600  | -2.34455500 | -0.42823600 |
| C | 1.39995300  | 0.12224400  | -0.35241000 |
| C | 0.71727200  | -3.57298600 | -0.47167500 |
| H | 0.93474200  | -5.71876500 | -0.45639700 |
| C | 0.69873200  | -1.10251700 | -0.40674800 |
| C | -0.74437500 | -3.57581500 | -0.50351700 |
| C | -0.72599800 | -1.10564500 | -0.39493300 |
| C | -1.47294500 | -4.76824800 | -0.58199800 |
| C | -1.44482600 | -2.35039000 | -0.43969900 |
| C | -1.43274500 | 0.11959300  | -0.33373200 |
| C | -2.85637700 | -4.77138200 | -0.56295900 |
| H | -0.96495600 | -5.71958000 | -0.66401600 |
| C | -2.87851100 | -2.35024700 | -0.41541200 |
| C | -2.88748500 | 0.11732900  | -0.29658600 |
| C | -3.57725300 | -3.58157400 | -0.46928700 |
| H | -3.38518000 | -5.72068900 | -0.62139600 |
| C | -3.57724500 | -1.11145600 | -0.33344400 |
| C | -5.04972800 | -3.60300800 | -0.43242800 |
| C | -5.03092900 | -1.12204100 | -0.29912600 |
| C | -5.76537900 | -4.78216200 | -0.47687300 |
| C | -5.74240000 | -2.34339000 | -0.34429900 |
| C | -5.73799700 | 0.11050700  | -0.21869100 |
| C | -7.19145400 | -4.76997200 | -0.43634700 |
| H | -5.26377000 | -5.74443300 | -0.54412200 |
| C | -7.17875400 | -2.33387900 | -0.30439900 |
| C | -7.17977300 | 0.10728600  | -0.17862000 |
| C | -7.88022200 | -3.59450400 | -0.35267800 |
| H | -7.71478500 | -5.72472500 | -0.47407800 |
| C | -7.86833900 | -1.12561700 | -0.22128400 |
| H | 8.94952700  | 3.80584900  | -0.14000600 |
| H | 8.93169200  | 1.34792100  | -0.15083600 |
| H | 8.93196600  | -1.10377800 | -0.16199400 |
| H | 8.95015300  | -3.56173200 | -0.17806100 |
| H | -8.96697700 | -3.57583200 | -0.32129300 |

|   |             |             |             |
|---|-------------|-------------|-------------|
| H | -8.95431300 | -1.12178900 | -0.19017800 |
| H | -8.95621300 | 1.32859500  | -0.06700700 |
| H | -8.97261100 | 3.78337400  | 0.04955000  |
| C | 0.84042300  | -0.04787800 | 2.73996700  |
| C | -0.48212600 | -0.01195100 | 2.87562300  |
| C | -1.32767600 | -1.25682700 | 2.93072700  |
| C | -0.43923800 | -2.46028900 | 2.75845300  |
| C | 0.88167000  | -2.36544300 | 2.62885300  |
| H | -1.87465900 | -1.31156200 | 3.88425400  |
| H | 1.47353300  | 0.83060700  | 2.69545000  |
| H | -0.96102800 | 0.96070000  | 2.94303800  |
| H | -0.88415100 | -3.45060600 | 2.72966600  |
| H | 1.54532700  | -3.21260500 | 2.49873800  |
| O | 1.58915500  | -1.19125200 | 2.61983000  |
| H | -2.10792700 | -1.23289400 | 2.15227200  |

#### Graphene-U6S

|   |             |            |             |
|---|-------------|------------|-------------|
| C | -5.05948000 | 1.35338000 | -0.25639400 |
| C | -5.77684600 | 2.57240900 | -0.21578100 |
| C | -3.60598000 | 1.35273400 | -0.29628800 |
| C | -7.89628200 | 1.33725300 | -0.16847100 |
| C | -7.21292200 | 2.55216200 | -0.17525700 |
| C | -5.09094600 | 3.83771900 | -0.21596900 |
| C | -2.91297800 | 2.59829000 | -0.28018500 |
| C | -7.92030400 | 3.80973100 | -0.14183200 |
| C | -5.81169600 | 5.01452900 | -0.18442100 |
| C | -3.61770600 | 3.82587700 | -0.24427900 |
| C | -1.47951500 | 2.60738700 | -0.29491500 |
| C | -7.23726400 | 4.99179500 | -0.14814000 |
| H | -5.31497200 | 5.98113100 | -0.18621700 |
| C | -2.90246200 | 5.02337200 | -0.23479000 |
| C | -0.75447000 | 1.36512900 | -0.34918700 |
| C | -0.78468400 | 3.83678400 | -0.25824600 |
| H | -7.76587200 | 5.94402900 | -0.12476800 |
| C | -1.51942900 | 5.02845000 | -0.24181700 |
| H | -3.43669200 | 5.97134400 | -0.21785000 |
| C | 0.66950600  | 1.36859800 | -0.34921800 |
| C | 0.67812800  | 3.83812300 | -0.22968000 |
| H | -1.01540700 | 5.98542000 | -0.23555800 |
| C | 1.38376500  | 2.61425300 | -0.27711700 |
| C | 1.40848600  | 5.03062500 | -0.14223600 |
| C | 2.81711800  | 2.62078000 | -0.24084200 |
| C | 2.79085600  | 5.04336200 | -0.10929300 |
| H | 0.88954300  | 5.98113900 | -0.09016100 |
| C | 3.51935000  | 1.37794600 | -0.28856300 |
| C | 3.51144500  | 3.85020200 | -0.15792700 |
| H | 3.30785300  | 5.99633800 | -0.03990900 |
| C | 4.97382200  | 1.38718400 | -0.25486200 |
| C | 4.98273100  | 3.86643200 | -0.11766900 |
| C | 5.68376800  | 2.60621700 | -0.16920600 |

|   |             |             |             |
|---|-------------|-------------|-------------|
| C | 5.70500100  | 5.03909700  | -0.03219200 |
| C | 7.12049100  | 2.60290200  | -0.13264700 |
| H | 5.19472400  | 6.00688500  | 0.00854300  |
| C | 7.13306300  | 5.03548100  | 0.00640000  |
| C | 7.82356800  | 3.85935200  | -0.04200900 |
| C | 7.81175800  | 1.39186700  | -0.18510700 |
| H | 7.65169700  | 5.99308600  | 0.07535900  |
| C | 7.85138700  | -3.53438900 | -0.48635800 |
| C | 7.82112300  | -1.06785500 | -0.33259100 |
| C | 7.16945100  | -4.71302700 | -0.57532500 |
| C | 7.13901000  | -2.28123500 | -0.42330000 |
| C | 7.12124900  | 0.16067400  | -0.27484800 |
| C | 5.74108500  | -4.72297000 | -0.60565700 |
| H | 7.69508200  | -5.66806600 | -0.62390300 |
| C | 5.70184500  | -2.29123100 | -0.45423700 |
| C | 5.68379000  | 0.15717500  | -0.30787800 |
| C | 5.01001800  | -3.55406200 | -0.54757600 |
| H | 5.23775600  | -5.69274800 | -0.67616800 |
| C | 4.98263900  | -1.07625300 | -0.39550800 |
| C | 3.53846400  | -3.54462100 | -0.57241000 |
| C | 3.52793200  | -1.07531300 | -0.41934700 |
| C | 2.82663800  | -4.74100700 | -0.66463300 |
| C | 2.83507000  | -2.31978000 | -0.50828800 |
| C | 2.83075800  | 0.15092400  | -0.37210600 |
| C | 1.44388100  | -4.73562700 | -0.67342500 |
| H | 3.35103000  | -5.69021200 | -0.73013000 |
| C | 1.40173300  | -2.32048900 | -0.51788400 |
| C | 1.37619500  | 0.14622100  | -0.39786400 |
| C | 0.70512200  | -3.54811100 | -0.58387200 |
| H | 0.93198100  | -5.68818300 | -0.75212000 |
| C | 0.67813300  | -1.07979200 | -0.45810900 |
| C | -0.75640000 | -3.55838200 | -0.53960600 |
| C | -0.74504600 | -1.08677600 | -0.44896700 |
| C | -1.48003800 | -4.75719900 | -0.53002000 |
| C | -1.46072000 | -2.33563000 | -0.47797200 |
| C | -1.45524900 | 0.13625400  | -0.38974400 |
| C | -2.86188300 | -4.76534700 | -0.47043900 |
| H | -0.96764800 | -5.70934900 | -0.55919300 |
| C | -2.89325200 | -2.34044100 | -0.41966300 |
| C | -2.91062300 | 0.13017900  | -0.35082100 |
| C | -3.58716900 | -3.57468600 | -0.41591800 |
| H | -3.38765700 | -5.71826600 | -0.46328500 |
| C | -3.59623200 | -1.10145500 | -0.35627700 |
| C | -5.05899300 | -3.60107100 | -0.35158300 |
| C | -5.04872400 | -1.11670300 | -0.30345000 |
| C | -5.76882600 | -4.78496500 | -0.34246200 |
| C | -5.75530800 | -2.34266100 | -0.29875000 |
| C | -5.75981000 | 0.11503300  | -0.25513600 |
| C | -7.19372500 | -4.77612900 | -0.28312800 |
| H | -5.26406900 | -5.74641500 | -0.38251400 |

|   |             |             |             |
|---|-------------|-------------|-------------|
| C | -7.19128600 | -2.33647200 | -0.24331000 |
| C | -7.20257600 | 0.10781900  | -0.20679100 |
| C | -7.88700000 | -3.60102000 | -0.23545400 |
| H | -7.71363800 | -5.73342000 | -0.27799400 |
| C | -7.88520400 | -1.12868500 | -0.19890000 |
| H | 8.91383200  | 3.84209700  | -0.01331500 |
| H | 8.90481000  | 1.38845800  | -0.15703300 |
| H | 8.91419700  | -1.05918900 | -0.30575900 |
| H | 8.94166700  | -3.51231200 | -0.46091100 |
| H | -8.97310900 | -3.58562200 | -0.19169200 |
| H | -8.97042800 | -1.12812600 | -0.15931600 |
| H | -8.98170600 | 1.32613700  | -0.13513700 |
| H | -9.00674400 | 3.78361200  | -0.11282800 |
| C | 0.71076200  | 0.13614600  | 2.80109900  |
| C | -0.61931800 | 0.06589100  | 2.77008600  |
| C | -1.44083600 | -1.19101100 | 2.86656700  |
| C | -0.64971100 | -2.45155800 | 2.64795700  |
| C | 0.67884000  | -2.55546400 | 2.66944000  |
| H | -1.94580100 | -1.23273400 | 3.84585500  |
| H | 1.22796400  | 1.08759100  | 2.72077500  |
| H | -1.17020500 | 0.99873700  | 2.65508700  |
| H | -1.22273700 | -3.35461400 | 2.44062100  |
| H | 1.17317200  | -3.50665600 | 2.49735700  |
| H | -2.26049200 | -1.14623300 | 2.13194600  |
| S | 1.81746000  | -1.23248600 | 2.91848800  |

#### Graphene-CH<sub>4</sub>

|   |             |             |             |
|---|-------------|-------------|-------------|
| C | 5.00289600  | -1.20116600 | -0.07891500 |
| C | 5.71752000  | -2.41993100 | -0.07283800 |
| C | 3.54772900  | -1.19591000 | -0.08829500 |
| C | 7.84142000  | -1.19414500 | -0.06573800 |
| C | 7.15436200  | -2.40655000 | -0.06562700 |
| C | 5.02639300  | -3.68515000 | -0.07432200 |
| C | 2.85198700  | -2.43695200 | -0.09576300 |
| C | 7.85976200  | -3.66621100 | -0.05884400 |
| C | 5.74626100  | -4.86180300 | -0.06828700 |
| C | 3.55389000  | -3.66920500 | -0.08365900 |
| C | 1.41842000  | -2.44108400 | -0.11158200 |
| C | 7.17377500  | -4.84576900 | -0.06010800 |
| H | 5.24632000  | -5.82844900 | -0.06985000 |
| C | 2.83635600  | -4.86311200 | -0.07446600 |
| C | 0.69780600  | -1.19957700 | -0.11344500 |
| C | 0.72026500  | -3.67141500 | -0.10724300 |
| H | 7.69854400  | -5.80061600 | -0.05514900 |
| C | 1.45192500  | -4.86293700 | -0.08204900 |
| H | 3.36547000  | -5.81350800 | -0.05710700 |
| C | -0.72956900 | -1.20077300 | -0.10077700 |
| C | -0.74246600 | -3.67183200 | -0.12139500 |
| H | 0.94536600  | -5.81851700 | -0.06260500 |
| C | -1.44628400 | -2.44328100 | -0.10658800 |

|   |             |             |             |
|---|-------------|-------------|-------------|
| C | -1.47509500 | -4.86341200 | -0.15087700 |
| C | -2.88019700 | -2.44835600 | -0.10276600 |
| C | -2.85976800 | -4.87435400 | -0.15000400 |
| H | -0.95980100 | -5.81674700 | -0.17938800 |
| C | -3.57964700 | -1.20790300 | -0.08098700 |
| C | -3.57828500 | -3.68155300 | -0.12196300 |
| H | -3.37981600 | -5.82833600 | -0.17251300 |
| C | -5.03579700 | -1.21578400 | -0.07321400 |
| C | -5.04999100 | -3.69843300 | -0.11588600 |
| C | -5.74798400 | -2.43453700 | -0.09000700 |
| C | -5.77329400 | -4.87247000 | -0.13296400 |
| C | -7.18522300 | -2.42966300 | -0.08158000 |
| H | -5.26697700 | -5.84128000 | -0.15266700 |
| C | -7.20243900 | -4.86647000 | -0.12542900 |
| C | -7.89054000 | -3.68882500 | -0.10036500 |
| C | -7.87426400 | -1.21769800 | -0.05549300 |
| H | -7.72308900 | -5.82481000 | -0.14000500 |
| C | -7.90160400 | 3.71748900  | 0.03202100  |
| C | -7.87794800 | 1.24641100  | -0.01133400 |
| C | -7.21706100 | 4.89737900  | 0.04607100  |
| C | -7.19252700 | 2.46060400  | 0.00420900  |
| C | -7.18062800 | 0.01548500  | -0.03814400 |
| C | -5.78798400 | 4.90802000  | 0.03287700  |
| H | -7.74055100 | 5.85404400  | 0.06736800  |
| C | -5.75533300 | 2.47011000  | -0.00772000 |
| C | -5.74361600 | 0.01780800  | -0.04807300 |
| C | -5.06120500 | 3.73632100  | 0.00637100  |
| H | -5.28458500 | 5.87847500  | 0.04435700  |
| C | -5.03945800 | 1.25365400  | -0.03299100 |
| C | -3.58952800 | 3.72421200  | -0.00889200 |
| C | -3.58328600 | 1.25041100  | -0.04454800 |
| C | -2.87470000 | 4.91939900  | 0.00133300  |
| C | -2.88761700 | 2.49323600  | -0.03347400 |
| C | -2.88740300 | 0.02236300  | -0.06726300 |
| C | -1.49003100 | 4.91293400  | -0.01371000 |
| H | -3.39757400 | 5.87187700  | 0.02213600  |
| C | -1.45389400 | 2.49299700  | -0.04818900 |
| C | -1.43505300 | 0.02460200  | -0.07914300 |
| C | -0.75370000 | 3.72364800  | -0.04021900 |
| H | -0.97797200 | 5.86834800  | -0.00262900 |
| C | -0.73354300 | 1.25251400  | -0.06982600 |
| C | 0.70905100  | 3.72785900  | -0.05753500 |
| C | 0.69423400  | 1.25577300  | -0.08151600 |
| C | 1.43746500  | 4.92142100  | -0.05957400 |
| C | 1.41116300  | 2.49963500  | -0.07219400 |
| C | 1.40112400  | 0.02921300  | -0.10025000 |
| C | 2.82201500  | 4.92567500  | -0.06924700 |
| H | 0.92853500  | 5.87588200  | -0.05397400 |
| C | 2.84487700  | 2.49952900  | -0.07971900 |
| C | 2.85437200  | 0.03166100  | -0.09270500 |

|   |             |             |             |
|---|-------------|-------------|-------------|
| C | 3.54311300  | 3.73397400  | -0.07733700 |
| H | 3.34831200  | 5.87779300  | -0.06945600 |
| C | 3.54411100  | 1.26079300  | -0.08568600 |
| C | 5.01560100  | 3.75424800  | -0.08196700 |
| C | 4.99938500  | 1.27018400  | -0.08140500 |
| C | 5.73207800  | 4.93295800  | -0.08532100 |
| C | 5.71043700  | 2.49103800  | -0.08067100 |
| C | 5.70762500  | 0.03556000  | -0.07747000 |
| C | 7.15968100  | 4.92108000  | -0.08557600 |
| H | 5.22933000  | 5.89815600  | -0.08739100 |
| C | 7.14730200  | 2.48182400  | -0.07856800 |
| C | 7.14815100  | 0.03762100  | -0.07212800 |
| C | 7.84908100  | 3.74352900  | -0.08161300 |
| H | 7.68168900  | 5.87744300  | -0.08851100 |
| C | 7.83785600  | 1.27140000  | -0.07370800 |
| H | -8.98046700 | -3.67015300 | -0.09402600 |
| H | -8.96613600 | -1.21268600 | -0.04835100 |
| H | -8.96978300 | 1.23788300  | -0.00287500 |
| H | -8.99143300 | 3.69527300  | 0.04144700  |
| H | 8.93675100  | 3.72385100  | -0.08083800 |
| H | 8.92513100  | 1.26629900  | -0.07116800 |
| H | 8.92865600  | -1.18590200 | -0.06095300 |
| H | 8.94734600  | -3.64338400 | -0.05286900 |
| C | 0.84117600  | -1.22111600 | 3.14708800  |
| H | 0.27366600  | -0.35060000 | 2.81189200  |
| H | 0.35816000  | -2.13307700 | 2.79051500  |
| H | 1.85564900  | -1.16871000 | 2.74210800  |
| H | 0.88704000  | -1.23172500 | 4.23783900  |

#### Graphene-NH<sub>3</sub>

|   |             |            |             |
|---|-------------|------------|-------------|
| C | -5.01601500 | 1.24020900 | -0.07150900 |
| C | -5.72850600 | 2.46041800 | -0.07125200 |
| C | -3.56088000 | 1.23268700 | -0.07591700 |
| C | -7.85429600 | 1.23741700 | -0.06456100 |
| C | -7.16546800 | 2.44861800 | -0.06858700 |
| C | -5.03603800 | 3.72444800 | -0.07367700 |
| C | -2.86342400 | 2.47267400 | -0.07633300 |
| C | -7.86856400 | 3.70968000 | -0.07018500 |
| C | -5.75323700 | 4.90269000 | -0.07527800 |
| C | -3.56331400 | 3.70591100 | -0.07375700 |
| C | -1.42954500 | 2.47561000 | -0.07661400 |
| C | -7.18068300 | 4.88811500 | -0.07364800 |
| H | -5.25232700 | 5.86827800 | -0.07738800 |
| C | -2.84358900 | 4.89856600 | -0.07031700 |
| C | -0.71084300 | 1.23235500 | -0.08437300 |
| C | -0.72921000 | 3.70465700 | -0.07145300 |
| H | -7.70421300 | 5.84360000 | -0.07494500 |
| C | -1.45905600 | 4.89720400 | -0.06859400 |
| H | -3.37189600 | 5.84957700 | -0.06804100 |
| C | 0.71688700  | 1.23059300 | -0.07850500 |

|   |             |             |             |
|---|-------------|-------------|-------------|
| C | 0.73404100  | 3.70207800  | -0.06721300 |
| H | -0.95221600 | 5.85248200  | -0.06447600 |
| C | 1.43597700  | 2.47414500  | -0.07018300 |
| C | 1.46926600  | 4.89359600  | -0.05893700 |
| C | 2.86973600  | 2.47656300  | -0.06435800 |
| C | 2.85290000  | 4.90267700  | -0.05328700 |
| H | 0.95491500  | 5.84785500  | -0.05618100 |
| C | 3.56744400  | 1.23324900  | -0.06683700 |
| C | 3.56947000  | 3.70745300  | -0.05532100 |
| H | 3.37393900  | 5.85598100  | -0.04595800 |
| C | 5.02259400  | 1.23831400  | -0.06053400 |
| C | 5.04099200  | 3.72111300  | -0.04800500 |
| C | 5.73726300  | 2.45688600  | -0.05096600 |
| C | 5.76716500  | 4.89421800  | -0.03738800 |
| C | 7.17447700  | 2.44991500  | -0.04352700 |
| H | 5.26116900  | 5.86438900  | -0.03390600 |
| C | 7.19586900  | 4.88669900  | -0.02993900 |
| C | 7.88218300  | 3.70734000  | -0.03290100 |
| C | 7.86141700  | 1.23590100  | -0.04578700 |
| H | 7.71826600  | 5.84453100  | -0.02131600 |
| C | 7.88191000  | -3.69973000 | -0.06650200 |
| C | 7.86132400  | -1.22825000 | -0.05700800 |
| C | 7.19549500  | -4.87902200 | -0.07338300 |
| C | 7.17431100  | -2.44220700 | -0.06530000 |
| C | 7.16586600  | 0.00386900  | -0.05538000 |
| C | 5.76678700  | -4.88636300 | -0.07924300 |
| H | 7.71782300  | -5.83693200 | -0.07385400 |
| C | 5.73710000  | -2.44901200 | -0.07175500 |
| C | 5.72838300  | 0.00396100  | -0.06246200 |
| C | 5.04070400  | -3.71314500 | -0.07876700 |
| H | 5.26071000  | -5.85649500 | -0.08354700 |
| C | 5.02254900  | -1.23033700 | -0.07066800 |
| C | 3.56917500  | -3.69929800 | -0.08333700 |
| C | 3.56743100  | -1.22511700 | -0.07589500 |
| C | 2.85249100  | -4.89448400 | -0.09028600 |
| C | 2.86962800  | -2.46830400 | -0.08138900 |
| C | 2.87384100  | 0.00407700  | -0.07486900 |
| C | 1.46887600  | -4.88530900 | -0.09082200 |
| H | 3.37349200  | -5.84782500 | -0.09429700 |
| C | 1.43574500  | -2.46565000 | -0.08396100 |
| C | 1.42013900  | 0.00410700  | -0.08207700 |
| C | 0.73376800  | -3.69367600 | -0.08422800 |
| H | 0.95438300  | -5.83947100 | -0.09746900 |
| C | 0.71674300  | -1.22216300 | -0.08594600 |
| C | -0.72948500 | -3.69612100 | -0.07714300 |
| C | -0.71093400 | -1.22373200 | -0.09094800 |
| C | -1.45932400 | -4.88854100 | -0.06288200 |
| C | -1.42970900 | -2.46682700 | -0.08089900 |
| C | -1.41616200 | 0.00428400  | -0.08516800 |
| C | -2.84390500 | -4.88976600 | -0.05838300 |

|   |             |             |             |
|---|-------------|-------------|-------------|
| H | -0.95249200 | -5.84378100 | -0.05300400 |
| C | -2.86369500 | -2.46383600 | -0.07398200 |
| C | -2.87022200 | 0.00440000  | -0.07942900 |
| C | -3.56358100 | -3.69714400 | -0.06487400 |
| H | -3.37222700 | -5.84071700 | -0.04816600 |
| C | -3.56104300 | -1.22394400 | -0.07368700 |
| C | -5.03629600 | -3.71559800 | -0.06002000 |
| C | -5.01615400 | -1.23136700 | -0.06731900 |
| C | -5.75354200 | -4.89379300 | -0.05454100 |
| C | -5.72868000 | -2.45152600 | -0.06145600 |
| C | -5.72231700 | 0.00445500  | -0.06740700 |
| C | -7.18100100 | -4.87912300 | -0.04995100 |
| H | -5.25271200 | -5.85942500 | -0.05338900 |
| C | -7.16564800 | -2.43961000 | -0.05688100 |
| C | -7.16360100 | 0.00451700  | -0.06330300 |
| C | -7.86880300 | -3.70065200 | -0.05108500 |
| H | -7.70457100 | -5.83457800 | -0.04543700 |
| C | -7.85437500 | -1.22838500 | -0.05816400 |
| H | 8.97251000  | 3.68733000  | -0.02681700 |
| H | 8.95417600  | 1.22943900  | -0.03953100 |
| H | 8.95409100  | -1.22191300 | -0.05110800 |
| H | 8.97225100  | -3.67987000 | -0.06126500 |
| H | -8.95625100 | -3.67929100 | -0.04748600 |
| H | -8.94126200 | -1.22168800 | -0.05489000 |
| H | -8.94118100 | 1.23083700  | -0.06207700 |
| H | -8.95601100 | 3.68839700  | -0.06842100 |
| N | -0.13407400 | -0.19048200 | 3.18000700  |
| H | -1.15087600 | -0.13460800 | 3.15263100  |
| H | 0.10786900  | -1.03645000 | 2.66791900  |
| H | 0.19832500  | 0.58189000  | 2.60564200  |

#### Graphene-CO<sub>2</sub>

|   |             |            |             |
|---|-------------|------------|-------------|
| C | -5.02122200 | 1.29653300 | -0.12290700 |
| C | -5.73418400 | 2.51574500 | -0.10495400 |
| C | -3.56579000 | 1.28951300 | -0.12352900 |
| C | -7.85965400 | 1.29317300 | -0.12281200 |
| C | -7.17109200 | 2.50454500 | -0.10552100 |
| C | -5.04108500 | 3.78014100 | -0.08551600 |
| C | -2.86834700 | 2.52867600 | -0.10229600 |
| C | -7.87494700 | 3.76504200 | -0.08753000 |
| C | -5.75961400 | 4.95729700 | -0.06846900 |
| C | -3.56861600 | 3.76209200 | -0.08377500 |
| C | -1.43448800 | 2.53080100 | -0.09901500 |
| C | -7.18738500 | 4.94342400 | -0.06974500 |
| H | -5.25838500 | 5.92333900 | -0.05338600 |
| C | -2.84951500 | 4.95456500 | -0.06480100 |
| C | -0.71549700 | 1.28938300 | -0.12235500 |
| C | -0.73432700 | 3.76038400 | -0.07497400 |
| H | -7.71069700 | 5.89901800 | -0.05594600 |
| C | -1.46471800 | 4.95232700 | -0.06108400 |



|   |             |             |             |
|---|-------------|-------------|-------------|
| H | -3.37702100 | 5.90589100  | -0.05237700 |
| C | 0.71232800  | 1.28827400  | -0.12193600 |
| C | 0.72837700  | 3.75864800  | -0.06706800 |
| H | -0.95736300 | 5.90758200  | -0.04734000 |
| C | 1.43062600  | 2.52925400  | -0.09282800 |
| C | 1.46255300  | 4.94880300  | -0.03362900 |
| C | 2.86442300  | 2.53214300  | -0.08995000 |
| C | 2.84745500  | 4.95774600  | -0.03028800 |
| H | 0.94909600  | 5.90311300  | -0.00773100 |
| C | 3.56226000  | 1.29135700  | -0.11697100 |
| C | 3.56438900  | 3.76437300  | -0.05913000 |
| H | 3.36868600  | 5.91100100  | -0.00366100 |
| C | 5.01850800  | 1.29687400  | -0.11493100 |
| C | 5.03613500  | 3.77918600  | -0.05692500 |
| C | 5.73239100  | 2.51430900  | -0.08638900 |
| C | 5.76095500  | 4.95196700  | -0.02802200 |
| C | 7.16964400  | 2.50724500  | -0.08590600 |
| H | 5.25611900  | 5.92135400  | -0.00488800 |
| C | 7.19016500  | 4.94371200  | -0.02721700 |
| C | 7.87667900  | 3.76527400  | -0.05540300 |
| C | 7.85696100  | 1.29443700  | -0.11434300 |
| H | 7.71209400  | 5.90114800  | -0.00359500 |
| C | 7.87759200  | -3.64029400 | -0.22187200 |
| C | 7.85713100  | -1.16941500 | -0.16998700 |
| C | 7.19156000  | -4.81916800 | -0.24325200 |
| C | 7.17009100  | -2.38248100 | -0.19400900 |
| C | 7.16151000  | 0.06246600  | -0.14223600 |
| C | 5.76239900  | -4.82795400 | -0.23758300 |
| H | 7.71384400  | -5.77647000 | -0.26474900 |
| C | 5.73282800  | -2.38999200 | -0.19084700 |
| C | 5.72449100  | 0.06223100  | -0.14181100 |
| C | 5.03717900  | -3.65532000 | -0.21172100 |
| H | 5.25779200  | -5.79764700 | -0.25427200 |
| C | 5.01858500  | -1.17258800 | -0.16707600 |
| C | 3.56551700  | -3.64124200 | -0.20442800 |
| C | 3.56237300  | -1.16717500 | -0.16821600 |
| C | 2.84878400  | -4.83492700 | -0.21457400 |
| C | 2.86517600  | -2.40891800 | -0.18651300 |
| C | 2.86834800  | 0.06213100  | -0.14445200 |
| C | 1.46388500  | -4.82642500 | -0.20706400 |
| H | 3.37024900  | -5.78829900 | -0.22763100 |
| C | 1.43148700  | -2.40717900 | -0.18503600 |
| C | 1.41624300  | 0.06255500  | -0.14787600 |
| C | 0.72928700  | -3.63638100 | -0.19199500 |
| H | 0.95068000  | -5.78111100 | -0.21468700 |
| C | 0.71327300  | -1.16506700 | -0.17167700 |
| C | -0.73330700 | -3.63849800 | -0.18442300 |
| C | -0.71622200 | -1.16618900 | -0.17456500 |
| C | -1.46338000 | -4.83005600 | -0.18383000 |
| C | -1.43420200 | -2.40891800 | -0.17792900 |

|   |             |             |             |
|---|-------------|-------------|-------------|
| C | -1.42121000 | 0.06178800  | -0.14724300 |
| C | -2.84842700 | -4.83267100 | -0.18341000 |
| H | -0.95587300 | -5.78525800 | -0.18233200 |
| C | -2.86800600 | -2.40672500 | -0.17369900 |
| C | -2.87410900 | 0.06144000  | -0.14420200 |
| C | -3.56800400 | -3.64066600 | -0.18039000 |
| H | -3.37545700 | -5.78430500 | -0.18481900 |
| C | -3.56528400 | -1.16732000 | -0.15968000 |
| C | -5.04041300 | -3.65878400 | -0.18231200 |
| C | -5.02087900 | -1.17483600 | -0.15633300 |
| C | -5.75877000 | -4.83602800 | -0.19653600 |
| C | -5.73353800 | -2.39427700 | -0.16941200 |
| C | -5.72748000 | 0.06070900  | -0.13987000 |
| C | -7.18658300 | -4.82236200 | -0.19822000 |
| H | -5.25737800 | -5.80209400 | -0.20681900 |
| C | -7.17047400 | -2.38335200 | -0.16983600 |
| C | -7.16768300 | 0.06065900  | -0.13951600 |
| C | -7.87420900 | -3.64399500 | -0.18526500 |
| H | -7.70974700 | -5.77806400 | -0.21008700 |
| C | -7.85930100 | -1.17214900 | -0.15545600 |
| H | 8.96652800  | 3.74493200  | -0.05535200 |
| H | 8.94874300  | 1.28770300  | -0.11479500 |
| H | 8.94895900  | -1.16239800 | -0.17206700 |
| H | 8.96744600  | -3.61947600 | -0.22531500 |
| H | -8.96192100 | -3.62270700 | -0.18625200 |
| H | -8.94674200 | -1.16545400 | -0.15609800 |
| H | -8.94705000 | 1.28627400  | -0.12326000 |
| H | -8.96263900 | 3.74369900  | -0.08847100 |
| C | 0.01670000  | -1.27216400 | 2.81705600  |
| O | 0.00713700  | -0.10926600 | 2.84374700  |
| O | 0.03437300  | -2.43548600 | 2.79888500  |

#### Graphene-H<sub>2</sub>O

|   |            |             |             |
|---|------------|-------------|-------------|
| C | 5.02463400 | -1.23327400 | -0.05807200 |
| C | 5.73946800 | -2.45203200 | -0.05966700 |
| C | 3.56947900 | -1.22788000 | -0.06327600 |
| C | 7.86370900 | -1.23146400 | -0.04108700 |
| C | 7.17674800 | -2.44556400 | -0.05104700 |
| C | 5.04300200 | -3.71583800 | -0.07010800 |
| C | 2.87207000 | -2.47190500 | -0.07250900 |
| C | 7.88452200 | -3.70288700 | -0.05226200 |
| C | 5.76942400 | -4.88895400 | -0.07061300 |
| C | 3.57134300 | -3.70215800 | -0.07787600 |
| C | 1.43822800 | -2.46851300 | -0.07600200 |
| C | 7.19809400 | -4.88220600 | -0.06182400 |
| H | 5.26271300 | -5.85922000 | -0.07740400 |
| C | 2.85543400 | -4.89816600 | -0.09305900 |
| C | 0.72001200 | -1.22475000 | -0.07844200 |
| C | 0.73723400 | -3.69645300 | -0.07998400 |
| H | 7.72032300 | -5.84027900 | -0.06248300 |

|   |             |             |             |
|---|-------------|-------------|-------------|
| C | 1.47221900  | -4.88849100 | -0.09486700 |
| H | 3.37638400  | -5.85142200 | -0.10325100 |
| C | -0.70563300 | -1.22698700 | -0.08783900 |
| C | -0.72587900 | -3.70026800 | -0.06814200 |
| H | 0.95727200  | -5.84234100 | -0.11061900 |
| C | -1.42613900 | -2.47182800 | -0.07591000 |
| C | -1.45591700 | -4.89351000 | -0.04492200 |
| C | -2.86050100 | -2.46858400 | -0.07048400 |
| C | -2.83988200 | -4.89418000 | -0.04048700 |
| H | -0.94874400 | -5.84858200 | -0.02658300 |
| C | -3.55825100 | -1.22755700 | -0.07451300 |
| C | -3.56012300 | -3.70100000 | -0.05515300 |
| H | -3.36925900 | -5.84472800 | -0.02346800 |
| C | -5.01276100 | -1.23509600 | -0.06458600 |
| C | -5.03322800 | -3.71963900 | -0.05028500 |
| C | -5.72508500 | -2.45648200 | -0.05381000 |
| C | -5.74950400 | -4.89896600 | -0.04197000 |
| C | -7.16202300 | -2.44375700 | -0.04679600 |
| H | -5.24861000 | -5.86384800 | -0.04023700 |
| C | -7.17627400 | -4.88349100 | -0.03593200 |
| C | -7.86450000 | -3.70488800 | -0.03787800 |
| C | -7.85092000 | -1.23246800 | -0.04848000 |
| H | -7.70032300 | -5.83857500 | -0.02969100 |
| C | -7.86461000 | 3.70593600  | -0.06447200 |
| C | -7.85096800 | 1.23347300  | -0.05735100 |
| C | -7.17636300 | 4.88454800  | -0.06982700 |
| C | -7.16210200 | 2.44484300  | -0.06366500 |
| C | -7.16136300 | 0.00055000  | -0.05685900 |
| C | -5.74962000 | 4.90002400  | -0.07370700 |
| H | -7.70044500 | 5.83963800  | -0.07103700 |
| C | -5.72518200 | 2.45754100  | -0.06924200 |
| C | -5.71882400 | 0.00051400  | -0.06453200 |
| C | -5.03329000 | 3.72068500  | -0.07286100 |
| H | -5.24870800 | 5.86489300  | -0.07750000 |
| C | -5.01278700 | 1.23614300  | -0.07164600 |
| C | -3.56016900 | 3.70204000  | -0.07409000 |
| C | -3.55829900 | 1.22863600  | -0.07974600 |
| C | -2.84000100 | 4.89538600  | -0.06673000 |
| C | -2.86037600 | 2.46977700  | -0.07997500 |
| C | -2.86748900 | 0.00061000  | -0.08505200 |
| C | -1.45612300 | 4.89468400  | -0.06545800 |
| H | -3.36947200 | 5.84601500  | -0.06045300 |
| C | -1.42606900 | 2.47296100  | -0.08017900 |
| C | -1.41219200 | 0.00070700  | -0.09000300 |
| C | -0.72591000 | 3.70130300  | -0.07367600 |
| H | -0.94915600 | 5.84997900  | -0.05615100 |
| C | -0.70541600 | 1.22834000  | -0.08700200 |
| C | 0.73719500  | 3.69752800  | -0.07283600 |
| C | 0.71998400  | 1.22608500  | -0.07725200 |
| C | 1.47222300  | 4.88956700  | -0.07285100 |

|   |             |             |             |
|---|-------------|-------------|-------------|
| C | 1.43819500  | 2.46964800  | -0.06992100 |
| C | 1.42176600  | 0.00084200  | -0.07136800 |
| C | 2.85544900  | 4.89932700  | -0.06496000 |
| H | 0.95746700  | 5.84361000  | -0.07958100 |
| C | 2.87198100  | 2.47308200  | -0.06129900 |
| C | 2.87558300  | 0.00066500  | -0.06388900 |
| C | 3.57133200  | 3.70333300  | -0.05681700 |
| H | 3.37631700  | 5.85268300  | -0.06407100 |
| C | 3.56950000  | 1.22923900  | -0.05678500 |
| C | 5.04298200  | 3.71700000  | -0.04519300 |
| C | 5.02466900  | 1.23447000  | -0.05010800 |
| C | 5.76937900  | 4.89007100  | -0.03549500 |
| C | 5.73950300  | 2.45316700  | -0.04264000 |
| C | 5.73053700  | 0.00056900  | -0.04941600 |
| C | 7.19807400  | 4.88327900  | -0.02438000 |
| H | 5.26265400  | 5.86035700  | -0.03577000 |
| C | 7.17682300  | 2.44662600  | -0.03250700 |
| C | 7.16817200  | 0.00052500  | -0.04071900 |
| C | 7.88455600  | 3.70398600  | -0.02306600 |
| H | 7.72022900  | 5.84136500  | -0.01666500 |
| C | 7.86375300  | 1.23255600  | -0.03138500 |
| H | -8.95163100 | -3.68369300 | -0.03312200 |
| H | -8.93725800 | -1.22613100 | -0.04349100 |
| H | -8.93730100 | 1.22718700  | -0.05291200 |
| H | -8.95173300 | 3.68478200  | -0.06102700 |
| H | 8.97502200  | 3.68427600  | -0.01452000 |
| H | 8.95686600  | 1.22626300  | -0.02313400 |
| H | 8.95683500  | -1.22528600 | -0.03342000 |
| H | 8.97500900  | -3.68321300 | -0.04507400 |
| O | -0.20618600 | -0.01305400 | 2.86552800  |
| H | -0.65475000 | -0.83146000 | 2.61229600  |
| H | -0.84123800 | 0.67598900  | 2.62617200  |

#### Graphene-H<sub>2</sub>

|   |             |            |             |
|---|-------------|------------|-------------|
| C | -5.01947600 | 1.23514800 | -0.01358500 |
| C | -5.73348400 | 2.45279400 | -0.01295000 |
| C | -3.56315400 | 1.22950300 | -0.01444500 |
| C | -7.85801600 | 1.23240500 | -0.01262600 |
| C | -7.17074100 | 2.44554000 | -0.01264900 |
| C | -5.03754600 | 3.71818300 | -0.01261900 |
| C | -2.86567600 | 2.47101000 | -0.01384300 |
| C | -7.87789500 | 3.70388900 | -0.01240400 |
| C | -5.76239900 | 4.89128000 | -0.01245400 |
| C | -3.56580800 | 3.70347500 | -0.01251300 |
| C | -1.43187300 | 2.46855500 | -0.01425200 |
| C | -7.19159600 | 4.88278500 | -0.01237900 |
| H | -5.25776600 | 5.86095400 | -0.01234800 |
| C | -2.84909100 | 4.89743500 | -0.01093500 |
| C | -0.71355200 | 1.22714300 | -0.01660400 |
| C | -0.72976200 | 3.69835900 | -0.01259100 |

|   |             |             |             |
|---|-------------|-------------|-------------|
| H | -7.71368900 | 5.84038400  | -0.01227400 |
| C | -1.46422600 | 4.88887100  | -0.01081500 |
| H | -3.37076800 | 5.85084300  | -0.00962000 |
| C | 0.71454600  | 1.22822300  | -0.01651400 |
| C | 0.73301500  | 3.70011200  | -0.01274700 |
| H | -0.95099000 | 5.84363500  | -0.00925700 |
| C | 1.43340400  | 2.47053300  | -0.01427400 |
| C | 1.46350200  | 4.89227300  | -0.01141700 |
| C | 2.86722600  | 2.46819500  | -0.01400300 |
| C | 2.84821000  | 4.89447200  | -0.01157700 |
| H | 0.95602800  | 5.84760100  | -0.01023000 |
| C | 3.56459800  | 1.22856200  | -0.01457100 |
| C | 3.56737800  | 3.70175000  | -0.01286200 |
| H | 3.37576400  | 5.84585700  | -0.01055500 |
| C | 5.02003000  | 1.23586900  | -0.01366300 |
| C | 5.03981600  | 3.71983000  | -0.01288000 |
| C | 5.73293800  | 2.45539100  | -0.01306500 |
| C | 5.75828500  | 4.89722000  | -0.01269100 |
| C | 7.16982500  | 2.44432800  | -0.01262700 |
| H | 5.25689700  | 5.86333400  | -0.01267200 |
| C | 7.18600700  | 4.88350800  | -0.01247600 |
| C | 7.87359500  | 3.70496800  | -0.01238400 |
| C | 7.85856900  | 1.23289700  | -0.01245900 |
| H | 7.70928000  | 5.83920800  | -0.01235700 |
| C | 7.87358400  | -3.70469500 | -0.01178500 |
| C | 7.85856900  | -1.23261500 | -0.01226600 |
| C | 7.18598300  | -4.88322700 | -0.01179900 |
| C | 7.16982500  | -2.44404800 | -0.01233800 |
| C | 7.16678300  | 0.00014000  | -0.01270600 |
| C | 5.75825800  | -4.89692800 | -0.01230600 |
| H | 7.70924200  | -5.83893400 | -0.01140100 |
| C | 5.73294100  | -2.45510700 | -0.01296400 |
| C | 5.72654600  | 0.00014600  | -0.01339600 |
| C | 5.03979800  | -3.71953400 | -0.01282000 |
| H | 5.25686800  | -5.86304100 | -0.01226000 |
| C | 5.02004300  | -1.23558100 | -0.01366800 |
| C | 3.56735900  | -3.70143700 | -0.01319600 |
| C | 3.56461900  | -1.22828200 | -0.01468600 |
| C | 2.84818500  | -4.89415200 | -0.01219100 |
| C | 2.86720900  | -2.46787600 | -0.01438100 |
| C | 2.87311700  | 0.00012900  | -0.01527300 |
| C | 1.46347600  | -4.89193400 | -0.01230900 |
| H | 3.37572800  | -5.84554500 | -0.01111400 |
| C | 1.43337600  | -2.47016800 | -0.01501400 |
| C | 1.42000500  | 0.00010100  | -0.01688300 |
| C | 0.73300400  | -3.69976500 | -0.01372600 |
| H | 0.95599700  | -5.84726000 | -0.01118700 |
| C | 0.71449800  | -1.22793200 | -0.01711100 |
| C | -0.72975200 | -3.69800800 | -0.01376600 |
| C | -0.71348600 | -1.22684000 | -0.01716800 |

|   |             |             |             |
|---|-------------|-------------|-------------|
| C | -1.46420900 | -4.88852700 | -0.01247800 |
| C | -1.43184000 | -2.46818500 | -0.01505700 |
| C | -1.41705700 | 0.00011300  | -0.01693500 |
| C | -2.84907200 | -4.89710600 | -0.01241900 |
| H | -0.95096800 | -5.84328800 | -0.01146600 |
| C | -2.86566000 | -2.47067900 | -0.01443800 |
| C | -2.86912900 | 0.00014000  | -0.01525300 |
| C | -3.56579200 | -3.70314700 | -0.01335600 |
| H | -3.37074500 | -5.85051700 | -0.01146300 |
| C | -3.56317300 | -1.22920600 | -0.01467600 |
| C | -5.03753000 | -3.71786900 | -0.01309000 |
| C | -5.01948700 | -1.23484400 | -0.01375300 |
| C | -5.76237400 | -4.89097400 | -0.01274400 |
| C | -5.73348800 | -2.45249500 | -0.01319900 |
| C | -5.72551100 | 0.00015300  | -0.01345200 |
| C | -7.19156800 | -4.88248800 | -0.01238300 |
| H | -5.25772900 | -5.86064200 | -0.01272800 |
| C | -7.17074200 | -2.44524700 | -0.01271600 |
| C | -7.16251800 | 0.00014700  | -0.01289800 |
| C | -7.87788400 | -3.70359800 | -0.01233900 |
| H | -7.71365700 | -5.84009100 | -0.01212200 |
| C | -7.85801600 | -1.23210800 | -0.01261700 |
| H | 8.96131700  | 3.68368600  | -0.01213400 |
| H | 8.94599400  | 1.22613200  | -0.01209000 |
| H | 8.94599300  | -1.22585300 | -0.01181000 |
| H | 8.96130600  | -3.68342200 | -0.01135000 |
| H | -8.96770900 | -3.68307200 | -0.01201400 |
| H | -8.94972300 | -1.22525400 | -0.01226800 |
| H | -8.94972500 | 1.22554600  | -0.01235900 |
| H | -8.96772200 | 3.68334500  | -0.01225300 |
| H | 0.04438100  | 0.02041400  | 2.66902200  |
| H | -0.06685200 | -0.08985900 | 3.39088400  |

XYZ coordinates (in Å) of graphene-metal ion complexes optimized at M06-2X/6-31G\* level

Graphene-Be<sup>2+</sup>

|   |            |             |             |
|---|------------|-------------|-------------|
| C | 4.98614700 | -1.22329300 | -0.02857600 |
| C | 5.71027500 | -2.45037200 | -0.02549400 |
| C | 3.56285100 | -1.22611000 | -0.03436500 |
| C | 7.81738200 | -1.21430900 | -0.01913300 |
| C | 7.14330800 | -2.43888700 | -0.02112700 |
| C | 5.02727100 | -3.68892500 | -0.02686200 |
| C | 2.85522200 | -2.47365900 | -0.03499400 |
| C | 7.86734800 | -3.65614800 | -0.01892200 |
| C | 5.78900500 | -4.86157100 | -0.02504600 |
| C | 3.56750300 | -3.69594900 | -0.03022400 |
| C | 1.42927500 | -2.47100100 | -0.03916100 |
| C | 7.19062000 | -4.85302200 | -0.02112000 |
| H | 5.29678800 | -5.82713200 | -0.02703500 |

|   |             |             |             |
|---|-------------|-------------|-------------|
| C | 2.83719400  | -4.89306500 | -0.02811800 |
| C | 0.70947200  | -1.22597300 | -0.04611300 |
| C | 0.72671400  | -3.69321000 | -0.03546600 |
| H | 7.73099900  | -5.79288300 | -0.01983400 |
| C | 1.46320000  | -4.89021000 | -0.03016400 |
| H | 3.34319600  | -5.85029800 | -0.02357000 |
| C | -0.70971900 | -1.22598000 | -0.04591400 |
| C | -0.72696600 | -3.69321500 | -0.03572700 |
| H | 0.95837800  | -5.84741700 | -0.02708300 |
| C | -1.42952700 | -2.47100500 | -0.03888500 |
| C | -1.46345500 | -4.89021600 | -0.03161200 |
| C | -2.85547700 | -2.47365900 | -0.03486900 |
| C | -2.83745000 | -4.89307000 | -0.02955300 |
| H | -0.95863900 | -5.84743000 | -0.02982100 |
| C | -3.56310500 | -1.22611200 | -0.03390500 |
| C | -3.56775800 | -3.69595400 | -0.03054800 |
| H | -3.34345200 | -5.85030700 | -0.02618900 |
| C | -4.98640300 | -1.22329400 | -0.02836300 |
| C | -5.02752600 | -3.68892600 | -0.02681200 |
| C | -5.71052900 | -2.45037200 | -0.02532600 |
| C | -5.78926100 | -4.86157100 | -0.02464000 |
| C | -7.14356400 | -2.43888700 | -0.02081100 |
| H | -5.29704400 | -5.82713300 | -0.02635800 |
| C | -7.19087600 | -4.85302200 | -0.02054100 |
| C | -7.86760300 | -3.65614800 | -0.01845700 |
| C | -7.81763600 | -1.21431000 | -0.01880800 |
| H | -7.73125500 | -5.79288300 | -0.01901200 |
| C | -7.86760400 | 3.65616300  | -0.01845300 |
| C | -7.81763500 | 1.21432800  | -0.01880700 |
| C | -7.19088000 | 4.85303800  | -0.02053100 |
| C | -7.14356300 | 2.43890600  | -0.02080800 |
| C | -7.12108400 | 0.00001000  | -0.02113800 |
| C | -5.78926600 | 4.86159000  | -0.02462800 |
| H | -7.73126200 | 5.79289700  | -0.01899800 |
| C | -5.71052800 | 2.45039200  | -0.02532200 |
| C | -5.68403100 | 0.00001000  | -0.02611300 |
| C | -5.02752400 | 3.68894800  | -0.02680600 |
| H | -5.29705800 | 5.82715600  | -0.02633600 |
| C | -4.98640200 | 1.22331400  | -0.02836000 |
| C | -3.56775000 | 3.69597400  | -0.03054100 |
| C | -3.56310400 | 1.22612800  | -0.03389800 |
| C | -2.83742900 | 4.89308700  | -0.02955600 |
| C | -2.85547400 | 2.47367400  | -0.03485500 |
| C | -2.85555400 | 0.00000700  | -0.03814000 |
| C | -1.46343300 | 4.89022500  | -0.03160700 |
| H | -3.34341700 | 5.85032900  | -0.02621200 |
| C | -1.42952500 | 2.47101300  | -0.03885800 |
| C | -1.41429700 | 0.00000400  | -0.04531800 |
| C | -0.72696200 | 3.69321800  | -0.03570100 |
| H | -0.95859900 | 5.84743200  | -0.02983300 |

|    |             |             |             |
|----|-------------|-------------|-------------|
| C  | -0.70971900 | 1.22598800  | -0.04588700 |
| C  | 0.72670800  | 3.69321300  | -0.03542700 |
| C  | 0.70947100  | 1.22598000  | -0.04608600 |
| C  | 1.46317700  | 4.89021800  | -0.03010500 |
| C  | 1.42927200  | 2.47100900  | -0.03912800 |
| C  | 1.41405200  | 0.00000400  | -0.04633400 |
| C  | 2.83717100  | 4.89308200  | -0.02806000 |
| H  | 0.95833600  | 5.84741900  | -0.02700100 |
| C  | 2.85521900  | 2.47367400  | -0.03496900 |
| C  | 2.85529800  | 0.00000700  | -0.03857900 |
| C  | 3.56749500  | 3.69597000  | -0.03018900 |
| H  | 3.34315900  | 5.85032100  | -0.02349200 |
| C  | 3.56285000  | 1.22612700  | -0.03435300 |
| C  | 5.02726900  | 3.68894700  | -0.02683900 |
| C  | 4.98614600  | 1.22331300  | -0.02856700 |
| C  | 5.78901100  | 4.86159100  | -0.02502900 |
| C  | 5.71027400  | 2.45039300  | -0.02548000 |
| C  | 5.68377700  | 0.00001000  | -0.02636700 |
| C  | 7.19062500  | 4.85303800  | -0.02111100 |
| H  | 5.29680300  | 5.82715500  | -0.02701700 |
| C  | 7.14330800  | 2.43890600  | -0.02112000 |
| C  | 7.12083200  | 0.00001000  | -0.02141400 |
| C  | 7.86735000  | 3.65616300  | -0.01891600 |
| H  | 7.73100700  | 5.79289700  | -0.01982900 |
| C  | 7.81738200  | 1.21432800  | -0.01913100 |
| H  | -8.95329100 | -3.62691400 | -0.01508900 |
| H  | -8.90580400 | -1.20491200 | -0.01522400 |
| H  | -8.90580400 | 1.20493000  | -0.01522300 |
| H  | -8.95329300 | 3.62692700  | -0.01508700 |
| H  | 8.95303900  | 3.62692700  | -0.01565300 |
| H  | 8.90555000  | 1.20493300  | -0.01562500 |
| H  | 8.90555000  | -1.20491400 | -0.01562500 |
| H  | 8.95303700  | -3.62691500 | -0.01565300 |
| Be | 0.01448300  | -0.00088200 | 3.31348800  |

#### Graphene-Ca<sup>2+</sup>

|   |            |             |             |
|---|------------|-------------|-------------|
| C | 4.99407200 | -1.22656000 | -0.08486200 |
| C | 5.71601600 | -2.45560700 | -0.06115200 |
| C | 3.57023400 | -1.22816400 | -0.09823100 |
| C | 7.82346800 | -1.21706600 | -0.06190400 |
| C | 7.14852700 | -2.44185200 | -0.05005300 |
| C | 5.03278900 | -3.69540600 | -0.04977800 |
| C | 2.86166400 | -2.47429300 | -0.09967500 |
| C | 7.86657500 | -3.66239100 | -0.02868800 |
| C | 5.78767200 | -4.87159000 | -0.03138500 |
| C | 3.57256000 | -3.69761900 | -0.06315000 |
| C | 1.43499200 | -2.47605900 | -0.13177200 |
| C | 7.18861400 | -4.85866700 | -0.02040500 |
| H | 5.29550900 | -5.83675800 | -0.02926400 |
| C | 2.83759200 | -4.89077100 | -0.03231500 |



|   |             |             |             |
|---|-------------|-------------|-------------|
| C | 0.71633100  | -1.23217200 | -0.17134300 |
| C | 0.72723800  | -3.69689600 | -0.10827000 |
| H | 7.73078800  | -5.79763200 | -0.00690500 |
| C | 1.46234800  | -4.89134200 | -0.04757000 |
| H | 3.34379000  | -5.84687300 | 0.01221500  |
| C | -0.71212000 | -1.23087500 | -0.13598900 |
| C | -0.72771100 | -3.69748500 | -0.13925900 |
| H | 0.95725300  | -5.84753900 | -0.00783900 |
| C | -1.43483000 | -2.47695900 | -0.13230600 |
| C | -1.46329500 | -4.89232500 | -0.17638900 |
| C | -2.86157800 | -2.47380200 | -0.14431900 |
| C | -2.83839200 | -4.89136200 | -0.18253500 |
| H | -0.95859900 | -5.84899100 | -0.20910200 |
| C | -3.56978700 | -1.22753900 | -0.14050300 |
| C | -3.57285800 | -3.69742900 | -0.15911300 |
| H | -3.34534100 | -5.84762800 | -0.21146600 |
| C | -4.99383800 | -1.22611700 | -0.12414300 |
| C | -5.03309000 | -3.69518600 | -0.15646600 |
| C | -5.71592300 | -2.45534300 | -0.13469400 |
| C | -5.78823600 | -4.87118100 | -0.16999300 |
| C | -7.14840800 | -2.44171400 | -0.12503500 |
| H | -5.29633400 | -5.83632500 | -0.18709400 |
| C | -7.18921800 | -4.85836200 | -0.16259800 |
| C | -7.86684500 | -3.66211700 | -0.13975500 |
| C | -7.82328900 | -1.21709600 | -0.10145300 |
| H | -7.73153300 | -5.79725300 | -0.17485300 |
| C | -7.86660300 | 3.66219200  | -0.02899200 |
| C | -7.82354100 | 1.21687000  | -0.06252100 |
| C | -7.18862700 | 4.85845500  | -0.02037400 |
| C | -7.14857500 | 2.44164500  | -0.05040500 |
| C | -7.13171100 | -0.00002100 | -0.08694900 |
| C | -5.78768300 | 4.87135700  | -0.03115100 |
| H | -7.73078500 | 5.79742800  | -0.00683500 |
| C | -5.71606400 | 2.45537400  | -0.06137400 |
| C | -5.69204700 | -0.00002300 | -0.09890700 |
| C | -5.03282300 | 3.69516300  | -0.04958800 |
| H | -5.29550600 | 5.83651700  | -0.02877800 |
| C | -4.99412900 | 1.22633000  | -0.08521000 |
| C | -3.57259000 | 3.69733900  | -0.06284500 |
| C | -3.57027200 | 1.22789700  | -0.09765700 |
| C | -2.83757200 | 4.89044100  | -0.03157400 |
| C | -2.86172000 | 2.47402300  | -0.10029400 |
| C | -2.86694600 | -0.00071100 | -0.13075700 |
| C | -1.46231300 | 4.89101500  | -0.04703100 |
| H | -3.34374000 | 5.84654900  | 0.01323200  |
| C | -1.43500500 | 2.47571800  | -0.13093400 |
| C | -1.42330600 | 0.00169800  | -0.15397700 |
| C | -0.72725000 | 3.69660300  | -0.10854700 |
| H | -0.95719500 | 5.84718100  | -0.00683600 |
| C | -0.71637800 | 1.23200000  | -0.17447400 |

|    |             |             |             |
|----|-------------|-------------|-------------|
| C  | 0.72770400  | 3.69720400  | -0.13949500 |
| C  | 0.71199900  | 1.23061400  | -0.13305200 |
| C  | 1.46322700  | 4.89204800  | -0.17743100 |
| C  | 1.43478700  | 2.47669000  | -0.13360800 |
| C  | 1.42328900  | -0.00182800 | -0.15724500 |
| C  | 2.83833100  | 4.89113400  | -0.18377300 |
| H  | 0.95849300  | 5.84868000  | -0.21069800 |
| C  | 2.86152000  | 2.47358700  | -0.14410900 |
| C  | 2.86682600  | 0.00046300  | -0.12898700 |
| C  | 3.57280000  | 3.69722800  | -0.15983500 |
| H  | 3.34526900  | 5.84739600  | -0.21295100 |
| C  | 3.56968000  | 1.22732100  | -0.14127100 |
| C  | 5.03301800  | 3.69497500  | -0.15708300 |
| C  | 4.99372500  | 1.22591400  | -0.12396600 |
| C  | 5.78816700  | 4.87097400  | -0.17075700 |
| C  | 5.71582600  | 2.45513500  | -0.13473200 |
| C  | 5.69195000  | -0.00017700 | -0.09862800 |
| C  | 7.18914100  | 4.85815600  | -0.16312200 |
| H  | 5.29625800  | 5.83610900  | -0.18827600 |
| C  | 7.14831200  | 2.44151300  | -0.12494300 |
| C  | 7.13161800  | -0.00018200 | -0.08652500 |
| C  | 7.86675800  | 3.66190700  | -0.13980400 |
| H  | 7.73147000  | 5.79703700  | -0.17550100 |
| C  | 7.82318300  | 1.21689700  | -0.10095500 |
| H  | -8.95244900 | -3.63535800 | -0.13344500 |
| H  | -8.91090800 | -1.20963700 | -0.09451100 |
| H  | -8.91112400 | 1.20906500  | -0.05444900 |
| H  | -8.95219700 | 3.63558000  | -0.02146000 |
| H  | 8.95236100  | 3.63514500  | -0.13334100 |
| H  | 8.91080400  | 1.20944300  | -0.09392400 |
| H  | 8.91105100  | -1.20923800 | -0.05376900 |
| H  | 8.95216800  | -3.63576700 | -0.02104100 |
| Ca | 0.00063200  | 0.00266500  | 2.47523900  |

Graphene-K<sup>+</sup>

|   |             |            |             |
|---|-------------|------------|-------------|
| C | -5.00104800 | 1.22869200 | -0.10072500 |
| C | -5.72089400 | 2.45900100 | -0.09555500 |
| C | -3.57402100 | 1.22734700 | -0.11550700 |
| C | -7.83103500 | 1.22065100 | -0.08144600 |
| C | -7.15427600 | 2.44316700 | -0.08699100 |
| C | -5.03567300 | 3.70182200 | -0.10122500 |
| C | -2.86455400 | 2.47041800 | -0.11596700 |
| C | -7.86304900 | 3.67096700 | -0.08539300 |
| C | -5.78072000 | 4.88168600 | -0.10067500 |
| C | -3.57475700 | 3.69652900 | -0.10749600 |
| C | -1.43567100 | 2.47275700 | -0.12716500 |
| C | -7.18239900 | 4.86393300 | -0.09304700 |
| H | -5.28693600 | 5.84541700 | -0.10982300 |
| C | -2.83866100 | 4.88783400 | -0.10463800 |
| C | -0.71462100 | 1.22982900 | -0.14209000 |

|   |             |             |             |
|---|-------------|-------------|-------------|
| C | -0.72775900 | 3.69606500  | -0.11828000 |
| H | -7.72574400 | 5.80311200  | -0.09456100 |
| C | -1.46274700 | 4.89016800  | -0.10868200 |
| H | -3.34745900 | 5.84362000  | -0.09958000 |
| C | 0.71428400  | 1.22987600  | -0.15027000 |
| C | 0.72732000  | 3.69605400  | -0.11818500 |
| H | -0.95796500 | 5.84741700  | -0.10882400 |
| C | 1.43523300  | 2.47265200  | -0.12406500 |
| C | 1.46230100  | 4.89010300  | -0.10570000 |
| C | 2.86419400  | 2.47036200  | -0.11743700 |
| C | 2.83822900  | 4.88771800  | -0.10102000 |
| H | 0.95751500  | 5.84734400  | -0.10354700 |
| C | 3.57370400  | 1.22733400  | -0.11375900 |
| C | 3.57438400  | 3.69646100  | -0.10594500 |
| H | 3.34699400  | 5.84351600  | -0.09451900 |
| C | 5.00078200  | 1.22868100  | -0.10195200 |
| C | 5.03533100  | 3.70180800  | -0.10039000 |
| C | 5.72059100  | 2.45898000  | -0.09605500 |
| C | 5.78034900  | 4.88167600  | -0.09978200 |
| C | 7.15398600  | 2.44315300  | -0.08798900 |
| H | 5.28657200  | 5.84541200  | -0.10819900 |
| C | 7.18204400  | 4.86392600  | -0.09278000 |
| C | 7.86272000  | 3.67098100  | -0.08618800 |
| C | 7.83077500  | 1.22065900  | -0.08346400 |
| H | 7.72537800  | 5.80311200  | -0.09421800 |
| C | 7.86272200  | -3.67097200 | -0.08619700 |
| C | 7.83077600  | -1.22065000 | -0.08346700 |
| C | 7.18204600  | -4.86391700 | -0.09279400 |
| C | 7.15398700  | -2.44314400 | -0.08799500 |
| C | 7.14534100  | 0.00000400  | -0.08713900 |
| C | 5.78035200  | -4.88166800 | -0.09979500 |
| H | 7.72538100  | -5.80310300 | -0.09423500 |
| C | 5.72059200  | -2.45897300 | -0.09606100 |
| C | 5.70228200  | 0.00000400  | -0.09666100 |
| C | 5.03533300  | -3.70180100 | -0.10040000 |
| H | 5.28657600  | -5.84540400 | -0.10821700 |
| C | 5.00078300  | -1.22867400 | -0.10195600 |
| C | 3.57438500  | -3.69645400 | -0.10595400 |
| C | 3.57370400  | -1.22732600 | -0.11376300 |
| C | 2.83822900  | -4.88771100 | -0.10102700 |
| C | 2.86419500  | -2.47035500 | -0.11744600 |
| C | 2.86925200  | 0.00000400  | -0.12668500 |
| C | 1.46230100  | -4.89009600 | -0.10570900 |
| H | 3.34699300  | -5.84350900 | -0.09452300 |
| C | 1.43523300  | -2.47264500 | -0.12407700 |
| C | 1.42449200  | 0.00000400  | -0.14243900 |
| C | 0.72732000  | -3.69604700 | -0.11819900 |
| H | 0.95751400  | -5.84733700 | -0.10355300 |
| C | 0.71428400  | -1.22986900 | -0.15028600 |
| C | -0.72775900 | -3.69605800 | -0.11829500 |

|   |             |             |             |
|---|-------------|-------------|-------------|
| C | -0.71462100 | -1.22982200 | -0.14210500 |
| C | -1.46274700 | -4.89016100 | -0.10870100 |
| C | -1.43567100 | -2.47275000 | -0.12717700 |
| C | -1.42487500 | 0.00000400  | -0.14967000 |
| C | -2.83866100 | -4.88782700 | -0.10465400 |
| H | -0.95796500 | -5.84741000 | -0.10885100 |
| C | -2.86455500 | -2.47041100 | -0.11597400 |
| C | -2.86943500 | 0.00000400  | -0.12103300 |
| C | -3.57475800 | -3.69652200 | -0.10750300 |
| H | -3.34745900 | -5.84361300 | -0.09960200 |
| C | -3.57402100 | -1.22734000 | -0.11551000 |
| C | -5.03567500 | -3.70181400 | -0.10122500 |
| C | -5.00104800 | -1.22868400 | -0.10072700 |
| C | -5.78072200 | -4.88167800 | -0.10066800 |
| C | -5.72089400 | -2.45899300 | -0.09555500 |
| C | -5.70253200 | 0.00000400  | -0.09570000 |
| C | -7.18240200 | -4.86392400 | -0.09303800 |
| H | -5.28694000 | -5.84541000 | -0.10981300 |
| C | -7.15427600 | -2.44315800 | -0.08698800 |
| C | -7.14558900 | 0.00000400  | -0.08552500 |
| C | -7.86305100 | -3.67095800 | -0.08538600 |
| H | -7.72574700 | -5.80310300 | -0.09454700 |
| C | -7.83103500 | -1.22064200 | -0.08144500 |
| H | 8.94845400  | 3.64785000  | -0.08160200 |
| H | 8.91783200  | 1.21574700  | -0.07844600 |
| H | 8.91783200  | -1.21573800 | -0.07845000 |
| H | 8.94845500  | -3.64784000 | -0.08161200 |
| H | -8.94878200 | -3.64779400 | -0.08041800 |
| H | -8.91809200 | -1.21571500 | -0.07623300 |
| H | -8.91809100 | 1.21572400  | -0.07623600 |
| H | -8.94878000 | 3.64780300  | -0.08042700 |
| K | 0.00414300  | -0.00009200 | 2.53309500  |

#### Graphene-Li<sup>+</sup>

|   |             |            |             |
|---|-------------|------------|-------------|
| C | -5.00240700 | 1.22925600 | -0.01007000 |
| C | -5.72206200 | 2.45935400 | -0.00899100 |
| C | -3.57555200 | 1.22820500 | -0.01369300 |
| C | -7.83156700 | 1.22063500 | -0.00807800 |
| C | -7.15527100 | 2.44328500 | -0.00857100 |
| C | -5.03722400 | 3.70244400 | -0.00932600 |
| C | -2.86603100 | 2.47152300 | -0.01224500 |
| C | -7.86463500 | 3.67082100 | -0.00907100 |
| C | -5.78252200 | 4.88181600 | -0.01014700 |
| C | -3.57626600 | 3.69754900 | -0.00922700 |
| C | -1.43820400 | 2.47716000 | -0.01398200 |
| C | -7.18438300 | 4.86389000 | -0.01017300 |
| H | -5.28909300 | 5.84577700 | -0.01249000 |
| C | -2.83949700 | 4.88812100 | -0.00668900 |
| C | -0.71715400 | 1.23420500 | -0.03133800 |
| C | -0.72811300 | 3.69822300 | -0.01035100 |

|   |             |             |             |
|---|-------------|-------------|-------------|
| H | -7.72776400 | 5.80296800  | -0.01174900 |
| C | -1.46321800 | 4.89163100  | -0.00640800 |
| H | -3.34827200 | 5.84390500  | -0.00540300 |
| C | 0.71714500  | 1.23419300  | -0.03250700 |
| C | 0.72810000  | 3.69821100  | -0.01040800 |
| H | -0.95901900 | 5.84905400  | -0.00576300 |
| C | 1.43818000  | 2.47712100  | -0.01338200 |
| C | 1.46320300  | 4.89161200  | -0.00625500 |
| C | 2.86601900  | 2.47150800  | -0.01249200 |
| C | 2.83948600  | 4.88809400  | -0.00643200 |
| H | 0.95900600  | 5.84903600  | -0.00549400 |
| C | 3.57556400  | 1.22820700  | -0.01328900 |
| C | 3.57626100  | 3.69753000  | -0.00909300 |
| H | 3.34825500  | 5.84388200  | -0.00511600 |
| C | 5.00242300  | 1.22925100  | -0.01017800 |
| C | 5.03722500  | 3.70243300  | -0.00926600 |
| C | 5.72207200  | 2.45934500  | -0.00902800 |
| C | 5.78251500  | 4.88180500  | -0.01013500 |
| C | 7.15528100  | 2.44328200  | -0.00864400 |
| H | 5.28908400  | 5.84576600  | -0.01244700 |
| C | 7.18438000  | 4.86388700  | -0.01020400 |
| C | 7.86463800  | 3.67082500  | -0.00916600 |
| C | 7.83158400  | 1.22063700  | -0.00824300 |
| H | 7.72775200  | 5.80296900  | -0.01181400 |
| C | 7.86463700  | -3.67082400 | -0.00912900 |
| C | 7.83158400  | -1.22063700 | -0.00823100 |
| C | 7.18437900  | -4.86388600 | -0.01015500 |
| C | 7.15528100  | -2.44328200 | -0.00862100 |
| C | 7.14596800  | 0.00000000  | -0.00856900 |
| C | 5.78251500  | -4.88180500 | -0.01008900 |
| H | 7.72775200  | -5.80296900 | -0.01175300 |
| C | 5.72207100  | -2.45934400 | -0.00900700 |
| C | 5.70317800  | 0.00000000  | -0.00981300 |
| C | 5.03722400  | -3.70243300 | -0.00923500 |
| H | 5.28908400  | -5.84576600 | -0.01239000 |
| C | 5.00242300  | -1.22925000 | -0.01016900 |
| C | 3.57626000  | -3.69752900 | -0.00907000 |
| C | 3.57556300  | -1.22820600 | -0.01328200 |
| C | 2.83948600  | -4.88809300 | -0.00640600 |
| C | 2.86601900  | -2.47150800 | -0.01248100 |
| C | 2.87440300  | 0.00000000  | -0.01627100 |
| C | 1.46320200  | -4.89161100 | -0.00623700 |
| H | 3.34825400  | -5.84388100 | -0.00508200 |
| C | 1.43818000  | -2.47712000 | -0.01337800 |
| C | 1.42962100  | 0.00000100  | -0.03279600 |
| C | 0.72810000  | -3.69821000 | -0.01040400 |
| H | 0.95900500  | -5.84903500 | -0.00547300 |
| C | 0.71714500  | -1.23419100 | -0.03251700 |
| C | -0.72811300 | -3.69822200 | -0.01035700 |
| C | -0.71715400 | -1.23420300 | -0.03134900 |

|    |             |             |             |
|----|-------------|-------------|-------------|
| C  | -1.46321800 | -4.89163000 | -0.00641700 |
| C  | -1.43820400 | -2.47715900 | -0.01399300 |
| C  | -1.42960200 | 0.00000100  | -0.03403900 |
| C  | -2.83949700 | -4.88812000 | -0.00670600 |
| H  | -0.95901900 | -5.84905300 | -0.00576900 |
| C  | -2.86603100 | -2.47152300 | -0.01226100 |
| C  | -2.87435800 | 0.00000000  | -0.01539200 |
| C  | -3.57626500 | -3.69754800 | -0.00924900 |
| H  | -3.34827100 | -5.84390400 | -0.00542100 |
| C  | -3.57555200 | -1.22820500 | -0.01370200 |
| C  | -5.03722400 | -3.70244300 | -0.00935800 |
| C  | -5.00240700 | -1.22925500 | -0.01008000 |
| C  | -5.78252200 | -4.88181500 | -0.01019700 |
| C  | -5.72206200 | -2.45935300 | -0.00901300 |
| C  | -5.70315700 | 0.00000000  | -0.00979200 |
| C  | -7.18438300 | -4.86388900 | -0.01022700 |
| H  | -5.28909200 | -5.84577700 | -0.01255400 |
| C  | -7.15527100 | -2.44328400 | -0.00859600 |
| C  | -7.14595000 | 0.00000000  | -0.00847800 |
| C  | -7.86463500 | -3.67082100 | -0.00911200 |
| H  | -7.72776400 | -5.80296700 | -0.01181800 |
| C  | -7.83156700 | -1.22063500 | -0.00809100 |
| H  | 8.95033500  | 3.64730300  | -0.00972700 |
| H  | 8.91863400  | 1.21540400  | -0.00849700 |
| H  | 8.91863400  | -1.21540400 | -0.00848400 |
| H  | 8.95033500  | -3.64730300 | -0.00968800 |
| H  | -8.95033300 | -3.64729400 | -0.00965900 |
| H  | -8.91861800 | -1.21539900 | -0.00835600 |
| H  | -8.91861800 | 1.21539900  | -0.00834200 |
| H  | -8.95033300 | 3.64729400  | -0.00961600 |
| Li | -0.00005500 | -0.00005700 | 1.76966500  |

Graphene-Mg<sup>2+</sup>

|   |             |            |             |
|---|-------------|------------|-------------|
| C | -4.98620700 | 1.22340600 | -0.09092200 |
| C | -5.71032600 | 2.45048900 | -0.08563900 |
| C | -3.56293700 | 1.22621800 | -0.09976500 |
| C | -7.81740800 | 1.21442300 | -0.07603800 |
| C | -7.14334200 | 2.43900200 | -0.07877900 |
| C | -5.02732300 | 3.68902600 | -0.08724500 |
| C | -2.85530400 | 2.47378100 | -0.10075800 |
| C | -7.86738900 | 3.65624700 | -0.07472700 |
| C | -5.78906400 | 4.86167600 | -0.08343200 |
| C | -3.56757700 | 3.69604500 | -0.09278700 |
| C | -1.42939700 | 2.47113000 | -0.10715700 |
| C | -7.19066400 | 4.85312500 | -0.07734200 |
| H | -5.29685300 | 5.82723800 | -0.08553400 |
| C | -2.83725400 | 4.89315300 | -0.08960800 |
| C | -0.70959300 | 1.22609900 | -0.11925100 |
| C | -0.72684500 | 3.69329600 | -0.10048500 |
| H | -7.73104100 | 5.79298500 | -0.07464200 |

|   |             |             |             |
|---|-------------|-------------|-------------|
| C | -1.46329400 | 4.89030900  | -0.09238200 |
| H | -3.34325400 | 5.85037300  | -0.08303100 |
| C | 0.70954200  | 1.22608800  | -0.11914500 |
| C | 0.72680100  | 3.69329000  | -0.10032200 |
| H | -0.95843200 | 5.84748100  | -0.08772000 |
| C | 1.42935000  | 2.47112600  | -0.10719600 |
| C | 1.46324600  | 4.89030300  | -0.09163200 |
| C | 2.85525500  | 2.47378500  | -0.10069400 |
| C | 2.83720500  | 4.89315400  | -0.08878700 |
| H | 0.95837300  | 5.84746600  | -0.08638400 |
| C | 3.56289500  | 1.22622300  | -0.09978900 |
| C | 3.56752900  | 3.69604700  | -0.09258200 |
| H | 3.34319800  | 5.85037200  | -0.08143900 |
| C | 4.98616100  | 1.22340700  | -0.09084800 |
| C | 5.02727700  | 3.68902600  | -0.08734300 |
| C | 5.71028400  | 2.45049200  | -0.08561200 |
| C | 5.78902100  | 4.86167600  | -0.08408800 |
| C | 7.14329800  | 2.43900400  | -0.07879100 |
| H | 5.29681600  | 5.82723900  | -0.08678000 |
| C | 7.19062200  | 4.85312600  | -0.07801000 |
| C | 7.86734700  | 3.65625000  | -0.07499300 |
| C | 7.81736300  | 1.21442400  | -0.07594300 |
| H | 7.73099700  | 5.79298900  | -0.07568800 |
| C | 7.86732500  | -3.65604300 | -0.07517700 |
| C | 7.81735800  | -1.21421000 | -0.07604900 |
| C | 7.19059100  | -4.85291600 | -0.07810300 |
| C | 7.14328700  | -2.43878700 | -0.07897600 |
| C | 7.12082100  | 0.00010900  | -0.07968100 |
| C | 5.78899000  | -4.86145200 | -0.08416400 |
| H | 7.73095600  | -5.79278300 | -0.07569300 |
| C | 5.71027400  | -2.45026300 | -0.08581100 |
| C | 5.68377400  | 0.00011400  | -0.08745400 |
| C | 5.02726500  | -3.68879400 | -0.08758800 |
| H | 5.29675900  | -5.82700700 | -0.08663500 |
| C | 4.98615800  | -1.22317600 | -0.09097300 |
| C | 3.56752800  | -3.69580900 | -0.09296300 |
| C | 3.56289100  | -1.22598300 | -0.09987500 |
| C | 2.83721600  | -4.89291800 | -0.08951200 |
| C | 2.85525500  | -2.47354800 | -0.10095000 |
| C | 2.85538700  | 0.00012000  | -0.10736400 |
| C | 1.46325600  | -4.89007500 | -0.09227800 |
| H | 3.34322400  | -5.85013500 | -0.08261300 |
| C | 1.42935300  | -2.47089600 | -0.10739600 |
| C | 1.41421800  | 0.00011600  | -0.11914000 |
| C | 0.72680200  | -3.69306500 | -0.10066500 |
| H | 0.95839900  | -5.84724800 | -0.08728800 |
| C | 0.70954900  | -1.22586400 | -0.11942200 |
| C | -0.72684500 | -3.69305900 | -0.10067500 |
| C | -0.70958500 | -1.22585500 | -0.11936000 |
| C | -1.46329200 | -4.89007400 | -0.09234000 |

|    |             |             |             |
|----|-------------|-------------|-------------|
| C  | -1.42939100 | -2.47089000 | -0.10741000 |
| C  | -1.41426300 | 0.00011700  | -0.11907300 |
| C  | -2.83725000 | -4.89292400 | -0.08950300 |
| H  | -0.95841700 | -5.84723800 | -0.08747700 |
| C  | -2.85529800 | -2.47355000 | -0.10090600 |
| C  | -2.85543100 | 0.00011500  | -0.10734800 |
| C  | -3.56756800 | -3.69581400 | -0.09293400 |
| H  | -3.34325300 | -5.85014000 | -0.08254400 |
| C  | -3.56293700 | -1.22599100 | -0.09988200 |
| C  | -5.02731100 | -3.68879800 | -0.08755600 |
| C  | -4.98620500 | -1.22317900 | -0.09099000 |
| C  | -5.78904500 | -4.86145200 | -0.08412800 |
| C  | -5.71032000 | -2.45026500 | -0.08582100 |
| C  | -5.68382000 | 0.00011300  | -0.08753700 |
| C  | -7.19064600 | -4.85291000 | -0.07804900 |
| H  | -5.29682900 | -5.82701200 | -0.08662100 |
| C  | -7.14333600 | -2.43878500 | -0.07899200 |
| C  | -7.12086700 | 0.00010900  | -0.07979700 |
| C  | -7.86737800 | -3.65603600 | -0.07515300 |
| H  | -7.73101700 | -5.79277300 | -0.07561200 |
| C  | -7.81740500 | -1.21420800 | -0.07613500 |
| H  | 8.95302800  | 3.62700900  | -0.06990500 |
| H  | 8.90552400  | 1.20503100  | -0.07043700 |
| H  | 8.90551900  | -1.20482300 | -0.07055100 |
| H  | 8.95300700  | -3.62680900 | -0.07012400 |
| H  | -8.95305900 | -3.62680400 | -0.07009100 |
| H  | -8.90556600 | -1.20481900 | -0.07066500 |
| H  | -8.90556900 | 1.20503100  | -0.07056900 |
| H  | -8.95307100 | 3.62700800  | -0.06968700 |
| Mg | 0.00085700  | -0.00430600 | 3.46692000  |

#### Graphene-Na<sup>+</sup>

|   |            |             |             |
|---|------------|-------------|-------------|
| C | 5.00212700 | -1.22903500 | -0.05085500 |
| C | 5.72182700 | -2.45918400 | -0.05007900 |
| C | 3.57506100 | -1.22796600 | -0.05438000 |
| C | 7.83170700 | -1.22065300 | -0.04855500 |
| C | 7.15517000 | -2.44321500 | -0.04957700 |
| C | 5.03673900 | -3.70222600 | -0.05131500 |
| C | 2.86557500 | -2.47104000 | -0.05398000 |
| C | 7.86422900 | -3.67091700 | -0.05091100 |
| C | 5.78195900 | -4.88178700 | -0.05314200 |
| C | 3.57577100 | -3.69722400 | -0.05113100 |
| C | 1.43693700 | -2.47506000 | -0.05552400 |
| C | 7.18376800 | -4.86391400 | -0.05309200 |
| H | 5.28835400 | -5.84565100 | -0.05706100 |
| C | 2.83928400 | -4.88813700 | -0.04905500 |
| C | 0.71599300 | -1.23222900 | -0.06722300 |
| C | 0.72780900 | -3.69755600 | -0.05293400 |
| H | 7.72713100 | -5.80304400 | -0.05589700 |
| C | 1.46310600 | -4.89116400 | -0.04934700 |



|   |             |             |             |
|---|-------------|-------------|-------------|
| H | 3.34807900  | -5.84392500 | -0.04873000 |
| C | -0.71595600 | -1.23223600 | -0.06737800 |
| C | -0.72778000 | -3.69756200 | -0.05276100 |
| H | 0.95870600  | -5.84857100 | -0.05060000 |
| C | -1.43690600 | -2.47505900 | -0.05545900 |
| C | -1.46307700 | -4.89116300 | -0.04855600 |
| C | -2.86554600 | -2.47103300 | -0.05396600 |
| C | -2.83926100 | -4.88812800 | -0.04822900 |
| H | -0.95868700 | -5.84857500 | -0.04918800 |
| C | -3.57503100 | -1.22796800 | -0.05438300 |
| C | -3.57574200 | -3.69722200 | -0.05088300 |
| H | -3.34806500 | -5.84391400 | -0.04730600 |
| C | -5.00210100 | -1.22903700 | -0.05085300 |
| C | -5.03670700 | -3.70222700 | -0.05131900 |
| C | -5.72179500 | -2.45918300 | -0.05007600 |
| C | -5.78191200 | -4.88178800 | -0.05343200 |
| C | -7.15514000 | -2.44321600 | -0.04964200 |
| H | -5.28829900 | -5.84564900 | -0.05761200 |
| C | -7.18372400 | -4.86391800 | -0.05345700 |
| C | -7.86419000 | -3.67092600 | -0.05112000 |
| C | -7.83167700 | -1.22065700 | -0.04858700 |
| H | -7.72708200 | -5.80305000 | -0.05646900 |
| C | -7.86419100 | 3.67093000  | -0.05109300 |
| C | -7.83167700 | 1.22066000  | -0.04857800 |
| C | -7.18372500 | 4.86392200  | -0.05342000 |
| C | -7.15514000 | 2.44322000  | -0.04962400 |
| C | -7.14613400 | 0.00000200  | -0.04873200 |
| C | -5.78191200 | 4.88179200  | -0.05339700 |
| H | -7.72708200 | 5.80305400  | -0.05642500 |
| C | -5.72179500 | 2.45918600  | -0.05005900 |
| C | -5.70320500 | 0.00000200  | -0.05004900 |
| C | -5.03670700 | 3.70223000  | -0.05129300 |
| H | -5.28829900 | 5.84565300  | -0.05756800 |
| C | -5.00210200 | 1.22904100  | -0.05084400 |
| C | -3.57574300 | 3.69722600  | -0.05085900 |
| C | -3.57503100 | 1.22797200  | -0.05437400 |
| C | -2.83926300 | 4.88813300  | -0.04820000 |
| C | -2.86554600 | 2.47103700  | -0.05394900 |
| C | -2.87210500 | 0.00000200  | -0.05686600 |
| C | -1.46307900 | 4.89116800  | -0.04853200 |
| H | -3.34806800 | 5.84391800  | -0.04726900 |
| C | -1.43690600 | 2.47506400  | -0.05544400 |
| C | -1.42742000 | 0.00000300  | -0.06828500 |
| C | -0.72778000 | 3.69756700  | -0.05274700 |
| H | -0.95869000 | 5.84858000  | -0.04915900 |
| C | -0.71595600 | 1.23224200  | -0.06736300 |
| C | 0.72781000  | 3.69756100  | -0.05293100 |
| C | 0.71599300  | 1.23223500  | -0.06721000 |
| C | 1.46310700  | 4.89116900  | -0.04935900 |
| C | 1.43693700  | 2.47506600  | -0.05552200 |

|    |             |             |             |
|----|-------------|-------------|-------------|
| C  | 1.42745000  | 0.00000300  | -0.06827900 |
| C  | 2.83928600  | 4.88814100  | -0.04907600 |
| H  | 0.95870900  | 5.84857600  | -0.05061900 |
| C  | 2.86557500  | 2.47104500  | -0.05398600 |
| C  | 2.87213500  | 0.00000200  | -0.05668500 |
| C  | 3.57577200  | 3.69722800  | -0.05114800 |
| H  | 3.34808200  | 5.84392900  | -0.04876100 |
| C  | 3.57506100  | 1.22797100  | -0.05438500 |
| C  | 5.03674000  | 3.70223000  | -0.05133700 |
| C  | 5.00212700  | 1.22903800  | -0.05086100 |
| C  | 5.78196000  | 4.88179000  | -0.05317500 |
| C  | 5.72182700  | 2.45918800  | -0.05009400 |
| C  | 5.70323100  | 0.00000200  | -0.05007900 |
| C  | 7.18376900  | 4.86391700  | -0.05312700 |
| H  | 5.28835500  | 5.84565500  | -0.05710000 |
| C  | 7.15517000  | 2.44321900  | -0.04959400 |
| C  | 7.14616200  | 0.00000200  | -0.04874900 |
| C  | 7.86423000  | 3.67092000  | -0.05093800 |
| H  | 7.72713200  | 5.80304700  | -0.05594100 |
| C  | 7.83170700  | 1.22065600  | -0.04856400 |
| H  | -8.94991200 | -3.64759200 | -0.05195600 |
| H  | -8.91873700 | -1.21557900 | -0.04919900 |
| H  | -8.91873700 | 1.21558200  | -0.04918900 |
| H  | -8.94991300 | 3.64759600  | -0.05192900 |
| H  | 8.94995200  | 3.64758000  | -0.05174000 |
| H  | 8.91876800  | 1.21557900  | -0.04914500 |
| H  | 8.91876700  | -1.21557600 | -0.04913500 |
| H  | 8.94995100  | -3.64757700 | -0.05171100 |
| Na | -0.00066500 | -0.00008600 | 2.19179600  |

Graphene-NH<sub>4</sub><sup>+</sup>

|   |             |            |             |
|---|-------------|------------|-------------|
| C | -4.99535800 | 1.22087900 | -0.06327500 |
| C | -5.71498700 | 2.45118000 | -0.05628400 |
| C | -3.56826200 | 1.21946000 | -0.08883500 |
| C | -7.82497800 | 1.21269200 | -0.02706800 |
| C | -7.14834200 | 2.43511300 | -0.03907600 |
| C | -5.02984500 | 3.69421600 | -0.06922400 |
| C | -2.85869300 | 2.46224200 | -0.09675900 |
| C | -7.85665200 | 3.66332400 | -0.03655200 |
| C | -5.77440700 | 4.87428200 | -0.06841100 |
| C | -3.56899600 | 3.68855700 | -0.08284000 |
| C | -1.42930600 | 2.46393700 | -0.11706500 |
| C | -7.17607300 | 4.85618500 | -0.05229800 |
| H | -5.28083800 | 5.83799900 | -0.08557900 |
| C | -2.83281200 | 4.87977400 | -0.07931200 |
| C | -0.70837300 | 1.22113600 | -0.13635900 |
| C | -0.72194200 | 3.68813100 | -0.10302500 |
| H | -7.71959700 | 5.79528400 | -0.05413100 |
| C | -1.45698100 | 4.88218400 | -0.08604500 |
| H | -3.34172700 | 5.83543300 | -0.06795000 |

|   |             |             |             |
|---|-------------|-------------|-------------|
| C | 0.72029700  | 1.22158700  | -0.13134400 |
| C | 0.73297000  | 3.68857400  | -0.09975700 |
| H | -0.95210300 | 5.83936600  | -0.08098000 |
| C | 1.44058900  | 2.46434400  | -0.09809400 |
| C | 1.46787100  | 4.88278700  | -0.08756600 |
| C | 2.86990800  | 2.46262900  | -0.08221800 |
| C | 2.84365100  | 4.88041100  | -0.07488300 |
| H | 0.96301400  | 5.83996900  | -0.09438100 |
| C | 3.57893400  | 1.21982500  | -0.07198900 |
| C | 3.57968800  | 3.68896800  | -0.06966400 |
| H | 3.35241600  | 5.83622000  | -0.07101000 |
| C | 5.00581000  | 1.22145400  | -0.05559600 |
| C | 5.04047400  | 3.69441600  | -0.05528800 |
| C | 5.72566800  | 2.45176100  | -0.04789000 |
| C | 5.78565500  | 4.87435800  | -0.05007600 |
| C | 7.15895700  | 2.43627700  | -0.03389100 |
| H | 5.29183600  | 5.83809700  | -0.05922800 |
| C | 7.18720100  | 4.85696400  | -0.03707600 |
| C | 7.86782900  | 3.66387200  | -0.02876600 |
| C | 7.83573300  | 1.21363600  | -0.02689300 |
| H | 7.73042500  | 5.79618900  | -0.03529100 |
| C | 7.86843200  | -3.67709400 | -0.02647500 |
| C | 7.83572900  | -1.22718200 | -0.02587000 |
| C | 7.18794400  | -4.87023600 | -0.03299200 |
| C | 7.15904500  | -2.44980600 | -0.03140400 |
| C | 7.14998000  | -0.00674500 | -0.03243600 |
| C | 5.78637100  | -4.88780000 | -0.04369100 |
| H | 7.73124300  | -5.80942000 | -0.03108300 |
| C | 5.72568800  | -2.46553100 | -0.04336900 |
| C | 5.70709300  | -0.00686300 | -0.04647200 |
| C | 5.04065600  | -3.70818500 | -0.04868400 |
| H | 5.29260600  | -5.85156500 | -0.05020300 |
| C | 5.00549900  | -1.23532600 | -0.05182800 |
| C | 3.57989800  | -3.70341500 | -0.05908400 |
| C | 3.57866100  | -1.23417500 | -0.06540700 |
| C | 2.84429000  | -4.89502000 | -0.06309900 |
| C | 2.86946500  | -2.47767300 | -0.06822300 |
| C | 2.87424600  | -0.00721000 | -0.08299800 |
| C | 1.46861000  | -4.89722400 | -0.07034300 |
| H | 3.35310400  | -5.85080700 | -0.06324400 |
| C | 1.44136700  | -2.48046900 | -0.07407600 |
| C | 1.43048300  | -0.00664300 | -0.10027400 |
| C | 0.73367600  | -3.70292900 | -0.07433500 |
| H | 0.96374000  | -5.85436700 | -0.07828300 |
| C | 0.72002900  | -1.23730000 | -0.09943100 |
| C | -0.72137000 | -3.70289800 | -0.07304700 |
| C | -0.70978300 | -1.23761000 | -0.10785700 |
| C | -1.45580000 | -4.89690600 | -0.05344600 |
| C | -1.42951500 | -2.47999400 | -0.08943000 |
| C | -1.41861800 | -0.00839000 | -0.13692600 |

|   |             |             |             |
|---|-------------|-------------|-------------|
| C | -2.83184000 | -4.89522600 | -0.04999400 |
| H | -0.95072400 | -5.85390400 | -0.04122700 |
| C | -2.85810500 | -2.47827100 | -0.07828400 |
| C | -2.86288600 | -0.00829900 | -0.09537000 |
| C | -3.56822400 | -3.70447600 | -0.06279600 |
| H | -3.34024500 | -5.85110200 | -0.03390200 |
| C | -3.56789700 | -1.23591700 | -0.08073300 |
| C | -5.02915400 | -3.71009600 | -0.05540600 |
| C | -4.99493100 | -1.23697200 | -0.05769400 |
| C | -5.77378700 | -4.89006700 | -0.05485500 |
| C | -5.71465900 | -2.46726600 | -0.04757700 |
| C | -5.69671100 | -0.00810400 | -0.05153600 |
| C | -7.17551300 | -4.87221400 | -0.04225400 |
| H | -5.27987400 | -5.85364500 | -0.06904500 |
| C | -7.14804700 | -2.45135600 | -0.03326700 |
| C | -7.13981600 | -0.00817200 | -0.03321000 |
| C | -7.85639900 | -3.67951800 | -0.02980900 |
| H | -7.71880800 | -5.81145300 | -0.04376700 |
| C | -7.82491900 | -1.22904300 | -0.02466700 |
| H | 8.95353900  | 3.64067400  | -0.01974300 |
| H | 8.92278700  | 1.20861800  | -0.01786800 |
| H | 8.92279700  | -1.22209900 | -0.01745100 |
| H | 8.95414000  | -3.65354200 | -0.01896000 |
| H | -8.94210400 | -3.65662300 | -0.02061700 |
| H | -8.91191200 | -1.22424100 | -0.01454800 |
| H | -8.91196300 | 1.20784200  | -0.01596900 |
| H | -8.94233900 | 3.64036900  | -0.02516900 |
| N | -0.23317300 | 0.31162500  | 2.64707300  |
| H | -1.24218800 | 0.35039400  | 2.45342500  |
| H | 0.18431100  | -0.37566600 | 1.98869600  |
| H | 0.17682100  | 1.22945000  | 2.43044400  |
| H | -0.05264600 | 0.04594300  | 3.61994100  |

Graphene-NMe<sub>4</sub><sup>+</sup>

|   |            |             |             |
|---|------------|-------------|-------------|
| C | 5.13201000 | -1.22750500 | -0.21863300 |
| C | 5.85279200 | -2.45755500 | -0.20189800 |
| C | 3.70593600 | -1.22647700 | -0.25550800 |
| C | 7.96222400 | -1.21961600 | -0.14901600 |
| C | 7.28573700 | -2.44268300 | -0.16679900 |
| C | 5.16786700 | -3.69942100 | -0.22145700 |
| C | 2.99716300 | -2.47006500 | -0.27418000 |
| C | 7.99622300 | -3.66879700 | -0.15238600 |
| C | 5.91506800 | -4.87863000 | -0.20601200 |
| C | 3.70762100 | -3.69559600 | -0.25815100 |
| C | 1.56947300 | -2.47011100 | -0.31043300 |
| C | 7.31606200 | -4.86230300 | -0.17202600 |
| H | 5.42116700 | -5.84228900 | -0.22295200 |
| C | 2.97383100 | -4.88820700 | -0.28169700 |
| C | 0.84961500 | -1.22795900 | -0.33839500 |
| C | 0.86413300 | -3.69402000 | -0.32433700 |

|   |             |             |             |
|---|-------------|-------------|-------------|
| H | 7.85888600  | -5.80168900 | -0.16286800 |
| C | 1.59880200  | -4.88888000 | -0.31316800 |
| H | 3.48248600  | -5.84412800 | -0.27900600 |
| C | -0.57495100 | -1.22898700 | -0.38190100 |
| C | -0.58988900 | -3.69532100 | -0.34957500 |
| H | 1.09365800  | -5.84575200 | -0.33829000 |
| C | -1.29623700 | -2.47177100 | -0.38339200 |
| C | -1.32487500 | -4.88985500 | -0.33715800 |
| C | -2.72603700 | -2.47142700 | -0.40883100 |
| C | -2.70041200 | -4.88872000 | -0.36201000 |
| H | -0.81988400 | -5.84666500 | -0.30711400 |
| C | -3.43678200 | -1.22801500 | -0.42918700 |
| C | -3.43660400 | -3.69781100 | -0.39990000 |
| H | -3.20959000 | -5.84430100 | -0.35097600 |
| C | -4.86503200 | -1.23032600 | -0.43689100 |
| C | -4.89772300 | -3.70481800 | -0.42697600 |
| C | -5.58403100 | -2.46135100 | -0.43793900 |
| C | -5.64006300 | -4.88580900 | -0.44023800 |
| C | -7.01790900 | -2.44486500 | -0.45478500 |
| H | -5.14552300 | -5.84907800 | -0.44335900 |
| C | -7.04198400 | -4.86695800 | -0.45939000 |
| C | -7.72384800 | -3.67504400 | -0.46441800 |
| C | -7.69544800 | -1.22316600 | -0.46253000 |
| H | -7.58531700 | -5.80631000 | -0.47288300 |
| C | -7.72425900 | 3.67260600  | -0.47008800 |
| C | -7.69559000 | 1.22073000  | -0.46436300 |
| C | -7.04252600 | 4.86459600  | -0.46690700 |
| C | -7.01819500 | 2.44251100  | -0.45820600 |
| C | -7.01194500 | -0.00117500 | -0.45642300 |
| C | -5.64060800 | 4.88363200  | -0.44701400 |
| H | -7.58594400 | 5.80386700  | -0.48250900 |
| C | -5.58432500 | 2.45918300  | -0.44076700 |
| C | -5.56792500 | -0.00107800 | -0.44336600 |
| C | -4.89817200 | 3.70274500  | -0.43102200 |
| H | -5.14614500 | 5.84693400  | -0.45216600 |
| C | -4.86518800 | 1.22825200  | -0.43817500 |
| C | -3.43708100 | 3.69592700  | -0.40229700 |
| C | -3.43692000 | 1.22611000  | -0.43041300 |
| C | -2.70112200 | 4.88693200  | -0.36257400 |
| C | -2.72632900 | 2.46965600  | -0.41086800 |
| C | -2.73030500 | -0.00092100 | -0.43095900 |
| C | -1.32560500 | 4.88825000  | -0.33671800 |
| H | -3.21050100 | 5.84239300  | -0.35034600 |
| C | -1.29654800 | 2.47018000  | -0.38483200 |
| C | -1.28415700 | -0.00081600 | -0.40645300 |
| C | -0.59043100 | 3.69381600  | -0.35007800 |
| H | -0.82076700 | 5.84508600  | -0.30483700 |
| C | -0.57510800 | 1.22746200  | -0.38243800 |
| C | 0.86359300  | 3.69271800  | -0.32483100 |
| C | 0.84942400  | 1.22664400  | -0.33835500 |

|   |             |             |             |
|---|-------------|-------------|-------------|
| C | 1.59807000  | 4.88769800  | -0.31439500 |
| C | 1.56910000  | 2.46891000  | -0.31061000 |
| C | 1.55689300  | -0.00060600 | -0.31779200 |
| C | 2.97309600  | 4.88724300  | -0.28290300 |
| H | 1.09277200  | 5.84446700  | -0.34047400 |
| C | 2.99678500  | 2.46909000  | -0.27440600 |
| C | 2.99979600  | -0.00049300 | -0.27445100 |
| C | 3.70705000  | 3.69474100  | -0.25873700 |
| H | 3.48162400  | 5.84323300  | -0.28090500 |
| C | 3.70574700  | 1.22561000  | -0.25561300 |
| C | 5.16728900  | 3.69880400  | -0.22197200 |
| C | 5.13181700  | 1.22687900  | -0.21877700 |
| C | 5.91429500  | 4.87813900  | -0.20663000 |
| C | 5.85240500  | 2.45704800  | -0.20222500 |
| C | 5.83320900  | -0.00025700 | -0.20073800 |
| C | 7.31528700  | 4.86204200  | -0.17265000 |
| H | 5.42023300  | 5.84171600  | -0.22362100 |
| C | 7.28535200  | 2.44241300  | -0.16712700 |
| C | 7.27531200  | -0.00013700 | -0.16514000 |
| C | 7.99563800  | 3.66864200  | -0.15288200 |
| H | 7.85796400  | 5.80151600  | -0.16359400 |
| C | 7.96203100  | 1.21945100  | -0.14917900 |
| H | -8.80955100 | -3.65343300 | -0.48067900 |
| H | -8.78232900 | -1.21935000 | -0.47763600 |
| H | -8.78246700 | 1.21676100  | -0.47971400 |
| H | -8.80995300 | 3.65085000  | -0.48679600 |
| H | 9.08112700  | 3.64463700  | -0.12783100 |
| H | 9.04898500  | 1.21409800  | -0.12411900 |
| H | 9.04917700  | -1.21408400 | -0.12395300 |
| H | 9.08170800  | -3.64460800 | -0.12732200 |
| N | -1.43495300 | 0.00722500  | 3.48909600  |
| C | -2.15115500 | -1.20861800 | 2.98211900  |
| H | -3.18381600 | -1.17749500 | 3.33319900  |
| H | -2.12584600 | -1.19759300 | 1.89219800  |
| H | -1.64502700 | -2.09688500 | 3.36335500  |
| C | -2.12008100 | 1.23509800  | 2.96831300  |
| H | -3.14367100 | 1.25052800  | 3.34592200  |
| H | -1.57256500 | 2.11406700  | 3.31219300  |
| H | -2.12336600 | 1.19458100  | 1.87902600  |
| C | -0.01730900 | -0.01378300 | 3.00126800  |
| H | 0.49492200  | 0.87263500  | 3.37886400  |
| H | 0.46543400  | -0.91971200 | 3.37132000  |
| H | -0.02648900 | -0.00905700 | 1.91134800  |
| C | -1.45217800 | 0.01612900  | 4.98267400  |
| H | -0.93455700 | 0.90974200  | 5.33440800  |
| H | -2.48875500 | 0.02399200  | 5.32241200  |
| H | -0.94455700 | -0.87886300 | 5.34530700  |

Graphene-OH<sub>3</sub><sup>+</sup>

|   |             |             |             |
|---|-------------|-------------|-------------|
| C | -5.00236300 | 1.23060100  | -0.05684000 |
| C | -5.72148900 | 2.46041100  | -0.05352300 |
| C | -3.57490500 | 1.22944100  | -0.06093600 |
| C | -7.83185200 | 1.22287800  | -0.05105200 |
| C | -7.15489000 | 2.44498700  | -0.05180400 |
| C | -5.03566800 | 3.70337000  | -0.05382300 |
| C | -2.86465400 | 2.47084000  | -0.06204000 |
| C | -7.86337200 | 3.67320400  | -0.05252100 |
| C | -5.78032300 | 4.88300800  | -0.05644600 |
| C | -3.57468700 | 3.69754400  | -0.05244400 |
| C | -1.43491100 | 2.47352000  | -0.06062800 |
| C | -7.18234700 | 4.86570700  | -0.05561700 |
| H | -5.28649800 | 5.84675900  | -0.06204400 |
| C | -2.83786700 | 4.88772200  | -0.04229000 |
| C | -0.71540300 | 1.23256700  | -0.08338800 |
| C | -0.72613200 | 3.69774900  | -0.05481100 |
| H | -7.72519200 | 5.80512500  | -0.05884900 |
| C | -1.46138400 | 4.89068200  | -0.04254400 |
| H | -3.34631500 | 5.84368500  | -0.03471400 |
| C | 0.71666900  | 1.23355400  | -0.06112300 |
| C | 0.72889800  | 3.69923400  | -0.05408500 |
| H | -0.95718800 | 5.84811700  | -0.03546400 |
| C | 1.43772600  | 2.47628600  | -0.06060600 |
| C | 1.46436300  | 4.89260700  | -0.05116000 |
| C | 2.86677900  | 2.47247900  | -0.05760000 |
| C | 2.84069800  | 4.88968000  | -0.05267700 |
| H | 0.96016000  | 5.85008900  | -0.05306200 |
| C | 3.57522400  | 1.22983400  | -0.06389800 |
| C | 3.57703100  | 3.69886700  | -0.05655900 |
| H | 3.34943500  | 5.84547100  | -0.05235100 |
| C | 5.00212100  | 1.23019000  | -0.05988700 |
| C | 5.03788700  | 3.70326800  | -0.06045100 |
| C | 5.72244300  | 2.45983600  | -0.06062200 |
| C | 5.78386500  | 4.88235900  | -0.06384400 |
| C | 7.15573600  | 2.44351300  | -0.06333200 |
| H | 5.29066200  | 5.84644700  | -0.06593600 |
| C | 7.18567900  | 4.86402800  | -0.06763900 |
| C | 7.86562000  | 3.67073800  | -0.06687900 |
| C | 7.83153400  | 1.22058000  | -0.06189400 |
| H | 7.72934000  | 5.80295900  | -0.07178900 |
| C | 7.86361600  | -3.67016800 | -0.04654400 |
| C | 7.83029500  | -1.22034900 | -0.05529400 |
| C | 7.18348700  | -4.86334600 | -0.04123400 |
| C | 7.15387700  | -2.44289000 | -0.05163800 |
| C | 7.14498800  | 0.00047900  | -0.05899000 |
| C | 5.78170500  | -4.88105000 | -0.04194900 |
| H | 7.72684700  | -5.80243300 | -0.03672600 |
| C | 5.72060100  | -2.45858600 | -0.05244400 |
| C | 5.70227300  | 0.00076500  | -0.05885300 |

|   |             |             |             |
|---|-------------|-------------|-------------|
| C | 5.03602600  | -3.70179200 | -0.04976700 |
| H | 5.28802800  | -5.84490800 | -0.03658700 |
| C | 5.00093500  | -1.22842100 | -0.05642000 |
| C | 3.57542100  | -3.69744700 | -0.05469800 |
| C | 3.57406400  | -1.22732300 | -0.06153300 |
| C | 2.83917000  | -4.88822700 | -0.06299400 |
| C | 2.86521900  | -2.47107800 | -0.05399100 |
| C | 2.87132600  | 0.00186100  | -0.05993100 |
| C | 1.46293100  | -4.89098700 | -0.06734300 |
| H | 3.34790400  | -5.84400400 | -0.07016800 |
| C | 1.43684700  | -2.47593400 | -0.06001000 |
| C | 1.42943000  | 0.00312300  | -0.08069200 |
| C | 0.72771400  | -3.69749900 | -0.06196300 |
| H | 0.95852100  | -5.84825700 | -0.08129800 |
| C | 0.71567700  | -1.23084900 | -0.05149100 |
| C | -0.72778500 | -3.69575700 | -0.06592000 |
| C | -0.71831700 | -1.23026300 | -0.09014200 |
| C | -1.46289700 | -4.88826500 | -0.05594500 |
| C | -1.43681700 | -2.47170200 | -0.06928900 |
| C | -1.42725300 | 0.00139500  | -0.07383200 |
| C | -2.83969000 | -4.88508500 | -0.05651400 |
| H | -0.95892400 | -5.84580800 | -0.04858800 |
| C | -2.86614100 | -2.46845700 | -0.07103100 |
| C | -2.87165500 | 0.00120400  | -0.07324100 |
| C | -3.57641700 | -3.69519800 | -0.06368600 |
| H | -3.34816300 | -5.84104800 | -0.05103800 |
| C | -3.57541100 | -1.22677100 | -0.06499300 |
| C | -5.03747600 | -3.70045000 | -0.06304500 |
| C | -5.00294400 | -1.22752000 | -0.06036700 |
| C | -5.78263800 | -4.87967800 | -0.06613600 |
| C | -5.72262100 | -2.45710800 | -0.05961500 |
| C | -5.70380300 | 0.00164600  | -0.05616800 |
| C | -7.18467800 | -4.86170500 | -0.06369700 |
| H | -5.28921700 | -5.84362900 | -0.07299700 |
| C | -7.15598700 | -2.44102800 | -0.05658100 |
| C | -7.14658800 | 0.00196400  | -0.05275300 |
| C | -7.86508200 | -3.66890800 | -0.05849700 |
| H | -7.72799000 | -5.80085000 | -0.06728200 |
| C | -7.83239700 | -1.21860300 | -0.05321600 |
| H | 8.95130000  | 3.64684200  | -0.07043900 |
| H | 8.91857700  | 1.21470700  | -0.06432700 |
| H | 8.91737700  | -1.21534600 | -0.05637900 |
| H | 8.94930700  | -3.64641400 | -0.04737400 |
| H | -8.95077700 | -3.64566600 | -0.05718800 |
| H | -8.91942000 | -1.21339100 | -0.05188600 |
| H | -8.91887900 | 1.21815500  | -0.05030600 |
| H | -8.94908200 | 3.65050000  | -0.05235600 |
| H | -0.95166000 | -0.05087400 | 2.34204400  |
| H | 0.39972300  | -0.73150300 | 1.88775100  |
| H | 0.37123400  | 0.80204500  | 2.22879300  |



|                                        |             |             |             |
|----------------------------------------|-------------|-------------|-------------|
| O                                      | 0.01458800  | -0.06680600 | 2.55287600  |
| Graphene-OMe <sub>3</sub> <sup>+</sup> |             |             |             |
| C                                      | -5.10802100 | 1.22727900  | -0.16138800 |
| C                                      | -5.82883600 | 2.45731400  | -0.15028100 |
| C                                      | -3.68178500 | 1.22624300  | -0.18665700 |
| C                                      | -7.93858400 | 1.21953400  | -0.11565300 |
| C                                      | -7.26196000 | 2.44261000  | -0.12767400 |
| C                                      | -5.14379700 | 3.69908900  | -0.16314500 |
| C                                      | -2.97279800 | 2.46984100  | -0.19845000 |
| C                                      | -7.97276100 | 3.66854000  | -0.11922700 |
| C                                      | -5.89128100 | 4.87820600  | -0.15422800 |
| C                                      | -3.68329600 | 3.69539700  | -0.18636800 |
| C                                      | -1.54490300 | 2.46996900  | -0.22305600 |
| C                                      | -7.29250400 | 4.86210600  | -0.13271300 |
| H                                      | -5.39729400 | 5.84190000  | -0.16656300 |
| C                                      | -2.94922200 | 4.88796600  | -0.20043000 |
| C                                      | -0.82491000 | 1.22768000  | -0.24664400 |
| C                                      | -0.83932000 | 3.69378600  | -0.22995000 |
| H                                      | -7.83528800 | 5.80149900  | -0.12814000 |
| C                                      | -1.57395300 | 4.88864200  | -0.22094000 |
| H                                      | -3.45770100 | 5.84396100  | -0.19872800 |
| C                                      | 0.60024400  | 1.22853600  | -0.27938600 |
| C                                      | 0.61495600  | 3.69505600  | -0.24729400 |
| H                                      | -1.06863600 | 5.84555400  | -0.23900500 |
| C                                      | 1.32144600  | 2.47140200  | -0.27892000 |
| C                                      | 1.35008600  | 4.88943100  | -0.23133500 |
| C                                      | 2.75147400  | 2.47096700  | -0.30103300 |
| C                                      | 2.72580500  | 4.88811400  | -0.25239800 |
| H                                      | 0.84522500  | 5.84630500  | -0.20209300 |
| C                                      | 3.46234500  | 1.22725000  | -0.31860800 |
| C                                      | 3.46227600  | 3.69739200  | -0.29003700 |
| H                                      | 3.23501100  | 5.84362100  | -0.23854300 |
| C                                      | 4.89100900  | 1.22960300  | -0.32284400 |
| C                                      | 4.92354400  | 3.70428600  | -0.31451300 |
| C                                      | 5.60977400  | 2.46044300  | -0.32306500 |
| C                                      | 5.66572500  | 4.88506200  | -0.32733500 |
| C                                      | 7.04370100  | 2.44375300  | -0.33602400 |
| H                                      | 5.17141500  | 5.84843000  | -0.33286800 |
| C                                      | 7.06787700  | 4.86594700  | -0.34309700 |
| C                                      | 7.74961200  | 3.67412800  | -0.34509000 |
| C                                      | 7.72118300  | 1.22218700  | -0.34034300 |
| H                                      | 7.61129900  | 5.80522100  | -0.35611000 |
| C                                      | 7.74965700  | -3.67389900 | -0.33988100 |
| C                                      | 7.72119300  | -1.22198100 | -0.33853100 |
| C                                      | 7.06796400  | -4.86575800 | -0.33687100 |
| C                                      | 7.04370300  | -2.44355000 | -0.33312700 |
| C                                      | 7.03772900  | 0.00010100  | -0.33468600 |
| C                                      | 5.66581900  | -4.88490300 | -0.32312300 |
| H                                      | 7.61145300  | -5.80502200 | -0.34757400 |

|   |             |             |             |
|---|-------------|-------------|-------------|
| C | 5.60975800  | -2.46026300 | -0.32153400 |
| C | 5.59375300  | 0.00009900  | -0.32625200 |
| C | 4.92354900  | -3.70411300 | -0.31331900 |
| H | 5.17158500  | -5.84831600 | -0.32731300 |
| C | 4.89089400  | -1.22942100 | -0.32228700 |
| C | 3.46224100  | -3.69723300 | -0.29242900 |
| C | 3.46233300  | -1.22712200 | -0.31849200 |
| C | 2.72565000  | -4.88798500 | -0.25991900 |
| C | 2.75152800  | -2.47066800 | -0.30270300 |
| C | 2.75578000  | -0.00007000 | -0.32028000 |
| C | 1.34987600  | -4.88935800 | -0.24066800 |
| H | 3.23475100  | -5.84358400 | -0.24914200 |
| C | 1.32127400  | -2.47124900 | -0.28227500 |
| C | 1.30949800  | 0.00002600  | -0.29877600 |
| C | 0.61474700  | -3.69503500 | -0.25323700 |
| H | 0.84501500  | -5.84634000 | -0.21546800 |
| C | 0.60000300  | -1.22831500 | -0.28114600 |
| C | -0.83945300 | -3.69369800 | -0.23426600 |
| C | -0.82497600 | -1.22752800 | -0.24803200 |
| C | -1.57412800 | -4.88852900 | -0.22501700 |
| C | -1.54494700 | -2.46979900 | -0.22532200 |
| C | -1.53255700 | -0.00000700 | -0.23253500 |
| C | -2.94936400 | -4.88781700 | -0.20269000 |
| H | -1.06887700 | -5.84545800 | -0.24393600 |
| C | -2.97286400 | -2.46968800 | -0.19928900 |
| C | -2.97582000 | 0.00005300  | -0.20052100 |
| C | -3.68338400 | -3.69523500 | -0.18705900 |
| H | -3.45787000 | -5.84379800 | -0.20094900 |
| C | -3.68181300 | -1.22609500 | -0.18680900 |
| C | -5.14386400 | -3.69891900 | -0.16221100 |
| C | -5.10806400 | -1.22710900 | -0.16116000 |
| C | -5.89133500 | -4.87802700 | -0.15181900 |
| C | -5.82889400 | -2.45712700 | -0.14942900 |
| C | -5.80927900 | 0.00008600  | -0.14926700 |
| C | -7.29254700 | -4.86190200 | -0.12932900 |
| H | -5.39736000 | -5.84173300 | -0.16360700 |
| C | -7.26201500 | -2.44240100 | -0.12611100 |
| C | -7.25149400 | 0.00009700  | -0.12566700 |
| C | -7.97280400 | -3.66833400 | -0.11640600 |
| H | -7.83532500 | -5.80129400 | -0.12358900 |
| C | -7.93862100 | -1.21931200 | -0.11471800 |
| H | 8.83533100  | 3.65252700  | -0.35823300 |
| H | 8.80806700  | 1.21834200  | -0.35196400 |
| H | 8.80808300  | -1.21815400 | -0.34960100 |
| H | 8.83538900  | -3.65227900 | -0.35183700 |
| H | -9.05843700 | -3.64410500 | -0.10013100 |
| H | -9.02574100 | -1.21374600 | -0.09850000 |
| H | -9.02570900 | 1.21400300  | -0.09969000 |
| H | -9.05840200 | 3.64431800  | -0.10355400 |
| O | 1.44207800  | 0.00113400  | 3.44973500  |

|   |             |             |            |
|---|-------------|-------------|------------|
| C | 2.11115400  | 1.24797400  | 3.04745200 |
| H | 1.45744800  | 2.06020700  | 3.35943100 |
| H | 3.05392000  | 1.27066800  | 3.59097000 |
| H | 2.25942400  | 1.23207400  | 1.96652800 |
| C | 2.19251700  | -1.20323700 | 3.06321900 |
| H | 3.20862400  | -1.05631600 | 3.42479600 |
| H | 1.71059600  | -2.03541600 | 3.57249400 |
| H | 2.15680900  | -1.30501500 | 1.97745000 |
| C | 0.02317600  | -0.04922800 | 3.06825100 |
| H | -0.35289600 | -1.00649100 | 3.42399000 |
| H | -0.45707200 | 0.77779200  | 3.58775700 |
| H | -0.05164400 | 0.04388600  | 1.98423100 |

Graphene-SMe<sub>3</sub><sup>+</sup>

|   |             |             |             |
|---|-------------|-------------|-------------|
| C | 4.93867500  | -1.08243500 | -0.39861800 |
| C | 5.66543600  | -2.30841600 | -0.44136800 |
| C | 3.51089800  | -1.08741200 | -0.41340700 |
| C | 7.76889300  | -1.05869300 | -0.37884600 |
| C | 7.09910500  | -2.28370800 | -0.43346300 |
| C | 4.98768500  | -3.55507600 | -0.49615800 |
| C | 2.80899700  | -2.33491400 | -0.46254100 |
| C | 7.81345400  | -3.50783600 | -0.48371800 |
| C | 5.73813600  | -4.73036300 | -0.54723500 |
| C | 3.52655900  | -3.55725100 | -0.49530700 |
| C | 1.37867300  | -2.34432800 | -0.45911200 |
| C | 7.13976300  | -4.70324900 | -0.54119900 |
| H | 5.25032400  | -5.69563700 | -0.60210600 |
| C | 2.79723500  | -4.75289700 | -0.52439700 |
| C | 0.64960500  | -1.10496900 | -0.40959600 |
| C | 0.67905300  | -3.57338000 | -0.49060300 |
| H | 7.68915100  | -5.63803300 | -0.58581100 |
| C | 1.42137300  | -4.76354300 | -0.52137400 |
| H | 3.31249900  | -5.70488500 | -0.55236000 |
| C | -0.77700400 | -1.11416600 | -0.38731200 |
| C | -0.77652600 | -3.58150900 | -0.47069700 |
| H | 0.92180500  | -5.72331800 | -0.55099200 |
| C | -1.48977700 | -2.36156200 | -0.41442800 |
| C | -1.50421300 | -4.78092600 | -0.49324700 |
| C | -2.91814500 | -2.37092600 | -0.37859900 |
| C | -2.87933000 | -4.78835700 | -0.46252300 |
| H | -0.99356200 | -5.73375900 | -0.54762300 |
| C | -3.63408800 | -1.13263600 | -0.31867400 |
| C | -3.62090000 | -3.60124600 | -0.40426400 |
| H | -3.38281900 | -5.74663900 | -0.48962700 |
| C | -5.06030500 | -1.14406800 | -0.28519600 |
| C | -5.08121800 | -3.61559100 | -0.37215700 |
| C | -5.77318600 | -2.37847500 | -0.31204100 |
| C | -5.82017400 | -4.79956600 | -0.40059400 |
| C | -7.20629700 | -2.37272800 | -0.28084100 |
| H | -5.32106900 | -5.75925800 | -0.45258300 |

|   |             |             |             |
|---|-------------|-------------|-------------|
| C | -7.22128500 | -4.79177600 | -0.37037400 |
| C | -7.90837300 | -3.60356400 | -0.31096600 |
| C | -7.89040200 | -1.15505400 | -0.22377500 |
| H | -7.75906800 | -5.73377400 | -0.39703400 |
| C | -7.95252100 | 3.73187100  | -0.06718500 |
| C | -7.90528000 | 1.28363000  | -0.14318800 |
| C | -7.27870300 | 4.92877900  | -0.04585400 |
| C | -7.23570500 | 2.51017000  | -0.11907000 |
| C | -7.21170800 | 0.06881400  | -0.19728200 |
| C | -5.87765500 | 4.95462400  | -0.07360300 |
| H | -7.82681800 | 5.86443600  | -0.00795900 |
| C | -5.80265600 | 2.53463600  | -0.14841900 |
| C | -5.76920300 | 0.07827800  | -0.22835400 |
| C | -5.12443000 | 3.78044300  | -0.12413400 |
| H | -5.38925700 | 5.92101800  | -0.05592500 |
| C | -5.07480700 | 1.30974100  | -0.20313100 |
| C | -3.66392300 | 3.78521800  | -0.15208200 |
| C | -3.64833000 | 1.31811000  | -0.23410500 |
| C | -2.93635100 | 4.98149600  | -0.12779000 |
| C | -2.94628100 | 2.56500900  | -0.20535200 |
| C | -2.93519300 | 0.09753600  | -0.29258600 |
| C | -1.56110000 | 4.99107200  | -0.14647000 |
| H | -3.45039000 | 5.93388800  | -0.09333400 |
| C | -1.51826800 | 2.57439700  | -0.22896500 |
| C | -1.49215200 | 0.10773400  | -0.32789800 |
| C | -0.81937200 | 3.80149600  | -0.19275600 |
| H | -1.06146200 | 5.95089600  | -0.12793400 |
| C | -0.79044400 | 1.33824800  | -0.29267100 |
| C | 0.63473700  | 3.81079500  | -0.19964000 |
| C | 0.63510200  | 1.34834700  | -0.31140500 |
| C | 1.36195800  | 5.00868700  | -0.14615300 |
| C | 1.34867000  | 2.59281100  | -0.25487800 |
| C | 1.35192800  | 0.12702900  | -0.36844800 |
| C | 2.73747700  | 5.01569000  | -0.14664800 |
| H | 0.85108100  | 5.96175300  | -0.10246600 |
| C | 2.77727800  | 2.60084800  | -0.25504100 |
| C | 2.79675000  | 0.13519400  | -0.36968900 |
| C | 3.48024900  | 3.82955100  | -0.19929500 |
| H | 3.24034300  | 5.97370900  | -0.10415500 |
| C | 3.49517200  | 1.36361300  | -0.30670500 |
| C | 4.94136000  | 3.84426500  | -0.19618000 |
| C | 4.92303500  | 1.37301500  | -0.29778100 |
| C | 5.67815900  | 5.02800600  | -0.14858300 |
| C | 5.63529200  | 2.60650800  | -0.24206700 |
| C | 5.63341600  | 0.14945900  | -0.34254000 |
| C | 7.08009700  | 5.01833700  | -0.14327000 |
| H | 5.17812900  | 5.98791100  | -0.11688500 |
| C | 7.06908700  | 2.59895000  | -0.23537200 |
| C | 7.07704800  | 0.15772700  | -0.33288100 |
| C | 7.76905400  | 3.83107100  | -0.18453100 |

|   |             |             |             |
|---|-------------|-------------|-------------|
| H | 7.61733800  | 5.96051100  | -0.10713100 |
| C | 7.75409800  | 1.38193200  | -0.27961700 |
| H | -8.99407000 | -3.58705500 | -0.28901700 |
| H | -8.97736900 | -1.15729800 | -0.20219800 |
| H | -8.99217200 | 1.27125700  | -0.12190000 |
| H | -9.03791100 | 3.70131200  | -0.04658300 |
| H | 8.85495100  | 3.81524800  | -0.18168000 |
| H | 8.84111800  | 1.38409800  | -0.27577700 |
| H | 8.85585300  | -1.04802900 | -0.37543200 |
| H | 8.89909300  | -3.47910500 | -0.48044900 |
| S | 0.74089900  | -1.22259800 | 3.75620100  |
| C | -0.04993700 | -2.61490800 | 2.91678100  |
| H | 0.47983300  | -3.52330600 | 3.20944200  |
| H | -1.08706600 | -2.66235800 | 3.25401700  |
| H | 0.00470800  | -2.46145900 | 1.83747900  |
| C | -0.09543800 | 0.17923100  | 2.97919100  |
| H | -1.13434100 | 0.17540700  | 3.31441000  |
| H | 0.40129900  | 1.09120700  | 3.31605100  |
| H | -0.03234800 | 0.07691300  | 1.89450500  |
| C | 2.34919500  | -1.17805300 | 2.93032200  |
| H | 2.86696800  | -0.27482000 | 3.25904200  |
| H | 2.90895700  | -2.06204600 | 3.24143700  |
| H | 2.19974400  | -1.16991000 | 1.84909100  |
